# Supplementary material
Source: ML conference proceedings conference paper supplement (https://openaccess.thecvf.com/content/cvpr_2015/html/Zhou_ConceptLearner_Discovering_Visual_2015_CVPR_paper.html)
Supplement: Supplementary file 1 [file 381_SuppA_ConceptRecognition_SUN.pdf › 0381-supp/381_SuppA_ConceptRecognition_SUN.pdf]

# Supplementary Material A - ConceptLearner: Discovering Visual Concepts from Weakly Labeled Image Collections

Bolei Zhou<sup>†</sup>, Vignesh Jagadeesh<sup>‡</sup>, Robinson Piramuthu<sup>‡</sup>  
<sup>†</sup>MIT <sup>‡</sup>eBay Research Labs  
 bolei@mit.edu, [vjagadeesh, rpiramuthu]@ebay.com

In this supplementary, we show the result of concept recognition on 500 random images from SUN397 dataset. See Section 6.1 of the main paper for details.

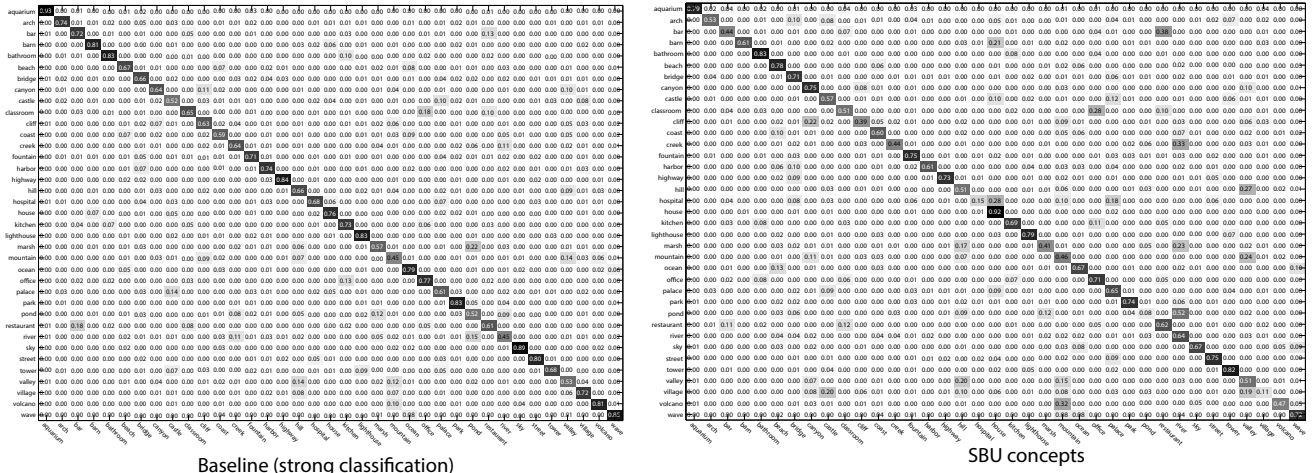

Figure 1. Confusion matrices of baseline and SBU concepts. These correspond to the results shown in Figure 7 of the main paper. See Section 6.2 of main paper for details. Categories correspond to 37 matched scene categories between SUN and SBU datasets. 50 images per attribute were used for training the baseline linear SVM classifier.

Table 1: Concept recognition on 500 random images from SUN397. Results based on concepts learned from NUS-WIDE and SBU datasets are shown in separate columns.

| Index | Image                                                                               | NUS-WIDE Concepts                                                                                                                    | SBU Concepts                                                                                                                                                                                                                                                                               |
|-------|-------------------------------------------------------------------------------------|--------------------------------------------------------------------------------------------------------------------------------------|--------------------------------------------------------------------------------------------------------------------------------------------------------------------------------------------------------------------------------------------------------------------------------------------|
| 1     |    | shore,rocks,blue<br>sand,waves,blue<br>desert,dunes,explore<br>sand,nature,desert<br>beach,landscape,clouds                          | bed-lake:NN<br>sand-the:DET<br>sand-beach:PREP_OF<br>dunes-the:DET<br>beach-bay:PREP_IN<br>root-dunes:ROOT<br>sand-wet:AMOD<br>beach-cannon:NN<br>dunes-sand:NN<br>sand-white:AMOD<br>sand-beach:PREP_ON<br>beach-the:DET<br>sand-beach:PREP_AT<br>lake-salt:NN<br>beach-ocean:NN          |
| 2     |   | tennis,green,lines<br>pool,apartments,architecture<br>line,geometry,abstract<br>fisheye,architecture,city<br>green,forest,trees      | tub-hot:AMOD<br>water-green:AMOD<br>pool-swimming:AMOD<br>pool-swimming:NN<br>one-boats:PREP_OF<br>root-model:ROOT<br>deck-a:DET<br>shape-good:AMOD<br>pool-the:DET<br>lock-the:DET<br>root-reflections:ROOT<br>deck-the:DET<br>filled-water:PREP_WITH<br>house-club:NN<br>root-green:ROOT |
| 3     |  | airport,travel,architecture<br>girls,asian,basketball<br>flying,california,pilot<br>sports,football,game<br>restaurant,street,people | root-play:ROOT<br>class-the:DET<br>game-a:DET<br>shirt-gray:AMOD<br>collection-the:DET<br>play-boys:NSUBJ<br>seats-box:NN<br>ball-the:DET<br>playing-ball:DOBJ<br>shirt-red:AMOD<br>team-the:DET<br>street-shopping:NN<br>scene-street:NN<br>ball-basket:NN<br>shrine-the:DET              |

Continued on next page

**Table1 – continued from previous page**

| Index                  | Image                                                                               | NUS-WIDE Concepts                                                                                                         | SBU Concepts                                                                                                                                                                                                                                                                                                                      |
|------------------------|-------------------------------------------------------------------------------------|---------------------------------------------------------------------------------------------------------------------------|-----------------------------------------------------------------------------------------------------------------------------------------------------------------------------------------------------------------------------------------------------------------------------------------------------------------------------------|
| 4                      |    | buddhist,monks,burma<br>asia,people,asian<br>china,street,man<br>vegetables,color,people<br>guard,police,coast            | shirt-orange:AMOD<br>market-flower:NN<br>shirt-red:AMOD<br>market-central:AMOD<br>market-a:DET<br>market-local:AMOD<br>market-the:DET<br>root-women:ROOT<br>market-air:NN<br>bouquet-the:DET<br>dress-traditional:AMOD<br>bags-plastic:AMOD<br>market-town:PREP_IN<br>me-shirt:PREP_IN<br>dude-the:DET                            |
| 5                      |   | needles,sky,water<br>army,mountains,abandoned<br>tundra,colorado,mountain<br>rifles,great,world<br>bridge,trees,landscape | view-hill:PREP_FROM<br>river-bridge:CONJ_AND<br>view-of:PREP<br>root-trail:ROOT<br>house-hill:PREP_ON<br>river-snake:NN<br>view-castle:PREP_FROM<br>mark-the:DET<br>view-top:PREP_FROM<br>view-field:PREP_OF<br>crosses-train:NSUBJ<br>road-bridge:DEP<br>root-span:ROOT<br>bridge-high:AMOD<br>view-road:PREP_FROM               |
| 6                      |  | mall,shop,ontario<br>ontario,mall,city<br>car,road,light<br>airport,travel,architecture<br>sign,night,building            | house-glass:NN<br>wall-glass:NN<br>station-bus:NN<br>reflected-window:PREP_IN<br>reflection-window:PREP_IN<br>liked-reflection:DOBJ<br>view-window:NN<br>view-room:PREP_FROM<br>mall-shopping:NN<br>floor-top:AMOD<br>house-hill:PREP_IN<br>window-office:PREP_OF<br>root-reflection:ROOT<br>apartment-floor:NN<br>walls-glass:NN |
| Continued on next page |                                                                                     |                                                                                                                           |                                                                                                                                                                                                                                                                                                                                   |

**Table1 – continued from previous page**

| Index                  | Image                                                                               | NUS-WIDE Concepts                                                                                                        | SBU Concepts                                                                                                                                                                                                                                                                                                   |
|------------------------|-------------------------------------------------------------------------------------|--------------------------------------------------------------------------------------------------------------------------|----------------------------------------------------------------------------------------------------------------------------------------------------------------------------------------------------------------------------------------------------------------------------------------------------------------|
| 7                      |    | restaurant,street,people<br>mall,shop,ontario<br>bar,city,cafe<br>cafe,bar,street<br>neon,street,buildings               | area-bar:NN<br>root-bar:ROOT<br>bar-little:AMOD<br>office-box:NN<br>street-market:NN<br>stage-the:DET<br>bar-an:DET<br>floor-ground:NN<br>style-the:DET<br>theater-the:DET<br>room-floor:PREP_ON<br>market-night:NN<br>shelves-the:DET<br>bar-the:DET<br>market-house:PREP_NEAR                                |
| 8                      |   | work,office,apple<br>furniture,chairs,retro<br>classroom,california,apple<br>chair,room,office<br>chairs,interior,office | chairs-the:DET<br>tables-the:DET<br>table-chairs:CONJ_AND<br>tables-chairs:CONJ_AND<br>desk-a:DET<br>table-pool:NN<br>root-tables:ROOT<br>table-window:PREP_BY<br>table-house:PREP_IN<br>desk-office:NN<br>desk-room:PREP_IN<br>desk-office:PREP_IN<br>root-chairs:ROOT<br>lab-computer:NN<br>root-lounge:ROOT |
| 9                      |  | bridge,california,night<br>bay,bridge,city<br>gate,bridge,california<br>sail,harbor,port<br>golden,gate,bridge           | bridge-golden:AMOD<br>bridge-gate:NN<br>county-marin:NN<br>bridge-golden:NN<br>span-the:DET<br>gate-golden:AMOD<br>ship-tall:AMOD<br>crosses-river:DOBJ<br>bridge-bay:NN<br>view-bridge:PREP_OF<br>bridge-the:DET<br>shot-bridge:PREP_OF<br>spans-bridge:NSUBJ<br>sail-to:AUX<br>port-the:DET                  |
| Continued on next page |                                                                                     |                                                                                                                          |                                                                                                                                                                                                                                                                                                                |



**Table1 – continued from previous page**

| Index | Image                                                                               | NUS-WIDE Concepts                                                                                                                      | SBU Concepts                                                                                                                                                                                                                                                                                                    |
|-------|-------------------------------------------------------------------------------------|----------------------------------------------------------------------------------------------------------------------------------------|-----------------------------------------------------------------------------------------------------------------------------------------------------------------------------------------------------------------------------------------------------------------------------------------------------------------|
| 10    |    | waterways,marsh,landscape<br>natural,sea,ocean<br>bridge,trees,landscape<br>pond,trees,reflections<br>india,landscape,sunset           | castle-old:AMOD<br>side-river:NN<br>root-river:ROOT<br>lake-an:DET<br>view-bridge:PREP_FROM<br>river-the:DET<br>made-lake:DOBJ<br>river-house:PREP_BY<br>lake-middle:PREP_IN<br>view-river:PREP_OF<br>season-rainy:AMOD<br>looking-river:PREP_OVER<br>view-lake:PREP_OF<br>bridge-looking:VMOD<br>level-the:DET |
| 11    |   | restaurant,street,people<br>design,interior,furniture<br>display,apple,mac<br>shooting,studio,playing<br>polaroid,abandoned,california | fireplace-the:DET<br>plan-floor:NN<br>area-bar:NN<br>desk-the:DET<br>mirror-bathroom:PREP_IN<br>created-style:PREP_WITH<br>root-desk:ROOT<br>mirror-the:DET<br>shelf-book:NN<br>wall-bar:PREP_IN<br>table-bar:PREP_IN<br>girl-mirror:PREP_IN<br>screen-big:AMOD<br>collection-the:DET<br>video-the:DET          |
| 12    |  | design,interior,furniture<br>interior,furniture,house<br>work,office,apple<br>office,apple,mac<br>modern,interior,furniture            | desk-room:PREP_IN<br>tv-screen:NN<br>office-home:NN<br>root-downstairs:ROOT<br>room-kitchen:CONJ_AND<br>desk-office:PREP_IN<br>root-desk:ROOT<br>root-upstairs:ROOT<br>room-living:NN<br>house-bedroom:AMOD<br>office-new:AMOD<br>room-guest:NN<br>room-family:NN<br>table-window:PREP_BY<br>bedroom-guest:NN   |

Continued on next page

Table1 – continued from previous page

| Index                  | Image                                                                               | NUS-WIDE Concepts                                                                                                                  | SBU Concepts                                                                                                                                                                                                                                                                                                             |
|------------------------|-------------------------------------------------------------------------------------|------------------------------------------------------------------------------------------------------------------------------------|--------------------------------------------------------------------------------------------------------------------------------------------------------------------------------------------------------------------------------------------------------------------------------------------------------------------------|
| 13                     |    | stone,architecture,old<br>bridge,bridges,architecture<br>france,architecture,night<br>italy,water,italians<br>vacation,europe,blue | bridge-water:DOBJ<br>bridge-river:DOBJ<br>built-bridge:NSUBJ<br>bridge-an:DET<br>bridge-small:AMOD<br>bridge-wooden:AMOD<br>bridge-oldest:AMOD<br>bridge-foot:NN<br>goes-bridge:NSUBJ<br>walkway-the:DET<br>root-towers:ROOT<br>temple-the:DET<br>bridge-leading:VMOD<br>water-troubled:AMOD<br>bridge-river:PREP_ACROSS |
| 14                     |   | aerial,city,germany<br>vintage,sky,explore<br>lines,urban,color<br>world,germany,berlin<br>interior,light,museum                   | building-yellow:AMOD<br>floor-third:AMOD<br>floor-fourth:AMOD<br>floor-building:PREP_OF<br>bridge-glass:NN<br>passes-as:MARK<br>stairs-the:DET<br>root-theater:ROOT<br>train-an:DET<br>view-window:PREP_FROM<br>root-balcony:ROOT<br>corner-the:DET<br>root-stairs:ROOT<br>platform-the:DET<br>bridge-harbour:NN         |
| 15                     |  | michigan,decay,architecture<br>maryland,architecture,buildings<br>roof,old,church<br>wisconsin,rural,snow<br>barge,harbour,sea     | waterfront-the:DET<br>chimney-the:DET<br>house-light:AMOD<br>cute-house:DOBJ<br>house-victorian:AMOD<br>building-every:DET<br>building-random:AMOD<br>floor-bottom:AMOD<br>root-palace:ROOT<br>built-house:DOBJ<br>house-big:AMOD<br>tower-clock:NN<br>root-hotel:ROOT<br>tower-town:PREP_IN<br>tower-square:PREP_IN     |
| Continued on next page |                                                                                     |                                                                                                                                    |                                                                                                                                                                                                                                                                                                                          |

**Table1 – continued from previous page**

| Index | Image                                                                               | NUS-WIDE Concepts                                                                                                               | SBU Concepts                                                                                                                                                                                                                                                                                                       |
|-------|-------------------------------------------------------------------------------------|---------------------------------------------------------------------------------------------------------------------------------|--------------------------------------------------------------------------------------------------------------------------------------------------------------------------------------------------------------------------------------------------------------------------------------------------------------------|
| 16    |    | toys,display,home<br>tokyo,buildings,night<br>kitchen,interior,design<br>store,people,street<br>library,explore,interestingness | root-wall:ROOT<br>wall-one:NUM<br>board-the:DET<br>covered-walls:NSUBJPASS<br>classroom-the:DET<br>wall-house:PREP_IN<br>corner-the:DET<br>corner-bottom:AMOD<br>wall-an:DET<br>shops-the:DET<br>shelves-the:DET<br>books-the:DET<br>floor-the:DET<br>floor-fourth:AMOD<br>wall-back:AMOD                          |
| 17    |   | railroad,clouds,bridge<br>train,tracks,light<br>railway,tracks,light<br>locomotive,bridge,track<br>ties,railroad,tracks         | tracks-train:NN<br>train-an:DET<br>tracks-train:NSUBJ<br>bridge-tracks:PREP_OVER<br>railroad-the:DET<br>tracks-railroad:NN<br>root-train:ROOT<br>train-the:DET<br>line-train:NN<br>poles-telephone:NN<br>crossing-river:PREP_OVER<br>looking-bridge:DOBJ<br>railway-the:DET<br>bridge-river:NN<br>goes-train:NSUBJ |
| 18    |  | phone,red,night<br>apartments,pool,swimming<br>judge,book,history<br>british,architecture,building<br>entrance,red,blue         | corner-the:DET<br>frames-window:NN<br>street-an:DET<br>house-house:DEP<br>house-family:NN<br>house-carriage:NN<br>week-the:DET<br>design-the:DET<br>house-cool:AMOD<br>system-water:NN<br>house-big:AMOD<br>level-street:NN<br>doors-blue:AMOD<br>port-car:NN<br>house-town:PREP_IN                                |

Continued on next page

**Table1 – continued from previous page**

| Index                  | Image                                                                               | NUS-WIDE Concepts                                                                                                                       | SBU Concepts                                                                                                                                                                                                                                                                                                                                               |
|------------------------|-------------------------------------------------------------------------------------|-----------------------------------------------------------------------------------------------------------------------------------------|------------------------------------------------------------------------------------------------------------------------------------------------------------------------------------------------------------------------------------------------------------------------------------------------------------------------------------------------------------|
| 19                     |    | downtown,building,blue<br>buildings,building,travel<br>spain,europa,europe<br>hotel,night,lights<br>maryland,architecture,buildings     | root-buildings:ROOT<br>building-huge:AMOD<br>buildings-office:NN<br>view-building:PREP_OF<br>buildings-the:DET<br>towers-the:DET<br>roof-building:PREP_OF<br>chimney-the:DET<br>building-new:NN<br>building-center:PREP_IN<br>root-towers:ROOT<br>building-interesting:AMOD<br>building-front:PREP_IN<br>building-government:NN<br>building-roof:PREP_WITH |
| 20                     |   | shops,architecture,night<br>shop,architecture,mall<br>bazaar,iran,light<br>shopping,architecture,building<br>shrine,architecture,church | corridor-the:DET<br>corridor-a:DET<br>root-street:ROOT<br>town-old:AMOD<br>street-wall:NN<br>root-corridor:ROOT<br>street-side:NN<br>street-market:NN<br>market-old:AMOD<br>hall-main:AMOD<br>street-city:NN<br>end-street:PREP_OF<br>market-christmas:NN<br>building-market:NN<br>sides-both:DET                                                          |
| 21                     |  | phone,red,night<br>telephones,night,red<br>door,windows,house<br>windows,house,green<br>post,night,street                               | box-red:AMOD<br>booth-phone:NN<br>boxes-red:AMOD<br>boxes-telephone:NN<br>box-telephone:NN<br>boxes-phone:NN<br>root-boxes:ROOT<br>booth-red:AMOD<br>door-red:AMOD<br>root-telephone:ROOT<br>doors-red:AMOD<br>box-phone:NN<br>window-red:AMOD<br>door-building:PREP_ON<br>sign-neon:NN                                                                    |
| Continued on next page |                                                                                     |                                                                                                                                         |                                                                                                                                                                                                                                                                                                                                                            |



**Table1 – continued from previous page**

| Index                  | Image                                                                               | NUS-WIDE Concepts                                                                                                                     | SBU Concepts                                                                                                                                                                                                                                                                                                                            |
|------------------------|-------------------------------------------------------------------------------------|---------------------------------------------------------------------------------------------------------------------------------------|-----------------------------------------------------------------------------------------------------------------------------------------------------------------------------------------------------------------------------------------------------------------------------------------------------------------------------------------|
| 22                     |    | house,architecture,historic<br>cross,church,religion<br>chapel,buildings,design<br>home,architecture,door<br>houses,building,historic | house-red:AMOD<br>building-church:NN<br>house-neighborhood:PREP_IN<br>house-pink:AMOD<br>house-town:PREP_IN<br>house-school:NN<br>house-little:AMOD<br>root-house:ROOT<br>building-little:AMOD<br>house-beach:PREP_NEAR<br>roof-tin:NN<br>doors-red:AMOD<br>lived-house:PREP_IN<br>house-big:AMOD<br>one-houses:PREP_OF                 |
| 23                     |   | bridge,bridges,architecture<br>wales,trees,explore<br>bridges,trees,nature<br>canal,night,river<br>waterfall,mountains,california     | root-bridge:ROOT<br>built-bridge:NSUBJ<br>bridge-old:AMOD<br>bridge-over:PRT<br>road-bridge:DEP<br>bridge-an:DET<br>root-arch:ROOT<br>bridge-road:NN<br>bridge-arch:NN<br>water-bridge:PREP_UNDER<br>bridge-bridge:DEP<br>bridge-railway:NN<br>bridge-water:DOBJ<br>bridge-train:NN<br>train-bridge:DOBJ                                |
| 24                     |  | dock,sunset,bay<br>waterways,night,light<br>lake,trees,boat<br>water,boat,river<br>reflection,night,river                             | crossing-river:PREP_OVER<br>rhine-the:DET<br>view-lake:PREP_OF<br>river-bridge:CONJ_AND<br>taken-train:PREP_FROM<br>side-river:PREP_OF<br>bridge-rainbow:NN<br>view-boat:PREP_FROM<br>plant-power:NN<br>water-still:AMOD<br>reflection-bridge:PREP_OF<br>eye-london:NN<br>ride-river:PREP_ON<br>middle-lake:PREP_OF<br>taken-view:NSUBJ |
| Continued on next page |                                                                                     |                                                                                                                                       |                                                                                                                                                                                                                                                                                                                                         |



**Table1 – continued from previous page**

| Index | Image                                                                               | NUS-WIDE Concepts                                                                                                                      | SBU Concepts                                                                                                                                                                                                                                                                                                      |
|-------|-------------------------------------------------------------------------------------|----------------------------------------------------------------------------------------------------------------------------------------|-------------------------------------------------------------------------------------------------------------------------------------------------------------------------------------------------------------------------------------------------------------------------------------------------------------------|
| 25    |    | furniture, chairs, retro<br>floor, window, interior<br>retro, modern, furniture<br>design, interior, furniture<br>bench, winter, snow  | table-pool:NN<br>table-room:PREP_IN<br>table-chairs:CONJ_AND<br>table-side:NN<br>floor-wood:NN<br>floor-new:AMOD<br>bedroom-house:PREP_OF<br>room-front:AMOD<br>root-installation:ROOT<br>table-house:PREP_IN<br>bed-house:PREP_IN<br>root-tables:ROOT<br>area-bar:NN<br>kitchen-sink:DEP<br>carpet-the:DET       |
| 26    |   | shops, fun, florida<br>hospital, people, california<br>historical, fun, traditional<br>bazaar, street, muslim<br>shrine, people, tokyo | dress-wedding:NN<br>market-market:APPOS<br>bags-sand:NN<br>system-water:NN<br>market-fish:NN<br>market-biggest:AMOD<br>fish-wholesale:AMOD<br>tuna-market:PREP_AT<br>animal-towel:NN<br>market-seafood:NN<br>market-wholesale:AMOD<br>fish-market:CONJ_AND<br>kitchen-a:DET<br>paper-toilet:NN<br>bottles-the:DET |
| 27    |  | beach, landscape, clouds<br>island, sand, islands<br>sand, waves, blue<br>desert, dunes, explore<br>australia, coast, ocean            | bar-sand:NN<br>beach-white:AMOD<br>beach-sand:NN<br>lake-salt:NN<br>beach-bay:PREP_IN<br>water-sand:CONJ_AND<br>sand-white:AMOD<br>water-warm:AMOD<br>beach-beautiful:AMOD<br>beach-island:PREP_IN<br>root-beach:ROOT<br>beach-coast:PREP_ON<br>beach-island:PREP_ON<br>beach-bay:NN<br>one-beaches:PREP_OF       |

Continued on next page

**Table1 – continued from previous page**

| Index                  | Image                                                                               | NUS-WIDE Concepts                                                                                                                    | SBU Concepts                                                                                                                                                                                                                                                                                                |
|------------------------|-------------------------------------------------------------------------------------|--------------------------------------------------------------------------------------------------------------------------------------|-------------------------------------------------------------------------------------------------------------------------------------------------------------------------------------------------------------------------------------------------------------------------------------------------------------|
| 28                     |    | court,sport,tennis<br>suits,girls,beach<br>wales,scotland,france<br>action,girl,motion<br>jump,cat,kitten                            | student-a:DET<br>event-the:DET<br>ball-basket:NN<br>video-music:NN<br>root-students:ROOT<br>field-soccer:NN<br>pants-red:AMOD<br>root-dude:ROOT<br>girl-dog:CONJ_AND<br>trying-catch:XCOMP<br>kid-shirt:PREP_IN<br>play-boys:NSUBJ<br>playing-ball:DOBJ<br>person-one:NUM<br>show-the:DET                   |
| 29                     |   | sports,football,game<br>cheering,girls,basketball<br>airport,travel,architecture<br>basketball,sunset,court<br>college,athlete,sport | ball-the:DET<br>root-play:ROOT<br>playing-ball:DOBJ<br>house-field:NN<br>store-apple:NN<br>play-boys:NSUBJ<br>game-a:DET<br>ball-basket:NN<br>build-to:AUX<br>reflections-window:PREP_IN<br>machine-flying:AMOD<br>lobby-building:PREP_OF<br>root-reflections:ROOT<br>floor-a:DET<br>floor-glass:NN         |
| 30                     |  | mountain,snow,winter<br>snow,mountain,clouds<br>ice,blue,glacier<br>mountains,winter,mountain<br>switzerland,snow,mountains          | floor-valley:NN<br>road-mountain:PREP_OVER<br>root-snow:ROOT<br>winds-the:DET<br>root-valley:ROOT<br>root-formations:ROOT<br>pass-mountain:NN<br>covered-snow:NSUBJ<br>falls-water:NSUBJ<br>rock-white:AMOD<br>root-canyon:ROOT<br>canyon-river:NN<br>mountains-rocky:NN<br>canyon-red:AMOD<br>camp-base:NN |
| Continued on next page |                                                                                     |                                                                                                                                      |                                                                                                                                                                                                                                                                                                             |

**Table1 – continued from previous page**

| Index | Image                                                                               | NUS-WIDE Concepts                                                                                                                     | SBU Concepts                                                                                                                                                                                                                                                                                                |
|-------|-------------------------------------------------------------------------------------|---------------------------------------------------------------------------------------------------------------------------------------|-------------------------------------------------------------------------------------------------------------------------------------------------------------------------------------------------------------------------------------------------------------------------------------------------------------|
| 31    |    | tollbooth,car,lights<br>door, windows, house<br>concrete, car, cars<br>belgium, abandoned, castle<br>doorway, red, abandoned          | door-entrance:NN<br>door-floor:PREP_IN<br>window-floor:NN<br>panel-the:DET<br>floor-upper:AMOD<br>part-house:PREP_OF<br>upstairs-the:DET<br>frame-door:NN<br>door-front:NN<br>window-street:PREP_ON<br>view-window:PREP_OF<br>windows-floor:NN<br>root-staircase:ROOT<br>door-side:NN<br>building-church:NN |
| 32    |   | design, interior, furniture<br>home, interior, design<br>work, office, apple<br>office, apple, mac<br>mac, office, photography        | root-desk:ROOT<br>desk-room:PREP_IN<br>desk-office:PREP_IN<br>desk-computer:NN<br>desk-a:DET<br>room-guest:NN<br>root-computer:ROOT<br>desk-the:DET<br>root-room:ROOT<br>tables-the:DET<br>kitchen-a:DET<br>root-designs:ROOT<br>table-window:PREP_BY<br>room-computer:NN<br>kitchen-house:NN               |
| 33    |  | apartments, buildings, city<br>textures, abstract, green<br>ties, colour, red<br>geometry, glass, windows<br>pattern, explore, yellow | wall-building:PREP_IN<br>towers-office:NN<br>blue-dark:AMOD<br>root-wall:ROOT<br>texture-the:DET<br>pane-window:NN<br>christmas-tree:DEP<br>fence-iron:NN<br>root-drops:ROOT<br>lights-white:AMOD<br>trees-birch:AMOD<br>in-wall:POBJ<br>dots-white:AMOD<br>shadow-a:DET<br>root-abstract:ROOT              |

Continued on next page

**Table1 – continued from previous page**

| Index                  | Image                                                                               | NUS-WIDE Concepts                                                                                                                                  | SBU Concepts                                                                                                                                                                                                                                                                                                              |
|------------------------|-------------------------------------------------------------------------------------|----------------------------------------------------------------------------------------------------------------------------------------------------|---------------------------------------------------------------------------------------------------------------------------------------------------------------------------------------------------------------------------------------------------------------------------------------------------------------------------|
| 34                     |    | house,architecture,historic<br>houses,building,historic<br>maryland,architecture,buildings<br>building,church,europe<br>structure,buildings,clouds | looks-house:NSUBJ<br>house-street:PREP_ACROSS<br>house-beach:PREP_NEAR<br>cute-house:DOBJ<br>house-wooden:AMOD<br>house-lived:RCMOD<br>house-house:DEP<br>building-house:NN<br>house-pink:AMOD<br>window-top:AMOD<br>house-typical:AMOD<br>beach-house:DEP<br>house-school:NN<br>row-houses:PREP_OF<br>building-church:NN |
| 35                     |   | pole,power,sunset<br>tornado,clouds,night<br>polaroid,marsh,landscape<br>sky,plane,white<br>sailboat,ship,blue                                     | taken-window:PREP_OUT<br>root-lines:ROOT<br>root-wind:ROOT<br>root-jet:ROOT<br>sailboat-a:DET<br>sign-sky:PREP_IN<br>view-window:NN<br>blue-clear:AMOD<br>change-the:DET<br>gulf-the:DET<br>view-car:PREP_FROM<br>wires-the:DET<br>shape-a:DET<br>ocean-blue:AMOD<br>bridge-fog:PREP_IN                                   |
| 36                     |  | car,racing,race<br>race,car,auto<br>cars,racing,classic<br>formula,historic,classic<br>vehicle,cars,speed                                          | spotted-car:NSUBJ<br>car-blue:AMOD<br>car-field:PREP_IN<br>car-rental:AMOD<br>root-car:ROOT<br>car-little:AMOD<br>car-toy:NN<br>held-warehouse:PREP_IN<br>stuck-sand:PREP_IN<br>warehouse-red:AMOD<br>car-french:AMOD<br>warehouse-brick:NN<br>car-the:DET<br>pick-up:PRT<br>car-green:AMOD                               |
| Continued on next page |                                                                                     |                                                                                                                                                    |                                                                                                                                                                                                                                                                                                                           |



Table1 – continued from previous page

| Index | Image                                                                               | NUS-WIDE Concepts                                                                                                           | SBU Concepts                                                                                                                                                                                                                                                                                                         |
|-------|-------------------------------------------------------------------------------------|-----------------------------------------------------------------------------------------------------------------------------|----------------------------------------------------------------------------------------------------------------------------------------------------------------------------------------------------------------------------------------------------------------------------------------------------------------------|
| 37    |    | countryside,clouds,green<br>shadows,sky,clouds<br>trees,mountains,clouds<br>plants,trees,tree<br>ancient,tree,city          | clock-flower:NN<br>highlands-the:DET<br>district-lake:NN<br>field-front:PREP_IN<br>hill-small:AMOD<br>walls-stone:NN<br>green-so:ADVMOD<br>root-gardens:ROOT<br>road-brick:NN<br>trees-plants:CONJ_AND<br>house-country:NN<br>green-the:DET<br>plants-trees:CONJ_AND<br>bridge-stone:NN<br>root-grass:ROOT           |
| 38    |   | stream,trees,sky<br>trail,forest,trees<br>scenic,river,beautiful<br>creek,green,forest<br>river,waterfall,landscape         | root-trail:ROOT<br>root-hike:ROOT<br>mountains-blue:AMOD<br>pine-tree:DOBJ<br>tree-road:PREP_IN<br>up-mountain:POBJ<br>trees-flowers:CONJ_AND<br>root-path:ROOT<br>down-mountain:POBJ<br>forest-mountain:NN<br>grow-trees:NSUBJ<br>mountain-green:AMOD<br>tree-center:PREP_IN<br>trails-the:DET<br>road-winding:AMOD |
| 39    |  | mountain,snow,winter<br>snow,mountain,clouds<br>mountains,winter,mountain<br>switzerland,snow,mountains<br>ice,blue,glacier | mountain-a:DET<br>mountain-highest:AMOD<br>alps-the:DET<br>camp-base:NN<br>mountain-the:DET<br>pass-mountain:NN<br>root-mountain:ROOT<br>crater-the:DET<br>summit-the:DET<br>peak-the:DET<br>tops-mountain:NN<br>root-peak:ROOT<br>feet-:NUM<br>mountain-table:NN<br>top-mountain:PREP_OF                            |

Continued on next page



**Table1 – continued from previous page**

| Index                  | Image                                                                               | NUS-WIDE Concepts                                                                                                                | SBU Concepts                                                                                                                                                                                                                                                                                    |
|------------------------|-------------------------------------------------------------------------------------|----------------------------------------------------------------------------------------------------------------------------------|-------------------------------------------------------------------------------------------------------------------------------------------------------------------------------------------------------------------------------------------------------------------------------------------------|
| 40                     |    | army,mountains,abandoned<br>colorado,landscape,clouds<br>rocks,blue,mountains<br>desert,utah,mountains<br>canyon,utah,sky        | canyon-river:NN<br>canyon-grand:AMOD<br>canyon-the:DET<br>rock-volcanic:AMOD<br>field-lava:NN<br>crater-the:DET<br>root-canyon:ROOT<br>root-cliffs:ROOT<br>floor-valley:NN<br>side-hill:NN<br>river-colorado:NN<br>beach-green:AMOD<br>rocks-black:AMOD<br>formations-the:DET<br>root-dirt:ROOT |
| 41                     |   | square,portrait,china<br>desert,portrait,california<br>october,people,portrait<br>religion,people,portrait<br>trip,summer,people | family-the:DET<br>dude-the:DET<br>party-the:DET<br>bottle-wine:PREP_OF<br>girl-jacket:PREP_IN<br>root-women:ROOT<br>me-shirt:PREP_IN<br>in-mirror:POBJ<br>band-the:DET<br>riding-cars:PREP_IN<br>root-guy:ROOT<br>water-holy:AMOD<br>dressed-black:PREP_IN<br>shirt-the:DET<br>girl-black:AMOD  |
| 42                     |  | ruins,asia,decay<br>leaves,trees,fall<br>needles,sky,water<br>fence,grass,field<br>temple,church,india                           | root-forest:ROOT<br>fence-stone:NN<br>root-trail:ROOT<br>trees-pine:AMOD<br>forest-pine:AMOD<br>mountains-white:AMOD<br>space-green:AMOD<br>forest-a:DET<br>forest-tree:NN<br>tree-young:AMOD<br>trees-tall:AMOD<br>fence-old:AMOD<br>root-yard:ROOT<br>fell-tree:NSUBJ<br>creek-the:DET        |
| Continued on next page |                                                                                     |                                                                                                                                  |                                                                                                                                                                                                                                                                                                 |

Table1 – continued from previous page

| Index | Image                                                                               | NUS-WIDE Concepts                                                                                                         | SBU Concepts                                                                                                                                                                                                                                                                                                                              |
|-------|-------------------------------------------------------------------------------------|---------------------------------------------------------------------------------------------------------------------------|-------------------------------------------------------------------------------------------------------------------------------------------------------------------------------------------------------------------------------------------------------------------------------------------------------------------------------------------|
| 43    |    | colorful,light,colourful<br>ties,colour,red<br>dress,handmade,sewing<br>clothes,baby,handmade<br>shops,shop,france        | root-dress:ROOT<br>girls-dress:PREP_IN<br>dress-window:PREP_IN<br>dress-the:DET<br>lady-dress:PREP_IN<br>pink-blue:CONJ_AND<br>window-street:PREP_ON<br>dress-vintage:AMOD<br>variety-a:DET<br>clothes-the:DET<br>root-towel:ROOT<br>blue-pink:CONJ_AND<br>display-a:DET<br>girls-dresses:PREP_IN<br>dress-traditional:AMOD               |
| 44    |   | water,landscape,lake<br>alaska,mountains,glacier<br>river,waterfall,landscape<br>island,landscape,sky<br>stream,trees,sky | lake-mountain:NN<br>lake-house:PREP_NEAR<br>lake-background:PREP_IN<br>standing-bridge:PREP_ON<br>mountain-blue:AMOD<br>dam-the:DET<br>looking-river:PREP_OVER<br>root-flood:ROOT<br>river-background:PREP_IN<br>water-still:AMOD<br>river-house:PREP_BY<br>river-missouri:NN<br>root-lake:ROOT<br>lake-beautiful:AMOD<br>root-water:ROOT |
| 45    |  | golf,car,auto<br>foals,horse,mare<br>animal,dog,wild<br>mare,nature,fish<br>perfect,great,art                             | house-dog:NN<br>bag-sleeping:AMOD<br>roots-tree:NN<br>tent-the:DET<br>roots-the:DET<br>bag-the:DET<br>wheel-water:NN<br>view-rear:AMOD<br>animals-many:AMOD<br>wildlife-the:DET<br>tent-a:DET<br>root-camp:ROOT<br>ago-weeks:NPADVMOD<br>park-castle:NN<br>front-car:PREP_OF                                                              |

Continued on next page

**Table1 – continued from previous page**

| Index | Image                                                                               | NUS-WIDE Concepts                                                                                               | SBU Concepts                                                                                                                                                                                                                                                                                              |
|-------|-------------------------------------------------------------------------------------|-----------------------------------------------------------------------------------------------------------------|-----------------------------------------------------------------------------------------------------------------------------------------------------------------------------------------------------------------------------------------------------------------------------------------------------------|
| 46    |    | morning,people,coffee<br>trip,summer,people<br>health,red,white<br>sewing,room,studio<br>university,girl,people | paper-the:DET<br>book-a:DET<br>table-train:NN<br>shelves-the:DET<br>class-the:DET<br>girls-kitchen:PREP_IN<br>book-new:AMOD<br>books-the:DET<br>classroom-the:DET<br>me-shirt:PREP_IN<br>shirt-white:AMOD<br>root-signs:ROOT<br>student-a:DET<br>books-library:PREP_IN<br>display-window:NN               |
| 47    |   | farm,landscape,blue<br>cows,trees,grass<br>cow,landscape,clouds<br>land,farm,grass<br>hill,italy,italia         | root-sheep:ROOT<br>cows-field:PREP_IN<br>sheep-the:DET<br>sheep-field:PREP_IN<br>horses-field:PREP_IN<br>grazing-field:PREP_IN<br>field-front:PREP_IN<br>field-cow:NN<br>root-horses:ROOT<br>pasture-a:DET<br>cow-the:DET<br>root-pasture:ROOT<br>horse-field:PREP_IN<br>field-soccer:NN<br>root-cow:ROOT |
| 48    |  | restaurant,street,people<br>shops,urban,japan<br>mall,shop,ontario<br>windows,people,clouds<br>bar,city,cafe    | root-bar:ROOT<br>bar-the:DET<br>station-a:DET<br>street-city:NN<br>windows-floor:NN<br>display-window:NN<br>floor-top:AMOD<br>house-tea:NN<br>root-reads:ROOT<br>family-the:DET<br>root-tables:ROOT<br>house-traditional:AMOD<br>floor-third:AMOD<br>street-shopping:NN<br>root-underneath:ROOT           |

Continued on next page



Table1 – continued from previous page

| Index                  | Image                                                                               | NUS-WIDE Concepts                                                                                                                  | SBU Concepts                                                                                                                                                                                                                                                                                                |
|------------------------|-------------------------------------------------------------------------------------|------------------------------------------------------------------------------------------------------------------------------------|-------------------------------------------------------------------------------------------------------------------------------------------------------------------------------------------------------------------------------------------------------------------------------------------------------------|
| 49                     |    | chairs,interior,office<br>classroom,california,apple<br>greece,boats,boat<br>design,interior,furniture<br>interior,furniture,house | root-chairs:ROOT<br>tables-chairs:CONJ_AND<br>tables-the:DET<br>chairs-the:DET<br>table-chairs:CONJ_AND<br>root-tables:ROOT<br>lab-computer:NN<br>root-seats:ROOT<br>lounge-the:DET<br>chairs-lounge:NN<br>classroom-a:DET<br>classroom-the:DET<br>lab-the:DET<br>village-fishing:NN<br>house-house:DEP     |
| 50                     |   | painting,artist,colors<br>fisheye,architecture,city<br>mural,explore,architecture<br>entertainment,city,funny<br>colors,night,city | colorful-very:ADVMOD<br>ship-bottle:PREP_IN<br>decoration-a:DET<br>town-beach:NN<br>ship-pirate:AMOD<br>church-catholic:AMOD<br>ship-old:AMOD<br>root-ship:ROOT<br>root-houses:ROOT<br>ship-the:DET<br>glass-stained:NN<br>house-beautiful:AMOD<br>street-main:NN<br>house-big:AMOD<br>row-houses:PREP_OF   |
| 51                     |  | trip,architecture,tourism<br>tourist,temple,portugal<br>palace,madrid,night<br>heritage,trip,church<br>bridge,trees,landscape      | root-palace:ROOT<br>castle-the:DET<br>built-century:PREP_IN<br>root-castle:ROOT<br>root-temple:ROOT<br>century-the:DET<br>castle-a:DET<br>century-17th:AMOD<br>view-castle:PREP_OF<br>palace-summer:NN<br>houses-built:VMOD<br>temple-a:DET<br>castle-hill:PREP_ON<br>has-house:NSUBJ<br>bridge-oldest:AMOD |
| Continued on next page |                                                                                     |                                                                                                                                    |                                                                                                                                                                                                                                                                                                             |

Table1 – continued from previous page

| Index                  | Image                                                                               | NUS-WIDE Concepts                                                                                                        | SBU Concepts                                                                                                                                                                                                                                                                                                            |
|------------------------|-------------------------------------------------------------------------------------|--------------------------------------------------------------------------------------------------------------------------|-------------------------------------------------------------------------------------------------------------------------------------------------------------------------------------------------------------------------------------------------------------------------------------------------------------------------|
| 52                     |    | work,office,apple<br>home,interior,design<br>modern,interior,furniture<br>design,interior,furniture<br>chair,room,office | root-desk:ROOT<br>root-room:ROOT<br>kitchen-a:DET<br>box-yellow:AMOD<br>area-office:NN<br>table-window:PREP_BY<br>desk-office:PREP_IN<br>bedroom-house:PREP_IN<br>kitchen-house:PREP_IN<br>kitchen-house:NN<br>table-kitchen:PREP_IN<br>basement-the:DET<br>market-biggest:AMOD<br>root-guest:ROOT<br>chair-orange:AMOD |
| 53                     |   | roadblock,protest,london<br>army,mountains,abandoned<br>uniform,world,historic<br>golf,spain,flag<br>refugees,girl,boy   | root-yard:ROOT<br>space-green:AMOD<br>people-many:AMOD<br>root-flood:ROOT<br>trees-fruit:NN<br>house-field:NN<br>plant-tree:DOBJ<br>trees-flowers:CONJ_AND<br>sign-middle:PREP_IN<br>field-ball:NN<br>tree-road:PREP_IN<br>area-water:NN<br>street-house:PREP_OF<br>house-built:VMOD<br>trees-plant:NN                  |
| 54                     |  | boat,lake,blue<br>canal,houseboat,barge<br>barge,france,scotland<br>nsw,coast,signs<br>sailing,california,sky            | boat-harbor:PREP_IN<br>boat-water:PREP_IN<br>boat-cruise:NN<br>bow-the:DET<br>boats-many:AMOD<br>boats-fishing:NN<br>lock-the:DET<br>port-the:DET<br>one-boats:PREP_OF<br>boat-tour:NN<br>boat-blue:AMOD<br>put-water:PREP_IN<br>boats-wooden:AMOD<br>cruise-the:DET<br>boat-river:NN                                   |
| Continued on next page |                                                                                     |                                                                                                                          |                                                                                                                                                                                                                                                                                                                         |



**Table1 – continued from previous page**

| Index                  | Image                                                                               | NUS-WIDE Concepts                                                                                                                                               | SBU Concepts                                                                                                                                                                                                                                                                                                                                                      |
|------------------------|-------------------------------------------------------------------------------------|-----------------------------------------------------------------------------------------------------------------------------------------------------------------|-------------------------------------------------------------------------------------------------------------------------------------------------------------------------------------------------------------------------------------------------------------------------------------------------------------------------------------------------------------------|
| 55                     |    | <p>pacific,waves,nature<br/> coast,nature,rocks<br/> waves,rocks,coast<br/> australia,coast,ocean<br/> beach,landscape,clouds</p>                               | <p>root-beach:ROOT<br/> beach-private:AMOD<br/> down-beach:PREP_TO<br/> beach-the:DET<br/> sand-a:DET<br/> ocean-pacific:AMOD<br/> beach-coast:PREP_ON<br/> beach-small:AMOD<br/> beach-sand:NN<br/> coast-east:AMOD<br/> sands-white:AMOD<br/> rocks-white:AMOD<br/> view-water:PREP_OF<br/> view-beach:PREP_FROM<br/> waves-the:DET</p>                         |
| 56                     |   | <p>airport,travel,architecture<br/> underground,people,street<br/> glass,green,water<br/> cafe,bar,street<br/> windows,people,clouds</p>                        | <p>house-field:NN<br/> hall-main:AMOD<br/> area-floor:NN<br/> floor-top:AMOD<br/> store-apple:NN<br/> student-a:DET<br/> floor-ground:NN<br/> root-corridor:ROOT<br/> corridor-the:DET<br/> children-the:DET<br/> door-dag:DEP<br/> lodge-the:DET<br/> floor-upper:AMOD<br/> seats-the:DET<br/> floor-third:AMOD</p>                                              |
| 57                     |  | <p>interior,furniture,house<br/> furniture,architecture,interior<br/> design,interior,furniture<br/> modern,interior,furniture<br/> kitchen,interior,design</p> | <p>living-room:DOBJ<br/> room-family:NN<br/> house-bedroom:AMOD<br/> window-big:AMOD<br/> room-house:PREP_IN<br/> kitchen-house:PREP_IN<br/> looking-room:PREP_INTO<br/> tables-chairs:CONJ_AND<br/> room-kitchen:CONJ_AND<br/> root-bedroom:ROOT<br/> dining-room:DOBJ<br/> door-looking:VMOD<br/> leads-door:NSUBJ<br/> root-guest:ROOT<br/> house-new:AMOD</p> |
| Continued on next page |                                                                                     |                                                                                                                                                                 |                                                                                                                                                                                                                                                                                                                                                                   |

Table1 – continued from previous page

| Index                  | Image                                                                               | NUS-WIDE Concepts                                                                                                                     | SBU Concepts                                                                                                                                                                                                                                                                                                                                                 |
|------------------------|-------------------------------------------------------------------------------------|---------------------------------------------------------------------------------------------------------------------------------------|--------------------------------------------------------------------------------------------------------------------------------------------------------------------------------------------------------------------------------------------------------------------------------------------------------------------------------------------------------------|
| 58                     |    | restaurant,street,people<br>cafe,bar,street<br>store,people,street<br>shop,sign,night<br>bar,city,cafe                                | root-bar:ROOT<br>area-bar:NN<br>bar-a:DET<br>bar-little:AMOD<br>collection-the:DET<br>bar-an:DET<br>office-box:NN<br>fireplace-the:DET<br>tables-chairs:CONJ_AND<br>root-store:ROOT<br>wall-bar:PREP_IN<br>room-main:AMOD<br>place-market:NN<br>lobby-the:DET<br>root-stain:ROOT                                                                             |
| 59                     |   | president,photo,art<br>airforce,vietnam,navy<br>roadblock,protest,london<br>mountains,river,lake<br>india,landscape,sunset            | mountain-blue:AMOD<br>root-team:ROOT<br>lake-background:PREP_IN<br>pants-black:AMOD<br>girls-front:PREP_IN<br>root-family:ROOT<br>standing-'re:AUX<br>shirt-white:AMOD<br>jacket-black:AMOD<br>mountain-distance:PREP_IN<br>people-standing:VMOD<br>pants-the:DET<br>tour-bike:NN<br>ride-bus:NN<br>walking-road:DOBJ                                        |
| 60                     |  | maryland,architecture,buildings<br>facade,church,night<br>houses,building,historic<br>historic,house,texas<br>tourist,temple,portugal | building-historic:AMOD<br>houses-building:NSUBJ<br>houses-now:ADVMOD<br>house-building:DEP<br>across-street:POBJ<br>looks-building:NSUBJ<br>row-houses:PREP_OF<br>building-style:NN<br>building-built:VMOD<br>had-building:NSUBJ<br>building-houses:RCMOD<br>has-building:NSUBJ<br>built-building:NSUBJPASS<br>building-large:AMOD<br>building-front:PREP_IN |
| Continued on next page |                                                                                     |                                                                                                                                       |                                                                                                                                                                                                                                                                                                                                                              |

**Table1 – continued from previous page**

| Index | Image                                                                               | NUS-WIDE Concepts                                                                                                          | SBU Concepts                                                                                                                                                                                                                                                                                                                                         |
|-------|-------------------------------------------------------------------------------------|----------------------------------------------------------------------------------------------------------------------------|------------------------------------------------------------------------------------------------------------------------------------------------------------------------------------------------------------------------------------------------------------------------------------------------------------------------------------------------------|
| 61    |    | mountains,trees,water<br>mountain,lake,green<br>forest,mountains,clouds<br>pakistan,snow,blue<br>alaska,mountains,glacier  | lake-beautiful:AMOD<br>lake-mountain:NN<br>lake-mountains:PREP_IN<br>range-mountain:NN<br>mountains-green:AMOD<br>forest-national:AMOD<br>alps-the:DET<br>mountains-rocky:NN<br>road-winding:AMOD<br>mountains-white:AMOD<br>floor-valley:NN<br>mountain-a:DET<br>mountain-distance:PREP_IN<br>view-mountain:PREP_OF<br>mountains-background:PREP_IN |
| 62    |   | library,explore,interestingness<br>toys,display,home<br>store,food,color<br>shopping,bazaar,japan<br>book,library,color    | books-the:DET<br>root-books:ROOT<br>shelf-book:NN<br>shelves-the:DET<br>display-window:NN<br>section-the:DET<br>window-shop:PREP_OF<br>display-the:DET<br>books-library:PREP_IN<br>wall-house:PREP_IN<br>station-bus:NN<br>store-book:NN<br>case-the:DET<br>display-window:PREP_IN<br>children-the:DET                                               |
| 63    |  | home,interior,design<br>kitchen,woman,self<br>classroom,california,apple<br>design,interior,furniture<br>work,office,apple | kitchen-a:DET<br>wall-bar:PREP_IN<br>shop-shoe:NN<br>area-bar:NN<br>kitchen-house:PREP_OF<br>counter-the:DET<br>display-the:DET<br>display-window:PREP_IN<br>stove-kitchen:PREP_IN<br>shelves-the:DET<br>fireplace-the:DET<br>kitchen-house:NN<br>desk-office:NN<br>stove-house:PREP_IN<br>kitchen-house:PREP_IN                                     |

Continued on next page

**Table1 – continued from previous page**

| Index                  | Image                                                                               | NUS-WIDE Concepts                                                                                                         | SBU Concepts                                                                                                                                                                                                                                                                                                                                 |
|------------------------|-------------------------------------------------------------------------------------|---------------------------------------------------------------------------------------------------------------------------|----------------------------------------------------------------------------------------------------------------------------------------------------------------------------------------------------------------------------------------------------------------------------------------------------------------------------------------------|
| 64                     |    | submarine,ocean,blue<br>wings,bird,sky<br>runway,flight,aviation<br>boat,lake,blue<br>pair,bird,birds                     | airplane-a:DET<br>putting-water:PREP_IN<br>surface-the:DET<br>root-seagulls:ROOT<br>ship-the:DET<br>bow-the:DET<br>cruise-the:DET<br>boat-white:AMOD<br>water-blue:AMOD<br>catch-fish:DOBJ<br>fisherman-a:DET<br>ships-the:DET<br>machine-flying:AMOD<br>taken-pictures:NSUBJPASS<br>boats-the:DET                                           |
| 65                     |   | desert,utah,mountains<br>india,landscape,sunset<br>war,ship,history<br>alaska,mountains,glacier<br>cactus,desert,arizona  | hillside-the:DET<br>side-hill:NN<br>building-white:AMOD<br>fork-the:DET<br>mountain-background:PREP_IN<br>mountain-rock:NN<br>looking-river:PREP_OVER<br>hill-background:PREP_IN<br>building-fence:DOBJ<br>root-valley:ROOT<br>houses-the:DET<br>mountains-background:PREP_IN<br>road-new:AMOD<br>distance-far:AMOD<br>view-castle:PREP_FROM |
| 66                     |  | home,interior,design<br>decoration,home,room<br>interior,furniture,house<br>room,design,home<br>modern,interior,furniture | root-bedroom:ROOT<br>bedroom-house:PREP_IN<br>bed-bedroom:PREP_IN<br>bed-queen:NN<br>room-kitchen:CONJ_AND<br>bedroom-house:PREP_OF<br>living-room:DOBJ<br>root-room:ROOT<br>bed-size:NN<br>has-bedroom:NSUBJ<br>bedroom-the:DET<br>room-sitting:AMOD<br>bed-house:PREP_IN<br>suite-the:DET<br>standing-door:PREP_IN                         |
| Continued on next page |                                                                                     |                                                                                                                           |                                                                                                                                                                                                                                                                                                                                              |



**Table1 – continued from previous page**

| Index                  | Image                                                                               | NUS-WIDE Concepts                                                                                                        | SBU Concepts                                                                                                                                                                                                                                                                                        |
|------------------------|-------------------------------------------------------------------------------------|--------------------------------------------------------------------------------------------------------------------------|-----------------------------------------------------------------------------------------------------------------------------------------------------------------------------------------------------------------------------------------------------------------------------------------------------|
| 67                     |    | bridges,trees,nature<br>roadblock,water,tree<br>waterways,marsh,landscape<br>lake,trees,boat<br>army,mountains,abandoned | one-house:NSUBJ<br>has-house:NSUBJ<br>root-land:ROOT<br>water-flood:NN<br>root-flood:ROOT<br>bags-sand:NN<br>plant-treatment:NN<br>bridge-lake:DOBJ<br>cross-river:DOBJ<br>had-water:DOBJ<br>bridge-small:AMOD<br>wall-retaining:AMOD<br>bridge-car:NN<br>system-water:NN<br>grew-house:PREP_IN     |
| 68                     |   | handmade,paper,baby<br>design,illustration,shirt<br>moon,art,stars<br>dust,tree,mist<br>clothing,shirt,design            | covered-snow:PREP_IN<br>piece-a:DET<br>color-a:DET<br>white-green:CONJ_AND<br>root-crazy:ROOT<br>cake-white:AMOD<br>root-size:ROOT<br>base-a:DET<br>staff-the:DET<br>trash-the:DET<br>sheet-a:DET<br>design-a:DET<br>snow-the:DET<br>dresses-white:AMOD<br>shape-a:DET                              |
| 69                     |  | waves,rocks,coast<br>aerial,blue,sea<br>photo,sky,landscape<br>wave,sunset,sand<br>waterfall,mountains,california        | springs-hot:AMOD<br>reflection-clouds:PREP_OF<br>blue-water:NSUBJ<br>feet-:NUM<br>reflected-clouds:NSUBJ<br>falls-the:DET<br>falls-water:NSUBJ<br>wave-a:DET<br>town-cape:NN<br>water-sky:PREP_IN<br>lake-mountain:NN<br>shoe-horse:NN<br>falls-niagara:NN<br>shot-water:PREP_OF<br>surface-the:DET |
| Continued on next page |                                                                                     |                                                                                                                          |                                                                                                                                                                                                                                                                                                     |



Table1 – continued from previous page

| Index | Image                                                                               | NUS-WIDE Concepts                                                                                                                  | SBU Concepts                                                                                                                                                                                                                                                                                             |
|-------|-------------------------------------------------------------------------------------|------------------------------------------------------------------------------------------------------------------------------------|----------------------------------------------------------------------------------------------------------------------------------------------------------------------------------------------------------------------------------------------------------------------------------------------------------|
| 70    |    | field,flowers,yellow<br>gardens,trees,tree<br>tulip,color,orange<br>graphic,lines,black<br>aerial,city,germany                     | plants-tomato:NN<br>root-plants:ROOT<br>weeds-the:DET<br>plant-flowers:DOBJ<br>bed-front:PREP_IN<br>plant-small:AMOD<br>grow-to:AUX<br>beds-flower:NN<br>root-fence:ROOT<br>root-beds:ROOT<br>fence-old:AMOD<br>roof-green:AMOD<br>plants-trees:CONJ_AND<br>garden-little:AMOD<br>garden-water:NN        |
| 71    |   | shop,sign,night<br>phone,red,night<br>shops,urban,japan<br>store,people,street<br>restaurant,street,people                         | poster-a:DET<br>house-hill:PREP_IN<br>window-bar:PREP_OF<br>business-a:DET<br>store-grocery:NN<br>station-bus:NN<br>machine-vending:AMOD<br>sign-window:PREP_IN<br>shop-book:NN<br>pub-the:DET<br>house-public:AMOD<br>glass-old:AMOD<br>display-window:PREP_IN<br>office-main:AMOD<br>stand-fruit:NSUBJ |
| 72    |  | airport,travel,architecture<br>underground,people,street<br>telephones,office,room<br>store,people,street<br>floor>window,interior | floor-ground:NN<br>basement-the:DET<br>floor-the:DET<br>store-apple:NN<br>doors-the:DET<br>lab-computer:NN<br>children-the:DET<br>door-looking:VMOD<br>house-field:NN<br>standing-looking:DEP<br>system-the:DET<br>tables-chairs:CONJ_AND<br>wall-back:AMOD<br>floor-third:AMOD<br>lobby-the:DET         |

Continued on next page

Table1 – continued from previous page

| Index                  | Image                                                                               | NUS-WIDE Concepts                                                                                                | SBU Concepts                                                                                                                                                                                                                                                                                                             |
|------------------------|-------------------------------------------------------------------------------------|------------------------------------------------------------------------------------------------------------------|--------------------------------------------------------------------------------------------------------------------------------------------------------------------------------------------------------------------------------------------------------------------------------------------------------------------------|
| 73                     |    | green,forest,trees<br>trees,leaves,autumn<br>path,forest,trail<br>spring,trees,landscape<br>moss,trees,tree      | forest-the:DET<br>forest-a:DET<br>grass-lush:AMOD<br>forest-green:AMOD<br>green-very:ADV<br>tree-forest:PREP_IN<br>root-forest:ROOT<br>trees-park:PREP_IN<br>green-the:DET<br>forest-rain:NN<br>root-grass:ROOT<br>grown-has:AUX<br>trunks-tree:NN<br>trees-forest:PREP_IN<br>grass-trees:CONJ_AND                       |
| 74                     |   | shops,urban,japan<br>store,night,architecture<br>mall,shop,ontario<br>downtown,building,blue<br>coffee,city,shop | row-houses:PREP_OF<br>building-colorful:AMOD<br>building-yellow:AMOD<br>mall-shopping:NN<br>buildings-colorful:AMOD<br>building-station:NN<br>houses-colorful:AMOD<br>sign-white:AMOD<br>street-shopping:NN<br>town-beach:NN<br>root-store:ROOT<br>shops-the:DET<br>house-public:AMOD<br>centre-town:NN<br>root-bar:ROOT |
| 75                     |  | sand,landscape,clouds<br>dunes,clouds,sky<br>desert,dunes,explore<br>canoe,beach,sunset<br>dunes,aerial,wow      | dune-sand:NN<br>dunes-sand:NN<br>dune-the:DET<br>root-dunes:ROOT<br>sand-red:AMOD<br>beach-beautiful:AMOD<br>lake-salt:NN<br>beach-sandy:AMOD<br>valley-death:NN<br>desert-the:DET<br>lake-big:AMOD<br>road-long:AMOD<br>beach-little:AMOD<br>bed-lake:NN<br>wave-the:DET                                                |
| Continued on next page |                                                                                     |                                                                                                                  |                                                                                                                                                                                                                                                                                                                          |

Table1 – continued from previous page

| Index | Image                                                                               | NUS-WIDE Concepts                                                                                                          | SBU Concepts                                                                                                                                                                                                                                                                                                                                    |
|-------|-------------------------------------------------------------------------------------|----------------------------------------------------------------------------------------------------------------------------|-------------------------------------------------------------------------------------------------------------------------------------------------------------------------------------------------------------------------------------------------------------------------------------------------------------------------------------------------|
| 76    |    | house,architecture,historic<br>maui,flower,beach<br>cottage,trees,abandoned<br>path,clouds,sky<br>village,france,europe    | house-beautiful:AMOD<br>house-beach:PREP_BY<br>shot-house:PREP_OF<br>house-cute:AMOD<br>sits-house:NSUBJ<br>house-beach:PREP_NEAR<br>root-house:ROOT<br>house-cool:AMOD<br>house-lovely:AMOD<br>house-county:PREP_IN<br>century-17th:AMOD<br>house-middle:PREP_IN<br>house-building:NSUBJ<br>house-street:PREP_ACROSS<br>bed-breakfast:CONJ_AND |
| 77    |   | shopping,night,street<br>digital,europe,buildings<br>store,people,street<br>restaurant,street,people<br>agent,night,street | stage-the:DET<br>bar-little:AMOD<br>root-bar:ROOT<br>market-small:AMOD<br>guy-the:DET<br>market-book:NN<br>guy-shirt:PREP_IN<br>root-ladies:ROOT<br>buy-to:AUX<br>girl-pink:PREP_IN<br>root-books:ROOT<br>market-house:PREP_NEAR<br>beer-a:DET<br>store-the:DET<br>root-shrine:ROOT                                                             |
| 78    |  | room,design,home<br>design,interior,furniture<br>islam,asia,people<br>interior,furniture,house<br>cottage,vintage,pink     | room-living:AMOD<br>suite-the:DET<br>root-bathroom:ROOT<br>plan-floor:NN<br>bedroom-house:PREP_IN<br>room-great:AMOD<br>bedroom-a:DET<br>room-dining:NN<br>living-room:DOBJ<br>bedroom-master:NN<br>bedroom-house:PREP_OF<br>room-bed:NN<br>wall-back:AMOD<br>master-the:DET<br>white-blue:CONJ_AND                                             |

Continued on next page

**Table1 – continued from previous page**

| Index | Image                                                                               | NUS-WIDE Concepts                                                                                                                                | SBU Concepts                                                                                                                                                                                                                                                                                                                |
|-------|-------------------------------------------------------------------------------------|--------------------------------------------------------------------------------------------------------------------------------------------------|-----------------------------------------------------------------------------------------------------------------------------------------------------------------------------------------------------------------------------------------------------------------------------------------------------------------------------|
| 79    |    | interior,furniture,house<br>design,interior,furniture<br>modern,interior,furniture<br>kitchen,interior,design<br>furniture,architecture,interior | living-room:DOBJ<br>leads-door:NSUBJ<br>door-looking:VMOD<br>room-kitchen:CONJ_AND<br>dining-room:DOBJ<br>looking-room:PREP_INTO<br>room-family:NN<br>standing-door:PREP_IN<br>room-great:AMOD<br>room-dining:NN<br>looks-window:NSUBJ<br>room-living:AMOD<br>standing-room:PREP_IN<br>walls-green:AMOD<br>addition-the:DET |
| 80    |   | history,museum,historical<br>heritage,culture,travel<br>view>window,city<br>ship,sail,sailing<br>sails,sky,white                                 | chairs-beach:NN<br>machine-flying:AMOD<br>terrace-roof:NN<br>ship-an:DET<br>ship-tall:AMOD<br>sail-to:AUX<br>town-beach:NN<br>ship-a:DET<br>root-chairs:ROOT<br>umbrella-the:DET<br>house-beach:NN<br>construction-the:DET<br>root-sail:ROOT<br>sail-a:DET<br>ship-pirate:AMOD                                              |
| 81    |  | cabin,explore>window<br>bench,winter,snow<br>army,mountains,abandoned<br>hut,green,tree<br>war,ship,history                                      | house-dog:NN<br>house-house:DEP<br>house-tree:NN<br>built-house:NSUBJPASS<br>root-cabin:ROOT<br>house-pump:NN<br>system-water:NN<br>built-house:NSUBJ<br>house-lake:PREP_NEAR<br>house-traditional:AMOD<br>building-house:DOBJ<br>house-yard:PREP_IN<br>house-forest:PREP_IN<br>sits-house:NSUBJ<br>house-small:AMOD        |

Continued on next page



**Table1 – continued from previous page**

| Index                  | Image                                                                               | NUS-WIDE Concepts                                                                                                            | SBU Concepts                                                                                                                                                                                                                                                                                                         |
|------------------------|-------------------------------------------------------------------------------------|------------------------------------------------------------------------------------------------------------------------------|----------------------------------------------------------------------------------------------------------------------------------------------------------------------------------------------------------------------------------------------------------------------------------------------------------------------|
| 82                     |    | business,trip,river<br>stream,trees,sky<br>woods,landscape,sky<br>waterways,marsh,landscape<br>forest,mountains,clouds       | root-trail:ROOT<br>trees-green:AMOD<br>trees-pine:NN<br>fork-the:DET<br>root-forest:ROOT<br>road-county:PREP_IN<br>see-trees:DOBJ<br>plants-trees:CONJ_AND<br>trees-all:PREDET<br>bridge-arch:AMOD<br>house-trees:PREP_IN<br>trees-more:AMOD<br>farm-tree:NN<br>road-forest:NN<br>trees-forest:PREP_IN               |
| 83                     |   | sand,nature,desert<br>decoration,home,room<br>paper,writing,macro<br>university,austin,digital<br>stairs,white,red           | wall-kitchen:PREP_IN<br>floor-house:PREP_IN<br>paper-wall:NN<br>root-floor:ROOT<br>root-wall:ROOT<br>room-bed:NN<br>wall-house:PREP_IN<br>tile-the:DET<br>wall-bathroom:PREP_IN<br>cabinet-the:DET<br>floor-wooden:AMOD<br>bathtub-the:DET<br>wall-bedroom:PREP_IN<br>bedroom-master:NN<br>floor-room:PREP_IN        |
| 84                     |  | golf,spain,flag<br>lawn,house,architecture<br>army,mountains,abandoned<br>oilfield,kuwait,california<br>roadblock,water,tree | trees-fruit:NN<br>standing-tree:PREP_UNDER<br>surrounded-trees:AGENT<br>tree-mango:NN<br>trees-olive:AMOD<br>trees-three:NUM<br>house-middle:PREP_IN<br>yard-the:DET<br>house-distance:PREP_IN<br>yard-back:AMOD<br>trees-front:PREP_IN<br>house-cool:AMOD<br>driveway-the:DET<br>house-country:NN<br>house-field:NN |
| Continued on next page |                                                                                     |                                                                                                                              |                                                                                                                                                                                                                                                                                                                      |

**Table1 – continued from previous page**

| Index | Image                                                                               | NUS-WIDE Concepts                                                                                                        | SBU Concepts                                                                                                                                                                                                                                                                                         |
|-------|-------------------------------------------------------------------------------------|--------------------------------------------------------------------------------------------------------------------------|------------------------------------------------------------------------------------------------------------------------------------------------------------------------------------------------------------------------------------------------------------------------------------------------------|
| 85    |    | shops,urban,japan<br>bar,city,cafe<br>shop,sign,night<br>house>window,door<br>restaurant,street,people                   | root-bar:ROOT<br>quarter-french:AMOD<br>house-public:AMOD<br>house-town:PREP_IN<br>root-store:ROOT<br>says-sign:NSUBJ<br>pub-the:DET<br>stand-fruit:NSUBJ<br>door-windows:CONJ_AND<br>root-shrine:ROOT<br>shops-the:DET<br>shop-flower:NN<br>had-building:NSUBJ<br>house-house:DEP<br>doors-red:AMOD |
| 86    |   | morning,people,coffee<br>old,people,man<br>president,america,party<br>environment,rally,democrat<br>pope,portrait,people | me-shirt:PREP_IN<br>shirt-white:AMOD<br>dress-wedding:NN<br>in-shirt:POBJ<br>shirt-dress:NN<br>shirt-blue:AMOD<br>man-old:AMOD<br>boys-blue:PREP_IN<br>screen-tv:NN<br>office-box:NN<br>boy-girl:CONJ_AND<br>bar-floor:NN<br>market-fish:NN<br>video-a:DET<br>wearing-shirt:DOBJ                     |
| 87    |  | mountain,snow,winter<br>aerial,blue,sea<br>pacific,waves,nature<br>vacation,island,beach<br>health,travel,landscape      | sand-black:AMOD<br>ocean-pacific:AMOD<br>coast-west:AMOD<br>sands-white:AMOD<br>ship-the:DET<br>water-blue:AMOD<br>blue-water:NSUBJ<br>wave-the:DET<br>dots-black:AMOD<br>castle-sand:PREP_IN<br>seal-a:DET<br>view-ship:PREP_OF<br>down-beach:PREP_TO<br>lions-sea:NN<br>beach-pebble:AMOD          |

Continued on next page

**Table1 – continued from previous page**

| Index | Image                                                                               | NUS-WIDE Concepts                                                                                                            | SBU Concepts                                                                                                                                                                                                                                                                                                       |
|-------|-------------------------------------------------------------------------------------|------------------------------------------------------------------------------------------------------------------------------|--------------------------------------------------------------------------------------------------------------------------------------------------------------------------------------------------------------------------------------------------------------------------------------------------------------------|
| 88    |    | flight,plane,aviation<br>flying,california,pilot<br>aircraft,pilot,fighter<br>airport,travel,architecture<br>plane,fly,pilot | bridge-tower:NN<br>floor-tower:PREP_OF<br>floor-glass:NN<br>view-tower:PREP_FROM<br>ferry-the:DET<br>port-the:DET<br>deck-observation:NN<br>train-sky:NN<br>view-building:PREP_FROM<br>reflection-window:PREP_IN<br>floor-12th:AMOD<br>bridge-harbour:NN<br>pass-to:AUX<br>plant-treatment:NN<br>root-station:ROOT |
| 89    |   | stream,trees,sky<br>trees,mountains,clouds<br>pond,trees,reflections<br>paradise,ocean,sea<br>green,sky,clouds               | garden-water:NN<br>bend-the:DET<br>green-so:ADVMOD<br>bridge-rock:NN<br>river-small:AMOD<br>garden-japanese:AMOD<br>road-house:PREP_TO<br>house-mountains:PREP_IN<br>river-mountains:PREP_IN<br>road-winding:AMOD<br>house-cool:AMOD<br>wall-retaining:AMOD<br>road-rural:AMOD<br>creek-the:DET<br>pond-the:DET    |
| 90    |  | shops,fun,florida<br>science,work,glass<br>store,people,street<br>university,girl,people<br>design,interior,furniture        | lab-computer:NN<br>kitchen-the:DET<br>store-apple:NN<br>shopping-window:NN<br>walk-when:ADVMOD<br>view-kitchen:PREP_OF<br>wall-back:AMOD<br>area-lounge:NN<br>window-shop:NN<br>kitchen-house:NN<br>kitchen-a:DET<br>kitchen-new:AMOD<br>lab-the:DET<br>root-desk:ROOT<br>window-display:NN                        |

Continued on next page

**Table1 – continued from previous page**

| Index | Image                                                                               | NUS-WIDE Concepts                                                                                                                             | SBU Concepts                                                                                                                                                                                                                                                                                                   |
|-------|-------------------------------------------------------------------------------------|-----------------------------------------------------------------------------------------------------------------------------------------------|----------------------------------------------------------------------------------------------------------------------------------------------------------------------------------------------------------------------------------------------------------------------------------------------------------------|
| 91    |    | architecture, windows, art<br>entrance, red, blue<br>floor, window, interior<br>design, interior, furniture<br>pool, apartments, architecture | standing-looking:DEP<br>kitchen-looking:VMOD<br>root-upstairs:ROOT<br>area-floor:NN<br>standing-kitchen:PREP_IN<br>suite-the:DET<br>room-dining:NN<br>room-great:AMOD<br>leads-door:NSUBJ<br>part-house:PREP_OF<br>had-house:NSUBJ<br>root-floor:ROOT<br>garage-car:NN<br>sliding-door:DOBJ<br>view-of:PREP    |
| 92    |   | auto, truck, canada<br>club, car, america<br>rally, car, racing<br>hangar, aviation, aircraft<br>airforce, museum, flag                       | car-a:DET<br>parked-street:PREP_IN<br>root-car:ROOT<br>truck-the:DET<br>car-street:PREP_IN<br>car-green:AMOD<br>car-little:AMOD<br>truck-pickup:NN<br>truck-a:DET<br>car-front:PREP_IN<br>spotted-car:NSUBJ<br>car-old:AMOD<br>parked-street:PREP_ON<br>car-new:AMOD<br>root-truck:ROOT                        |
| 93    |  | elephants, sunset, travel<br>sheep, landscape, sky<br>golf, spain, flag<br>cow, landscape, clouds<br>countryside, clouds, green               | cows-field:PREP_IN<br>sheep-field:PREP_IN<br>horses-field:PREP_IN<br>field-front:PREP_IN<br>root-sheep:ROOT<br>root-pasture:ROOT<br>root-horses:ROOT<br>grazing-field:PREP_IN<br>horse-field:PREP_IN<br>field-cow:NN<br>pasture-the:DET<br>pasture-a:DET<br>field-a:DET<br>middle-field:PREP_OF<br>cow-the:DET |

Continued on next page



**Table1 – continued from previous page**

| Index                  | Image                                                                               | NUS-WIDE Concepts                                                                                                                 | SBU Concepts                                                                                                                                                                                                                                                                                                              |
|------------------------|-------------------------------------------------------------------------------------|-----------------------------------------------------------------------------------------------------------------------------------|---------------------------------------------------------------------------------------------------------------------------------------------------------------------------------------------------------------------------------------------------------------------------------------------------------------------------|
| 94                     |    | transportation,blue,airplane<br>winter,canada,landscape<br>united,airplane,airport<br>shadow,street,people<br>best,aircraft,plane | channel-the:DET<br>airplane-a:DET<br>root-seagulls:ROOT<br>bridge-fog:PREP_IN<br>lake-frozen:AMOD<br>stuff-white:AMOD<br>line-red:AMOD<br>machine-flying:AMOD<br>bridge-big:AMOD<br>walking-beach:DOBJ<br>walking-beach:PREP_ON<br>flying-beach:PREP_OVER<br>flying-formation:PREP_IN<br>root-air:ROOT<br>root-flies:ROOT |
| 95                     |   | road,clouds,landscape<br>truck,sky,clouds<br>highway,landscape,sky<br>tollbooth,illinois,chicago<br>hotel,sunset,beach            | root-highway:ROOT<br>driving-home:DOBJ<br>highway-the:DET<br>root-road:ROOT<br>view-road:PREP_OF<br>driving-road:DOBJ<br>road-the:DET<br>road-beach:NN<br>on-road:POBJ<br>view-car:PREP_FROM<br>taken-car:PREP_FROM<br>line-white:AMOD<br>highway-a:DET<br>building-distance:PREP_IN<br>road-long:AMOD                    |
| 96                     |  | hotel,room,street<br>trip,summer,people<br>cafe,bar,street<br>asia,city,architecture<br>morning,people,coffee                     | tables-chairs:CONJ_AND<br>chairs-lounge:NN<br>tables-the:DET<br>house-glass:NN<br>root-bar:ROOT<br>house-yellow:AMOD<br>root-tables:ROOT<br>root-cafe:ROOT<br>chairs-the:DET<br>bar-the:DET<br>root-club:ROOT<br>view-table:PREP_FROM<br>area-bar:NN<br>house-tea:NN<br>root-place:ROOT                                   |
| Continued on next page |                                                                                     |                                                                                                                                   |                                                                                                                                                                                                                                                                                                                           |

**Table1 – continued from previous page**

| Index                  | Image                                                                               | NUS-WIDE Concepts                                                                                                                            | SBU Concepts                                                                                                                                                                                                                                                                                                                                                               |
|------------------------|-------------------------------------------------------------------------------------|----------------------------------------------------------------------------------------------------------------------------------------------|----------------------------------------------------------------------------------------------------------------------------------------------------------------------------------------------------------------------------------------------------------------------------------------------------------------------------------------------------------------------------|
| 97                     |    | <p> sunset,landscape,sea<br/> clouds,mountains,beach<br/> storms,nature,ocean<br/> tanker,clouds,sky<br/> cloud,storm,sun </p>               | <p> clouds-beach:PREP_OVER<br/> looked-clouds:NSUBJ<br/> cloud-black:AMOD<br/> floor-ocean:NN<br/> clouds-ocean:PREP_OVER<br/> clouds-water:PREP_OVER<br/> airplane-a:DET<br/> cloud-dark:AMOD<br/> ocean-the:DET<br/> root-ocean:ROOT<br/> formations-cloud:NN<br/> clouds-sky:PREP_AGAINST<br/> plane-flying:VMOD<br/> window-plane:PREP_OF<br/> root-airplane:ROOT </p> |
| 98                     |   | <p> tollbooth,illinois,chicago<br/> road,city,people<br/> truck,sky,clouds<br/> suburban,arizona,landscape<br/> roadblock,truck,belgium </p> | <p> trailer-a:DET<br/> lane-bike:NN<br/> root-cars:ROOT<br/> car-one:NUM<br/> cars-no:NEG<br/> view-street:NN<br/> truck-a:DET<br/> train-a:DET<br/> truck-white:AMOD<br/> trucks-the:DET<br/> goes-train:NSUBJ<br/> station-gas:NN<br/> train-road:NN<br/> airport-the:DET<br/> highway-a:DET </p>                                                                        |
| 99                     |  | <p> mountains,trees,water<br/> valleys,sky,clouds<br/> kauai,coast,green<br/> hiking,mountain,cliff<br/> forest,mountains,clouds </p>        | <p> root-gorge:ROOT<br/> mountains-blue:AMOD<br/> bridge-canyon:PREP_OVER<br/> road-winding:AMOD<br/> canyon-river:NN<br/> down-mountain:POBJ<br/> up-mountain:POBJ<br/> highlands-the:DET<br/> canyon-box:NN<br/> side-mountain:NN<br/> top-mountain:NN<br/> car-cable:NN<br/> trees-green:AMOD<br/> hike-the:DET<br/> mountain-green:AMOD </p>                           |
| Continued on next page |                                                                                     |                                                                                                                                              |                                                                                                                                                                                                                                                                                                                                                                            |

**Table1 – continued from previous page**

| Index | Image                                                                               | NUS-WIDE Concepts                                                                                                                     | SBU Concepts                                                                                                                                                                                                                                                                                                             |
|-------|-------------------------------------------------------------------------------------|---------------------------------------------------------------------------------------------------------------------------------------|--------------------------------------------------------------------------------------------------------------------------------------------------------------------------------------------------------------------------------------------------------------------------------------------------------------------------|
| 100   |    | decoration,home,room<br>design,interior,furniture<br>interior,furniture,house<br>carpet,room,chair<br>room,design,home                | room-family:NN<br>room-kitchen:CONJ_AND<br>root-room:ROOT<br>living-room:DOBJ<br>looking-room:PREP_INTO<br>kitchen-house:PREP_IN<br>root-kitchen:ROOT<br>room-new:AMOD<br>room-house:PREP_IN<br>tables-chairs:CONJ_AND<br>root-guest:ROOT<br>leads-door:NSUBJ<br>area-bar:NN<br>room-house:PREP_OF<br>shopping-window:NN |
| 101   |   | construction,boston,man<br>oilfield,art,museum<br>ruins,asia,decay<br>roadblock,water,tree<br>orange,light,colors                     | roots-tree:NN<br>nursery-tree:NN<br>tree-fell:RCMOD<br>truck-old:AMOD<br>trees-plant:NN<br>pump-the:DET<br>locals-the:DET<br>tree-palm:NN<br>stone-the:DET<br>tractor-a:DET<br>building-bridge:DOBJ<br>building-wall:DOBJ<br>boy-a:DET<br>wall-retaining:AMOD<br>tree-banana:NN                                          |
| 102   |  | houses,building,historic<br>house,architecture,historic<br>home,architecture,door<br>house>window,door<br>cottage,garden,architecture | had-house:NSUBJ<br>house-neighborhood:PREP_IN<br>root-front:ROOT<br>built-house:NSUBJ<br>house-beach:PREP_ON<br>house-typical:AMOD<br>house-cute:AMOD<br>root-cabin:ROOT<br>house-area:PREP_IN<br>part-house:PREP_OF<br>house-small:AMOD<br>door-window:CONJ_AND<br>house-tiny:AMOD<br>houses-two:NUM<br>port-car:NN     |

Continued on next page

**Table1 – continued from previous page**

| Index                  | Image                                                                               | NUS-WIDE Concepts                                                                                                                        | SBU Concepts                                                                                                                                                                                                                                                                                                             |
|------------------------|-------------------------------------------------------------------------------------|------------------------------------------------------------------------------------------------------------------------------------------|--------------------------------------------------------------------------------------------------------------------------------------------------------------------------------------------------------------------------------------------------------------------------------------------------------------------------|
| 103                    | 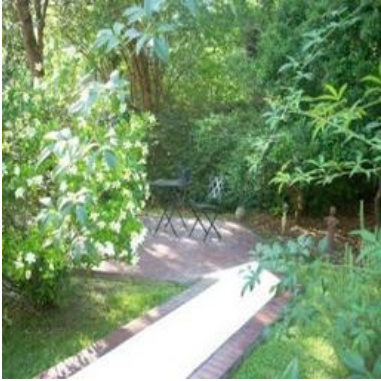   | green,forest,trees<br>creek,green,forest<br>paradise,ocean,sea<br>stream,waterfall,moss<br>scenic,river,beautiful                        | river-mountains:PREP_IN<br>creek-the:DET<br>tree-cedar:NN<br>yard-back:AMOD<br>bridge-little:AMOD<br>garden-water:NN<br>bridge-stream:PREP_OVER<br>river-bridge:PREP_UNDER<br>virginia-west:NN<br>tree-willow:NN<br>life-plant:NN<br>root-gorge:ROOT<br>river-small:AMOD<br>house-taken:VMOD<br>moss-green:AMOD          |
| 104                    |   | design,interior,furniture<br>office,apple,mac<br>kitchen,interior,design<br>chair,room,office<br>home,interior,design                    | kitchen-house:PREP_IN<br>desk-computer:NN<br>kitchen-new:AMOD<br>desk-a:DET<br>table-chairs:CONJ_AND<br>stove-kitchen:PREP_IN<br>kitchen-a:DET<br>desk-room:PREP_IN<br>desk-office:NN<br>sink-kitchen:PREP_IN<br>root-desk:ROOT<br>root-kitchen:ROOT<br>desk-office:PREP_IN<br>kitchen-house:PREP_OF<br>kitchen-old:AMOD |
| 105                    |  | waterfall,trees,moss<br>waterfalls,light,canada<br>waterfall,mountains,california<br>river,waterfall,landscape<br>waterfalls,forest,park | fall-water:NN<br>root-falls:ROOT<br>root-water:ROOT<br>color-blue:AMOD<br>lake-crater:NN<br>root-waterfall:ROOT<br>houses-real:AMOD<br>park-falls:NN<br>waterfall-the:DET<br>waterfall-a:DET<br>falls-the:DET<br>root-river:ROOT<br>houses-estate:NN<br>river-bridge:PREP_UNDER<br>lake-point:NN                         |
| Continued on next page |                                                                                     |                                                                                                                                          |                                                                                                                                                                                                                                                                                                                          |



**Table1 – continued from previous page**

| Index | Image                                                                               | NUS-WIDE Concepts                                                                                                             | SBU Concepts                                                                                                                                                                                                                                                                                                   |
|-------|-------------------------------------------------------------------------------------|-------------------------------------------------------------------------------------------------------------------------------|----------------------------------------------------------------------------------------------------------------------------------------------------------------------------------------------------------------------------------------------------------------------------------------------------------------|
| 106   |    | home,interior,design<br>decoration,home,room<br>interior,furniture,house<br>design,interior,furniture<br>singing,kids,man     | bedroom-house:PREP_IN<br>bed-size:NN<br>lounge-the:DET<br>fireplace-the:DET<br>room-house:PREP_OF<br>bed-bedroom:PREP_IN<br>bed-room:PREP_IN<br>root-lounge:ROOT<br>root-room:ROOT<br>bed-queen:NN<br>root-bedroom:ROOT<br>reading-book:DOBJ<br>room-house:PREP_IN<br>room-kitchen:CONJ_AND<br>room-family:NN  |
| 107   |   | airforce,vietnam,navy<br>war,world,army<br>trip,summer,people<br>vietnam,soldier,adults<br>shops,fun,florida                  | market-central:AMOD<br>market-a:DET<br>market-fruit:NN<br>market-food:NN<br>root-fresh:ROOT<br>shirt-blue:AMOD<br>market-air:NN<br>market-local:AMOD<br>house-tea:NN<br>market-open:AMOD<br>shirt-the:DET<br>root-bar:ROOT<br>bar-the:DET<br>market-fish:NN<br>market-largest:AMOD                             |
| 108   |  | railing,night,sunset<br>apartments,pool,swimming<br>sydney,coast,people<br>swimming,sky,trees<br>pool,apartments,architecture | plant-treatment:NN<br>window-master:NN<br>bridge-longest:AMOD<br>rail-the:DET<br>plant-water:NN<br>bridge-canal:PREP_OVER<br>bridge-water:DOBJ<br>field-ball:NN<br>building-office:NN<br>bridge-bike:NN<br>building-distance:PREP_IN<br>on-bridge:POBJ<br>cross-river:DOBJ<br>line-water:NN<br>houses-beach:NN |

Continued on next page

**Table1 – continued from previous page**

| Index | Image                                                                               | NUS-WIDE Concepts                                                                                                          | SBU Concepts                                                                                                                                                                                                                                                                                                    |
|-------|-------------------------------------------------------------------------------------|----------------------------------------------------------------------------------------------------------------------------|-----------------------------------------------------------------------------------------------------------------------------------------------------------------------------------------------------------------------------------------------------------------------------------------------------------------|
| 109   |    | castle,architecture,europe<br>ruins,sky,castle<br>ancient,pyramid,egypt<br>italy,water,italians<br>stone,architecture,old  | castle-the:DET<br>wall-castle:NN<br>castle-old:AMOD<br>wall-castle:PREP_OF<br>castle-a:DET<br>root-castle:ROOT<br>part-wall:PREP_OF<br>fortress-the:DET<br>wall-city:NN<br>castle-an:DET<br>walls-castle:PREP_OF<br>century-the:DET<br>tower-castle:NN<br>century-17th:AMOD<br>tower-castle:PREP_OF             |
| 110   |   | roadblock,truck,belgium<br>umbrella,street,people<br>roadblock,protest,london<br>roadblock,water,tree<br>june,world,france | cross-street:DOBJ<br>sign-middle:PREP_IN<br>middle-street:PREP_OF<br>street-house:PREP_IN_FRONT_OF<br>street-front:PREP_IN<br>road-busy:AMOD<br>cars-no:NEG<br>roads-the:DET<br>bus-city:NN<br>sign-stop:NN<br>down-hill:POBJ<br>trees-plant:NN<br>crossing-street:DOBJ<br>street-house:PREP_OF<br>lane-bike:NN |
| 111   |  | jeep,sky,blue<br>truck,tanker,massachusetts<br>construction,night,clouds<br>oil,field,kuwait<br>iceland,church,abandoned   | root-tractor:ROOT<br>truck-the:DET<br>chairs-beach:NN<br>tractor-a:DET<br>trucks-the:DET<br>truck-field:PREP_IN<br>scene-typical:AMOD<br>car-field:PREP_IN<br>root-truck:ROOT<br>parked-truck:NSUBJ<br>locals-the:DET<br>root-pump:ROOT<br>truck-a:DET<br>root-trucks:ROOT<br>root-train:ROOT                   |

Continued on next page

**Table1 – continued from previous page**

| Index                  | Image                                                                               | NUS-WIDE Concepts                                                                                                       | SBU Concepts                                                                                                                                                                                                                                                                                                       |
|------------------------|-------------------------------------------------------------------------------------|-------------------------------------------------------------------------------------------------------------------------|--------------------------------------------------------------------------------------------------------------------------------------------------------------------------------------------------------------------------------------------------------------------------------------------------------------------|
| 112                    |    | oilfield,kuwait,california<br>tanks,oil,sunset<br>rural,landscape,clouds<br>golf,spain,flag<br>soldier,mountains,marine | field-cow:NN<br>town-small:NN<br>field-front:PREP_IN<br>countryside-the:DET<br>pasture-a:DET<br>community-the:DET<br>pasture-horse:NN<br>root-pasture:ROOT<br>pasture-cow:NN<br>fields-green:AMOD<br>architecture-building:NN<br>pasture-the:DET<br>house-farm:NN<br>house-field:PREP_IN<br>house-distance:PREP_IN |
| 113                    |   | trees,leaves,autumn<br>winter,water,sky<br>mist,forest,light<br>fog,forest,trees<br>snow,tree,trees                     | trees-bare:AMOD<br>root-trees:ROOT<br>trees-white:AMOD<br>tree-winter:PREP_IN<br>trees-white:PREP_IN<br>storm-ice:NN<br>trees-the:DET<br>trees-black:AMOD<br>snow-a:DET<br>covered-trees:DOBJ<br>forest-a:DET<br>photo-black:AMOD<br>storm-winter:NN<br>root-snow:ROOT<br>covered-ice:PREP_IN                      |
| 114                    |  | war,world,army<br>outside,portrait,cat<br>graffiti,city,architecture<br>raft,pool,green<br>shade,leaves,trees           | friends-closest:AMOD<br>home-family:NN<br>house-tree:NN<br>shrine-a:DET<br>root-live:ROOT<br>house-cat:NN<br>food-the:DET<br>root-nap:ROOT<br>chairs-lounge:NN<br>chair-lounge:NN<br>root-breakfast:ROOT<br>boat-house:NN<br>book-a:DET<br>root-sit:ROOT<br>in-house:POBJ                                          |
| Continued on next page |                                                                                     |                                                                                                                         |                                                                                                                                                                                                                                                                                                                    |

**Table1 – continued from previous page**

| Index                  | Image                                                                               | NUS-WIDE Concepts                                                                                                                    | SBU Concepts                                                                                                                                                                                                                                                                                                  |
|------------------------|-------------------------------------------------------------------------------------|--------------------------------------------------------------------------------------------------------------------------------------|---------------------------------------------------------------------------------------------------------------------------------------------------------------------------------------------------------------------------------------------------------------------------------------------------------------|
| 115                    |    | beach,landscape,clouds<br>tropical,beach,island<br>coast,nature,rocks<br>sand,waves,blue<br>hawaii,surf,kauai                        | beach-sand:NN<br>beach-black:AMOD<br>sand-beach:DEP<br>root-beach:ROOT<br>beach-private:AMOD<br>view-beach:PREP_OF<br>beach-island:PREP_ON<br>root-sand:ROOT<br>black-beach:DEP<br>lagoon-blue:AMOD<br>sand-a:DET<br>beach-little:AMOD<br>beach-house:PREP_BY<br>sand-black:AMOD<br>beach-red:AMOD            |
| 116                    |   | police,car,cars<br>driver,cars,auto<br>auto,truck,canada<br>car,automobile,truck<br>roadblock,water,tree                             | cars-many:AMOD<br>car-rental:AMOD<br>car-little:AMOD<br>cars-trucks:CONJ_AND<br>parked-car:NSUBJ<br>car-blue:AMOD<br>root-stuck:ROOT<br>root-van:ROOT<br>car-old:AMOD<br>van-white:AMOD<br>car-white:AMOD<br>car-front:PREP_IN<br>van-the:DET<br>car-green:AMOD<br>has-car:NSUBJ                              |
| 117                    |  | shrine,gate,sunset<br>wisconsin,rural,snow<br>house,architecture,historic<br>houses,building,historic<br>cottage,garden,architecture | covered-bridge:DOBJ<br>bridge-covered:AMOD<br>root-house:ROOT<br>house-mountains:PREP_IN<br>house-little:AMOD<br>root-cabin:ROOT<br>house-mountain:PREP_IN<br>house-hill:PREP_IN<br>house-a:DET<br>roof-tin:NN<br>see-house:DOBJ<br>road-back:AMOD<br>house-lake:PREP_BY<br>houses-the:DET<br>cute-house:DOBJ |
| Continued on next page |                                                                                     |                                                                                                                                      |                                                                                                                                                                                                                                                                                                               |



**Table1 – continued from previous page**

| Index | Image                                                                               | NUS-WIDE Concepts                                                                                                                       | SBU Concepts                                                                                                                                                                                                                                                                                                                                     |
|-------|-------------------------------------------------------------------------------------|-----------------------------------------------------------------------------------------------------------------------------------------|--------------------------------------------------------------------------------------------------------------------------------------------------------------------------------------------------------------------------------------------------------------------------------------------------------------------------------------------------|
| 118   |    | landscape,field,green<br>clouds,green,trees<br>landscapes,scenery,countryside<br>cloud,green,tree<br>texas,clouds,explore               | tree-field:PREP_IN<br>landscape-a:DET<br>tree-single:AMOD<br>clouds-storm:NN<br>field-golden:AMOD<br>field-an:DET<br>trees-olive:AMOD<br>sky-field:PREP_OVER<br>tree-lone:AMOD<br>window-bus:NN<br>hill-green:AMOD<br>field-corn:NN<br>pasture-horse:NN<br>middle-field:PREP_OF<br>tree-hill:PREP_ON                                             |
| 119   |   | stone,architecture,old<br>plaza,europa,church<br>palace,madrid,night<br>maryland,architecture,buildings<br>architecture,buildings,night | house-building:DEP<br>building-historic:AMOD<br>buildings-many:AMOD<br>root-theater:ROOT<br>building-large:AMOD<br>root-palace:ROOT<br>house-building:NSUBJ<br>houses-building:NSUBJ<br>building-town:PREP_IN<br>root-houses:ROOT<br>house-beautiful:AMOD<br>building-yellow:AMOD<br>building-style:NN<br>fortress-the:DET<br>row-houses:PREP_OF |
| 120   |  | chairs,interior,office<br>interior,furniture,house<br>work,office,apple<br>office,apple,mac<br>furniture,architecture,interior          | area-bar:NN<br>table-window:PREP_BY<br>room-family:NN<br>tv-screen:NN<br>root-lounge:ROOT<br>tables-the:DET<br>root-room:ROOT<br>table-chairs:CONJ_AND<br>tables-chairs:CONJ_AND<br>area-lounge:NN<br>area-floor:NN<br>room-dining:NN<br>chairs-the:DET<br>living-room:DOBJ<br>bedroom-house:PREP_OF                                             |

Continued on next page

**Table1 – continued from previous page**

| Index                  | Image                                                                               | NUS-WIDE Concepts                                                                                                        | SBU Concepts                                                                                                                                                                                                                                                                                                 |
|------------------------|-------------------------------------------------------------------------------------|--------------------------------------------------------------------------------------------------------------------------|--------------------------------------------------------------------------------------------------------------------------------------------------------------------------------------------------------------------------------------------------------------------------------------------------------------|
| 121                    |    | winter,canada,landscape<br>quebec,sky,sunset<br>iraq,army,military<br>cabin,winter,sky<br>war,ship,history               | snow-the:DET<br>snow-fresh:AMOD<br>covered-snow:PREP_IN<br>covered-bridge:DOBJ<br>storm-snow:NN<br>house-winter:PREP_IN<br>house-snow:PREP_IN<br>root-snow:ROOT<br>root-japan:ROOT<br>roof-tin:NN<br>snow-white:AMOD<br>house-neighbor:POSS<br>mirror-lake:DOBJ<br>winter-the:DET<br>down-hill:POBJ          |
| 122                    |   | pacific,waves,nature<br>cruise,paradise,island<br>natural,sea,ocean<br>island,landscape,sky<br>maldives,holiday,vacation | boat-bay:PREP_IN<br>bay-the:DET<br>coast-the:DET<br>beach-private:AMOD<br>rock-ocean:PREP_IN<br>view-boat:PREP_FROM<br>middle-water:PREP_OF<br>view-beach:PREP_FROM<br>middle-ocean:PREP_OF<br>middle-lake:PREP_OF<br>superior-lake:NN<br>sailboat-a:DET<br>gulf-the:DET<br>trip-boat:NN<br>house-light:AMOD |
| 123                    |  | islands,fish,underwater<br>maldives,coral,ocean<br>fish,diving,scuba<br>marine,underwater,diving<br>trip,fish,ocean      | fish-blue:AMOD<br>swimming-turtle:NN<br>fish-water:PREP_IN<br>school-fish:PREP_OF<br>turtle-water:PREP_IN<br>fish-tank:PREP_IN<br>clear-water:NSUBJ<br>reef-barrier:NN<br>reef-the:DET<br>tank-the:DET<br>water-green:AMOD<br>fish-lake:PREP_IN<br>floor-ocean:NN<br>water-crystal:NN<br>water-deep:AMOD     |
| Continued on next page |                                                                                     |                                                                                                                          |                                                                                                                                                                                                                                                                                                              |

**Table1 – continued from previous page**

| Index                  | Image                                                                               | NUS-WIDE Concepts                                                                                                                  | SBU Concepts                                                                                                                                                                                                                                                                                                                       |
|------------------------|-------------------------------------------------------------------------------------|------------------------------------------------------------------------------------------------------------------------------------|------------------------------------------------------------------------------------------------------------------------------------------------------------------------------------------------------------------------------------------------------------------------------------------------------------------------------------|
| 124                    |    | stream,trees,sky<br>plants,trees,tree<br>needles,sky,water<br>roadblock,water,tree<br>steps,green,red                              | root-garden:ROOT<br>beds-flower:NN<br>wall-retaining:AMOD<br>bridge-stream:PREP_OVER<br>root-beds:ROOT<br>fell-tree:NSUBJ<br>bridge-forest:PREP_IN<br>root-path:ROOT<br>bridge-wooden:AMOD<br>trees-orange:AMOD<br>bridge-road:PREP_ON<br>river-small:AMOD<br>bridge-little:AMOD<br>view-tree:PREP_OF<br>bridge-water:DOBJ         |
| 125                    |   | home,architecture,door<br>house,architecture,historic<br>county,architecture,georgia<br>houses,building,historic<br>rural,barn,old | root-home:ROOT<br>house-neighborhood:PREP_IN<br>house-traditional:AMOD<br>house-big:AMOD<br>root-cabin:ROOT<br>house-boat:NN<br>house-mountains:PREP_IN<br>house-school:NN<br>built-house:NSUBJPASS<br>house-area:PREP_IN<br>house-forest:PREP_IN<br>cute-house:DOBJ<br>house-trees:PREP_IN<br>house-green:AMOD<br>root-house:ROOT |
| 126                    |  | house,architecture,historic<br>houses,building,historic<br>historic,house,texas<br>old,sky,clouds<br>cottage,garden,architecture   | neighborhood-old:NN<br>house-wooden:AMOD<br>built-house:NSUBJ<br>roof-tin:NN<br>vintage-building:NN<br>cute-house:DOBJ<br>vintage-signs:NN<br>looks-house:NSUBJ<br>walking-vintage:PREP_DOWN<br>house-pink:AMOD<br>house-black:AMOD<br>house-beach:PREP_NEAR<br>root-houses:ROOT<br>houses-the:DET<br>roof-house:PREP_OF           |
| Continued on next page |                                                                                     |                                                                                                                                    |                                                                                                                                                                                                                                                                                                                                    |

**Table1 – continued from previous page**

| Index                  | Image                                                                               | NUS-WIDE Concepts                                                                                                            | SBU Concepts                                                                                                                                                                                                                                                                                                                       |
|------------------------|-------------------------------------------------------------------------------------|------------------------------------------------------------------------------------------------------------------------------|------------------------------------------------------------------------------------------------------------------------------------------------------------------------------------------------------------------------------------------------------------------------------------------------------------------------------------|
| 127                    |    | basketball,sunset,court<br>athlete,water,surf<br>track,sports,boston<br>waiting,bench,chair<br>club,party,black              | shirt-blue:AMOD<br>reflected-wall:PREP_IN<br>team-the:DET<br>glass-building:PREP_OF<br>reflected-building:PREP_IN<br>bridge-glass:NN<br>root-workers:ROOT<br>playing-ball:DOBJ<br>reflection-building:PREP_IN<br>dress-blue:AMOD<br>classroom-a:DET<br>root-student:ROOT<br>set-movie:NSUBJ<br>space-office:NN<br>pants-black:AMOD |
| 128                    |   | vacation,europe,blue<br>maryland,architecture,buildings<br>texas,high,metro<br>heritage,trip,church<br>finland,summer,clouds | taken-view:NSUBJ<br>root-temple:ROOT<br>roof-house:NN<br>root-passes:ROOT<br>casino-the:DET<br>root-travel:ROOT<br>taken-balcony:PREP_FROM<br>ship-the:DET<br>number-the:DET<br>building-in:PREP<br>ship-an:DET<br>view-tower:PREP_FROM<br>building-roof:PREP_WITH<br>view-of:PREP<br>house-sky:PREP_IN                            |
| 129                    |  | glacier,alaska,iceland<br>waves,rocks,coast<br>motion,water,nature<br>surf,coast,nature<br>waterfalls,light,canada           | lake-mountain:NN<br>lagoon-blue:AMOD<br>wave-a:DET<br>blue-water:NSUBJ<br>root-falls:ROOT<br>color-blue:AMOD<br>root-japan:ROOT<br>alps-the:DET<br>background-a:DET<br>wall-water:PREP_OF<br>root-ice:ROOT<br>reflected-water:PREP_IN<br>water-blue:AMOD<br>color-water:NN<br>speed-shutter:NN                                     |
| Continued on next page |                                                                                     |                                                                                                                              |                                                                                                                                                                                                                                                                                                                                    |



**Table1 – continued from previous page**

| Index                  | Image                                                                               | NUS-WIDE Concepts                                                                                                               | SBU Concepts                                                                                                                                                                                                                                                                                                               |
|------------------------|-------------------------------------------------------------------------------------|---------------------------------------------------------------------------------------------------------------------------------|----------------------------------------------------------------------------------------------------------------------------------------------------------------------------------------------------------------------------------------------------------------------------------------------------------------------------|
| 130                    |    | interior,furniture,house<br>decoration,home,room<br>hotel,room,street<br>design,interior,furniture<br>modern,interior,furniture | house-bedroom:AMOD<br>area-bar:NN<br>room-family:NN<br>standing-room:PREP_IN<br>fireplace-the:DET<br>standing-door:PREP_IN<br>living-room:DOBJ<br>standing-looking:CONJ_AND<br>lounge-the:DET<br>root-guest:ROOT<br>room-dining:NN<br>area-lounge:NN<br>dining-room:DOBJ<br>standing-doorway:PREP_IN<br>room-house:PREP_OF |
| 131                    |   | washington,seattle,art<br>riot,protesters,photojournalism<br>sand,nature,desert<br>love,couple,bride<br>square,portrait,china   | boy-little:AMOD<br>sand-shoes:PREP_IN<br>feet-bare:AMOD<br>girl-dog:CONJ_AND<br>water-house:PREP_IN<br>shoe-a:DET<br>girl-walking:DEP<br>girl-cute:AMOD<br>boy-young:AMOD<br>father-son:CONJ_AND<br>bench-the:DET<br>sidewalk-a:DET<br>guitar-a:DET<br>buried-sand:PREP_IN<br>dog-black:AMOD                               |
| 132                    |  | building,church,europe<br>church,sky,building<br>heritage,trip,church<br>tower,europe,france<br>buildings,building,travel       | clock-tower:DEP<br>courthouse-county:NN<br>tower-bell:NN<br>stone-white:AMOD<br>tower-church:NN<br>church-catholic:AMOD<br>tower-town:PREP_IN<br>square-main:AMOD<br>church-small:AMOD<br>root-church:ROOT<br>tower-church:PREP_OF<br>tower-main:AMOD<br>church-built:VMOD<br>architecture-the:DET<br>one-towers:PREP_OF   |
| Continued on next page |                                                                                     |                                                                                                                                 |                                                                                                                                                                                                                                                                                                                            |

**Table1 – continued from previous page**

| Index | Image                                                                               | NUS-WIDE Concepts                                                                                                    | SBU Concepts                                                                                                                                                                                                                                                                                       |
|-------|-------------------------------------------------------------------------------------|----------------------------------------------------------------------------------------------------------------------|----------------------------------------------------------------------------------------------------------------------------------------------------------------------------------------------------------------------------------------------------------------------------------------------------|
| 133   |    | mosque,pakistan,spain<br>tourism,europe,trip<br>floor>window,interior<br>mosques,asia,islam<br>lamp,night,building   | root-corridor:ROOT<br>corridor-the:DET<br>corridor-a:DET<br>standing-am:AUX<br>case-the:DET<br>standing-way:PREP_IN<br>house-main:AMOD<br>standing-looking:VMOD<br>doors-windows:CONJ_AND<br>doors-the:DET<br>floors-the:DET<br>door-main:AMOD<br>hallway-the:DET<br>room-new:AMOD<br>hotel-a:DET  |
| 134   |   | restaurant,street,people<br>cafe,bar,street<br>design,interior,furniture<br>store,people,street<br>shops,fun,florida | office-box:NN<br>area-bar:NN<br>root-bar:ROOT<br>area-lounge:NN<br>style-the:DET<br>kitchen-house:PREP_IN<br>bar-little:AMOD<br>created-style:PREP_WITH<br>standing-in:PRT<br>shopping-window:NN<br>area-office:NN<br>style-door:NN<br>house-open:AMOD<br>area-floor:NN<br>created-cherry:PREP_IN  |
| 135   |  | skiing,ice,blue<br>winter,canada,landscape<br>snow,canada,skiing<br>skiing,explore,colorado<br>mountain,snow,winter  | snow-the:DET<br>ice-the:DET<br>snow-fresh:AMOD<br>root-snow:ROOT<br>walking-snow:PREP_IN<br>root-footprints:ROOT<br>mountain-the:DET<br>root-pigeons:ROOT<br>covered-snow:PREP_IN<br>park-car:DOBJ<br>birds-black:AMOD<br>birds-flying:DEP<br>white-the:DET<br>storm-snow:NN<br>covered-snow:NSUBJ |

Continued on next page

**Table1 – continued from previous page**

| Index | Image                                                                               | NUS-WIDE Concepts                                                                                                                  | SBU Concepts                                                                                                                                                                                                                                                                                                            |
|-------|-------------------------------------------------------------------------------------|------------------------------------------------------------------------------------------------------------------------------------|-------------------------------------------------------------------------------------------------------------------------------------------------------------------------------------------------------------------------------------------------------------------------------------------------------------------------|
| 136   |    | interior,furniture,house<br>decoration,home,room<br>kitchen,interior,design<br>home,interior,design<br>design,interior,furniture   | root-room:ROOT<br>house-bedroom:AMOD<br>living-room:DOBJ<br>room-family:NN<br>room-living:AMOD<br>room-kitchen:CONJ_AND<br>tables-chairs:CONJ_AND<br>room-great:AMOD<br>root-guest:ROOT<br>master-the:DET<br>root-bedroom:ROOT<br>rooms-the:DET<br>leads-door:NSUBJ<br>root-lounge:ROOT<br>root-downstairs:ROOT         |
| 137   |   | studio,microphones,office<br>telephones,office,room<br>decoration,home,room<br>oil,demonstration,bush<br>design,interior,furniture | standing-door:PREP_IN<br>space-the:DET<br>building-house:DOBJ<br>root-upstairs:ROOT<br>standing-room:PREP_IN<br>door-looking:VMOD<br>sliding-doors:DOBJ<br>root-guest:ROOT<br>room-new:AMOD<br>wall-kitchen:NN<br>window-new:AMOD<br>room-kitchen:CONJ_AND<br>see-door:DOBJ<br>shelves-the:DET<br>floor-third:AMOD      |
| 138   |  | design,interior,furniture<br>interior,furniture,house<br>office,apple,mac<br>modern,interior,furniture<br>greece,boats,boat        | tables-chairs:CONJ_AND<br>sliding-doors:DOBJ<br>house-house:DEP<br>house-bedroom:AMOD<br>root-chairs:ROOT<br>root-deck:ROOT<br>view-kitchen:PREP_OF<br>table-chairs:CONJ_AND<br>root-balcony:ROOT<br>window-bay:NN<br>tables-the:DET<br>floor-house:PREP_OF<br>window-big:AMOD<br>chairs-the:DET<br>building-science:NN |

Continued on next page

Table1 – continued from previous page

| Index                  | Image                                                                               | NUS-WIDE Concepts                                                                                                        | SBU Concepts                                                                                                                                                                                                                                                                                                              |
|------------------------|-------------------------------------------------------------------------------------|--------------------------------------------------------------------------------------------------------------------------|---------------------------------------------------------------------------------------------------------------------------------------------------------------------------------------------------------------------------------------------------------------------------------------------------------------------------|
| 139                    |    | waterfall,creek,moss<br>creek,waterfall,moss<br>stream,waterfall,moss<br>moss,waterfall,stream<br>waterfalls,forest,park | root-waterfall:ROOT<br>root-falls:ROOT<br>waterfall-a:DET<br>fall-water:NN<br>water-running:VMOD<br>root-stream:ROOT<br>root-water:ROOT<br>falls-water:NSUBJ<br>river-bridge:PREP_UNDER<br>root-river:ROOT<br>river-small:AMOD<br>river-a:DET<br>water-white:AMOD<br>river-mountain:NN<br>river-mountains:PREP_IN         |
| 140                    |   | valley,snow,blue<br>mountains,trees,water<br>switzerland,snow,mountains<br>hiking,mountain,cliff<br>snow,mountain,clouds | root-valley:ROOT<br>floor-valley:NN<br>road-winding:AMOD<br>canyon-river:NN<br>road-old:AMOD<br>pass-mountain:NN<br>valley-a:DET<br>mountains-white:AMOD<br>lake-mountains:PREP_IN<br>canyon-box:NN<br>summit-the:DET<br>mountains-rocky:NN<br>root-canyon:ROOT<br>mountain-highest:AMOD<br>valley-the:DET                |
| 141                    |  | swim,underwater,sport<br>houseboat,summer>window<br>aquarium,canada,sun<br>tennis,green,lines<br>power,blue,red          | dog-car:PREP_IN<br>waiting-car:PREP_IN<br>home-coming:AMOD<br>swimming-ocean:PREP_IN<br>decided-take:XCOMP<br>ball-white:AMOD<br>doggy-window:PREP_IN<br>girl-the:DET<br>umbrella-a:DET<br>pool-swimming:NN<br>swimming-pool:PREP_IN<br>root-mother:ROOT<br>dog-truck:PREP_IN<br>riding-car:PREP_IN<br>pool-swimming:AMOD |
| Continued on next page |                                                                                     |                                                                                                                          |                                                                                                                                                                                                                                                                                                                           |



Table1 – continued from previous page

| Index | Image                                                                               | NUS-WIDE Concepts                                                                                                     | SBU Concepts                                                                                                                                                                                                                                                                                                             |
|-------|-------------------------------------------------------------------------------------|-----------------------------------------------------------------------------------------------------------------------|--------------------------------------------------------------------------------------------------------------------------------------------------------------------------------------------------------------------------------------------------------------------------------------------------------------------------|
| 142   |    | signs,asia,japan<br>morning,people,coffee<br>news,police,protest<br>democrat,beach,election<br>subway,people,graffiti | waiting-line:PREP_IN<br>root-team:ROOT<br>train-sky:NN<br>dude-the:DET<br>root-crowd:ROOT<br>root-people:ROOT<br>shirt-blue:AMOD<br>station-central:AMOD<br>ride-train:NN<br>boys-blue:PREP_IN<br>shirt-pink:AMOD<br>band-the:DET<br>best-seats:DEP<br>women-the:DET<br>guy-the:DET                                      |
| 143   |   | palm,sand,island<br>paradise,ocean,sea<br>tree,clouds,sunset<br>island,landscape,sky<br>natural,sea,ocean             | root-palm:ROOT<br>tree-palm:NN<br>trees-palm:NN<br>palm-trees:DEP<br>beach-sand:NN<br>palm-tree:DEP<br>palm-trees:DOBJ<br>tree-single:AMOD<br>beach-white:AMOD<br>lone-tree:DEP<br>forest-tree:NN<br>tree-one:NUM<br>trees-coconut:AMOD<br>root-lone:ROOT<br>white-beach:DEP                                             |
| 144   |  | radar,sky,night<br>pole,power,sunset<br>britain,old,city<br>antenna,silhouette,tower<br>poland,ship,sky               | building-highest:AMOD<br>county-marin:NN<br>shot-from:PREP<br>sky-rare:AMOD<br>tower-bridge:NN<br>taken-bridge:NSUBJ<br>crane-the:DET<br>span-the:DET<br>spans-bridge:NSUBJ<br>gate-golden:AMOD<br>tower-television:NN<br>view-tower:PREP_OF<br>bridge-<br>construction:PREP_UNDER<br>bridge-gate:NN<br>site-building:NN |

Continued on next page

**Table1 – continued from previous page**

| Index | Image                                                                               | NUS-WIDE Concepts                                                                                                                  | SBU Concepts                                                                                                                                                                                                                                                                                                            |
|-------|-------------------------------------------------------------------------------------|------------------------------------------------------------------------------------------------------------------------------------|-------------------------------------------------------------------------------------------------------------------------------------------------------------------------------------------------------------------------------------------------------------------------------------------------------------------------|
| 145   |    | interior,light,museum<br>school,architecture,building<br>seattle,library,architecture<br>museum,light,blue<br>cabin,airplane,plane | root-chairs:ROOT<br>plan-the:DET<br>root-staircase:ROOT<br>room-bed:NN<br>root-train:ROOT<br>car-yellow:AMOD<br>ship-the:DET<br>shape-good:AMOD<br>classroom-a:DET<br>glass-water:PREP_OF<br>plate-a:DET<br>room-a:DET<br>root-flash:ROOT<br>floor-third:AMOD<br>floor-fourth:AMOD                                      |
| 146   |   | design,interior,furniture<br>home,interior,design<br>decoration,home,room<br>chair,room,office<br>floor>window,interior            | color-wall:NN<br>kitchen-new:AMOD<br>cabinet-kitchen:PREP_IN<br>view-kitchen:PREP_OF<br>books-the:DET<br>sign-book:PREP_IN<br>root-cabinet:ROOT<br>bedroom-spare:AMOD<br>kitchen-the:DET<br>root-downstairs:ROOT<br>kitchen-a:DET<br>root-boxes:ROOT<br>space-the:DET<br>board-the:DET<br>shelves-the:DET               |
| 147   |  | chairs,interior,office<br>interior,furniture,house<br>chair,room,office<br>furniture,chairs,retro<br>modern,interior,furniture     | table-chairs:CONJ_AND<br>chairs-the:DET<br>tables-chairs:CONJ_AND<br>tables-the:DET<br>table-window:PREP_BY<br>table-kitchen:PREP_IN<br>root-tables:ROOT<br>table-house:PREP_IN<br>area-bar:NN<br>root-chairs:ROOT<br>root-lounge:ROOT<br>room-house:PREP_IN<br>table-breakfast:NN<br>chair-black:AMOD<br>room-new:AMOD |

Continued on next page

Table1 – continued from previous page

| Index                  | Image                                                                               | NUS-WIDE Concepts                                                                                                                                    | SBU Concepts                                                                                                                                                                                                                                                                                                                                   |
|------------------------|-------------------------------------------------------------------------------------|------------------------------------------------------------------------------------------------------------------------------------------------------|------------------------------------------------------------------------------------------------------------------------------------------------------------------------------------------------------------------------------------------------------------------------------------------------------------------------------------------------|
| 148                    |    | skyscraper,blue,windows<br>manhattan,skyscraper,architecture<br>building,glass,skyscraper<br>architecture,glass,abstract<br>steel,glass,architecture | building-office:NN<br>building-cool:AMOD<br>tower-office:NN<br>blue-dark:AMOD<br>root-building:ROOT<br>building-blue:AMOD<br>building-shiny:AMOD<br>building-london:PREP_IN<br>root-office:ROOT<br>buildings-office:NN<br>one-buildings:PREP_OF<br>building-modern:AMOD<br>office-building:VMOD<br>building-sky:PREP_IN<br>building-black:AMOD |
| 149                    |   | camera,lens,city<br>display,apple,mac<br>design,interior,furniture<br>airforce,museum,flag<br>office,people,men                                      | stove-house:PREP_IN<br>table-side:NN<br>laptop-the:DET<br>stove-kitchen:PREP_IN<br>microwave-the:DET<br>reflected-mirror:PREP_IN<br>desk-office:PREP_IN<br>tv-screen:NN<br>kitchen-a:DET<br>oven-microwave:NN<br>desk-office:NN<br>cup-coffee:PREP_OF<br>monitor-the:DET<br>office-home:NN<br>desk-the:DET                                     |
| 150                    |  | cottage,garden,architecture<br>public,interesting,architecture<br>houses,windows,old<br>flags,america,architecture<br>balcony,spain,flowers          | root-row:ROOT<br>fence-picket:NN<br>boxes-window:NN<br>house-beautiful:AMOD<br>house-neighborhood:PREP_IN<br>windows-doors:CONJ_AND<br>root-houses:ROOT<br>bed-front:PREP_IN<br>beds-flower:NN<br>across-street:POBJ<br>building-apartment:NN<br>town-beach:NN<br>fence-white:AMOD<br>porch-the:DET<br>house-pink:AMOD                         |
| Continued on next page |                                                                                     |                                                                                                                                                      |                                                                                                                                                                                                                                                                                                                                                |

**Table1 – continued from previous page**

| Index | Image                                                                               | NUS-WIDE Concepts                                                                                                        | SBU Concepts                                                                                                                                                                                                                                                                                                    |
|-------|-------------------------------------------------------------------------------------|--------------------------------------------------------------------------------------------------------------------------|-----------------------------------------------------------------------------------------------------------------------------------------------------------------------------------------------------------------------------------------------------------------------------------------------------------------|
| 151   |    | barge,england,canal<br>ancient,tree,city<br>roadblock,water,tree<br>shade,leaves,trees<br>airforce,museum,flag           | root-home:ROOT<br>area-mountain:NN<br>house-forest:PREP_IN<br>mountains-white:AMOD<br>bridge-small:AMOD<br>walk-can:AUX<br>covered-bridge:DOBJ<br>lodge-the:DET<br>under-tree:POBJ<br>tree-big:AMOD<br>surrounded-trees:AGENT<br>locals-the:DET<br>house-stayed:RCMOD<br>bridge-park:PREP_IN<br>root-truck:ROOT |
| 152   |   | cliff,trees,hiking<br>hiking,mountain,cliff<br>mist,mountains,clouds<br>mountains,trees,water<br>forest,mountains,clouds | mountain-rock:NN<br>rocks-red:AMOD<br>view-rock:PREP_OF<br>mountains-blue:AMOD<br>view-hill:PREP_FROM<br>side-mountain:NN<br>formations-rock:NN<br>root-castle:ROOT<br>top-mountain:PREP_OF<br>point-the:DET<br>hill-castle:NN<br>root-peak:ROOT<br>view-clear:AMOD<br>mountain-a:DET<br>dot-white:AMOD         |
| 153   |  | store,people,street<br>market,street,man<br>morning,people,coffee<br>book,library,color<br>roof>window,red               | root-market:ROOT<br>market-the:DET<br>market-small:AMOD<br>pavilion-the:DET<br>tables-the:DET<br>market-bird:NN<br>market-a:DET<br>market-local:AMOD<br>vendor-a:DET<br>market-fish:NN<br>site-construction:NN<br>window-street:PREP_IN<br>market-air:NN<br>market-wholesale:AMOD<br>wall-a:DET                 |

Continued on next page



**Table1 – continued from previous page**

| Index                  | Image                                                                               | NUS-WIDE Concepts                                                                                                                   | SBU Concepts                                                                                                                                                                                                                                                                                                                                     |
|------------------------|-------------------------------------------------------------------------------------|-------------------------------------------------------------------------------------------------------------------------------------|--------------------------------------------------------------------------------------------------------------------------------------------------------------------------------------------------------------------------------------------------------------------------------------------------------------------------------------------------|
| 154                    |    | iceland,ice,water<br>mountains,winter,mountain<br>mountain,snow,winter<br>ice,blue,glacier<br>landscapes,mountain,mountains         | pass-mountain:NN<br>falls-water:NSUBJ<br>root-snow:ROOT<br>rocks-white:AMOD<br>snow-ground:PREP_ON<br>river-mountain:NN<br>river-running:VMOD<br>crater-the:DET<br>rocks-black:AMOD<br>formation-rock:NN<br>lake-mountains:PREP_IN<br>rocks-the:DET<br>root-cave:ROOT<br>snow-a:DET<br>snow-white:AMOD                                           |
| 155                    |   | bathroom,abandoned,interior<br>bathroom,portrait,self<br>decoration,home,room<br>cottage,vintage,pink<br>antique,telephones,vintage | sink-bathroom:PREP_IN<br>root-bathtub:ROOT<br>root-bathroom:ROOT<br>root-tub:ROOT<br>bathroom-the:DET<br>tub-the:DET<br>bathroom-house:PREP_IN<br>bathroom-a:DET<br>bathroom-floor:NN<br>root-bath:ROOT<br>bath-the:DET<br>root-toilet:ROOT<br>root-hole:ROOT<br>toilet-a:DET<br>tub-bath:NN                                                     |
| 156                    |  | view,night,city<br>aerial,city,germany<br>old,sky,clouds<br>needles,sky,water<br>helicopter,aerial,hawaii                           | view-hill:PREP_FROM<br>view-roof:PREP_FROM<br>view-balcony:PREP_FROM<br>view-castle:PREP_FROM<br>view-tower:PREP_FROM<br>hill-the:DET<br>view-distance:PREP_IN<br>balcony-floor:NN<br>root-view:ROOT<br>view-window:PREP_FROM<br>one-house:NSUBJ<br>building-distance:PREP_IN<br>hill-background:PREP_IN<br>building-white:AMOD<br>mill-paper:NN |
| Continued on next page |                                                                                     |                                                                                                                                     |                                                                                                                                                                                                                                                                                                                                                  |

**Table1 – continued from previous page**

| Index                  | Image                                                                               | NUS-WIDE Concepts                                                                                                | SBU Concepts                                                                                                                                                                                                                                                                                                                             |
|------------------------|-------------------------------------------------------------------------------------|------------------------------------------------------------------------------------------------------------------|------------------------------------------------------------------------------------------------------------------------------------------------------------------------------------------------------------------------------------------------------------------------------------------------------------------------------------------|
| 157                    |    | prison,orange,woman<br>war,world,army<br>oilfield,art,museum<br>lines,urban,color<br>weapons,art,sign            | orange-an:DET<br>orange-black:CONJ_AND<br>orange-the:DET<br>root-orange:ROOT<br>tables-chairs:CONJ_AND<br>orange-a:DET<br>stand-the:DET<br>department-the:DET<br>light-orange:AMOD<br>center-shopping:NN<br>shops-the:DET<br>seats-the:DET<br>band-the:DET<br>guitar-the:DET<br>casino-the:DET                                           |
| 158                    |   | tulip,color,orange<br>sweet,green,flowers<br>fantasy,red,sunset<br>display,art,store<br>chair,white,color        | flowers-pot:PREP_IN<br>pretty-flowers:DEP<br>root-roses:ROOT<br>arrangements-flower:NN<br>bloom-full:AMOD<br>roses-the:DET<br>tree-house:PREP_AT<br>root-display:ROOT<br>root-arrangement:ROOT<br>flowers-red:AMOD<br>covered-flowers:PREP_IN<br>shop-flower:NN<br>flowers-window:PREP_IN<br>flowers-pretty:AMOD<br>flowers-plastic:AMOD |
| 159                    |  | mall,shop,ontario<br>shops,urban,japan<br>restaurant,street,people<br>shopping,bazaar,japan<br>ontario,mall,city | root-bar:ROOT<br>station-bus:NN<br>store-the:DET<br>stand-fruit:NSUBJ<br>bar-little:AMOD<br>shelves-the:DET<br>root-store:ROOT<br>train-sky:NN<br>store-grocery:NN<br>market-fruit:NN<br>office-box:NN<br>store-book:NN<br>root-books:ROOT<br>street-market:NN<br>window-store:NN                                                        |
| Continued on next page |                                                                                     |                                                                                                                  |                                                                                                                                                                                                                                                                                                                                          |

**Table1 – continued from previous page**

| Index | Image                                                                               | NUS-WIDE Concepts                                                                                                               | SBU Concepts                                                                                                                                                                                                                                                                                        |
|-------|-------------------------------------------------------------------------------------|---------------------------------------------------------------------------------------------------------------------------------|-----------------------------------------------------------------------------------------------------------------------------------------------------------------------------------------------------------------------------------------------------------------------------------------------------|
| 160   |    | vietnam,soldier,adults<br>vegetables,color,people<br>shop,market,food<br>parade,school,old<br>shops,fun,florida                 | market-street:NN<br>market-the:DET<br>root-market:ROOT<br>market-fruit:NN<br>root-vendor:ROOT<br>root-women:ROOT<br>market-food:NN<br>at-market:POBJ<br>market-local:AMOD<br>market-a:DET<br>market-town:PREP_IN<br>market-central:AMOD<br>fish-market:DEP<br>market-open:AMOD<br>market-small:AMOD |
| 161   |   | desert,portrait,california<br>cave,county,fox<br>shadow,street,people<br>colorado,vacation,aircraft<br>army,mountains,abandoned | stone-the:DET<br>root-lizard:ROOT<br>caves-the:DET<br>crack-wall:PREP_IN<br>bridge-rock:NN<br>monument-national:AMOD<br>root-face:ROOT<br>flow-water:NN<br>cave-the:DET<br>century-17th:AMOD<br>wall-rock:NN<br>wall-canyon:NN<br>lion-a:DET<br>monument-national:NN<br>formations-rock:NSUBJ       |
| 162   |  | clouds,mountains,beach<br>view,mountains,landscape<br>sky,green,landscape<br>aerial,blue,sea<br>landscape,mountains,mountain    | mountains-rocky:NN<br>root-peak:ROOT<br>feet-:NUM<br>valley-death:NN<br>field-lava:NN<br>floor-valley:NN<br>mountain-white:AMOD<br>canyon-the:DET<br>mountain-green:AMOD<br>root-views:ROOT<br>bed-lake:NN<br>layers-the:DET<br>mountain-distance:PREP_IN<br>root-rocks:ROOT<br>root-layers:ROOT    |

Continued on next page

**Table1 – continued from previous page**

| Index | Image                                                                               | NUS-WIDE Concepts                                                                                                                 | SBU Concepts                                                                                                                                                                                                                                                                                                                          |
|-------|-------------------------------------------------------------------------------------|-----------------------------------------------------------------------------------------------------------------------------------|---------------------------------------------------------------------------------------------------------------------------------------------------------------------------------------------------------------------------------------------------------------------------------------------------------------------------------------|
| 163   |    | speed,night,light<br>dynamic,night,digital<br>flying,california,pilot<br>historical,war,germany<br>malaysia,architecture,building | line-the:DET<br>root-passes:ROOT<br>train-an:DET<br>root-stand:ROOT<br>passes-train:NSUBJ<br>crosses-train:NSUBJ<br>station-street:NN<br>yard-train:NN<br>view-closer:AMOD<br>train-a:DET<br>tracks-train:NN<br>track-the:DET<br>station-main:AMOD<br>train-passenger:NN<br>line-a:DET                                                |
| 164   |   | engine,clouds,sky<br>virginia,railroad,train<br>locomotive,bridge,track<br>chapel,buildings,design<br>graffiti,city,architecture  | railroad-the:DET<br>tracks-railroad:NN<br>root-mill:ROOT<br>covered-bridge:DOBJ<br>house-school:NN<br>depot-the:DET<br>house-to:AUX<br>view-front:AMOD<br>house-town:PREP_IN<br>house-pump:NN<br>building-small:AMOD<br>depot-train:NN<br>built-church:NSUBJPASS<br>house-beach:PREP_NEAR<br>house-black:AMOD                         |
| 165   |  | palace,madrid,night<br>panorama,sea,water<br>plaza,europa,church<br>cathedral,sky,city<br>belgium,sigma,explore                   | view-castle:PREP_OF<br>castle-the:DET<br>built-century:PREP_IN<br>root-palace:ROOT<br>house-century:NN<br>house-state:NN<br>building-historic:AMOD<br>house-building:NSUBJ<br>fortress-the:DET<br>castle-background:PREP_IN<br>house-building:DEP<br>building-government:NN<br>root-castle:ROOT<br>city-old:AMOD<br>bridge-charles:NN |

Continued on next page



Table1 – continued from previous page

| Index | Image                                                                               | NUS-WIDE Concepts                                                                                                  | SBU Concepts                                                                                                                                                                                                                                                                                               |
|-------|-------------------------------------------------------------------------------------|--------------------------------------------------------------------------------------------------------------------|------------------------------------------------------------------------------------------------------------------------------------------------------------------------------------------------------------------------------------------------------------------------------------------------------------|
| 166   |    | restaurant,street,people<br>work,office,apple<br>chair,room,office<br>interior,furniture,house<br>office,apple,mac | table-window:PREP_BY<br>root-lounge:ROOT<br>kitchen-house:PREP_IN<br>area-bar:NN<br>tables-chairs:CONJ_AND<br>lounge-the:DET<br>kitchen-house:NN<br>fireplace-the:DET<br>room-house:PREP_OF<br>shopping-window:NN<br>bar-little:AMOD<br>chairs-the:DET<br>tv-screen:NN<br>room-family:NN<br>read-book:DOBJ |
| 167   |   | ship,sail,sailing<br>port,ships,boats<br>sail,harbor,port<br>oil,night,ship<br>oilfield,indonesia,sunrise          | ship-an:DET<br>root-ship:ROOT<br>taken-camera:PREP_WITH<br>root-ships:ROOT<br>root-images:ROOT<br>crane-the:DET<br>ship-tall:AMOD<br>pass-to:AUX<br>root-home:ROOT<br>root-wheel:ROOT<br>port-the:DET<br>collection-the:DET<br>roof-house:NN<br>ship-pirate:AMOD<br>ship-old:AMOD                          |
| 168   |  | mare,sunset,sun<br>fishing,sunset,reflection<br>boat,sunset,sun<br>waves,sunset,clouds<br>sunrise,reflection,sea   | sun-the:DET<br>bay-the:DET<br>taken-beach:PREP_FROM<br>cruise-a:DET<br>root-sunrise:ROOT<br>sets-sun:NSUBJ<br>sets-as:MARK<br>sky-water:CONJ_AND<br>sunset-over:PRT<br>sunset-golden:AMOD<br>beach-long:AMOD<br>sun-evening:NN<br>root-sets:ROOT<br>middle-lake:PREP_OF<br>setting-sun:NSUBJ               |

Continued on next page

**Table1 – continued from previous page**

| Index                  | Image                                                                               | NUS-WIDE Concepts                                                                                                   | SBU Concepts                                                                                                                                                                                                                                                                                                         |
|------------------------|-------------------------------------------------------------------------------------|---------------------------------------------------------------------------------------------------------------------|----------------------------------------------------------------------------------------------------------------------------------------------------------------------------------------------------------------------------------------------------------------------------------------------------------------------|
| 169                    |    | green,sky,clouds<br>golf,spain,flag<br>golf,blue,yellow<br>rice,landscape,field<br>blur,water,sky                   | green-so:ADVMOD<br>ocean-background:PREP_IN<br>root-field:ROOT<br>fields-green:AMOD<br>field-green:AMOD<br>green-very:ADVMOD<br>green-blue:CONJ_AND<br>root-gardens:ROOT<br>green-the:DET<br>field-soccer:NN<br>clock-flower:NN<br>space-green:AMOD<br>hillside-the:DET<br>house-distance:PREP_IN<br>root-green:ROOT |
| 170                    |   | vintage,pink,handmade<br>airforce,museum,flag<br>ontario,mall,city<br>submarine,yellow,art<br>formula,classic,sport | root-display:ROOT<br>car-yellow:AMOD<br>machine-the:DET<br>root-cars:ROOT<br>root-machine:ROOT<br>cabinet-kitchen:NN<br>machine-washing:AMOD<br>box-shoe:NN<br>sign-glass:NN<br>window-store:NN<br>mural-wall:PREP_ON<br>shape-good:AMOD<br>display-window:NSUBJ<br>machine-green:AMOD<br>cabinet-a:DET              |
| 171                    |  | truck,sky,clouds<br>cars,urban,buildings<br>metro,texas,high<br>tanks,oil,sunset<br>memorial,sunset,blue            | road-beach:NN<br>building-distance:PREP_IN<br>street-house:PREP_NEAR<br>root-flood:ROOT<br>looking-road:DOBJ<br>one-roads:PREP_OF<br>truck-white:AMOD<br>root-roads:ROOT<br>looking-street:DOBJ<br>car-driving:VMOD<br>trailer-a:DET<br>over-bridge:POBJ<br>root-truck:ROOT<br>lined-street:DOBJ<br>court-ball:NN    |
| Continued on next page |                                                                                     |                                                                                                                     |                                                                                                                                                                                                                                                                                                                      |

Table1 – continued from previous page

| Index                  | Image                                                                               | NUS-WIDE Concepts                                                                                                  | SBU Concepts                                                                                                                                                                                                                                                                                                    |
|------------------------|-------------------------------------------------------------------------------------|--------------------------------------------------------------------------------------------------------------------|-----------------------------------------------------------------------------------------------------------------------------------------------------------------------------------------------------------------------------------------------------------------------------------------------------------------|
| 172                    | 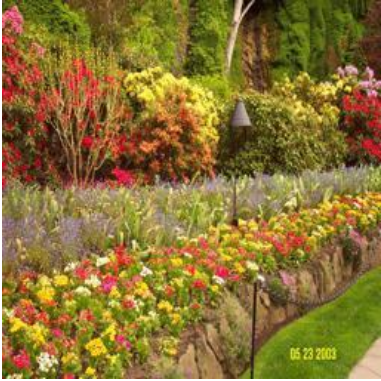   | gardens,trees,tree<br>flowers,spring,landscape<br>spring,trees,landscape<br>fall,tree,forest<br>tulip,color,orange | beds-flower:NN<br>flower-bed:DEP<br>trees-fruit:NN<br>root-garden:ROOT<br>flowers-front:PREP_IN<br>tree-maple:NN<br>flowers-bloom:PREP_IN<br>flowers-bed:PREP_IN<br>pretty-flowers:DEP<br>bed-yard:PREP_IN<br>gardens-the:DET<br>root-bush:ROOT<br>foliage-the:DET<br>beautiful-flowers:DOBJ<br>berries-the:DET |
| 173                    |   | hotel,room,street<br>history,museum,historical<br>funny,people,day<br>shop,market,food<br>cheese,night,smile       | root-bar:ROOT<br>stand-fruit:NSUBJ<br>bar-little:AMOD<br>market-local:AMOD<br>root-market:ROOT<br>bar-a:DET<br>root-stand:ROOT<br>tables-chairs:CONJ_AND<br>display-window:NN<br>market-small:AMOD<br>fruit-fresh:AMOD<br>market-the:DET<br>market-air:NN<br>dogs-hot:AMOD<br>stall-market:NN                   |
| 174                    |  | breathtaking,blue,animal<br>greece,white,art<br>diving,boats,blue<br>hiking,wildlife,tree<br>gardens,trees,tree    | root-forms:ROOT<br>park-creek:NN<br>bed-creek:NN<br>bed-river:NN<br>walls-stone:NN<br>rocks-river:PREP_IN<br>bed-stream:NN<br>river-park:PREP_IN<br>root-track:ROOT<br>water-flowing:VMOD<br>tree-river:PREP_IN<br>water-river:PREP_IN<br>stone-wall:DEP<br>root-texture:ROOT<br>root-ripples:ROOT              |
| Continued on next page |                                                                                     |                                                                                                                    |                                                                                                                                                                                                                                                                                                                 |

**Table1 – continued from previous page**

| Index                  | Image                                                                               | NUS-WIDE Concepts                                                                                                         | SBU Concepts                                                                                                                                                                                                                                                                                                       |
|------------------------|-------------------------------------------------------------------------------------|---------------------------------------------------------------------------------------------------------------------------|--------------------------------------------------------------------------------------------------------------------------------------------------------------------------------------------------------------------------------------------------------------------------------------------------------------------|
| 175                    |    | autumn,landscape,sky<br>woods,landscape,sky<br>fall,landscape,sky<br>fence,grass,field<br>october,landscape,nature        | root-field:ROOT<br>grass-trees:CONJ_AND<br>pasture-horse:NN<br>pasture-a:DET<br>house-distance:PREP_IN<br>pasture-the:DET<br>space-green:AMOD<br>trees-two:NUM<br>field-green:AMOD<br>top-hill:NN<br>tree-single:AMOD<br>autumn-the:DET<br>countryside-the:DET<br>field-front:PREP_IN<br>road-house:PREP_FROM      |
| 176                    |   | design,interior,furniture<br>chairs,interior,office<br>interior,furniture,house<br>cafe,bar,street<br>painting,night,wall | room-dining:NN<br>dining-room:DOBJ<br>tables-chairs:CONJ_AND<br>looking-room:PREP_INTO<br>room-great:AMOD<br>tables-the:DET<br>kitchen-house:PREP_OF<br>living-room:DOBJ<br>fireplace-the:DET<br>room-new:AMOD<br>root-bar:ROOT<br>room-the:DET<br>room-house:PREP_IN<br>room-living:AMOD<br>table-chairs:CONJ_AND |
| 177                    |  | cactus,desert,arizona<br>flora,trees,tree<br>forest,mountains,clouds<br>land,river,mountains<br>waterways,marsh,landscape | mountains-blue:AMOD<br>pine-tree:DOBJ<br>root-trail:ROOT<br>trees-green:AMOD<br>root-forest:ROOT<br>fork-the:DET<br>root-trees:ROOT<br>season-rainy:AMOD<br>trees-all:PREDET<br>trees-olive:AMOD<br>forest-rain:NN<br>tree-one:NUM<br>view-trees:PREP_OF<br>trees-few:AMOD<br>hillside-the:DET                     |
| Continued on next page |                                                                                     |                                                                                                                           |                                                                                                                                                                                                                                                                                                                    |



**Table1 – continued from previous page**

| Index                  | Image                                                                               | NUS-WIDE Concepts                                                                                                     | SBU Concepts                                                                                                                                                                                                                                                                                                 |
|------------------------|-------------------------------------------------------------------------------------|-----------------------------------------------------------------------------------------------------------------------|--------------------------------------------------------------------------------------------------------------------------------------------------------------------------------------------------------------------------------------------------------------------------------------------------------------|
| 178                    |    | ice,trees,canada<br>police,england,city<br>game,night,ball<br>cheering,concert,city<br>stadium,green,field            | seats-the:DET<br>game-the:DET<br>seats-box:NN<br>best-seats:DEP<br>seats-house:PREP_IN<br>root-tables:ROOT<br>stage-the:DET<br>plate-home:NN<br>person-walking:VMOD<br>view-of:PREP<br>head-street:PREP_IN<br>root-game:ROOT<br>airport-the:DET<br>stadium-the:DET<br>root-people:ROOT                       |
| 179                    |   | lake,mountains,mountain<br>island,landscape,sky<br>arctic,norway,sky<br>scenery,mountains,mountain<br>bay,sunset,sun  | root-lake:ROOT<br>water-sky:CONJ_AND<br>dots-black:AMOD<br>lake-water:NN<br>coast-east:AMOD<br>lake-mountains:CONJ_AND<br>stretch-a:DET<br>sky-water:CONJ_AND<br>seen-distance:PREP_IN<br>looking-lake:PREP_OVER<br>lake-a:DET<br>lake-the:DET<br>blues-the:DET<br>down-beach:PREP_TO<br>lake-middle:PREP_IN |
| 180                    |  | hill,italy,italia<br>countryside,clouds,green<br>fields,scotland,blue<br>landscape,field,green<br>sheep,landscape,sky | walls-stone:NN<br>hill-the:DET<br>root-hills:ROOT<br>middle-field:PREP_OF<br>side-hill:NN<br>fields-green:AMOD<br>view-hill:PREP_FROM<br>root-sheep:ROOT<br>fields-the:DET<br>root-pasture:ROOT<br>district-lake:NN<br>view-road:PREP_FROM<br>farm-a:DET<br>hill-house:PREP_NEAR<br>hills-the:DET            |
| Continued on next page |                                                                                     |                                                                                                                       |                                                                                                                                                                                                                                                                                                              |

**Table1 – continued from previous page**

| Index                  | Image                                                                               | NUS-WIDE Concepts                                                                                                                 | SBU Concepts                                                                                                                                                                                                                                                                                                     |
|------------------------|-------------------------------------------------------------------------------------|-----------------------------------------------------------------------------------------------------------------------------------|------------------------------------------------------------------------------------------------------------------------------------------------------------------------------------------------------------------------------------------------------------------------------------------------------------------|
| 181                    |    | coast,nature,rocks<br>cliff,blue,landscape<br>earthquake,copyright,malaysia<br>desert,utah,mountains<br>island,landscape,sky      | center-picture:PREP_OF<br>view-hill:PREP_FROM<br>cliffs-red:AMOD<br>view-castle:PREP_FROM<br>middle-photo:PREP_OF<br>border-the:DET<br>river-snake:NN<br>taken-road:PREP_FROM<br>side-hill:NN<br>root-africa:ROOT<br>highway-coast:NN<br>harbor-bar:NN<br>hills-the:DET<br>lake-water:NN<br>season-rainy:AMOD    |
| 182                    |   | entrance,red,blue<br>shopping,night,street<br>lighting,architecture,interior<br>interior,light,museum<br>room>window,abandoned    | area-floor:NN<br>under-bridge:POBJ<br>window-big:AMOD<br>area-lounge:NN<br>corner-the:DET<br>camera-phone:NN<br>view-kitchen:PREP_FROM<br>window-picture:NN<br>looks-window:NSUBJ<br>window-bay:NN<br>wall-back:AMOD<br>floor-top:AMOD<br>master-the:DET<br>window-kitchen:PREP_IN<br>root-balcony:ROOT          |
| 183                    |  | floor>window,interior<br>room>window,abandoned<br>carpet,room,chair<br>interior,furniture,house<br>lighting,architecture,interior | root-master:ROOT<br>floor-wood:NN<br>root-bedroom:ROOT<br>leads-door:NSUBJ<br>root-room:ROOT<br>master-the:DET<br>root-downstairs:ROOT<br>living-room:DOBJ<br>standing-bedroom:PREP_IN<br>bedroom-house:PREP_IN<br>part-house:PREP_OF<br>standing-room:PREP_IN<br>room-bed:NN<br>suite-the:DET<br>area-office:NN |
| Continued on next page |                                                                                     |                                                                                                                                   |                                                                                                                                                                                                                                                                                                                  |

**Table1 – continued from previous page**

| Index | Image                                                                               | NUS-WIDE Concepts                                                                                                       | SBU Concepts                                                                                                                                                                                                                                                                                                                         |
|-------|-------------------------------------------------------------------------------------|-------------------------------------------------------------------------------------------------------------------------|--------------------------------------------------------------------------------------------------------------------------------------------------------------------------------------------------------------------------------------------------------------------------------------------------------------------------------------|
| 184   |    | painting,artist,colors<br>artist,flowers,pink<br>display,art,store<br>host,high,school<br>kids,art,baby                 | window-shop:PREP_OF<br>cabinet-glass:NN<br>window-restaurant:PREP_OF<br>hanging-window:PREP_IN<br>root-decoration:ROOT<br>collection-a:DET<br>display-window:NSUBJ<br>collection-the:DET<br>root-display:ROOT<br>wall-house:PREP_IN<br>glass-art:NN<br>shelves-the:DET<br>in-window:POBJ<br>root-panel:ROOT<br>work-progress:PREP_IN |
| 185   |   | carpet,room,chair<br>decoration,home,room<br>floor>window,interior<br>studio,microphones,office<br>cottage,vintage,pink | room-kitchen:CONJ_AND<br>room-house:PREP_IN<br>room-main:AMOD<br>room-family:NN<br>room-living:AMOD<br>room-great:AMOD<br>looking-room:PREP_INTO<br>basement-the:DET<br>floor-room:PREP_IN<br>room-floor:NN<br>root-room:ROOT<br>bedroom-house:PREP_IN<br>corner-house:PREP_OF<br>room-new:AMOD<br>carpet-the:DET                    |
| 186   |  | ship,sunset,clouds<br>boat,river,boats<br>water,boat,river<br>sailing,clouds,sky<br>flight,plane,aviation               | boat-white:AMOD<br>boats-water:PREP_IN<br>harbor-the:DET<br>root-ships:ROOT<br>ferry-a:DET<br>bay-the:DET<br>boat-river:PREP_IN<br>ship-an:DET<br>boat-bay:PREP_IN<br>ship-cruise:NSUBJ<br>root-harbor:ROOT<br>beach-long:AMOD<br>boats-many:AMOD<br>root-sailboat:ROOT<br>ship-background:PREP_IN                                   |

Continued on next page

**Table1 – continued from previous page**

| Index                  | Image                                                                               | NUS-WIDE Concepts                                                                                                                   | SBU Concepts                                                                                                                                                                                                                                                                                                                |
|------------------------|-------------------------------------------------------------------------------------|-------------------------------------------------------------------------------------------------------------------------------------|-----------------------------------------------------------------------------------------------------------------------------------------------------------------------------------------------------------------------------------------------------------------------------------------------------------------------------|
| 187                    |    | waterways,night,light<br>bridges,travel,steel<br>bridge,california,night<br>harbor,boat,ship<br>barge,harbour,sea                   | bridge-bridge:NSUBJ<br>shot-bridge:PREP_OF<br>bridge-famous:AMOD<br>crosses-river:DOBJ<br>boat-bridge:PREP_UNDER<br>bridge-river:NN<br>tour-boat:NN<br>taken-bridge:NSUBJ<br>passing-bridge:PREP_UNDER<br>cruise-a:DET<br>bridge-lake:PREP_OVER<br>span-the:DET<br>bridge-blue:AMOD<br>view-boat:PREP_FROM<br>canal-ship:NN |
| 188                    |   | chair,furniture,blue<br>paper,architecture,model<br>model,architecture,design<br>hospital,white,bird<br>bathroom,abandoned,interior | towels-paper:NN<br>root-bathroom:ROOT<br>root-toilet:ROOT<br>towels-the:DET<br>toilet-the:DET<br>paper-toilet:NN<br>shape-a:DET<br>bathroom-the:DET<br>chair-white:AMOD<br>towel-paper:NN<br>sink-bathroom:PREP_IN<br>root-fits:ROOT<br>machine-washing:AMOD<br>animal-towel:NN<br>tiles-floor:NN                           |
| 189                    |  | abandoned,ruin,factory<br>urban,abandoned,night<br>decay,light,ruin<br>blur,water,sky<br>jail,decay,film                            | basement-the:DET<br>wall-back:AMOD<br>root-bedroom:ROOT<br>barn-the:DET<br>window-big:AMOD<br>root-bar:ROOT<br>standing-water:DOBJ<br>system-water:NN<br>house-family:NN<br>view-of:PREP<br>room-main:AMOD<br>window-front:NN<br>area-bar:NN<br>root-front:ROOT<br>covered-floor:NSUBJPASS                                  |
| Continued on next page |                                                                                     |                                                                                                                                     |                                                                                                                                                                                                                                                                                                                             |



Table1 – continued from previous page

| Index                  | Image                                                                               | NUS-WIDE Concepts                                                                                                                 | SBU Concepts                                                                                                                                                                                                                                                                                                                                     |
|------------------------|-------------------------------------------------------------------------------------|-----------------------------------------------------------------------------------------------------------------------------------|--------------------------------------------------------------------------------------------------------------------------------------------------------------------------------------------------------------------------------------------------------------------------------------------------------------------------------------------------|
| 190                    |    | house,architecture,historic<br>shrine,gate,sunset<br>home,architecture,door<br>cottage,garden,architecture<br>barge,england,canal | root-temple:ROOT<br>house-little:AMOD<br>building-wooden:AMOD<br>house-mountains:PREP_IN<br>house-hill:PREP_IN<br>house-street:PREP_ON<br>looks-house:NSUBJ<br>covered-bridge:DOBJ<br>house-neighborhood:PREP_IN<br>root-house:ROOT<br>surrounded-trees:AGENT<br>bridge-covered:AMOD<br>house-cute:AMOD<br>cute-house:DOBJ<br>house-lake:PREP_ON |
| 191                    |   | morning,people,coffee<br>interesting,portrait,people<br>trip,summer,people<br>holiday,christmas,fun<br>environment,rally,democrat | screen-tv:NN<br>screen-blue:AMOD<br>screen-video:AMOD<br>screen-big:AMOD<br>screen-the:DET<br>video-a:DET<br>office-new:AMOD<br>lab-computer:NN<br>video-the:DET<br>screen-a:DET<br>computer-a:DET<br>sitting-desk:PREP_AT<br>place-pizza:NN<br>laptop-a:DET<br>book-new:AMOD                                                                    |
| 192                    |  | tower,europe,france<br>building,church,europe<br>heritage,trip,church<br>church,sky,building<br>historic,house,texas              | tower-clock:NN<br>tower-bell:NN<br>tower-church:NN<br>tower-church:PREP_OF<br>tower-square:PREP_IN<br>hall-town:NN<br>root-bell:ROOT<br>tower-building:PREP_OF<br>face-clock:NN<br>tower-town:PREP_IN<br>root-clock:ROOT<br>clock-a:DET<br>bell-the:DET<br>tower-city:PREP_IN<br>towers-one:NSUBJ                                                |
| Continued on next page |                                                                                     |                                                                                                                                   |                                                                                                                                                                                                                                                                                                                                                  |

**Table1 – continued from previous page**

| Index                  | Image                                                                               | NUS-WIDE Concepts                                                                                                                               | SBU Concepts                                                                                                                                                                                                                                                                                                                                      |
|------------------------|-------------------------------------------------------------------------------------|-------------------------------------------------------------------------------------------------------------------------------------------------|---------------------------------------------------------------------------------------------------------------------------------------------------------------------------------------------------------------------------------------------------------------------------------------------------------------------------------------------------|
| 193                    |    | sea,landscape,clouds<br>oahu,surf,waves<br>tropical,beach,island<br>natural,sea,ocean<br>beach,landscape,clouds                                 | beach-beautiful:AMOD<br>beach-house:PREP_BY<br>beach-private:AMOD<br>beach-sand:NN<br>beach-background:PREP_IN<br>beach-house:PREP_NEAR<br>view-beach:PREP_OF<br>beach-sandy:AMOD<br>one-beaches:PREP_OF<br>sand-white:AMOD<br>beach-bay:NN<br>dunes-sand:NN<br>root-beach:ROOT<br>beach-white:AMOD<br>sea-blue:AMOD                              |
| 194                    |   | downtown,building,blue<br>maryland,architecture,buildings<br>modern,skyscraper,buildings<br>buildings,building,travel<br>stone,architecture,old | building-office:NN<br>building-large:AMOD<br>building-new:NN<br>building-cool:AMOD<br>building-background:PREP_IN<br>building-the:DET<br>building-black:AMOD<br>tower-office:NN<br>building-an:DET<br>building-brown:AMOD<br>buildings-the:DET<br>towers-office:NN<br>root-theater:ROOT<br>building-street:PREP_ACROSS<br>building-london:PREP_IN |
| 195                    |  | interior,furniture,house<br>carpet,room,chair<br>furniture,architecture,interior<br>design,interior,furniture<br>decoration,home,room           | leads-door:NSUBJ<br>house-bedroom:AMOD<br>room-family:NN<br>root-guest:ROOT<br>looking-room:PREP_INTO<br>area-office:NN<br>standing-door:PREP_IN<br>root-room:ROOT<br>room-kitchen:CONJ_AND<br>root-downstairs:ROOT<br>room-house:PREP_IN<br>carpet-the:DET<br>living-room:DOBJ<br>area-bar:NN<br>root-master:ROOT                                |
| Continued on next page |                                                                                     |                                                                                                                                                 |                                                                                                                                                                                                                                                                                                                                                   |

Table1 – continued from previous page

| Index                  | Image                                                                               | NUS-WIDE Concepts                                                                                                               | SBU Concepts                                                                                                                                                                                                                                                                                                             |
|------------------------|-------------------------------------------------------------------------------------|---------------------------------------------------------------------------------------------------------------------------------|--------------------------------------------------------------------------------------------------------------------------------------------------------------------------------------------------------------------------------------------------------------------------------------------------------------------------|
| 196                    |    | underwater,coral,nature<br>scuba,coral,nature<br>diving,nature,coral<br>reef,scuba,nature<br>crab,animals,coral                 | root-crab:ROOT<br>fish-lion:NN<br>reef-the:DET<br>lake-clear:AMOD<br>tree-colorful:AMOD<br>tree-blue:AMOD<br>fish-aquarium:PREP_IN<br>sea-red:AMOD<br>fish-colorful:AMOD<br>sea-red:NN<br>head-street:PREP_IN<br>leaves-autumn:NSUBJ<br>floating-water:PREP_IN<br>root-cherry:ROOT<br>fish-tank:PREP_IN                  |
| 197                    |   | sport,water,sea<br>tennis,green,lines<br>golf,spain,flag<br>football,stadium,sport<br>lawn,clouds,landscape                     | field-ball:NN<br>field-center:NN<br>water-green:AMOD<br>field-soccer:NN<br>plate-home:NN<br>track-the:DET<br>view-field:PREP_OF<br>wall-field:NN<br>view-road:PREP_OF<br>green-so:ADVMOD<br>field-green:AMOD<br>green-the:DET<br>view-scenic:AMOD<br>front-car:PREP_OF<br>fields-green:AMOD                              |
| 198                    |  | steps,green,red<br>garden,trees,tree<br>apartments,pool,swimming<br>maryland,architecture,buildings<br>houses,building,historic | porch-the:DET<br>root-garden:ROOT<br>porch-front:AMOD<br>root-balcony:ROOT<br>street-side:NN<br>house-park:PREP_IN<br>building-apartment:NN<br>courtyard-a:DET<br>root-deck:ROOT<br>floor-third:AMOD<br>house-stayed:RCMOD<br>boxes-window:NN<br>pictures-streets:PREP_OF<br>house-street:PREP_ON<br>view-room:PREP_FROM |
| Continued on next page |                                                                                     |                                                                                                                                 |                                                                                                                                                                                                                                                                                                                          |

**Table1 – continued from previous page**

| Index                  | Image                                                                               | NUS-WIDE Concepts                                                                                                              | SBU Concepts                                                                                                                                                                                                                                                                                       |
|------------------------|-------------------------------------------------------------------------------------|--------------------------------------------------------------------------------------------------------------------------------|----------------------------------------------------------------------------------------------------------------------------------------------------------------------------------------------------------------------------------------------------------------------------------------------------|
| 199                    |    | wales,trees,explore<br>army,mountains,abandoned<br>tourist,temple,portugal<br>ruins>window,decay<br>monks,monastery,church     | house-castle:NN<br>built-century:PREP_IN<br>view-castle:PREP_OF<br>castle-the:DET<br>stone-the:DET<br>walls-castle:NN<br>century-the:DET<br>stones-the:DET<br>root-village:ROOT<br>hill-castle:NN<br>houses-built:VMOD<br>root-castle:ROOT<br>on-hill:POBJ<br>fortress-the:DET<br>grass-green:AMOD |
| 200                    |   | war,ship,history<br>netherlands,landscape,trees<br>roadblock,water,tree<br>soldier,mountains,marine<br>elephants,sunset,travel | side-hill:NN<br>season-rainy:AMOD<br>tanks-water:NN<br>sign-hollywood:NN<br>lion-female:AMOD<br>dam-a:DET<br>fort-the:DET<br>nursery-a:DET<br>bricks-the:DET<br>wall-garden:NN<br>field-front:PREP_IN<br>hill-small:AMOD<br>trees-olive:AMOD<br>house-country:NN<br>distance-far:AMOD              |
| 201                    |  | work,office,apple<br>office,apple,mac<br>cabin,airplane,plane<br>airport,travel,architecture<br>carpet,room,chair              | lounge-the:DET<br>lab-computer:NN<br>lab-the:DET<br>area-bar:NN<br>area-lounge:NN<br>screen-a:DET<br>windows-room:PREP_IN<br>bar-floor:NN<br>table-window:PREP_BY<br>screen-big:AMOD<br>table-bar:PREP_IN<br>screen-blue:AMOD<br>monitor-the:DET<br>bar-little:AMOD<br>train-sky:NN                |
| Continued on next page |                                                                                     |                                                                                                                                |                                                                                                                                                                                                                                                                                                    |



**Table1 – continued from previous page**

| Index                  | Image                                                                               | NUS-WIDE Concepts                                                                                                            | SBU Concepts                                                                                                                                                                                                                                                                                                       |
|------------------------|-------------------------------------------------------------------------------------|------------------------------------------------------------------------------------------------------------------------------|--------------------------------------------------------------------------------------------------------------------------------------------------------------------------------------------------------------------------------------------------------------------------------------------------------------------|
| 202                    |    | greece,church,square<br>rocks,blue,mountains<br>castle,architecture,europe<br>castle,water,scotland<br>ancient,pyramid,egypt | castle-hill:PREP_ON<br>castle-the:DET<br>view-castle:PREP_OF<br>castle-an:DET<br>root-castle:ROOT<br>view-rock:PREP_OF<br>castle-old:AMOD<br>view-castle:PREP_FROM<br>root-cliffs:ROOT<br>castle-a:DET<br>view-hill:PREP_FROM<br>hill-castle:NN<br>house-hill:PREP_ON<br>hillside-the:DET<br>side-mountain:PREP_OF |
| 203                    |   | cafe,bar,street<br>restaurant,street,people<br>mall,shop,ontario<br>italia,people,street<br>cruise,digital,photo             | root-bar:ROOT<br>area-bar:NN<br>bar-little:AMOD<br>lounge-the:DET<br>area-lounge:NN<br>car-dining:NN<br>root-lounge:ROOT<br>car-train:NN<br>room-main:AMOD<br>root-suite:ROOT<br>root-corridor:ROOT<br>floor-dance:NN<br>office-box:NN<br>area-floor:NN<br>fireplace-the:DET                                       |
| 204                    |  | market,vegetables,red<br>vegetables,color,people<br>fruit,market,vegetables<br>hotel,room,street<br>orange,white,macro       | market-flower:NN<br>fruit-market:CONJ_AND<br>root-fruit:ROOT<br>fruit-market:PREP_IN<br>market-fruit:NN<br>market-vegetable:NN<br>market-an:DET<br>market-farmers:NN<br>market-outdoor:AMOD<br>stall-market:NN<br>market-farmer:POSS<br>fruit-the:DET<br>flower-market:DEP<br>market-a:DET<br>flowers-orange:AMOD  |
| Continued on next page |                                                                                     |                                                                                                                              |                                                                                                                                                                                                                                                                                                                    |

**Table1 – continued from previous page**

| Index                  | Image                                                                               | NUS-WIDE Concepts                                                                                                                        | SBU Concepts                                                                                                                                                                                                                                                                                                                                            |
|------------------------|-------------------------------------------------------------------------------------|------------------------------------------------------------------------------------------------------------------------------------------|---------------------------------------------------------------------------------------------------------------------------------------------------------------------------------------------------------------------------------------------------------------------------------------------------------------------------------------------------------|
| 205                    |    | countryside,clouds,green<br>landscape,field,green<br>waterways,marsh,landscape<br>landscapes,scenery,countryside<br>fields,scotland,blue | root-field:ROOT<br>field-front:PREP_IN<br>countryside-the:DET<br>field-the:DET<br>hill-a:DET<br>view-hill:PREP_FROM<br>top-hill:NN<br>hill-green:AMOD<br>hill-small:AMOD<br>house-distance:PREP_IN<br>house-hill:PREP_ON<br>root-land:ROOT<br>tree-single:AMOD<br>hill-tree:NN<br>field-paddy:AMOD                                                      |
| 206                    |   | book,library,color<br>mall,shop,ontario<br>underground,people,street<br>library,explore,interestingness<br>shops,urban,japan             | books-the:DET<br>store-book:NN<br>books-library:PREP_IN<br>root-books:ROOT<br>store-the:DET<br>shelves-the:DET<br>lab-computer:NN<br>root-bar:ROOT<br>root-store:ROOT<br>classroom-the:DET<br>house-field:NN<br>street-shopping:NN<br>shop-book:NN<br>floor-library:PREP_OF<br>station-bus:NN                                                           |
| 207                    |  | bridge,bridges,architecture<br>canal,italy,amsterdam<br>reflections,night,lights<br>canal,night,river<br>boats,reflections,reflection    | bridge-looking:VMOD<br>view-bridge:PREP_FROM<br>bridge-canal:PREP_OVER<br>bridge-river:PREP_OVER<br>standing-bridge:PREP_ON<br>bridge-water:DOBJ<br>bridge-an:DET<br>from-bridge:POBJ<br>looking-river:DOBJ<br>cross-bridge:NSUBJ<br>bridge-lake:PREP_OVER<br>bridge-old:AMOD<br>crossing-river:PREP_OVER<br>bridge-water:PREP_OVER<br>bridge-lake:DOBJ |
| Continued on next page |                                                                                     |                                                                                                                                          |                                                                                                                                                                                                                                                                                                                                                         |

Table1 – continued from previous page

| Index                  | Image                                                                               | NUS-WIDE Concepts                                                                                                            | SBU Concepts                                                                                                                                                                                                                                                                     |
|------------------------|-------------------------------------------------------------------------------------|------------------------------------------------------------------------------------------------------------------------------|----------------------------------------------------------------------------------------------------------------------------------------------------------------------------------------------------------------------------------------------------------------------------------|
| 208                    |    | concert,bar,caribou<br>music,scientists,microphones<br>night,clouds,stars<br>microphones,lights,festival<br>angel,fish,water | light-green:AMOD<br>buuren-van:NN<br>tank-fish:NN<br>tank-the:DET<br>buuren-video:DEP<br>light-white:AMOD<br>lights-green:AMOD<br>light-a:DET<br>root-smoke:ROOT<br>speed-shutter:NN<br>exposure-a:DET<br>lights-car:NN<br>phone-camera:NN<br>screen-a:DET<br>light-black:AMOD   |
| 209                    |   | snow,canada,skiing<br>car,automobile,truck<br>kuwait,car,cars<br>race,car,auto<br>jeep,sky,blue                              | root-cars:ROOT<br>cars-trucks:CONJ_AND<br>car-red:AMOD<br>house-car:CONJ_AND<br>cars-many:AMOD<br>root-van:ROOT<br>see-car:DOBJ<br>cars-two:NUM<br>car-one:NUM<br>trucks-the:DET<br>truck-red:AMOD<br>parked-car:NSUBJPASS<br>park-car:DOBJ<br>car-field:PREP_IN<br>snow-the:DET |
| 210                    |  | wave,sunset,sand<br>waves,rocks,coast<br>surf,coast,nature<br>hawaii,surf,kauai<br>aerial,blue,sea                           | wave-a:DET<br>root-waves:ROOT<br>surf-the:DET<br>water-white:AMOD<br>ice-the:DET<br>waves-the:DET<br>root-splash:ROOT<br>wave-the:DET<br>water-over:PRT<br>floor-ocean:NN<br>clouds-gray:AMOD<br>surface-the:DET<br>salmon-the:DET<br>reflection-sky:PREP_OF<br>in-water:POBJ    |
| Continued on next page |                                                                                     |                                                                                                                              |                                                                                                                                                                                                                                                                                  |

**Table1 – continued from previous page**

| Index                  | Image                                                                               | NUS-WIDE Concepts                                                                                                          | SBU Concepts                                                                                                                                                                                                                                                                                                                                                        |
|------------------------|-------------------------------------------------------------------------------------|----------------------------------------------------------------------------------------------------------------------------|---------------------------------------------------------------------------------------------------------------------------------------------------------------------------------------------------------------------------------------------------------------------------------------------------------------------------------------------------------------------|
| 211                    |    | library,explore,interestingness<br>shops,urban,japan<br>store,people,street<br>book,library,color<br>toys,display,home     | market-book:NN<br>books-the:DET<br>store-book:NN<br>shelves-the:DET<br>books-library:PREP_IN<br>root-books:ROOT<br>shops-the:DET<br>market-house:PREP_NEAR<br>shop-book:NN<br>shelf-book:NN<br>store-a:DET<br>street-market:NN<br>office-home:NN<br>street-an:DET<br>desk-the:DET                                                                                   |
| 212                    |   | traffic,lights,road<br>cars,urban,buildings<br>shops,urban,japan<br>barge,england,canal<br>road,city,people                | view-street:PREP_OF<br>streets-buildings:CONJ_AND<br>street-main:AMOD<br>street-front:PREP_IN<br>root-street:ROOT<br>pictures-pictures:NSUBJ<br>street-house:PREP_NEAR<br>looking-street:DOBJ<br>pictures-building:PREP_OF<br>pictures-streets:PREP_OF<br>root-pictures:ROOT<br>looking-road:DOBJ<br>building-walking:VMOD<br>station-the:DET<br>end-street:PREP_OF |
| 213                    |  | swimming,sky,trees<br>pool,apartments,architecture<br>suburban,arizona,landscape<br>signs,australia,nsw<br>nsw,coast,signs | root-main:ROOT<br>street-front:PREP_IN<br>court-ball:NN<br>view-road:PREP_OF<br>view-street:NN<br>road-up:ADVMOD<br>looking-street:DOBJ<br>tree-road:PREP_IN<br>road-red:AMOD<br>house-house:DEP<br>wall-retaining:AMOD<br>road-main:AMOD<br>building-distance:PREP_IN<br>building-white:AMOD<br>end-bridge:PREP_OF                                                 |
| Continued on next page |                                                                                     |                                                                                                                            |                                                                                                                                                                                                                                                                                                                                                                     |



**Table1 – continued from previous page**

| Index | Image                                                                               | NUS-WIDE Concepts                                                                                                           | SBU Concepts                                                                                                                                                                                                                                                                                                             |
|-------|-------------------------------------------------------------------------------------|-----------------------------------------------------------------------------------------------------------------------------|--------------------------------------------------------------------------------------------------------------------------------------------------------------------------------------------------------------------------------------------------------------------------------------------------------------------------|
| 214   |    | telephones,office,room<br>kitchen,woman,self<br>entrance,red,blue<br>studio,microphones,office<br>modern,interior,furniture | root-bar:ROOT<br>created-style:PREP_WITH<br>style-door:NN<br>area-lounge:NN<br>lab-computer:NN<br>room-living:AMOD<br>kitchen-new:AMOD<br>cabinets-the:DET<br>root-kitchen:ROOT<br>style-the:DET<br>kitchen-house:PREP_IN<br>lab-the:DET<br>root-theater:ROOT<br>basement-the:DET<br>kitchen-looking:VMOD                |
| 215   |   | restaurant,street,people<br>shops,urban,japan<br>cafe,bar,street<br>bar,city,cafe<br>post,night,street                      | street-side:NN<br>tables-chairs:CONJ_AND<br>scene-street:NN<br>street-an:DET<br>street-town:PREP_IN<br>market-the:DET<br>market-fruit:NN<br>village-the:DET<br>quarter-french:AMOD<br>place-market:NN<br>market-flower:NN<br>street-typical:AMOD<br>shopping-window:NN<br>table-chairs:CONJ_AND<br>root-market:ROOT      |
| 216   |  | stream,trees,sky<br>forest,mountains,clouds<br>photos,travel,landscape<br>woods,landscape,sky<br>holiday,architecture,trip  | wall-castle:PREP_OF<br>forest-rain:NN<br>river-running:VMOD<br>side-mountain:PREP_OF<br>mountains-blue:AMOD<br>framed-trees:PREP_BY<br>root-gorge:ROOT<br>mountain-rock:NN<br>gorge-the:DET<br>bridge-canyon:PREP_OVER<br>canyon-box:NN<br>root-castle:ROOT<br>house-hill:PREP_ON<br>castle-hill:PREP_ON<br>hike-the:DET |

Continued on next page

**Table1 – continued from previous page**

| Index                  | Image                                                                               | NUS-WIDE Concepts                                                                                                   | SBU Concepts                                                                                                                                                                                                                                                                                                       |
|------------------------|-------------------------------------------------------------------------------------|---------------------------------------------------------------------------------------------------------------------|--------------------------------------------------------------------------------------------------------------------------------------------------------------------------------------------------------------------------------------------------------------------------------------------------------------------|
| 217                    |    | cafe,bar,street<br>interior,light,museum<br>shops,fun,florida<br>underground,people,street<br>shopping,night,street | shopping-window:NN<br>frame-the:DET<br>fireplace-the:DET<br>root-office:ROOT<br>area-lounge:NN<br>area-office:NN<br>tables-chairs:CONJ_AND<br>office-building:PREP_IN<br>train-an:DET<br>basement-the:DET<br>shop-shoe:NN<br>station-street:NN<br>root-stairs:ROOT<br>apartments-the:DET<br>created-cherry:PREP_IN |
| 218                    |   | path,clouds,sky<br>grass,landscape,clouds<br>landscape,field,green<br>scotland,trees,fields<br>fence,grass,field    | field-cow:NN<br>hill-the:DET<br>top-hill:PREP_OF<br>house-hill:PREP_ON<br>hill-small:AMOD<br>dot-white:AMOD<br>view-park:PREP_IN<br>root-hill:ROOT<br>england-new:NN<br>stands-tree:NSUBJ<br>sits-tree:NSUBJ<br>top-hill:NN<br>castle-clouds:PREP_IN<br>green-so:ADVMOD<br>view-distance:PREP_IN                   |
| 219                    |  | cliff,blue,landscape<br>coast,nature,rocks<br>rocks,blue,mountains<br>island,landscape,sky<br>paradise,ocean,sea    | cliffs-the:DET<br>waters-blue:AMOD<br>cliff-a:DET<br>sand-beach:DEP<br>blue-water:NSUBJ<br>root-cliffs:ROOT<br>root-coast:ROOT<br>clear-crystal:ADVMOD<br>cliff-the:DET<br>view-castle:PREP_FROM<br>line-coast:NN<br>causeway-giant:POSS<br>distillery-coast:CONJ_AND<br>highway-coast:NN<br>color-water:PREP_OF   |
| Continued on next page |                                                                                     |                                                                                                                     |                                                                                                                                                                                                                                                                                                                    |

Table1 – continued from previous page

| Index | Image                                                                               | NUS-WIDE Concepts                                                                                                     | SBU Concepts                                                                                                                                                                                                                                                                                                           |
|-------|-------------------------------------------------------------------------------------|-----------------------------------------------------------------------------------------------------------------------|------------------------------------------------------------------------------------------------------------------------------------------------------------------------------------------------------------------------------------------------------------------------------------------------------------------------|
| 220   |    | bar,city,cafe<br>restaurant,street,people<br>cafe,bar,street<br>chair,room,office<br>classroom,california,apple       | area-bar:NN<br>table-pool:NN<br>table-bar:PREP_IN<br>table-house:PREP_IN<br>table-chairs:CONJ_AND<br>fireplace-the:DET<br>bar-the:DET<br>floor-dance:NN<br>tables-the:DET<br>bar-little:AMOD<br>root-tables:ROOT<br>table-window:PREP_BY<br>room-green:AMOD<br>tables-chairs:CONJ_AND<br>lounge-the:DET                |
| 221   |   | interior,light,museum<br>stairs,white,red<br>germany,architecture,subway<br>lines,urban,color<br>circle,color,pattern | root-staircase:ROOT<br>mirror-bathroom:PREP_IN<br>shade-lamp:NN<br>lamp-house:PREP_IN<br>root-stairs:ROOT<br>mirror-reflection:NSUBJ<br>lamp-room:PREP_IN<br>looking-floor:PREP_FROM<br>lamp-the:DET<br>paper-wall:NN<br>house-bath:NN<br>shell-a:DET<br>hung-wall:PREP_ON<br>root-basket:ROOT<br>root-photograph:ROOT |
| 222   |  | hats,cute,handmade<br>cake,groom,party<br>refugees,africa,boy<br>shops,fun,florida<br>sad,lonely,dog                  | display-window:NN<br>root-breakfast:ROOT<br>chicken-pot:PREP_IN<br>window-shop:NN<br>fruit-fresh:AMOD<br>eat-to:AUX<br>juice-orange:AMOD<br>house-tea:NN<br>bags-plastic:AMOD<br>bowl-big:AMOD<br>chocolate-white:AMOD<br>cloth-a:DET<br>basket-fruit:NN<br>root-dinner:ROOT<br>shirt-yellow:AMOD                      |

Continued on next page

Table1 – continued from previous page

| Index                  | Image                                                                               | NUS-WIDE Concepts                                                                                                        | SBU Concepts                                                                                                                                                                                                                                                                                                         |
|------------------------|-------------------------------------------------------------------------------------|--------------------------------------------------------------------------------------------------------------------------|----------------------------------------------------------------------------------------------------------------------------------------------------------------------------------------------------------------------------------------------------------------------------------------------------------------------|
| 223                    |    | mountains,trees,water<br>pakistan,snow,blue<br>hill,italy,italia<br>mountain,lake,green<br>tundra,colorado,mountain      | view-hill:PREP_FROM<br>side-hill:NN<br>center-picture:PREP_OF<br>hillside-the:DET<br>hills-the:DET<br>hills-green:AMOD<br>middle-picture:PREP_OF<br>crater-the:DET<br>valley-a:DET<br>walls-stone:NN<br>fields-green:AMOD<br>mountain-distance:PREP_IN<br>root-hills:ROOT<br>root-sheep:ROOT<br>mountains-green:AMOD |
| 224                    |   | interior,furniture,house<br>design,interior,furniture<br>decoration,home,room<br>guest,room,cat<br>room>window,abandoned | wall-back:AMOD<br>living-room:DOBJ<br>room-great:AMOD<br>leads-door:NSUBJ<br>house-bedroom:AMOD<br>root-room:ROOT<br>room-house:PREP_IN<br>room-main:AMOD<br>area-bar:NN<br>door-looking:VMOD<br>standing-looking:VMOD<br>window-door:CONJ_AND<br>looking-room:PREP_INTO<br>room-kitchen:CONJ_AND<br>chairs-two:NUM  |
| 225                    |  | dance,netherlands,holland<br>raft,pool,green<br>death,people,iraq<br>dancing,movement,color<br>stars,stripes,flag        | stage-the:DET<br>crowd-the:DET<br>root-girls:ROOT<br>parade-the:DET<br>theater-the:DET<br>floor-dance:NN<br>standing-the:DET<br>year-new:NN<br>rock-house:DOBJ<br>kids-the:DET<br>group-the:DET<br>shrine-the:DET<br>seats-box:NN<br>seat-house:PREP_IN<br>root-guy:ROOT                                             |
| Continued on next page |                                                                                     |                                                                                                                          |                                                                                                                                                                                                                                                                                                                      |



**Table1 – continued from previous page**

| Index                  | Image                                                                               | NUS-WIDE Concepts                                                                                                                | SBU Concepts                                                                                                                                                                                                                                                                                           |
|------------------------|-------------------------------------------------------------------------------------|----------------------------------------------------------------------------------------------------------------------------------|--------------------------------------------------------------------------------------------------------------------------------------------------------------------------------------------------------------------------------------------------------------------------------------------------------|
| 226                    |    | cliff,trees,hiking<br>mountains,trees,water<br>rock,blue,landscape<br>hiking,mountain,cliff<br>rocks,blue,mountains              | face-rock:NSUBJ<br>canyon-box:NN<br>root-formations:ROOT<br>face-rock:NN<br>floor-valley:NN<br>formations-rock:NSUBJ<br>side-mountain:PREP_OF<br>bridge-natural:AMOD<br>root-cliffs:ROOT<br>feet-:NUM<br>hillside-the:DET<br>cliff-the:DET<br>cliffs-the:DET<br>view-rock:PREP_OF<br>face-rock:PREP_IN |
| 227                    |   | door,architecture,stone<br>mosque,pakistan,spain<br>europe,architecture,church<br>palace,interior,india<br>arch,cathedral,church | door-main:AMOD<br>one-doors:PREP_OF<br>wall-west:AMOD<br>courtyard-a:DET<br>arch-the:DET<br>has-window:NSUBJ<br>corridor-a:DET<br>door-front:NN<br>door-windows:CONJ_AND<br>church-a:DET<br>marble-white:AMOD<br>glass-stained:AMOD<br>style-the:DET<br>window-one:PREP_IN<br>city-old:NN              |
| 228                    |  | tent,magic,war<br>sports,car,race<br>youth,brazil,brasil<br>bar,glasses,people<br>fan,portrait,dance                             | stage-the:DET<br>game-the:DET<br>band-rock:NN<br>girl-the:DET<br>shirt-green:AMOD<br>root-band:ROOT<br>shirt-yellow:AMOD<br>root-guy:ROOT<br>night-one:NUM<br>room-green:AMOD<br>seats-box:NN<br>screen-big:AMOD<br>women-the:DET<br>ball-the:DET<br>guy-the:DET                                       |
| Continued on next page |                                                                                     |                                                                                                                                  |                                                                                                                                                                                                                                                                                                        |

Table1 – continued from previous page

| Index | Image                                                                               | NUS-WIDE Concepts                                                                                                                  | SBU Concepts                                                                                                                                                                                                                                                                                                                          |
|-------|-------------------------------------------------------------------------------------|------------------------------------------------------------------------------------------------------------------------------------|---------------------------------------------------------------------------------------------------------------------------------------------------------------------------------------------------------------------------------------------------------------------------------------------------------------------------------------|
| 229   |    | interior,furniture,house<br>furniture,architecture,interior<br>home,interior,design<br>room,design,home<br>kitchen,interior,design | room-living:AMOD<br>room-family:NN<br>room-sitting:AMOD<br>living-room:DOBJ<br>room-kitchen:CONJ_AND<br>dining-room:DOBJ<br>see-door:DOBJ<br>room-great:AMOD<br>room-looking:VMOD<br>house-bedroom:AMOD<br>bedroom-house:PREP_OF<br>root-guest:ROOT<br>root-room:ROOT<br>root-bedroom:ROOT<br>door-looking:VMOD                       |
| 230   |   | bus,people,england<br>shops,urban,japan<br>shopping,night,street<br>traffic,lights,road<br>cafe,bar,street                         | street-typical:AMOD<br>root-street:ROOT<br>street-house:PREP_NEAR<br>street-city:PREP_IN<br>shops-the:DET<br>traffic-the:DET<br>street-town:PREP_IN<br>street-the:DET<br>corner-street:NN<br>truck-front:PREP_IN<br>street-a:DET<br>street-old:AMOD<br>street-small:AMOD<br>street-shopping:NN<br>station-the:DET                     |
| 231   |  | kitchen,woman,self<br>design,interior,furniture<br>telephones,office,room<br>hospital,people,california<br>creative,portfolio,pink | stove-kitchen:PREP_IN<br>kitchen-a:DET<br>kitchen-old:AMOD<br>kitchen-house:PREP_OF<br>desk-office:NN<br>kitchen-house:PREP_IN<br>sink-kitchen:PREP_IN<br>kitchen-house:PREP_AT<br>cat-kitchen:PREP_IN<br>kitchen-new:AMOD<br>root-desk:ROOT<br>root-counter:ROOT<br>machine-flying:AMOD<br>shelf-kitchen:PREP_IN<br>kitchen-house:NN |

Continued on next page

Table1 – continued from previous page

| Index                  | Image                                                                               | NUS-WIDE Concepts                                                                                                                     | SBU Concepts                                                                                                                                                                                                                                                                                                              |
|------------------------|-------------------------------------------------------------------------------------|---------------------------------------------------------------------------------------------------------------------------------------|---------------------------------------------------------------------------------------------------------------------------------------------------------------------------------------------------------------------------------------------------------------------------------------------------------------------------|
| 232                    |    | film,sky,urban<br>bridge,trees,landscape<br>bridge,bridges,architecture<br>glass,green,water<br>wales,trees,explore                   | bridge-bridge:NSUBJ<br>root-bridge:ROOT<br>view-bridge:PREP_OF<br>bridge-an:DET<br>ramp-boat:NN<br>river-ohio:NN<br>bridge-wooden:AMOD<br>bridge-bridge:CONJ_AND<br>crosses-bridge:NSUBJ<br>bridge-railway:NN<br>bridge-over:PRT<br>crossing-river:DOBJ<br>bridge-water:PREP_OVER<br>bridge-river:NN<br>root-crosses:ROOT |
| 233                    |   | maryland,architecture,buildings<br>fountain,architecture,europe<br>tourism,europe,trip<br>texas,high,metro<br>lawn,house,architecture | house-lovely:AMOD<br>root-house:ROOT<br>cute-house:DOBJ<br>house-beach:PREP_IN<br>house-pink:AMOD<br>house-town:PREP_IN<br>house-cute:AMOD<br>house-beautiful:AMOD<br>building-historic:AMOD<br>house-a:DET<br>house-big:AMOD<br>house-beach:PREP_NEAR<br>house-district:PREP_IN<br>root-home:ROOT<br>house-beach:PREP_BY |
| 234                    |  | island,travel,bird<br>trip,summer,people<br>shop,market,food<br>thailand,monks,burma<br>store,people,street                           | root-bar:ROOT<br>shirt-an:DET<br>girl-bar:PREP_IN<br>read-book:DOBJ<br>bar-the:DET<br>shopping-window:NN<br>book-new:AMOD<br>market-central:AMOD<br>shop-shoe:NN<br>train-sky:NN<br>market-place:NN<br>in-market:POBJ<br>me-house:PREP_IN<br>market-local:AMOD<br>town-china:NN                                           |
| Continued on next page |                                                                                     |                                                                                                                                       |                                                                                                                                                                                                                                                                                                                           |

**Table1 – continued from previous page**

| Index                  | Image                                                                               | NUS-WIDE Concepts                                                                                                | SBU Concepts                                                                                                                                                                                                                                                                                               |
|------------------------|-------------------------------------------------------------------------------------|------------------------------------------------------------------------------------------------------------------|------------------------------------------------------------------------------------------------------------------------------------------------------------------------------------------------------------------------------------------------------------------------------------------------------------|
| 235                    |    | pond,trees,reflections<br>paradise,ocean,sea<br>holiday,island,sky<br>green,forest,trees<br>plants,trees,tree    | lake-a:DET<br>body-water:PREP_OF<br>middle-lake:PREP_OF<br>water-high:AMOD<br>lake-small:AMOD<br>lake-house:PREP_NEAR<br>feet-water:PREP_OF<br>has-house:NSUBJ<br>lake-the:DET<br>green-water:NSUBJ<br>boat-river:PREP_IN<br>bridge-lake:PREP_OVER<br>root-club:ROOT<br>salmon-the:DET<br>bridge-lake:DOBJ |
| 236                    |   | warehouse>window,door<br>abandoned,ruin,factory<br>snow,tree,trees<br>room>window,abandoned<br>house>window,door | part-house:PREP_OF<br>shot-house:PREP_OF<br>had-house:NSUBJ<br>house-old:AMOD<br>garage-a:DET<br>abandoned-house:DOBJ<br>windows-wall:PREP_IN<br>garage-car:NN<br>house-small:AMOD<br>suite-the:DET<br>houses-little:AMOD<br>barn-the:DET<br>building-empty:AMOD<br>floor-house:PREP_OF<br>way-door:NN     |
| 237                    |  | subway,people,graffiti<br>war,world,army<br>telephones,night,red<br>oilfield,art,museum<br>weapons,art,sign      | shirt-an:DET<br>class-the:DET<br>coat-the:DET<br>standing-around:PRT<br>machine-the:DET<br>bar-little:AMOD<br>root-clothes:ROOT<br>booth-telephone:NN<br>shops-the:DET<br>booth-a:DET<br>lab-computer:NN<br>market-japan:PREP_IN<br>door-dag:DEP<br>subway-the:DET<br>root-seats:ROOT                      |
| Continued on next page |                                                                                     |                                                                                                                  |                                                                                                                                                                                                                                                                                                            |



Table1 – continued from previous page

| Index | Image                                                                               | NUS-WIDE Concepts                                                                                                | SBU Concepts                                                                                                                                                                                                                                                                                                |
|-------|-------------------------------------------------------------------------------------|------------------------------------------------------------------------------------------------------------------|-------------------------------------------------------------------------------------------------------------------------------------------------------------------------------------------------------------------------------------------------------------------------------------------------------------|
| 238   |    | arctic,norway,sky<br>twilight,ocean,europe<br>boats,pier,fun<br>lakes,bravo,mountains<br>dawn,reflection,blue    | line-red:AMOD<br>bridge-red:AMOD<br>bridge-railway:NN<br>train-freight:NN<br>roof-green:AMOD<br>red-orange:CONJ_AND<br>car-railroad:NN<br>water-still:AMOD<br>bridge-water:DOBJ<br>rear-the:DET<br>platform-the:DET<br>point-vantage:NN<br>reflected-puddle:PREP_IN<br>bridge-new:AMOD<br>root-resort:ROOT  |
| 239   |   | restaurant,street,people<br>ontario,mall,city<br>cafe,bar,street<br>hotel,room,street<br>day,photo,fun           | bar-little:AMOD<br>area-floor:NN<br>tables-chairs:CONJ_AND<br>living-room:DOBJ<br>lounge-the:DET<br>root-room:ROOT<br>root-bar:ROOT<br>root-tables:ROOT<br>house-beach:NN<br>floor-house:PREP_OF<br>door-looking:VMOD<br>house-bedroom:AMOD<br>kitchen-house:NN<br>room-kitchen:CONJ_AND<br>kitchen-the:DET |
| 240   |  | plants,trees,tree<br>steps,green,red<br>earth,island,river<br>tomb,memorial,cemetery<br>memorial,monument,statue | garden-water:NN<br>root-pond:ROOT<br>root-garden:ROOT<br>statue-a:DET<br>plants-tomato:NN<br>surrounded-trees:AGENT<br>terrace-the:DET<br>wall-retaining:AMOD<br>roof-green:AMOD<br>bridge-stream:PREP_OVER<br>signs-the:DET<br>tree-bottle:NN<br>stream-the:DET<br>rock-wall:DOBJ<br>road-brick:NN         |

Continued on next page

**Table1 – continued from previous page**

| Index | Image                                                                               | NUS-WIDE Concepts                                                                                                                        | SBU Concepts                                                                                                                                                                                                                                                                                               |
|-------|-------------------------------------------------------------------------------------|------------------------------------------------------------------------------------------------------------------------------------------|------------------------------------------------------------------------------------------------------------------------------------------------------------------------------------------------------------------------------------------------------------------------------------------------------------|
| 241   |    | shops,fun,florida<br>berlin,bears,minnesota<br>muslim,market,israel<br>shop,market,food<br>brown,wood,girl                               | tables-the:DET<br>kitchen-a:DET<br>fish-fresh:AMOD<br>market-fish:NN<br>market-air:NN<br>kitchen-house:NN<br>market-the:DET<br>fish-market:DEP<br>market-market:APPOS<br>market-food:NN<br>market-central:AMOD<br>root-dinner:ROOT<br>market-small:AMOD<br>fish-chips:CONJ_AND<br>shops-the:DET            |
| 242   |   | wood,door,old<br>restaurant,street,people<br>historical,war,germany<br>decoration,home,room<br>school,architecture,building              | window-bay:NN<br>see-door:DOBJ<br>house-main:AMOD<br>window-picture:NN<br>boxes-window:NN<br>area-floor:NN<br>root-beds:ROOT<br>window-big:AMOD<br>bed-breakfast:CONJ_AND<br>floor-main:AMOD<br>root-guest:ROOT<br>house-new:AMOD<br>kitchen-new:AMOD<br>building-classroom:NN<br>had-house:NSUBJ          |
| 243   |  | restaurant,street,people<br>interior,furniture,house<br>chairs,interior,office<br>furniture,architecture,interior<br>abandoned,film,wall | root-lounge:ROOT<br>tables-the:DET<br>window-bay:NN<br>table-window:PREP_BY<br>kitchen-a:DET<br>room-sitting:AMOD<br>view-window:NN<br>system-water:NN<br>tables-chairs:CONJ_AND<br>table-breakfast:NN<br>house-house:DEP<br>view-kitchen:PREP_OF<br>area-lounge:NN<br>root-tables:ROOT<br>room-great:AMOD |

Continued on next page

**Table1 – continued from previous page**

| Index | Image                                                                               | NUS-WIDE Concepts                                                                                                              | SBU Concepts                                                                                                                                                                                                                                                                                          |
|-------|-------------------------------------------------------------------------------------|--------------------------------------------------------------------------------------------------------------------------------|-------------------------------------------------------------------------------------------------------------------------------------------------------------------------------------------------------------------------------------------------------------------------------------------------------|
| 244   |    | chairs,interior,office<br>carpet,room,chair<br>restaurant,street,people<br>work,office,apple<br>cafe,bar,street                | tables-chairs:CONJ_AND<br>fireplace-the:DET<br>room-family:NN<br>root-tables:ROOT<br>area-bar:NN<br>living-room:DOBJ<br>root-upstairs:ROOT<br>standing-in:PRT<br>looking-room:PREP_INT<br>tables-the:DET<br>root-bar:ROOT<br>root-home:ROOT<br>floor-new:AMOD<br>root-chairs:ROOT<br>basement-the:DET |
| 245   |   | golf,spain,flag<br>truck,sky,clouds<br>jeep,sky,blue<br>cemetery,church,tree<br>war,ship,history                               | field-cow:NN<br>house-field:NN<br>root-truck:ROOT<br>looking-road:DOBJ<br>trailer-a:DET<br>field-big:AMOD<br>field-soccer:NN<br>greens-the:DET<br>sheep-the:DET<br>house-background:PREP_IN<br>space-green:AMOD<br>scene-typical:AMOD<br>field-ball:NN<br>center-picture:PREP_OF<br>trucks-the:DET    |
| 246   |  | golf,spain,flag<br>war,soldiers,protest<br>uniform,world,historic<br>pennsylvania,president,beards<br>roadblock,protest,london | community-the:DET<br>field-cow:NN<br>plant-tree:DOBJ<br>root-group:ROOT<br>dude-the:DET<br>root-ladies:ROOT<br>grass-lush:AMOD<br>trees-olive:AMOD<br>nursery-tree:NN<br>shirt-the:DET<br>root-crowd:ROOT<br>ride-bus:NN<br>class-the:DET<br>girl-pink:PREP_IN<br>trees-plant:NN                      |

Continued on next page

**Table1 – continued from previous page**

| Index | Image                                                                               | NUS-WIDE Concepts                                                                                                                      | SBU Concepts                                                                                                                                                                                                                                                                                                                 |
|-------|-------------------------------------------------------------------------------------|----------------------------------------------------------------------------------------------------------------------------------------|------------------------------------------------------------------------------------------------------------------------------------------------------------------------------------------------------------------------------------------------------------------------------------------------------------------------------|
| 247   |    | railing,night,sunset<br>pool,apartments,architecture<br>lawn,house,architecture<br>vacation,europe,blue<br>stadium,architecture,canada | field-ball:NN<br>view-field:PREP_OF<br>plant-treatment:NN<br>view-hill:PREP_FROM<br>bridge-new:AMOD<br>window-master:NN<br>crosses-bridge:NSUBJ<br>plant-water:NN<br>bridge-river:PREP_ACROSS<br>road-bridge:DEP<br>bridge-bridge:NSUBJ<br>field-soccer:NN<br>river-ohio:NN<br>crosses-river:DOBJ<br>bridge-bridge:CONJ_AND  |
| 248   |   | golf,spain,flag<br>grass,cow,field<br>countryside,clouds,green<br>lawn,park,girl<br>caribou,arctic,water                               | standing-tree:PREP_UNDER<br>grass-trees:CONJ_AND<br>field-cow:NN<br>field-front:PREP_IN<br>shade-tree:PREP_OF<br>green-grass:NSUBJ<br>field-grass:NN<br>house-background:PREP_IN<br>plant-tree:DOBJ<br>community-the:DET<br>tree-middle:PREP_IN<br>lake-house:PREP_BEHIND<br>cow-the:DET<br>grass-lush:AMOD<br>field-rice:NN |
| 249   |  | interior,light,museum<br>public,interesting,architecture<br>steps,shadow,shadows<br>balcony,apartments,shadow<br>roma,building,light   | stairs-the:DET<br>root-stairs:ROOT<br>root-staircase:ROOT<br>floor-upper:AMOD<br>corridor-a:DET<br>station-street:NN<br>root-corridor:ROOT<br>floor-third:AMOD<br>room-bed:NN<br>kitchen-looking:VMOD<br>staircase-the:DET<br>floor-fourth:AMOD<br>floors-the:DET<br>standing-looking:VMOD<br>entrance-main:AMOD             |

Continued on next page



**Table1 – continued from previous page**

| Index | Image                                                                               | NUS-WIDE Concepts                                                                                                                      | SBU Concepts                                                                                                                                                                                                                                                                                                                 |
|-------|-------------------------------------------------------------------------------------|----------------------------------------------------------------------------------------------------------------------------------------|------------------------------------------------------------------------------------------------------------------------------------------------------------------------------------------------------------------------------------------------------------------------------------------------------------------------------|
| 250   |    | morning,people,coffee<br>train,people,white<br>flying,california,pilot<br>field,cow,park<br>trip,summer,people                         | display-window:NN<br>root-books:ROOT<br>display-the:DET<br>collection-the:DET<br>root-reads:ROOT<br>seats-box:NN<br>bar-a:DET<br>station-main:AMOD<br>place-pizza:NN<br>shelves-the:DET<br>window-street:PREP_IN<br>books-the:DET<br>root-bar:ROOT<br>case-the:DET<br>best-seats:DEP                                         |
| 251   |   | sunset,landscape,sea<br>cloud,storm,sun<br>sky,sunset,sun<br>dusk,clouds,sea<br>storms,nature,ocean                                    | sky-colorful:AMOD<br>sky-sunset:AMOD<br>clouds-water:PREP_OVER<br>root-sunrise:ROOT<br>sunset-the:DET<br>sunset-golden:AMOD<br>sunrise-the:DET<br>looked-clouds:NSUBJ<br>setting-sun:NSUBJ<br>sets-sun:NSUBJ<br>setting-sun:NN<br>fire-sky:PREP_IN<br>sunset-a:DET<br>clouds-black:AMOD<br>clouds-ocean:PREP_OVER            |
| 252   |  | interior,furniture,house<br>chairs,interior,office<br>design,interior,furniture<br>modern,interior,furniture<br>furniture,chairs,retro | table-chairs:CONJ_AND<br>tables-chairs:CONJ_AND<br>table-house:PREP_IN<br>dining-room:DOBJ<br>room-family:NN<br>root-room:ROOT<br>root-tables:ROOT<br>room-dining:NN<br>living-room:DOBJ<br>area-bar:NN<br>chairs-the:DET<br>room-kitchen:CONJ_AND<br>table-window:PREP_BY<br>looking-room:PREP_INTO<br>root-downstairs:ROOT |

Continued on next page

**Table1 – continued from previous page**

| Index | Image                                                                               | NUS-WIDE Concepts                                                                                                                     | SBU Concepts                                                                                                                                                                                                                                                                                                             |
|-------|-------------------------------------------------------------------------------------|---------------------------------------------------------------------------------------------------------------------------------------|--------------------------------------------------------------------------------------------------------------------------------------------------------------------------------------------------------------------------------------------------------------------------------------------------------------------------|
| 253   |    | jail,woman,police<br>kitchen,woman,self<br>telephones,office,room<br>mirror>window,room<br>waiting,bench,chair                        | bathroom-new:AMOD<br>frame-the:DET<br>standing-bedroom:PREP_IN<br>kitchen-house:PREP_OF<br>girl-walking:DEP<br>doors-the:DET<br>standing-door:PREP_IN<br>hole-wall:PREP_IN<br>kitchen-looking:VMOD<br>door-glass:NN<br>root-suite:ROOT<br>kitchen-new:AMOD<br>wall-kitchen:NN<br>standing-door:PREP_BY<br>door-back:AMOD |
| 254   |   | bathroom,water,blue<br>food,cake,cheese<br>kitty,pink,rice<br>wedding,cake,flowers<br>fish,food,aquarium                              | cake-white:AMOD<br>cake-birthday:NN<br>fondant-white:AMOD<br>water-sink:PREP_IN<br>cake-fruit:NN<br>covered-fondant:PREP_IN<br>tub-bath:NN<br>root-plate:ROOT<br>box-plastic:AMOD<br>cake-box:PREP_IN<br>happens-what:NSUBJ<br>tub-the:DET<br>sink-bathroom:NN<br>glass-blue:AMOD<br>cake-chocolate:AMOD                 |
| 255   |  | seattle,library,architecture<br>december,film,abandoned<br>train,tracks,light<br>school,architecture,building<br>tunnel,urban,germany | floor-wood:NN<br>root-staircase:ROOT<br>water-no:NEG<br>tracks-train:NN<br>shape-good:AMOD<br>move-to:AUX<br>panel-the:DET<br>part-house:PREP_OF<br>water-red:AMOD<br>floor-new:AMOD<br>floor-bedroom:NN<br>platform-the:DET<br>car-railroad:NN<br>cars-two:NUM<br>depot-the:DET                                         |

Continued on next page

Table1 – continued from previous page

| Index | Image                                                                               | NUS-WIDE Concepts                                                                                                             | SBU Concepts                                                                                                                                                                                                                                                                                                          |
|-------|-------------------------------------------------------------------------------------|-------------------------------------------------------------------------------------------------------------------------------|-----------------------------------------------------------------------------------------------------------------------------------------------------------------------------------------------------------------------------------------------------------------------------------------------------------------------|
| 256   |    | ice,blue,glacier<br>arctic,ocean,blue<br>cold,water,frozen<br>hiking,blue,lake<br>glacier,sky,nature                          | root-mountain:ROOT<br>ice-the:DET<br>river-frozen:AMOD<br>mountain-highest:AMOD<br>rock-white:AMOD<br>bridge-rock:NN<br>window-truck:PREP_OF<br>mountains-white:AMOD<br>side-mountain:NN<br>root-formations:ROOT<br>park-car:DOBJ<br>view-rock:PREP_OF<br>root-rocks:ROOT<br>covered-snow:PREP_IN<br>tops-mountain:NN |
| 257   |   | islam,asia,people<br>mosque,sunset,night<br>mosque,travel,sky<br>islam,buildings,architecture<br>pakistan,architecture,mosque | dome-the:DET<br>house-opera:NN<br>stone-white:AMOD<br>capitol-state:NN<br>mosque-the:DET<br>root-dome:ROOT<br>parliament-the:DET<br>towers-water:NN<br>window-bus:NN<br>root-temple:ROOT<br>center-a:DET<br>ship-bottle:PREP_IN<br>building-capitol:NN<br>plant-power:NN<br>trip-a:DET                                |
| 258   |  | shop,market,food<br>morning,people,coffee<br>fall,park,water<br>market,street,man<br>trip,summer,people                       | books-the:DET<br>book-the:DET<br>book-new:AMOD<br>read-book:DOBJ<br>tables-the:DET<br>table-room:NN<br>root-breakfast:ROOT<br>girls-kitchen:PREP_IN<br>eat-to:AUX<br>house-gingerbread:AMOD<br>table-window:PREP_BY<br>market-place:NN<br>food-the:DET<br>sitting-office:PREP_IN<br>house-open:AMOD                   |

Continued on next page

**Table1 – continued from previous page**

| Index                  | Image                                                                               | NUS-WIDE Concepts                                                                                                                           | SBU Concepts                                                                                                                                                                                                                                                                                   |
|------------------------|-------------------------------------------------------------------------------------|---------------------------------------------------------------------------------------------------------------------------------------------|------------------------------------------------------------------------------------------------------------------------------------------------------------------------------------------------------------------------------------------------------------------------------------------------|
| 259                    |    | coast,nature,rocks<br>alaska,mountains,glacier<br>snow,mountain,clouds<br>australia,coast,ocean<br>island,landscape,sky                     | tour-boat:NN<br>view-boat:PREP_FROM<br>boat-white:AMOD<br>coast-island:PREP_OF<br>dam-the:DET<br>waters-blue:AMOD<br>blue-water:NSUBJ<br>boat-tour:NN<br>ships-cruise:NN<br>coast-west:AMOD<br>color-water:PREP_OF<br>waters-the:DET<br>river-colorado:NN<br>tour-a:DET<br>highway-coast:NN    |
| 260                    |   | pool,apartments,architecture<br>swimming,sky,trees<br>fountain,architecture,europe<br>monument,statue,memorial<br>statue,italy,architecture | pool-the:DET<br>tub-hot:AMOD<br>house-cool:AMOD<br>house-house:DEP<br>feature-water:NN<br>fountain-a:DET<br>fountain-the:DET<br>root-pool:ROOT<br>root-fountain:ROOT<br>built-house:DOBJ<br>has-house:NSUBJ<br>house-beach:PREP_ON<br>villa-the:DET<br>wall-retaining:AMOD<br>walk-as:MARK     |
| 261                    |  | needles,sky,water<br>army,mountains,abandoned<br>trees,mountains,clouds<br>spring,trees,landscape<br>war,ship,history                       | trees-two:NUM<br>middle-field:PREP_OF<br>tree-center:PREP_IN<br>trees-olive:AMOD<br>trees-pine:AMOD<br>tree-garden:PREP_IN<br>root-trees:ROOT<br>sits-tree:NSUBJ<br>field-a:DET<br>green-so:ADVMOD<br>trees-big:AMOD<br>trees-three:NUM<br>field-cow:NN<br>flower-full:AMOD<br>tree-young:AMOD |
| Continued on next page |                                                                                     |                                                                                                                                             |                                                                                                                                                                                                                                                                                                |



**Table1 – continued from previous page**

| Index                  | Image                                                                               | NUS-WIDE Concepts                                                                                                     | SBU Concepts                                                                                                                                                                                                                                                                                                        |
|------------------------|-------------------------------------------------------------------------------------|-----------------------------------------------------------------------------------------------------------------------|---------------------------------------------------------------------------------------------------------------------------------------------------------------------------------------------------------------------------------------------------------------------------------------------------------------------|
| 262                    |    | aerial,blue,sea<br>airplane,clouds,sky<br>plane,clouds,military<br>maui,pacific,underwater<br>clouds,mountains,beach  | airplane-an:DET<br>sky-house:PREP_ABOVE<br>floor-ocean:NN<br>plane-small:AMOD<br>airplane-the:DET<br>in-water:POBJ<br>window-plane:PREP_OF<br>clouds-sky:PREP_AGAINST<br>cloud-white:AMOD<br>clouds-puffy:AMOD<br>water-sky:PREP_IN<br>feet-:NUM<br>clouds-sky:PREP_IN<br>taken-car:PREP_IN<br>clouds-water:PREP_IN |
| 263                    |   | countryside,farm,field<br>surreal,nature,dream<br>pond,bird,animal<br>valley,water,river<br>aerial,city,germany       | root-pond:ROOT<br>garden-water:NN<br>root-stream:ROOT<br>turtle-the:DET<br>grass-lush:AMOD<br>hike-a:DET<br>river-mountain:NN<br>highlands-the:DET<br>space-green:AMOD<br>stream-water:NN<br>mountains-white:AMOD<br>trail-mountain:NN<br>hike-the:DET<br>hill-small:AMOD<br>grew-house:PREP_IN                     |
| 264                    |  | square,portrait,china<br>bazaar,city,lights<br>restaurant,street,people<br>windows,people,clouds<br>mall,shop,ontario | display-a:DET<br>root-bar:ROOT<br>display-window:NN<br>town-china:NN<br>market-bird:NN<br>market-fruit:NN<br>market-local:AMOD<br>market-night:NN<br>store-the:DET<br>bar-the:DET<br>root-market:ROOT<br>root-display:ROOT<br>market-central:AMOD<br>casino-the:DET<br>root-shrine:ROOT                             |
| Continued on next page |                                                                                     |                                                                                                                       |                                                                                                                                                                                                                                                                                                                     |

**Table1 – continued from previous page**

| Index                  | Image                                                                               | NUS-WIDE Concepts                                                                                                                      | SBU Concepts                                                                                                                                                                                                                                                                                                     |
|------------------------|-------------------------------------------------------------------------------------|----------------------------------------------------------------------------------------------------------------------------------------|------------------------------------------------------------------------------------------------------------------------------------------------------------------------------------------------------------------------------------------------------------------------------------------------------------------|
| 265                    |    | bazaar,city,lights<br>shopping,bazaar,japan<br>restaurant,street,people<br>cafe,bar,street<br>statue,italy,architecture                | root-bar:ROOT<br>root-market:ROOT<br>lobby-the:DET<br>display-window:NN<br>stall-market:NN<br>market-largest:AMOD<br>market-house:PREP_NEAR<br>display-the:DET<br>market-night:NN<br>case-glass:NN<br>stall-market:PREP_IN<br>root-dinner:ROOT<br>market-local:AMOD<br>market-fruit:NN<br>market-air:NN          |
| 266                    |   | tower,skyscraper,office<br>men,light,digital<br>elephant,london,dog<br>protest,france,protesters<br>history,museum,historical          | heart-the:DET<br>church-a:DET<br>ground-zero:NUM<br>root-shrine:ROOT<br>root-man:ROOT<br>student-a:DET<br>mask-a:DET<br>root-pants:ROOT<br>street-the:DET<br>scene-street:NN<br>standing-wall:PREP_AGAINST<br>market-christmas:NN<br>elephant-the:DET<br>coach-a:DET<br>jacket-black:AMOD                        |
| 267                    |  | runway,flight,aviation<br>england,landscape,clouds<br>nederland,landscape,nature<br>road,clouds,landscape<br>waterways,marsh,landscape | field-soccer:NN<br>taken-shot:NSUBJPASS<br>field-ball:NN<br>window-train:NN<br>root-roads:ROOT<br>view-car:PREP_FROM<br>root-flood:ROOT<br>field-front:PREP_IN<br>car-driving:VMOD<br>path-bike:NN<br>root-track:ROOT<br>over-bridge:POBJ<br>road-house:PREP_BY<br>standing-middle:PREP_IN<br>view-field:PREP_OF |
| Continued on next page |                                                                                     |                                                                                                                                        |                                                                                                                                                                                                                                                                                                                  |

**Table1 – continued from previous page**

| Index | Image                                                                               | NUS-WIDE Concepts                                                                                                                    | SBU Concepts                                                                                                                                                                                                                                                                                                                                           |
|-------|-------------------------------------------------------------------------------------|--------------------------------------------------------------------------------------------------------------------------------------|--------------------------------------------------------------------------------------------------------------------------------------------------------------------------------------------------------------------------------------------------------------------------------------------------------------------------------------------------------|
| 268   |    | pakistan,snow,blue<br>landscapes,scenery,countryside<br>moose,mist,caribou<br>creek,green,forest<br>bank,trees,tree                  | pasture-horse:NN<br>cows-field:PREP_IN<br>trees-olive:AMOD<br>root-pasture:ROOT<br>tree-willow:NN<br>trees-green:AMOD<br>tree-single:AMOD<br>deer-the:DET<br>root-elk:ROOT<br>countryside-the:DET<br>house-distance:PREP_IN<br>root-horses:ROOT<br>pasture-the:DET<br>trees-fruit:NN<br>root-deer:ROOT                                                 |
| 269   |   | interior,furniture,house<br>home,interior,design<br>design,interior,furniture<br>room,design,home<br>guest,room,cat                  | window-bay:NN<br>bedroom-master:NN<br>room-house:PREP_IN<br>root-bedroom:ROOT<br>one-rooms:PREP_OF<br>root-master:ROOT<br>looks-window:NSUBJ<br>bedroom-guest:NN<br>room-guest:NN<br>bedroom-house:PREP_IN<br>house-main:AMOD<br>root-downstairs:ROOT<br>window-big:AMOD<br>bed-bedroom:PREP_IN<br>living-room:DOBJ                                    |
| 270   |  | skyscraper,manhattan,clouds<br>downtown,building,blue<br>skyline,building,buildings<br>buildings,building,travel<br>london,sky,river | building-black:AMOD<br>towers-the:DET<br>building-tall:AMOD<br>building-tallest:AMOD<br>view-building:PREP_FROM<br>tower-building:DEP<br>building-building:NSUBJ<br>building-new:AMOD<br>building-distance:PREP_IN<br>building-tower:NSUBJ<br>towers-office:NN<br>tower-office:NN<br>building-highest:AMOD<br>tower-city:NN<br>building-middle:PREP_IN |

Continued on next page

**Table1 – continued from previous page**

| Index | Image                                                                               | NUS-WIDE Concepts                                                                                                                        | SBU Concepts                                                                                                                                                                                                                                                                                                          |
|-------|-------------------------------------------------------------------------------------|------------------------------------------------------------------------------------------------------------------------------------------|-----------------------------------------------------------------------------------------------------------------------------------------------------------------------------------------------------------------------------------------------------------------------------------------------------------------------|
| 271   |    | furniture, chairs, retro<br>floor, window, interior<br>chairs, interior, office<br>modern, interior, furniture<br>home, interior, design | table-chairs: CONJ_AND<br>desk-a: DET<br>table-kitchen: NN<br>root-desk: ROOT<br>table-room: NN<br>chairs-the: DET<br>tables-chairs: CONJ_AND<br>classroom-the: DET<br>floor-new: AMOD<br>desk-computer: NN<br>room-looking: VMOD<br>tables-the: DET<br>area-office: NN<br>root-tables: ROOT<br>desk-office: PREP_IN  |
| 272   |   | shops, urban, japan<br>barge, england, canal<br>smoke, california, demonstration<br>fun, sky, vacation<br>windows, people, clouds        | building-red: AMOD<br>tour-bus: NN<br>houses-colorful: AMOD<br>take-can: AUX<br>train-sky: NN<br>district-light: NN<br>sign-big: AMOD<br>town-little: AMOD<br>market-place: NN<br>station-bus: NN<br>market-fruit: NN<br>station-main: AMOD<br>waterfront-the: DET<br>mall-a: DET<br>sign-white: AMOD                 |
| 273   |  | cafe, bar, street<br>university, girl, people<br>restaurant, street, people<br>work, office, apple<br>morning, people, coffee            | lounge-the: DET<br>car-dining: NN<br>bar-little: AMOD<br>train-sky: NN<br>tables-chairs: CONJ_AND<br>root-suite: ROOT<br>area-bar: NN<br>room-family: NN<br>room-kitchen: CONJ_AND<br>table-window: PREP_BY<br>class-the: DET<br>living-room: DOBJ<br>shopping-window: NN<br>root-lounge: ROOT<br>house-bedroom: AMOD |

Continued on next page



**Table1 – continued from previous page**

| Index                  | Image                                                                               | NUS-WIDE Concepts                                                                                            | SBU Concepts                                                                                                                                                                                                                                                                            |
|------------------------|-------------------------------------------------------------------------------------|--------------------------------------------------------------------------------------------------------------|-----------------------------------------------------------------------------------------------------------------------------------------------------------------------------------------------------------------------------------------------------------------------------------------|
| 274                    |    | chair,room,office<br>display,apple,mac<br>room,design,home<br>office,apple,mac<br>design,interior,furniture  | desk-the:DET<br>room-the:DET<br>desk-computer:NN<br>desk-room:PREP_IN<br>area-bar:NN<br>shelf-book:NN<br>chair-office:PREP_IN<br>screen-big:AMOD<br>room-living:AMOD<br>tv-screen:NN<br>laptop-the:DET<br>office-home:NN<br>root-desk:ROOT<br>bed-room:PREP_IN<br>desk-a:DET            |
| 275                    |   | work,office,apple<br>bathroom,abandoned,interior<br>mac,black,music<br>display,apple,mac<br>field,cow,park   | kitchen-old:AMOD<br>door-cat:NN<br>root-downstairs:ROOT<br>cabinet-the:DET<br>mini-a:DET<br>desk-office:NN<br>root-bathroom:ROOT<br>root-desk:ROOT<br>desk-room:PREP_IN<br>desk-the:DET<br>root-machine:ROOT<br>basement-the:DET<br>area-office:NN<br>upstairs-the:DET<br>desk-new:AMOD |
| 276                    |  | telephones,office,room<br>refugees,girl,boy<br>oilfield,art,museum<br>abandoned,film,wall<br>boys,people,men | root-hold:ROOT<br>building-house:DOBJ<br>bags-sand:NN<br>wall-back:AMOD<br>root-week:ROOT<br>floor-new:AMOD<br>slide-the:DET<br>corner-bottom:AMOD<br>village-fishing:NN<br>locals-the:DET<br>root-children:ROOT<br>lab-the:DET<br>system-water:NN<br>fort-the:DET<br>castle-sand:NN    |
| Continued on next page |                                                                                     |                                                                                                              |                                                                                                                                                                                                                                                                                         |

Table1 – continued from previous page

| Index                  | Image                                                                               | NUS-WIDE Concepts                                                                                                     | SBU Concepts                                                                                                                                                                                                                                                                                                         |
|------------------------|-------------------------------------------------------------------------------------|-----------------------------------------------------------------------------------------------------------------------|----------------------------------------------------------------------------------------------------------------------------------------------------------------------------------------------------------------------------------------------------------------------------------------------------------------------|
| 277                    |    | classroom,california,apple<br>shopping,bazaar,japan<br>guns,pacific,europe<br>airforce,vietnam,navy<br>war,world,army | kitchen-house:PREP_IN<br>market-seafood:NN<br>floor-ground:NN<br>fish-market:CONJ_AND<br>kitchen-a:DET<br>market-biggest:AMOD<br>truck-front:PREP_IN<br>tables-the:DET<br>wall-back:AMOD<br>fish-wholesale:AMOD<br>system-water:NN<br>basement-the:DET<br>tables-chairs:CONJ_AND<br>market-fish:NN<br>floor-top:AMOD |
| 278                    |   | ceiling,iran,art<br>sepia,light,monochrome<br>textures,abstract,green<br>mosque,iran,prayer<br>science,animals,macro  | patterns-the:DET<br>in-wall:POBJ<br>floor-wooden:AMOD<br>bricks-the:DET<br>root-ripples:ROOT<br>floor-house:PREP_IN<br>ceiling-the:DET<br>floor-building:PREP_IN<br>light-street:NN<br>wall-brick:NN<br>sun-shining:VMOD<br>sun-reflecting:VMOD<br>puddle-water:PREP_OF<br>house-wall:DEP<br>root-texture:ROOT       |
| 279                    |  | hangar,aviation,aircraft<br>police,car,cars<br>china,city,red<br>washington,seattle,art<br>fishing,boats,clouds       | putting-water:PREP_IN<br>car-blue:AMOD<br>car-white:AMOD<br>root-cars:ROOT<br>car-little:AMOD<br>root-stuck:ROOT<br>park-car:DOBJ<br>taken-pictures:NSUBJPASS<br>root-safe:ROOT<br>machine-flying:AMOD<br>car-green:AMOD<br>stuck-sand:PREP_IN<br>pictures-the:DET<br>accident-car:NN<br>while-car:NN                |
| Continued on next page |                                                                                     |                                                                                                                       |                                                                                                                                                                                                                                                                                                                      |

**Table1 – continued from previous page**

| Index                  | Image                                                                               | NUS-WIDE Concepts                                                                                                                               | SBU Concepts                                                                                                                                                                                                                                                                                                            |
|------------------------|-------------------------------------------------------------------------------------|-------------------------------------------------------------------------------------------------------------------------------------------------|-------------------------------------------------------------------------------------------------------------------------------------------------------------------------------------------------------------------------------------------------------------------------------------------------------------------------|
| 280                    |    | suburban,arizona,landscape<br>india,landscape,sunset<br>fun,sky,vacation<br>america,building,flag<br>polaroid,abandoned,california              | house-lived:RCMOD<br>roof-tin:NN<br>looks-house:NSUBJ<br>live-in:PRT<br>beach-house:DEP<br>house-typical:AMOD<br>house-front:PREP_IN<br>house-area:PREP_IN<br>neighborhood-old:NN<br>root-club:ROOT<br>root-theater:ROOT<br>buildings-wooden:AMOD<br>taken-phone:PREP_WITH<br>barn-horse:NN<br>covered-bridge:DOBJ      |
| 281                    |   | home,architecture,door<br>houses,building,historic<br>cottage,garden,architecture<br>house,architecture,historic<br>county,architecture,georgia | root-home:ROOT<br>house-big:AMOD<br>house-boat:NN<br>sits-house:NSUBJ<br>house-cute:AMOD<br>view-house:PREP_OF<br>has-house:NSUBJ<br>house-little:AMOD<br>picture-house:PREP_OF<br>root-house:ROOT<br>house-lake:PREP_ON<br>house-forest:PREP_IN<br>house-white:AMOD<br>house-mountains:PREP_IN<br>house-beautiful:AMOD |
| 282                    |  | mist,mountains,clouds<br>fog,mountains,sky<br>surf,coast,nature<br>polaroid,marsh,landscape<br>circle,stone,clouds                              | mist-the:DET<br>root-ship:ROOT<br>islands-the:DET<br>plant-nuclear:AMOD<br>clouds-low:AMOD<br>root-cloud:ROOT<br>morning-a:DET<br>window-bus:NN<br>clouds-mountains:PREP_OVER<br>view-boat:PREP_FROM<br>bridge-gate:NN<br>rainbow-a:DET<br>in-water:POBJ<br>taken-window:PREP_OUT<br>cloud-low:AMOD                     |
| Continued on next page |                                                                                     |                                                                                                                                                 |                                                                                                                                                                                                                                                                                                                         |

**Table1 – continued from previous page**

| Index                  | Image                                                                               | NUS-WIDE Concepts                                                                                                                            | SBU Concepts                                                                                                                                                                                                                                                                                                                                                            |
|------------------------|-------------------------------------------------------------------------------------|----------------------------------------------------------------------------------------------------------------------------------------------|-------------------------------------------------------------------------------------------------------------------------------------------------------------------------------------------------------------------------------------------------------------------------------------------------------------------------------------------------------------------------|
| 283                    |    | subway,blue,street<br>cruise,port,europe<br>waterways,night,light<br>station,railway,underground<br>shopping,architecture,building           | bridge-goes:RCMOD<br>building-ferry:NN<br>goes-bridge:NSUBJ<br>crossing-river:PREP_OVER<br>station-train:NN<br>street-city:PREP_IN<br>station-main:AMOD<br>house-opera:NN<br>roof-glass:NN<br>bridge-bridge:NSUBJ<br>building-interesting:AMOD<br>bridge-sky:NN<br>bridge-london:NN<br>root-modern:ROOT<br>crosses-bridge:NSUBJ                                         |
| 284                    |   | waterways,marsh,landscape<br>suburban,arizona,landscape<br>golf,spain,flag<br>roadblock,water,tree<br>truck,sky,clouds                       | road-house:PREP_OF<br>grass-trees:CONJ_AND<br>road-front:PREP_IN<br>house-distance:PREP_IN<br>looking-house:PREP_AT<br>street-house:PREP_OF<br>street-house:PREP_IN_FRONT_OF<br>view-house:PREP_OF<br>road-house:PREP_IN_FRONT_OF<br>house-lived:RCMOD<br>space-green:AMOD<br>house-cool:AMOD<br>front-house:PREP_OF<br>runs-road:NSUBJ<br>community-the:DET            |
| 285                    |  | modern,skyscraper,buildings<br>maryland,architecture,buildings<br>tourist,temple,portugal<br>hotel,night,lights<br>buildings,building,travel | tower-building:DEP<br>building-large:AMOD<br>building-building:NSUBJ<br>building-brown:AMOD<br>building-tall:AMOD<br>building-front:PREP_IN<br>pictures-streets:PREP_OF<br>building-interesting:AMOD<br>building-beautiful:AMOD<br>marble-white:AMOD<br>building-middle:PREP_IN<br>building-white:AMOD<br>towers-office:NN<br>building-black:AMOD<br>building-cool:AMOD |
| Continued on next page |                                                                                     |                                                                                                                                              |                                                                                                                                                                                                                                                                                                                                                                         |



**Table1 – continued from previous page**

| Index                  | Image                                                                               | NUS-WIDE Concepts                                                                                                                 | SBU Concepts                                                                                                                                                                                                                                                                                                                       |
|------------------------|-------------------------------------------------------------------------------------|-----------------------------------------------------------------------------------------------------------------------------------|------------------------------------------------------------------------------------------------------------------------------------------------------------------------------------------------------------------------------------------------------------------------------------------------------------------------------------|
| 286                    |    | mall,shop,ontario<br>airport,travel,architecture<br>aviation,fighter,california<br>people,city,night<br>metro,station,train       | ceiling-the:DET<br>roof-glass:NN<br>floor-ground:NN<br>store-apple:NN<br>wall-glass:NN<br>bridge-sky:NN<br>house-field:NN<br>floor-top:AMOD<br>root-seats:ROOT<br>machine-the:DET<br>lobby-building:PREP_OF<br>house-glass:NN<br>hall-main:AMOD<br>ball-a:DET<br>stage-the:DET                                                     |
| 287                    |   | bridges,trees,nature<br>houseboat,india,nature<br>victoria,pier,ship<br>australia,coast,ocean<br>raft,sunset,sky                  | ship-cruise:NN<br>house-boat:NN<br>middle-river:PREP_OF<br>crossing-river:DOBJ<br>boat-tour:NN<br>bridge-river:PREP_ON<br>looking-river:DOBJ<br>seen-bridge:PREP_FROM<br>cruise-boat:NN<br>level-water:NN<br>river-the:DET<br>boat-bay:PREP_IN<br>boat-river:NN<br>root-tour:ROOT<br>surrounded-water:AGENT                        |
| 288                    |  | paradise,ocean,sea<br>waterways,marsh,landscape<br>river,waterfall,landscape<br>vacation,island,beach<br>alaska,mountains,glacier | salmon-the:DET<br>lake-small:AMOD<br>root-lake:ROOT<br>river-house:PREP_BY<br>lake-mountains:PREP_IN<br>root-river:ROOT<br>rock-lake:PREP_IN<br>river-mountain:NN<br>taken-road:PREP_FROM<br>river-mountains:PREP_IN<br>river-running:VMOD<br>side-lake:PREP_OF<br>view-lake:PREP_OF<br>color-water:PREP_OF<br>middle-lake:PREP_OF |
| Continued on next page |                                                                                     |                                                                                                                                   |                                                                                                                                                                                                                                                                                                                                    |

**Table1 – continued from previous page**

| Index | Image                                                                               | NUS-WIDE Concepts                                                                                                                      | SBU Concepts                                                                                                                                                                                                                                                                                                              |
|-------|-------------------------------------------------------------------------------------|----------------------------------------------------------------------------------------------------------------------------------------|---------------------------------------------------------------------------------------------------------------------------------------------------------------------------------------------------------------------------------------------------------------------------------------------------------------------------|
| 289   |    | home,interior,design<br>interior,furniture,house<br>floor>window,interior<br>modern,interior,furniture<br>room,design,home             | bed-bedroom:PREP_IN<br>bedroom-house:PREP_IN<br>bedroom-house:PREP_OF<br>bedroom-master:NN<br>bed-room:PREP_IN<br>root-bedroom:ROOT<br>bed-size:NN<br>bed-queen:NN<br>root-downstairs:ROOT<br>living-room:DOBJ<br>bed-house:PREP_IN<br>root-master:ROOT<br>bedroom-the:DET<br>room-bed:NN<br>root-room:ROOT               |
| 290   |   | interior,furniture,house<br>modern,interior,furniture<br>design,interior,furniture<br>room,design,home<br>home,interior,design         | bed-bedroom:PREP_IN<br>room-living:AMOD<br>room-family:NN<br>living-room:DOBJ<br>root-bedroom:ROOT<br>root-downstairs:ROOT<br>corner-the:DET<br>house-bedroom:AMOD<br>bedroom-house:PREP_OF<br>room-living:NN<br>bedroom-house:PREP_IN<br>room-kitchen:CONJ_AND<br>root-guest:ROOT<br>has-bedroom:NSUBJ<br>root-room:ROOT |
| 291   |  | houses,building,historic<br>house>window,door<br>home,architecture,door<br>mirror,architecture,blue<br>public,interesting,architecture | root-house:ROOT<br>house-a:DET<br>houses-many:AMOD<br>house-little:AMOD<br>house-yard:PREP_IN<br>cute-house:DOBJ<br>house-beach:NN<br>root-home:ROOT<br>house-neighborhood:PREP_IN<br>house-beautiful:AMOD<br>houses-two:NUM<br>built-house:NSUBJ<br>root-houses:ROOT<br>houses-old:AMOD<br>town-beach:NN                 |

Continued on next page

Table1 – continued from previous page

| Index | Image                                                                               | NUS-WIDE Concepts                                                                                              | SBU Concepts                                                                                                                                                                                                                                                                                                     |
|-------|-------------------------------------------------------------------------------------|----------------------------------------------------------------------------------------------------------------|------------------------------------------------------------------------------------------------------------------------------------------------------------------------------------------------------------------------------------------------------------------------------------------------------------------|
| 292   |    | oilfield,kuwait,california<br>ancient,tree,city<br>tanks,oil,sunset<br>needles,sky,water<br>plants,trees,tree  | pine-tree:DOBJ<br>tree-road:PREP_IN<br>cool-tree:DOBJ<br>root-tree:ROOT<br>tree-cool:AMOD<br>trees-two:NUM<br>tree-pine:NN<br>trees-many:AMOD<br>tree-dead:AMOD<br>root-trees:ROOT<br>looked-tree:NSUBJ<br>forest-tree:NN<br>had-tree:NSUBJ<br>looking-tree:DOBJ<br>tree-beautiful:AMOD                          |
| 293   |   | beauty,asia,japan<br>night,moon,sky<br>blue,ocean,beach<br>airplane,pilot,fighter<br>museum,history,war        | tank-the:DET<br>boat-glass:NN<br>aquarium-the:DET<br>tank-fish:NN<br>tank-a:DET<br>screen-green:AMOD<br>wall-blue:AMOD<br>root-shoot:ROOT<br>pool-swimming:NN<br>house-mother:POSS<br>display-window:NN<br>wall-glass:NN<br>under-bridge:POBJ<br>sea-red:AMOD<br>scene-the:DET                                   |
| 294   |  | golf,spain,flag<br>golf,trees,club<br>lawn,clouds,landscape<br>lawn,house,architecture<br>grass,landscape,tree | castle-the:DET<br>grounds-the:DET<br>trees-three:NUM<br>fields-green:AMOD<br>field-cow:NN<br>house-building:NSUBJ<br>castle-old:AMOD<br>house-beach:PREP_NEAR<br>abbey-the:DET<br>grass-green:AMOD<br>surrounded-trees:PREP_BY<br>line-trees:PREP_OF<br>trees-oak:NN<br>house-distance:PREP_IN<br>house-manor:NN |

Continued on next page

Table1 – continued from previous page

| Index                  | Image                                                                               | NUS-WIDE Concepts                                                                                                       | SBU Concepts                                                                                                                                                                                                                                                                                                         |
|------------------------|-------------------------------------------------------------------------------------|-------------------------------------------------------------------------------------------------------------------------|----------------------------------------------------------------------------------------------------------------------------------------------------------------------------------------------------------------------------------------------------------------------------------------------------------------------|
| 295                    |    | restaurant,street,people<br>bar,city,cafe<br>chairs,interior,office<br>cafe,bar,street<br>interior,light,museum         | roof-glass:NN<br>root-bar:ROOT<br>tables-chairs:CONJ_AND<br>table-window:PREP_BY<br>area-floor:NN<br>tables-the:DET<br>floor-fourth:AMOD<br>door-dag:DEP<br>window-hotel:PREP_OF<br>window-sink:PREP_OVER<br>building-market:NN<br>building-the:DET<br>root-lounge:ROOT<br>apartment-floor:NN<br>window-picture:NN   |
| 296                    |   | urban,abandoned,night<br>greece,boats,boat<br>islam,asia,people<br>chairs,interior,office<br>boats,pier,fun             | view-of:PREP<br>tables-the:DET<br>floor-third:AMOD<br>floor-building:PREP_IN<br>tables-chairs:CONJ_AND<br>lab-computer:NN<br>view-room:PREP_FROM<br>area-floor:NN<br>ship-cruise:NN<br>building-classroom:NN<br>road-beach:NN<br>room-floor:PREP_ON<br>root-notice:ROOT<br>fence-picket:NN<br>standing-while:NN      |
| 297                    |  | station,subway,metro<br>tokyo,architecture,film<br>railway,tracks,light<br>underground,people,street<br>rail,ties,light | walking-bridge:PREP_OVER<br>platform-the:DET<br>root-station:ROOT<br>road-busy:AMOD<br>passes-train:NSUBJ<br>bridge-pedestrian:AMOD<br>station-central:AMOD<br>station-train:NN<br>bridge-street:NN<br>train-car:NN<br>bridge-walking:AMOD<br>tracks-train:NN<br>root-walkway:ROOT<br>train-line:NN<br>train-the:DET |
| Continued on next page |                                                                                     |                                                                                                                         |                                                                                                                                                                                                                                                                                                                      |



**Table1 – continued from previous page**

| Index | Image                                                                               | NUS-WIDE Concepts                                                                                                                                     | SBU Concepts                                                                                                                                                                                                                                                                                                                    |
|-------|-------------------------------------------------------------------------------------|-------------------------------------------------------------------------------------------------------------------------------------------------------|---------------------------------------------------------------------------------------------------------------------------------------------------------------------------------------------------------------------------------------------------------------------------------------------------------------------------------|
| 298   |    | maryland,architecture,buildings<br>houses,building,historic<br>house,architecture,historic<br>structure,buildings,clouds<br>buildings,building,travel | house-building:DEP<br>house-beautiful:AMOD<br>house-pink:AMOD<br>house-district:PREP_IN<br>houses-two:NUM<br>house-street:PREP_ACROSS<br>cute-house:DOBJ<br>buildings-many:AMOD<br>building-historic:AMOD<br>window-top:AMOD<br>root-house:ROOT<br>house-big:AMOD<br>built-house:NSUBJ<br>row-houses:PREP_OF<br>house-blue:AMOD |
| 299   |   | vintage,pink,handmade<br>home,interior,design<br>design,interior,furniture<br>kitchen,interior,design<br>room,design,home                             | style-door:NN<br>paper-the:DET<br>room-house:PREP_OF<br>area-kitchen:NN<br>bedroom-house:PREP_OF<br>created-style:PREP_WITH<br>wall-one:NUM<br>kitchen-house:PREP_OF<br>room-guest:NN<br>kitchen-house:NN<br>style-the:DET<br>kitchen-house:PREP_IN<br>table-kitchen:PREP_IN<br>shopping-window:NN<br>root-guest:ROOT           |
| 300   |  | greece,boats,boat<br>shops,fun,florida<br>restaurant,street,people<br>navy,airforce,airplane<br>downtown,people,street                                | tables-the:DET<br>tables-chairs:CONJ_AND<br>resort-mountain:NN<br>pool-the:DET<br>root-rest:ROOT<br>root-eat:ROOT<br>floor-house:PREP_OF<br>room-family:NN<br>root-bar:ROOT<br>floor-top:AMOD<br>sliding-doors:DOBJ<br>room-house:PREP_OF<br>root-guest:ROOT<br>root-front:ROOT<br>area-bar:NN                                  |

Continued on next page

**Table1 – continued from previous page**

| Index | Image                                                                               | NUS-WIDE Concepts                                                                                                               | SBU Concepts                                                                                                                                                                                                                                                                                                                      |
|-------|-------------------------------------------------------------------------------------|---------------------------------------------------------------------------------------------------------------------------------|-----------------------------------------------------------------------------------------------------------------------------------------------------------------------------------------------------------------------------------------------------------------------------------------------------------------------------------|
| 301   |    | barge,england,canal<br>house,architecture,historic<br>stream,trees,sky<br>guard,ship,nature<br>suburban,arizona,landscape       | house-mountains:PREP_IN<br>root-house:ROOT<br>house-little:AMOD<br>house-forest:PREP_IN<br>roof-house:PREP_OF<br>surrounded-trees:AGENT<br>house-front:PREP_IN<br>house-red:AMOD<br>house-big:AMOD<br>house-lake:PREP_IN<br>root-home:ROOT<br>house-hill:PREP_IN<br>home-family:NN<br>house-river:PREP_BY<br>house-middle:PREP_IN |
| 302   |   | train,sky,city<br>railroad,bridge,locomotive<br>railway,bridge,steam<br>oilfield,kuwait,california<br>tracks,locomotive,station | mill-paper:NN<br>train-freight:NN<br>crosses-train:NSUBJ<br>root-passes:ROOT<br>one-house:NSUBJ<br>cars-train:NN<br>passes-train:NSUBJ<br>fence-an:DET<br>tracks-train:NSUBJ<br>railroad-the:DET<br>car-box:NN<br>train-an:DET<br>root-span:ROOT<br>window-master:NN<br>plant-old:AMOD                                            |
| 303   |  | mosques,asia,islam<br>decoration,home,room<br>bridge,ship,car<br>room>window,abandoned<br>photographers,portrait,photos         | lounge-the:DET<br>floor-dance:NN<br>root-room:ROOT<br>root-suite:ROOT<br>cabin-the:DET<br>room-family:NN<br>suite-the:DET<br>root-lounge:ROOT<br>room-bed:NN<br>tables-the:DET<br>seats-box:NN<br>paper-wall:NN<br>seats-the:DET<br>room-house:PREP_OF<br>bedroom-house:PREP_IN                                                   |

Continued on next page

Table1 – continued from previous page

| Index | Image                                                                               | NUS-WIDE Concepts                                                                                                                    | SBU Concepts                                                                                                                                                                                                                                                                                                              |
|-------|-------------------------------------------------------------------------------------|--------------------------------------------------------------------------------------------------------------------------------------|---------------------------------------------------------------------------------------------------------------------------------------------------------------------------------------------------------------------------------------------------------------------------------------------------------------------------|
| 304   |    | shrine,architecture,church<br>rail,station,night<br>europe,architecture,church<br>religion,europe,italy<br>tracks,locomotive,station | train-old:AMOD<br>arches-the:DET<br>train-an:DET<br>street-town:PREP_IN<br>town-old:AMOD<br>hall-main:AMOD<br>street-back:AMOD<br>market-old:AMOD<br>root-corridor:ROOT<br>arch-the:DET<br>root-prague:ROOT<br>tower-main:AMOD<br>walls-red:AMOD<br>corridor-a:DET<br>street-narrow:AMOD                                  |
| 305   |   | library,explore,interestingness<br>store,people,street<br>morning,people,coffee<br>business,men,meeting<br>shopping,bazaar,japan     | books-the:DET<br>books-library:PREP_IN<br>section-the:DET<br>store-book:NN<br>shelves-the:DET<br>shop-book:NN<br>walking-street:PREP_ON<br>shops-the:DET<br>market-place:NN<br>carpet-the:DET<br>root-hold:ROOT<br>board-the:DET<br>classroom-the:DET<br>market-book:NN<br>case-the:DET                                   |
| 306   |  | mountains,river,lake<br>protest,france,protesters<br>holiday,architecture,trip<br>shrine,gate,sunset<br>president,photo,art          | root-home:ROOT<br>root-shrine:ROOT<br>house-mountains:PREP_IN<br>house-mountain:NN<br>root-cabin:ROOT<br>house-house:DEP<br>grew-house:PREP_IN<br>house-neighborhood:PREP_IN<br>hike-the:DET<br>root-stay:ROOT<br>house-big:AMOD<br>house-cool:AMOD<br>house-hill:PREP_IN<br>house-beach:PREP_NEAR<br>building-house:DOBJ |

Continued on next page

**Table1 – continued from previous page**

| Index                  | Image                                                                               | NUS-WIDE Concepts                                                                                                                         | SBU Concepts                                                                                                                                                                                                                                                                                                                                |
|------------------------|-------------------------------------------------------------------------------------|-------------------------------------------------------------------------------------------------------------------------------------------|---------------------------------------------------------------------------------------------------------------------------------------------------------------------------------------------------------------------------------------------------------------------------------------------------------------------------------------------|
| 307                    |    | airport,travel,architecture<br>windows,people,clouds<br>glass,green,water<br>metro,station,train<br>room>window,abandoned                 | seen-window:PREP_THROUGH<br>hall-main:AMOD<br>floor-top:AMOD<br>ceiling-the:DET<br>store-apple:NN<br>dome-the:DET<br>root-bar:ROOT<br>seats-the:DET<br>floor-upper:AMOD<br>floor-dance:NN<br>roof-glass:NN<br>area-bar:NN<br>floor-the:DET<br>court-the:DET<br>pool-the:DET                                                                 |
| 308                    |   | building,church,europe<br>tourist,temple,portugal<br>architecture,buildings,night<br>capital,night,sun<br>maryland,architecture,buildings | dome-the:DET<br>building-white:AMOD<br>house-glass:NN<br>building-historic:AMOD<br>building-background:PREP_IN<br>house-opera:NN<br>building-large:AMOD<br>building-beautiful:AMOD<br>looks-building:NSUBJ<br>building-in:PREP<br>dome-glass:NN<br>houses-building:NSUBJ<br>building-yellow:AMOD<br>building-style:NN<br>cool-building:DOBJ |
| 309                    |  | chairs,interior,office<br>groom,flowers,cake<br>design,interior,furniture<br>wedding,cake,flowers<br>office,apple,mac                     | tables-the:DET<br>sign-table:PREP_IN<br>table-house:PREP_IN<br>root-tables:ROOT<br>root-display:ROOT<br>table-kitchen:PREP_IN<br>table-window:PREP_BY<br>room-house:PREP_OF<br>kitchen-house:PREP_OF<br>flowers-fresh:AMOD<br>roses-white:AMOD<br>kitchen-house:NN<br>studio-the:DET<br>table-room:NN<br>display-window:NSUBJ               |
| Continued on next page |                                                                                     |                                                                                                                                           |                                                                                                                                                                                                                                                                                                                                             |



**Table1 – continued from previous page**

| Index                  | Image                                                                               | NUS-WIDE Concepts                                                                                                                   | SBU Concepts                                                                                                                                                                                                                                                                                                                     |
|------------------------|-------------------------------------------------------------------------------------|-------------------------------------------------------------------------------------------------------------------------------------|----------------------------------------------------------------------------------------------------------------------------------------------------------------------------------------------------------------------------------------------------------------------------------------------------------------------------------|
| 310                    |    | cactus,desert,arizona<br>landscapes,scenery,countryside<br>tundra,colorado,mountain<br>poland,field,landscape<br>pakistan,snow,blue | trees-fruit:NN<br>fence-an:DET<br>trees-dead:AMOD<br>trees-olive:AMOD<br>hill-small:AMOD<br>view-trees:PREP_OF<br>tree-young:AMOD<br>pine-tree:DOBJ<br>root-pasture:ROOT<br>hillside-the:DET<br>looked-tree:NSUBJ<br>root-trail:ROOT<br>stand-trees:PREP_OF<br>trees-apple:NN<br>fields-green:AMOD                               |
| 311                    |   | york,street,red<br>engine,art,nature<br>oilfield,art,museum<br>vintage,car,classic<br>formula,classic,sport                         | truck-old:AMOD<br>root-train:ROOT<br>root-seat:ROOT<br>tractor-a:DET<br>building-school:NN<br>details-the:DET<br>root-car:ROOT<br>train-the:DET<br>table-chairs:CONJ_AND<br>sign-an:DET<br>office-the:DET<br>seats-the:DET<br>view-front:AMOD<br>car-little:AMOD<br>shape-good:AMOD                                              |
| 312                    |  | hill,wildlife,countryside<br>mountains,trees,water<br>airforce,vietnam,navy<br>view,mountains,landscape<br>oregon,sky,flight        | mountain-distance:PREP_IN<br>crater-the:DET<br>mountain-highest:AMOD<br>mountains-distance:PREP_IN<br>mountains-green:AMOD<br>mountain-blue:AMOD<br>sign-hollywood:NN<br>view-mountains:PREP_OF<br>mountain-background:PREP_IN<br>distance-the:DET<br>ride-bus:NN<br>feet-:NUM<br>field-cow:NN<br>hillside-the:DET<br>hill-a:DET |
| Continued on next page |                                                                                     |                                                                                                                                     |                                                                                                                                                                                                                                                                                                                                  |

Table1 – continued from previous page

| Index                  | Image                                                                               | NUS-WIDE Concepts                                                                                                                       | SBU Concepts                                                                                                                                                                                                                                                                                                                        |
|------------------------|-------------------------------------------------------------------------------------|-----------------------------------------------------------------------------------------------------------------------------------------|-------------------------------------------------------------------------------------------------------------------------------------------------------------------------------------------------------------------------------------------------------------------------------------------------------------------------------------|
| 313                    |    | building,church,europe<br>temple,heritage,thailand<br>tourism,europe,trip<br>chapel,buildings,design<br>maryland,architecture,buildings | building-church:NN<br>courthouse-county:NN<br>houses-building:NSUBJ<br>church-catholic:AMOD<br>building-house:NN<br>house-court:NN<br>clock-tower:DEP<br>one-buildings:PREP_OF<br>buildings-many:AMOD<br>house-tower:NN<br>building-post:NN<br>building-oldest:AMOD<br>built-century:PREP_IN<br>century-the:DET<br>root-palace:ROOT |
| 314                    |   | trees,leaves,autumn<br>pond,trees,reflections<br>leaves,trees,fall<br>tunnel,trees,green<br>fog,forest,trees                            | tree-willow:NN<br>water-still:ADVMOD<br>system-water:NN<br>canopy-a:DET<br>root-road:ROOT<br>virginia-west:NN<br>road-forest:PREP_IN<br>root-trail:ROOT<br>grown-has:AUX<br>forest-a:DET<br>garden-water:NN<br>road-county:PREP_IN<br>area-mountain:NN<br>lake-mountain:NN<br>root-cabin:ROOT                                       |
| 315                    |  | refugees,girl,boy<br>oilfield,kuwait,california<br>roadblock,water,tree<br>army,mountains,abandoned<br>airforce,vietnam,navy            | building-house:DOBJ<br>root-tractor:ROOT<br>system-water:NN<br>nursery-tree:NN<br>castle-sand:NN<br>stuck-sand:PREP_IN<br>built-house:DOBJ<br>tractor-a:DET<br>trees-plant:NN<br>car-field:PREP_IN<br>chairs-beach:NN<br>camp-the:DET<br>road-beach:NN<br>root-lift:ROOT<br>building-wall:DOBJ                                      |
| Continued on next page |                                                                                     |                                                                                                                                         |                                                                                                                                                                                                                                                                                                                                     |

**Table1 – continued from previous page**

| Index                  | Image                                                                               | NUS-WIDE Concepts                                                                                                 | SBU Concepts                                                                                                                                                                                                                                                                                           |
|------------------------|-------------------------------------------------------------------------------------|-------------------------------------------------------------------------------------------------------------------|--------------------------------------------------------------------------------------------------------------------------------------------------------------------------------------------------------------------------------------------------------------------------------------------------------|
| 316                    |    | telephones,office,room<br>work,office,apple<br>chairs,interior,office<br>mug,dog,pet<br>design,interior,furniture | root-chairs:ROOT<br>chairs-the:DET<br>desk-office:NN<br>bar-a:DET<br>tables-chairs:CONJ_AND<br>kitchen-a:DET<br>room-kitchen:CONJ_AND<br>machine-the:DET<br>table-house:PREP_IN<br>kitchen-new:AMOD<br>chairs-two:NUM<br>front-door:PREP_OF<br>kitchen-old:AMOD<br>root-bar:ROOT<br>sign-table:PREP_IN |
| 317                    |   | airforce,vietnam,navy<br>tanks,oil,sunset<br>vietnam,soldier,adults<br>army,iraq,kuwait<br>bike,sky,water         | top-hill:NN<br>shadow-tree:PREP_OF<br>walls-old:AMOD<br>road-main:AMOD<br>walls-stone:NN<br>ride-bike:NSUBJ<br>tree-shoe:NN<br>hill-steep:AMOD<br>branch-the:DET<br>stand-trees:PREP_OF<br>tree-middle:PREP_IN<br>root-group:ROOT<br>root-rest:ROOT<br>castle-an:DET<br>ride-bus:NN                    |
| 318                    |  | maps,aerial,school<br>walking,nature,outdoors<br>israel,art,color<br>hiking,wildlife,tree<br>party,fun,blue       | chickens-the:DET<br>plant-to:AUX<br>roots-the:DET<br>plants-tomato:NN<br>bushes-the:DET<br>tree-olive:AMOD<br>bird-the:DET<br>moss-green:AMOD<br>snake-a:DET<br>swamp-the:DET<br>ground-the:DET<br>dirt-the:DET<br>deer-the:DET<br>hole-ground:PREP_IN<br>hanging-tree:PREP_FROM                       |
| Continued on next page |                                                                                     |                                                                                                                   |                                                                                                                                                                                                                                                                                                        |

Table1 – continued from previous page

| Index | Image                                                                               | NUS-WIDE Concepts                                                                                                         | SBU Concepts                                                                                                                                                                                                                                                                                                                                  |
|-------|-------------------------------------------------------------------------------------|---------------------------------------------------------------------------------------------------------------------------|-----------------------------------------------------------------------------------------------------------------------------------------------------------------------------------------------------------------------------------------------------------------------------------------------------------------------------------------------|
| 319   |    | restaurant,street,people<br>entrance,red,blue<br>weapons,art,sign<br>wood,door,old<br>painting,night,wall                 | cabinets-the:DET<br>wall-red:AMOD<br>room-bed:NN<br>door-red:AMOD<br>room-family:NN<br>cabinets-kitchen:NN<br>house-red:AMOD<br>wall-orange:AMOD<br>has-house:NSUBJ<br>paint-to:AUX<br>wall-colorful:AMOD<br>bar-the:DET<br>style-the:DET<br>root-kitchen:ROOT<br>upstairs-the:DET                                                            |
| 320   |   | design,interior,furniture<br>office,apple,mac<br>modern,interior,furniture<br>work,office,apple<br>mac,office,photography | kitchen-house:PREP_IN<br>stove-kitchen:PREP_IN<br>root-kitchen:ROOT<br>created-style:PREP_WITH<br>created-kitchen:NSUBJPASS<br>style-door:NN<br>microwave-the:DET<br>desk-computer:NN<br>style-the:DET<br>cherry-finished:VMOD<br>root-desk:ROOT<br>sink-kitchen:PREP_IN<br>created-cherry:PREP_IN<br>kitchen-house:PREP_OF<br>desk-office:NN |
| 321   |  | maldives,coral,ocean<br>islands,fish,underwater<br>coral,blue,scuba<br>diving,marine,blue<br>marine,underwater,diving     | floor-ocean:NN<br>reef-barrier:NN<br>water-blue:AMOD<br>boat-glass:NN<br>fish-sea:PREP_IN<br>fish-blue:AMOD<br>swimming-turtle:NN<br>dive-a:DET<br>reef-great:NN<br>reef-the:DET<br>fish-water:PREP_IN<br>ocean-blue:AMOD<br>water-deep:AMOD<br>sea-red:AMOD<br>canyon-an:DET                                                                 |

Continued on next page



**Table1 – continued from previous page**

| Index                  | Image                                                                               | NUS-WIDE Concepts                                                                                                                       | SBU Concepts                                                                                                                                                                                                                                                                                                                                        |
|------------------------|-------------------------------------------------------------------------------------|-----------------------------------------------------------------------------------------------------------------------------------------|-----------------------------------------------------------------------------------------------------------------------------------------------------------------------------------------------------------------------------------------------------------------------------------------------------------------------------------------------------|
| 322                    |    | underwater,coral,nature<br>maldives,coral,ocean<br>scuba,coral,nature<br>sea,underwater,fish<br>reefs,blue,marine                       | lots-fish:PREP_OF<br>crystal-the:DET<br>clear-crystal:NSUBJ<br>clear-water:NSUBJ<br>water-beautiful:AMOD<br>clear-crystal:ADVMOD<br>clear-water:DOBJ<br>crystal-water:DEP<br>pool-rock:NN<br>water-sea:NN<br>water-lake:NN<br>water-crystal:NN<br>root-sea:ROOT<br>reef-barrier:NN<br>one-beaches:PREP_OF                                           |
| 323                    |   | public,interesting,architecture<br>modern,skyscraper,buildings<br>house>window,door<br>mall,shop,ontario<br>aviation,fighter,california | mall-shopping:NN<br>building-one:NUM<br>buildings-new:AMOD<br>building-glass:NN<br>reflected-window:PREP_IN<br>walls-glass:NN<br>rapids-grand:NN<br>reflected-house:NSUBJ<br>reflection-window:PREP_IN<br>root-reflection:ROOT<br>reflected-glass:PREP_IN<br>reflection-building:PREP_OF<br>wheel-the:DET<br>office-building:VMOD<br>house-glass:NN |
| 324                    |  | jail,woman,police<br>youth,brazil,brasil<br>floor>window,interior<br>suburban,building,dark<br>kitchen,woman,self                       | looking-window:PREP_IN<br>reflected-door:PREP_IN<br>standing-bedroom:PREP_IN<br>wall-brick:NN<br>cage-bird:NN<br>window-door:NN<br>heater-the:DET<br>room-main:AMOD<br>floor-house:PREP_IN<br>door-kitchen:PREP_IN<br>kitchen-new:AMOD<br>bars-the:DET<br>kitchen-looking:VMOD<br>standing-door:PREP_BY<br>door-glass:NN                            |
| Continued on next page |                                                                                     |                                                                                                                                         |                                                                                                                                                                                                                                                                                                                                                     |

**Table1 – continued from previous page**

| Index | Image                                                                               | NUS-WIDE Concepts                                                                                                              | SBU Concepts                                                                                                                                                                                                                                                                                                 |
|-------|-------------------------------------------------------------------------------------|--------------------------------------------------------------------------------------------------------------------------------|--------------------------------------------------------------------------------------------------------------------------------------------------------------------------------------------------------------------------------------------------------------------------------------------------------------|
| 325   |    | industry,power,architecture<br>tower,sunset,night<br>michigan,decay,architecture<br>lighthouse,beach,sea<br>groom,sunset,woman | tower-water:NN<br>water-tower:DEP<br>towers-water:NN<br>shot-tower:PREP_OF<br>root-towers:ROOT<br>root-steel:ROOT<br>root-water:ROOT<br>tower-town:PREP_IN<br>house-sky:PREP_IN<br>backdrop-a:DET<br>tower-city:PREP_IN<br>towers-two:NUM<br>root-west:ROOT<br>water-old:AMOD<br>house-light:AMOD            |
| 326   |   | fish-eye,digital,eos<br>bride,cake,india<br>home,architecture,door<br>arch>window,brick<br>tent,people,summer                  | house-glass:NN<br>lives-house:PREP_IN<br>across-street:POBJ<br>window-side:NN<br>hold-to:AUX<br>window-one:PREP_IN<br>reflection-house:PREP_OF<br>house-summer:NN<br>house-big:AMOD<br>house-beautiful:AMOD<br>house-green:AMOD<br>cottage-a:DET<br>glass-art:NN<br>dresses-white:AMOD<br>house-hill:PREP_IN |
| 327   |  | room>window,abandoned<br>dock,sunset,bay<br>furniture,architecture,interior<br>abandoned,ruin,factory<br>cabin,explore>window  | tables-chairs:CONJ_AND<br>window-big:AMOD<br>view-door:PREP_FROM<br>view-room:PREP_FROM<br>tables-the:DET<br>root-tables:ROOT<br>root-balcony:ROOT<br>root-room:ROOT<br>living-room:DOBJ<br>window-bay:NN<br>door-balcony:AMOD<br>area-bar:NN<br>rail-the:DET<br>looks-window:NSUBJ<br>wall-window:NN        |

Continued on next page

Table1 – continued from previous page

| Index                  | Image                                                                               | NUS-WIDE Concepts                                                                                                                      | SBU Concepts                                                                                                                                                                                                                                                                                                                   |
|------------------------|-------------------------------------------------------------------------------------|----------------------------------------------------------------------------------------------------------------------------------------|--------------------------------------------------------------------------------------------------------------------------------------------------------------------------------------------------------------------------------------------------------------------------------------------------------------------------------|
| 328                    |    | work,office,apple<br>room,design,home<br>home,interior,design<br>design,interior,furniture<br>kitchen,interior,design                  | kitchen-the:DET<br>kitchen-a:DET<br>shelves-the:DET<br>kitchen-house:PREP_IN<br>kitchen-house:PREP_OF<br>stove-kitchen:PREP_IN<br>root-counter:ROOT<br>shelf-book:NN<br>doors-cabinet:NN<br>case-the:DET<br>shelf-kitchen:PREP_IN<br>counter-the:DET<br>cabinet-the:DET<br>root-kitchen:ROOT<br>floor-third:AMOD               |
| 329                    |   | mosque,sunset,night<br>tower,sunset,night<br>cactus,sunset,desert<br>panorama,sea,water<br>arizona,sunset,clouds                       | towers-the:DET<br>monument-washington:NN<br>plant-power:NN<br>root-towers:ROOT<br>tower-distance:PREP_IN<br>tower-background:PREP_IN<br>tower-city:NN<br>monument-the:DET<br>shot-clear:AMOD<br>tower-pearl:NN<br>building-highest:AMOD<br>tower-center:PREP_IN<br>root-monument:ROOT<br>sign-hollywood:NN<br>house-light:AMOD |
| 330                    |  | house,architecture,historic<br>maryland,architecture,buildings<br>structure,buildings,clouds<br>rural,barn,old<br>historic,house,texas | house-beautiful:AMOD<br>view-house:PREP_OF<br>sits-house:NSUBJ<br>house-big:AMOD<br>building-oldest:AMOD<br>cute-house:DOBJ<br>house-large:AMOD<br>building-small:AMOD<br>house-stone:NN<br>house-old:AMOD<br>house-brick:NN<br>building-stone:NN<br>looks-house:NSUBJ<br>picture-house:PREP_OF<br>house-typical:AMOD          |
| Continued on next page |                                                                                     |                                                                                                                                        |                                                                                                                                                                                                                                                                                                                                |

Table1 – continued from previous page

| Index | Image                                                                               | NUS-WIDE Concepts                                                                                                                                 | SBU Concepts                                                                                                                                                                                                                                                                                                                                      |
|-------|-------------------------------------------------------------------------------------|---------------------------------------------------------------------------------------------------------------------------------------------------|---------------------------------------------------------------------------------------------------------------------------------------------------------------------------------------------------------------------------------------------------------------------------------------------------------------------------------------------------|
| 331   |    | buildings,building,travel<br>maryland,architecture,buildings<br>houses,building,historic<br>building,church,europe<br>historic,house,texas        | house-building:DEP<br>house-district:PREP_IN<br>window-top:AMOD<br>looks-building:NSUBJ<br>house-pink:AMOD<br>building-town:PREP_IN<br>buildings-colorful:AMOD<br>houses-now:ADVMOD<br>house-house:NSUBJ<br>house-beautiful:AMOD<br>building-historic:AMOD<br>floor-bottom:AMOD<br>house-victorian:AMOD<br>cute-house:DOBJ<br>house-colorful:AMOD |
| 332   |   | earthquake,copyright,malaysia<br>suburban,arizona,landscape<br>pool,apartments,architecture<br>steps,green,red<br>maryland,architecture,buildings | house-house:DEP<br>has-house:NSUBJ<br>root-cabin:ROOT<br>house-road:PREP_ON<br>root-home:ROOT<br>house-typical:AMOD<br>sits-house:NSUBJ<br>system-water:NN<br>middle-street:PREP_OF<br>house-middle:PREP_IN<br>corner-house:PREP_OF<br>plant-treatment:NN<br>beds-flower:NN<br>house-beautiful:AMOD<br>wall-retaining:AMOD                        |
| 333   |  | furniture,chairs,retro<br>design,interior,furniture<br>home,interior,design<br>house,home,interior<br>photos,art,photograph                       | chairs-the:DET<br>table-room:PREP_IN<br>floor-new:AMOD<br>floor-room:PREP_IN<br>floor-fourth:AMOD<br>table-chairs:CONJ_AND<br>bed-room:PREP_IN<br>bed-size:NN<br>sit-chair:PREP_IN<br>table-side:NN<br>floor-wood:NN<br>root-downstairs:ROOT<br>bed-queen:NN<br>table-kitchen:PREP_IN<br>carpet-the:DET                                           |

Continued on next page



**Table1 – continued from previous page**

| Index                  | Image                                                                               | NUS-WIDE Concepts                                                                                                             | SBU Concepts                                                                                                                                                                                                                                                                                                             |
|------------------------|-------------------------------------------------------------------------------------|-------------------------------------------------------------------------------------------------------------------------------|--------------------------------------------------------------------------------------------------------------------------------------------------------------------------------------------------------------------------------------------------------------------------------------------------------------------------|
| 334                    |    | traffic,california,bridge<br>road,clouds,landscape<br>railroad,clouds,bridge<br>highway,night,traffic<br>railing,night,sunset | root-highway:ROOT<br>view-road:PREP_OF<br>over-bridge:POBJ<br>crossing-river:PREP_OVER<br>highway-the:DET<br>highway-a:DET<br>road-winding:AMOD<br>taken-car:PREP_FROM<br>looking-bridge:DOBJ<br>one-roads:PREP_OF<br>line-train:NN<br>root-views:ROOT<br>root-roads:ROOT<br>car-driving:VMOD<br>view-car:PREP_FROM      |
| 335                    |   | mosques,asia,islam<br>islam,arch,culture<br>mosque,pakistan,spain<br>monks,monastery,church<br>ancient,building,europe        | building-red:AMOD<br>building-old:AMOD<br>arches-the:DET<br>mosque-the:DET<br>mansion-the:DET<br>arch-the:DET<br>workers-the:DET<br>root-arch:ROOT<br>courtyard-a:DET<br>courtyard-the:DET<br>root-main:ROOT<br>built-century:PREP_IN<br>court-the:DET<br>church-stone:NN<br>root-people:ROOT                            |
| 336                    |  | landscapes,scenery,countryside<br>creek,green,forest<br>forest,mountains,clouds<br>paradise,ocean,sea<br>gardens,trees,tree   | plants-green:AMOD<br>swamp-the:DET<br>trees-olive:AMOD<br>view-hill:PREP_FROM<br>trees-banana:NN<br>birds-white:AMOD<br>hillside-the:DET<br>life-plant:NN<br>tree-willow:NN<br>trees-water:PREP_IN<br>surrounded-trees:PREP_BY<br>center-picture:PREP_OF<br>plants-trees:CONJ_AND<br>lot-trees:PREP_OF<br>trees-fruit:NN |
| Continued on next page |                                                                                     |                                                                                                                               |                                                                                                                                                                                                                                                                                                                          |

Table1 – continued from previous page

| Index | Image                                                                               | NUS-WIDE Concepts                                                                                                                     | SBU Concepts                                                                                                                                                                                                                                                                                                                                  |
|-------|-------------------------------------------------------------------------------------|---------------------------------------------------------------------------------------------------------------------------------------|-----------------------------------------------------------------------------------------------------------------------------------------------------------------------------------------------------------------------------------------------------------------------------------------------------------------------------------------------|
| 337   |    | mac,black,music<br>bus>window,urban<br>agent,night,street<br>ontario,mall,city<br>weapons,art,sign                                    | root-store:ROOT<br>root-books:ROOT<br>market-place:NN<br>sign-glass:NN<br>sign-little:AMOD<br>window-restaurant:PREP_OF<br>signs-old:AMOD<br>root-signs:ROOT<br>root-machine:ROOT<br>sign-bar:NN<br>sign-red:AMOD<br>bar-little:AMOD<br>box-mail:NN<br>sign-neon:NN<br>shelf-book:NN                                                          |
| 338   |   | restaurant,street,people<br>mall,shop,ontario<br>ontario,mall,city<br>interior,light,museum<br>shops,urban,japan                      | root-bar:ROOT<br>root-reflection:ROOT<br>lobby-the:DET<br>casino-the:DET<br>floor-ground:NN<br>reflection-window:PREP_IN<br>glass-windows:PREP_IN<br>wall-glass:NN<br>area-floor:NN<br>area-bar:NN<br>floor-fourth:AMOD<br>station-a:DET<br>balcony-floor:NN<br>floor-top:AMOD<br>apartment-floor:NN                                          |
| 339   |  | house,architecture,historic<br>structure,buildings,clouds<br>rural,barn,old<br>architecture,buildings,night<br>home,architecture,door | covered-bridge:DOBJ<br>sits-house:NSUBJ<br>looks-house:NSUBJ<br>view-house:PREP_OF<br>cute-house:DOBJ<br>picture-house:PREP_OF<br>building-small:AMOD<br>bridge-covered:AMOD<br>house-typical:AMOD<br>house-front:PREP_IN<br>house-beautiful:AMOD<br>house-area:PREP_IN<br>house-lake:PREP_BY<br>house-mountains:PREP_IN<br>house-lived:RCMOD |

Continued on next page

Table1 – continued from previous page

| Index | Image                                                                               | NUS-WIDE Concepts                                                                                                                     | SBU Concepts                                                                                                                                                                                                                                                                                                  |
|-------|-------------------------------------------------------------------------------------|---------------------------------------------------------------------------------------------------------------------------------------|---------------------------------------------------------------------------------------------------------------------------------------------------------------------------------------------------------------------------------------------------------------------------------------------------------------|
| 340   | 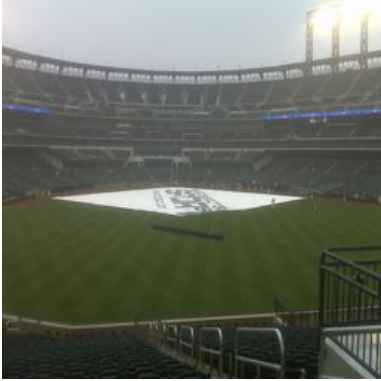   | chicago,water,lake<br>glass,green,water<br>aviation,fighter,california<br>lights,clouds,sunset<br>airport,travel,architecture         | bridge-longest:AMOD<br>ferry-a:DET<br>platform-the:DET<br>plant-water:NN<br>bridge-big:AMOD<br>train-the:DET<br>view-car:PREP_FROM<br>tracks-train:NN<br>floor-6th:AMOD<br>bridge-rail:NN<br>track-the:DET<br>floor-hotel:PREP_OF<br>window-train:NN<br>bridge-water:PREP_IN<br>water-bridge:PREP_UNDER       |
| 341   |   | airforce,vietnam,navy<br>tent,magic,war<br>hospital,people,california<br>international,beach,spain<br>athlete,football,baseball       | shirt-blue:AMOD<br>me-shirt:PREP_IN<br>root-team:ROOT<br>guy-shirt:PREP_IN<br>video-a:DET<br>waiting-line:PREP_IN<br>girl-the:DET<br>girls-hats:PREP_IN<br>one-shirt:PREP_IN<br>root-men:ROOT<br>guy-hat:PREP_IN<br>jacket-black:AMOD<br>family-the:DET<br>hat-white:AMOD<br>root-dogs:ROOT                   |
| 342   |  | tower,europe,france<br>buildings,building,travel<br>facade,church,night<br>tourist,temple,portugal<br>maryland,architecture,buildings | clock-tower:DEP<br>tower-clock:NN<br>built-century:PREP_IN<br>tower-square:PREP_IN<br>building-built:VMOD<br>square-main:AMOD<br>square-town:NN<br>wall-city:NN<br>hall-town:NN<br>clock-the:DET<br>tower-center:PREP_IN<br>building-oldest:AMOD<br>building-brown:AMOD<br>root-clock:ROOT<br>tower-main:AMOD |

Continued on next page

**Table1 – continued from previous page**

| Index | Image                                                                               | NUS-WIDE Concepts                                                                                                                   | SBU Concepts                                                                                                                                                                                                                                                                                                         |
|-------|-------------------------------------------------------------------------------------|-------------------------------------------------------------------------------------------------------------------------------------|----------------------------------------------------------------------------------------------------------------------------------------------------------------------------------------------------------------------------------------------------------------------------------------------------------------------|
| 343   |    | interior,furniture,house<br>home,interior,design<br>furniture,architecture,interior<br>carpet,room,chair<br>kitchen,interior,design | room-living:NN<br>room-new:AMOD<br>bedroom-house:PREP_OF<br>root-downstairs:ROOT<br>has-bedroom:NSUBJ<br>room-dining:NN<br>doors-french:AMOD<br>bedroom-master:NN<br>room-bed:NN<br>standing-bedroom:PREP_IN<br>room-kitchen:CONJ_AND<br>dining-room:DOBJ<br>door-looking:VMOD<br>bedroom-new:AMOD<br>floor-1st:AMOD |
| 344   |   | fish-eye,portrait,closeup<br>automobile,transportation,vintage<br>floor,people,black<br>mug,dog,pet<br>vehicle,vintage,automobile   | seat-driver:POSS<br>girl-car:PREP_IN<br>root-seat:ROOT<br>dog-bag:PREP_IN<br>seat-the:DET<br>sleeping-car:PREP_IN<br>seat-a:DET<br>truck-the:DET<br>sitting-car:PREP_IN<br>seat-passenger:NN<br>seat-car:NN<br>seat-front:AMOD<br>me-car:PREP_IN<br>sit-to:AUX<br>holder-the:DET                                     |
| 345   |  | hill,italy,italia<br>fields,scotland,blue<br>rural,landscape,clouds<br>field,clouds,blue<br>countryside,clouds,green                | root-field:ROOT<br>field-soccer:NN<br>field-rice:NN<br>field-front:PREP_IN<br>field-ball:NN<br>root-fields:ROOT<br>field-wheat:NN<br>fields-the:DET<br>field-the:DET<br>view-field:PREP_OF<br>root-camp:ROOT<br>field-beautiful:AMOD<br>plate-home:NN<br>house-distance:PREP_IN<br>middle-field:PREP_OF              |

Continued on next page



Table1 – continued from previous page

| Index                  | Image                                                                               | NUS-WIDE Concepts                                                                                                                           | SBU Concepts                                                                                                                                                                                                                                                                                                           |
|------------------------|-------------------------------------------------------------------------------------|---------------------------------------------------------------------------------------------------------------------------------------------|------------------------------------------------------------------------------------------------------------------------------------------------------------------------------------------------------------------------------------------------------------------------------------------------------------------------|
| 346                    |    | church,interior,gothic<br>palace,interior,india<br>religion,europe,italy<br>stone,arch,architecture<br>mosques,asia,islam                   | house-court:NN<br>door-main:AMOD<br>windows-glass:NN<br>entrance-main:AMOD<br>one-doors:PREP_OF<br>corridor-a:DET<br>building-church:NN<br>view-window:PREP_OF<br>structure-a:DET<br>cabinet-glass:NN<br>reflection-window:NN<br>door-church:PREP_OF<br>century-the:DET<br>tower-white:AMOD<br>doors-the:DET           |
| 347                    |   | shops,fun,florida<br>chairs,interior,office<br>classroom,california,apple<br>retro,modern,furniture<br>cafe,bar,street                      | table-pool:NN<br>root-bar:ROOT<br>tables-the:DET<br>table-house:PREP_IN<br>kitchen-house:PREP_IN<br>area-bar:NN<br>table-bar:PREP_IN<br>tables-chairs:CONJ_AND<br>root-tables:ROOT<br>table-chairs:CONJ_AND<br>root-kitchen:ROOT<br>shopping-window:NN<br>boat-house:NN<br>fish-market:CONJ_AND<br>market-seafood:NN   |
| 348                    |  | interior,furniture,house<br>kitchen,interior,design<br>design,interior,furniture<br>home,interior,design<br>furniture,architecture,interior | living-room:DOBJ<br>root-downstairs:ROOT<br>bedroom-master:NN<br>looking-room:PREP_INTO<br>room-kitchen:CONJ_AND<br>walk-closet:PREP_IN<br>leads-door:NSUBJ<br>room-great:AMOD<br>room-family:NN<br>room-living:AMOD<br>root-bedroom:ROOT<br>has-bedroom:NSUBJ<br>root-upstairs:ROOT<br>room-new:AMOD<br>space-the:DET |
| Continued on next page |                                                                                     |                                                                                                                                             |                                                                                                                                                                                                                                                                                                                        |

Table1 – continued from previous page

| Index                  | Image                                                                               | NUS-WIDE Concepts                                                                                                              | SBU Concepts                                                                                                                                                                                                                                                                                                                 |
|------------------------|-------------------------------------------------------------------------------------|--------------------------------------------------------------------------------------------------------------------------------|------------------------------------------------------------------------------------------------------------------------------------------------------------------------------------------------------------------------------------------------------------------------------------------------------------------------------|
| 349                    |    | restaurant,street,people<br>islam,arch,culture<br>design,interior,furniture<br>hotel,room,street<br>interior,furniture,house   | style-the:DET<br>root-front:ROOT<br>room-new:AMOD<br>wall-back:AMOD<br>door-main:AMOD<br>fireplace-the:DET<br>wall-west:AMOD<br>arch-the:DET<br>building-church:NN<br>style-door:NN<br>room-living:AMOD<br>addition-the:DET<br>root-room:ROOT<br>door-looking:VMOD<br>room-great:AMOD                                        |
| 350                    |   | pond,trees,reflections<br>autumn,trees,forest<br>painting,landscape,water<br>fall,tree,forest<br>spring,trees,landscape        | green-red:CONJ_AND<br>plant-flowers:DOBJ<br>red-orange:CONJ_AND<br>flowers-orange:AMOD<br>trees-colorful:AMOD<br>flowers-colorful:AMOD<br>colors-beautiful:AMOD<br>trees-bloom:PREP_IN<br>colours-the:DET<br>root-gardens:ROOT<br>creek-a:DET<br>flower-bed:DEP<br>foliage-the:DET<br>color-yellow:AMOD<br>root-beds:ROOT    |
| 351                    |  | umbrella,street,people<br>uniform,military,soldiers<br>march,protest,england<br>protesters,california,war<br>people,city,night | dress-traditional:AMOD<br>cross-street:DOBJ<br>streets-the:DET<br>house-opera:NN<br>walking-bridge:DOBJ<br>walking-street:DOBJ<br>walking-street:PREP_ON<br>middle-street:PREP_OF<br>root-women:ROOT<br>standing-me:NSUBJ<br>root-walks:ROOT<br>standing-'re:AUX<br>root-walkway:ROOT<br>street-city:PREP_IN<br>coat-the:DET |
| Continued on next page |                                                                                     |                                                                                                                                |                                                                                                                                                                                                                                                                                                                              |

**Table1 – continued from previous page**

| Index | Image                                                                               | NUS-WIDE Concepts                                                                                                           | SBU Concepts                                                                                                                                                                                                                                                                          |
|-------|-------------------------------------------------------------------------------------|-----------------------------------------------------------------------------------------------------------------------------|---------------------------------------------------------------------------------------------------------------------------------------------------------------------------------------------------------------------------------------------------------------------------------------|
| 352   |    | ice,frost,crystals<br>cold,water,frozen<br>illustration,commercials,portfolio<br>holiday,christmas,fun<br>kiss,photos,apple | covered-snow:PREP_IN<br>snow-the:DET<br>root-white:ROOT<br>stone-white:AMOD<br>shape-the:DET<br>stuff-white:AMOD<br>beauty-a:DET<br>size-the:DET<br>root-crazy:ROOT<br>root-rain:ROOT<br>root-snap:ROOT<br>beach-pebble:AMOD<br>shape-a:DET<br>snow-white:AMOD<br>study-white:PREP_IN |
| 353   |   | boats,pier,fun<br>canal,houseboat,barge<br>march,protest,england<br>red,light,colors<br>valleys,pakistan,tourism            | boats-many:AMOD<br>tour-a:DET<br>cars-no:NEG<br>district-light:NN<br>traffic-the:DET<br>locals-the:DET<br>car-cable:NN<br>boy-boat:PREP_IN<br>bus-city:NN<br>boat-river:NN<br>team-the:DET<br>canoe-a:DET<br>car-street:NN<br>area-water:NN<br>booth-the:DET                          |
| 354   |  | sand,waves,blue<br>islands,beach,maldives<br>beach,landscape,clouds<br>sand,landscape,clouds<br>oahu,surf,waves             | salt-the:DET<br>sand-white:AMOD<br>root-dunes:ROOT<br>bar-sand:NN<br>beach-white:AMOD<br>dune-the:DET<br>beach-sandy:AMOD<br>beach-bay:NN<br>gulf-the:DET<br>lake-salt:NN<br>beach-coast:PREP_ON<br>sand-a:DET<br>wave-the:DET<br>beach-island:PREP_IN<br>week-a:DET                  |

Continued on next page

**Table1 – continued from previous page**

| Index | Image                                                                               | NUS-WIDE Concepts                                                                                                           | SBU Concepts                                                                                                                                                                                                                                                                                                                    |
|-------|-------------------------------------------------------------------------------------|-----------------------------------------------------------------------------------------------------------------------------|---------------------------------------------------------------------------------------------------------------------------------------------------------------------------------------------------------------------------------------------------------------------------------------------------------------------------------|
| 355   |    | shopping,bazaar,japan<br>shop,market,food<br>plants,trees,tree<br>shops,fun,florida<br>flying,california,pilot              | stall-market:NN<br>floor-top:AMOD<br>tables-chairs:CONJ_AND<br>market-fruit:NN<br>fruit-market:CONJ_AND<br>balcony-the:DET<br>market-outdoor:AMOD<br>shopping-window:NN<br>lobby-the:DET<br>market-flower:NN<br>market-farmer:POSS<br>plants-tomato:NN<br>house-tea:NN<br>root-banana:ROOT<br>fruit-the:DET                     |
| 356   |   | tree,clouds,sunset<br>vacation,island,beach<br>oilfield,kuwait,california<br>texas,clouds,explore<br>interesting,sky,clouds | tree-field:PREP_IN<br>field-corn:NN<br>lone-tree:DEP<br>middle-field:PREP_OF<br>tree-single:AMOD<br>root-lone:ROOT<br>tree-lone:AMOD<br>tree-middle:PREP_IN<br>tree-solitary:AMOD<br>field-open:AMOD<br>tree-hill:PREP_ON<br>standing-tree:NN<br>trees-fruit:NN<br>grows-grass:NSUBJ<br>tree-lonely:AMOD                        |
| 357   |  | vietnam,city,telephones<br>bar,red,images<br>door,windows,house<br>post,night,street<br>court,building,explore              | floor-upper:AMOD<br>window-door:CONJ_AND<br>deco-art:NN<br>office-old:AMOD<br>root-balcony:ROOT<br>window-house:PREP_OF<br>building-classroom:NN<br>house-opera:NN<br>root-iron:ROOT<br>root-theater:ROOT<br>root-steel:ROOT<br>building-downtown:PREP_IN<br>part-house:PREP_OF<br>root-staircase:ROOT<br>door-building:PREP_TO |

Continued on next page



Table1 – continued from previous page

| Index | Image                                                                               | NUS-WIDE Concepts                                                                                                                    | SBU Concepts                                                                                                                                                                                                                                                                                                                       |
|-------|-------------------------------------------------------------------------------------|--------------------------------------------------------------------------------------------------------------------------------------|------------------------------------------------------------------------------------------------------------------------------------------------------------------------------------------------------------------------------------------------------------------------------------------------------------------------------------|
| 358   |    | <p>religion,people,portrait<br/> mural,color,california<br/> festival,india,travel<br/> tent,magic,war<br/> brooklyn,parade,park</p> | <p>children-the:DET<br/> horse-wooden:AMOD<br/> tables-the:DET<br/> horses-white:AMOD<br/> play-the:DET<br/> dress-fancy:AMOD<br/> horse-the:DET<br/> shopping-window:NN<br/> market-a:DET<br/> girl-market:PREP_IN<br/> market-central:AMOD<br/> window-store:NN<br/> in-market:POBJ<br/> shirt-an:DET<br/> store-an:DET</p>      |
| 359   |   | <p>boats,reflections,reflection<br/> fishing,boats,clouds<br/> boat,river,boats<br/> swimming,sky,trees<br/> houses,water,river</p>  | <p>root-boats:ROOT<br/> boats-the:DET<br/> pool-swimming:NN<br/> boats-fishing:NN<br/> boats-wooden:AMOD<br/> village-fishing:NN<br/> boats-house:NN<br/> docks-the:DET<br/> boats-fishing:AMOD<br/> boat-white:AMOD<br/> union-lake:NN<br/> boat-house:NN<br/> root-harbor:ROOT<br/> harbor-the:DET<br/> ship-pirate:AMOD</p>     |
| 360   |  | <p>metal,macro,rust<br/> warehouse,graffiti,rust<br/> rifles,gun,food<br/> ruins,asia,decay<br/> washington,seattle,art</p>          | <p>root-road:ROOT<br/> road-newton:NN<br/> parts-the:DET<br/> road-rock:PREP_NEAR<br/> seats-house:PREP_IN<br/> city-forbidden:NN<br/> iron-the:DET<br/> area-market:NN<br/> yard-train:NN<br/> seats-the:DET<br/> wire-barbed:AMOD<br/> root-construction:ROOT<br/> car-box:NN<br/> root-seats:ROOT<br/> plant-abandoned:AMOD</p> |

Continued on next page

**Table1 – continued from previous page**

| Index | Image                                                                               | NUS-WIDE Concepts                                                                                                                      | SBU Concepts                                                                                                                                                                                                                                                                                        |
|-------|-------------------------------------------------------------------------------------|----------------------------------------------------------------------------------------------------------------------------------------|-----------------------------------------------------------------------------------------------------------------------------------------------------------------------------------------------------------------------------------------------------------------------------------------------------|
| 361   |    | airport,travel,architecture<br>mosques,turkey,istanbul<br>stadium,architecture,canada<br>life,city,street<br>floor,street,dark         | roof-glass:NN<br>court-the:DET<br>ground-zero:NUM<br>mosque-the:DET<br>buildings-new:AMOD<br>ceiling-the:DET<br>dome-the:DET<br>floors-the:DET<br>mall-shopping:NN<br>station-a:DET<br>dome-glass:NN<br>root-dome:ROOT<br>roof-building:PREP_OF<br>mall-a:DET<br>root-floor:ROOT                    |
| 362   |   | mountains,winter,mountain<br>mountain,snow,winter<br>aerial,blue,sea<br>ice,blue,glacier<br>glacier,sky,nature                         | alps-the:DET<br>feet-:NUM<br>summit-the:DET<br>mountains-white:AMOD<br>root-mountain:ROOT<br>covered-snow:NSUBJ<br>peak-the:DET<br>root-icy:ROOT<br>mountain-the:DET<br>root-snow:ROOT<br>top-mountain:PREP_OF<br>mountain-table:NN<br>plane-small:AMOD<br>mountain-highest:AMOD<br>window-plane:NN |
| 363   |  | racing,driver,united<br>vehicle,vintage,automobile<br>protesters,london,politics<br>automobile,transportation,vintage<br>race,car,auto | seat-the:DET<br>leather-black:AMOD<br>seat-car:NN<br>seats-car:NN<br>root-seat:ROOT<br>car-the:DET<br>bag-laptop:AMOD<br>seat-passenger:NN<br>root-pants:ROOT<br>seat-front:AMOD<br>root-seats:ROOT<br>man-little:AMOD<br>seat-big:AMOD<br>sleeping-car:PREP_IN<br>back-car:PREP_OF                 |

Continued on next page

Table1 – continued from previous page

| Index | Image                                                                               | NUS-WIDE Concepts                                                                                                            | SBU Concepts                                                                                                                                                                                                                                                                                                                            |
|-------|-------------------------------------------------------------------------------------|------------------------------------------------------------------------------------------------------------------------------|-----------------------------------------------------------------------------------------------------------------------------------------------------------------------------------------------------------------------------------------------------------------------------------------------------------------------------------------|
| 364   |    | kitchen,interior,design<br>design,interior,furniture<br>interior,furniture,house<br>home,interior,design<br>room,design,home | style-the:DET<br>style-door:NN<br>kitchen-a:DET<br>created-style:PREP_WITH<br>window-sink:PREP_OVER<br>view-kitchen:PREP_OF<br>created-kitchen:NSUBJPASS<br>looks-window:NSUBJ<br>kitchen-house:PREP_IN<br>doors-cabinet:NN<br>kitchen-new:AMOD<br>room-house:PREP_OF<br>kitchen-house:PREP_OF<br>area-floor:NN<br>sink-kitchen:PREP_IN |
| 365   |   | restaurant,street,people<br>cafe,bar,street<br>mall,shop,ontario<br>warehouse,graffiti,rust<br>interior,light,museum         | root-bar:ROOT<br>area-bar:NN<br>tables-the:DET<br>sides-both:DET<br>root-kitchen:ROOT<br>kitchen-house:PREP_IN<br>bar-the:DET<br>shopping-window:NN<br>tables-chairs:CONJ_AND<br>view-of:PREP<br>house-tea:NN<br>root-street:ROOT<br>cabin-the:DET<br>room-main:AMOD<br>shops-the:DET                                                   |
| 366   |  | shopping,bazaar,japan<br>store,food,color<br>toys,display,home<br>thailand,monks,burma<br>shop,market,food                   | market-local:AMOD<br>market-fruit:NN<br>root-market:ROOT<br>market-floating:AMOD<br>root-vendor:ROOT<br>market-street:NN<br>market-vegetable:NN<br>root-stand:ROOT<br>stall-market:NN<br>fruit-market:CONJ_AND<br>market-house:PREP_NEAR<br>flower-market:DEP<br>market-open:AMOD<br>stall-market:PREP_IN<br>market-town:PREP_IN        |

Continued on next page



Table1 – continued from previous page

| Index | Image                                                                               | NUS-WIDE Concepts                                                                                                          | SBU Concepts                                                                                                                                                                                                                                                                                                         |
|-------|-------------------------------------------------------------------------------------|----------------------------------------------------------------------------------------------------------------------------|----------------------------------------------------------------------------------------------------------------------------------------------------------------------------------------------------------------------------------------------------------------------------------------------------------------------|
| 367   |    | greece,boats,boat<br>swimming,sky,trees<br>pool,apartments,architecture<br>seaside,england,summer<br>morning,people,coffee | pool-swimming:NN<br>pool-swimming:AMOD<br>boat-house:NN<br>canal-grand:NN<br>river-background:PREP_IN<br>section-the:DET<br>root-harbor:ROOT<br>root-fort:ROOT<br>park-water:NN<br>river-phraya:NN<br>river-bridge:CONJ_AND<br>ferry-a:DET<br>village-fishing:NN<br>tables-chairs:CONJ_AND<br>taxi-water:NN          |
| 368   |   | mosques,asia,islam<br>arch>window,brick<br>tourist,temple,portugal<br>stone,architecture,old<br>europa,city,church         | doorway-a:DET<br>century-the:DET<br>building-random:AMOD<br>city-old:NN<br>building-built:VMOD<br>house-town:PREP_IN<br>built-century:PREP_IN<br>clock-water:NN<br>had-building:NSUBJ<br>houses-now:ADVMOD<br>root-entrance:ROOT<br>root-ornate:ROOT<br>house-century:NN<br>building-government:NN<br>house-court:NN |
| 369   |  | shops,fun,florida<br>fashion,history,young<br>shopping,bazaar,japan<br>store,people,street<br>shop,market,food             | root-market:ROOT<br>shops-the:DET<br>market-local:AMOD<br>market-house:PREP_NEAR<br>buy-to:AUX<br>market-largest:AMOD<br>market-the:DET<br>market-morning:PREP_IN<br>shopping-window:NN<br>market-fish:NN<br>root-buy:ROOT<br>office-box:NN<br>town-china:NN<br>market-place:NN<br>root-fresh:ROOT                   |

Continued on next page



**Table1 – continued from previous page**

| Index | Image                                                                               | NUS-WIDE Concepts                                                                                                                          | SBU Concepts                                                                                                                                                                                                                                                                                                              |
|-------|-------------------------------------------------------------------------------------|--------------------------------------------------------------------------------------------------------------------------------------------|---------------------------------------------------------------------------------------------------------------------------------------------------------------------------------------------------------------------------------------------------------------------------------------------------------------------------|
| 370   |    | landscapes,scenery,countryside<br>tundra,colorado,mountain<br>oilfield,kuwait,california<br>mountains,trees,water<br>landscape,field,green | pasture-the:DET<br>root-pasture:ROOT<br>hillside-the:DET<br>root-farm:ROOT<br>pasture-horse:NN<br>taken-road:PREP_FROM<br>pasture-cow:NN<br>pasture-a:DET<br>hill-small:AMOD<br>mountains-blue:NN<br>landscape-a:DET<br>top-hill:NN<br>crater-the:DET<br>view-field:PREP_OF<br>valley-river:NN                            |
| 371   |   | tourist,temple,portugal<br>heritage,trip,church<br>tourism,europe,trip<br>maryland,architecture,buildings<br>lawn,house,architecture       | root-temple:ROOT<br>building-oldest:AMOD<br>bell-the:DET<br>built-century:PREP_IN<br>tower-castle:PREP_IN<br>century-17th:AMOD<br>root-palace:ROOT<br>church-old:AMOD<br>building-main:AMOD<br>century-the:DET<br>house-district:PREP_IN<br>building-capital:NN<br>town-little:AMOD<br>stone-red:AMOD<br>house-century:NN |
| 372   |  | road,city,people<br>underground,people,street<br>locomotive,bridge,track<br>oilfield,art,museum<br>bus,abandoned,clouds                    | train-the:DET<br>train-a:DET<br>bus-school:NN<br>truck-yellow:AMOD<br>car-yellow:AMOD<br>car-street:NN<br>train-little:AMOD<br>building-yellow:AMOD<br>car-train:NN<br>train-car:NN<br>cars-two:NUM<br>house-field:NN<br>train-line:NN<br>root-waits:ROOT<br>waiting-train:PREP_FOR                                       |

Continued on next page

**Table1 – continued from previous page**

| Index | Image                                                                               | NUS-WIDE Concepts                                                                                                                | SBU Concepts                                                                                                                                                                                                                                                                                                                                         |
|-------|-------------------------------------------------------------------------------------|----------------------------------------------------------------------------------------------------------------------------------|------------------------------------------------------------------------------------------------------------------------------------------------------------------------------------------------------------------------------------------------------------------------------------------------------------------------------------------------------|
| 373   |    | oilfield,art,museum<br>pole,street,green<br>antenna,car,reflection<br>bench,winter,snow<br>canoe,boat,explore                    | hold-to:AUX<br>lamp-old:AMOD<br>wheel-the:DET<br>root-pump:ROOT<br>system-water:NN<br>pump-water:NN<br>root-figure:ROOT<br>bottle-glass:NN<br>crane-a:DET<br>root-metal:ROOT<br>root-machine:ROOT<br>week-the:DET<br>pump-the:DET<br>cottage-a:DET<br>back-building:PREP_OF                                                                          |
| 374   |   | floor>window,interior<br>modern,interior,furniture<br>design,interior,furniture<br>carpet,room,chair<br>interior,furniture,house | designs-closets:DOBJ<br>builds-closets:NSUBJ<br>designs-closets:NSUBJ<br>closets-office:PREP_FOR<br>designs-builds:CONJ_AND<br>closets-home:PREP_FOR<br>closets-custom:PREP_FOR<br>home-office:CONJ_OR<br>custom-life:NN<br>root-designs:ROOT<br>walk-closet:PREP_IN<br>root-shower:ROOT<br>root-cabinet:ROOT<br>leads-door:NSUBJ<br>wall-kitchen:NN |
| 375   |  | vietnam,soldier,adults<br>airforce,vietnam,navy<br>iraq,military,army<br>army,iraq,kuwait<br>soldier,men,males                   | scene-street:NN<br>village-the:DET<br>market-the:DET<br>scene-a:DET<br>girl-young:AMOD<br>system-water:NN<br>root-children:ROOT<br>temple-a:DET<br>village-a:DET<br>display-window:NN<br>root-group:ROOT<br>fountains-water:NN<br>market-fish:NN<br>fish-market:DEP<br>house-house:DEP                                                               |

Continued on next page

Table1 – continued from previous page

| Index | Image                                                                               | NUS-WIDE Concepts                                                                                                                     | SBU Concepts                                                                                                                                                                                                                                                                                                                                      |
|-------|-------------------------------------------------------------------------------------|---------------------------------------------------------------------------------------------------------------------------------------|---------------------------------------------------------------------------------------------------------------------------------------------------------------------------------------------------------------------------------------------------------------------------------------------------------------------------------------------------|
| 376   |    | hotel,night,lights<br>buildings,building,travel<br>spain,europa,europe<br>tower,europe,france<br>maryland,architecture,buildings      | building-highest:AMOD<br>tower-building:DEP<br>root-buildings:ROOT<br>building-front:PREP_IN<br>building-tall:AMOD<br>towers-the:DET<br>building-tower:NSUBJ<br>building-government:NN<br>building-interesting:AMOD<br>towers-twin:AMOD<br>building-city:NN<br>buildings-many:AMOD<br>tower-building:PREP_OF<br>root-rises:ROOT<br>towers-two:NUM |
| 377   |   | bleu,red,explore<br>cellphones,library,sign<br>gun,death,art<br>flight,plane,aviation<br>april,architecture,city                      | door-blue:AMOD<br>house-dog:NN<br>blue-the:DET<br>light-blue:AMOD<br>blue-white:CONJ_AND<br>window-truck:PREP_OF<br>root-dream:ROOT<br>box-mail:NN<br>logo-the:DET<br>root-door:ROOT<br>root-blue:ROOT<br>black-blue:CONJ_AND<br>car-white:AMOD<br>root-lock:ROOT<br>root-white:ROOT                                                              |
| 378   |  | bathroom,abandoned,interior<br>design,interior,furniture<br>interior,furniture,house<br>home,interior,design<br>floor>window,interior | root-bathroom:ROOT<br>bathroom-floor:NN<br>bathroom-house:PREP_IN<br>sink-bathroom:PREP_IN<br>root-shower:ROOT<br>bathroom-the:DET<br>toilet-the:DET<br>tub-the:DET<br>bathroom-guest:NN<br>cabinet-medicine:NN<br>shower-the:DET<br>root-bathtub:ROOT<br>bath-master:NN<br>bathroom-new:AMOD<br>curtain-shower:NN                                |

Continued on next page

**Table1 – continued from previous page**

| Index                  | Image                                                                               | NUS-WIDE Concepts                                                                                                   | SBU Concepts                                                                                                                                                                                                                                                                                                               |
|------------------------|-------------------------------------------------------------------------------------|---------------------------------------------------------------------------------------------------------------------|----------------------------------------------------------------------------------------------------------------------------------------------------------------------------------------------------------------------------------------------------------------------------------------------------------------------------|
| 379                    |    | train,sky,city<br>chicago,water,lake<br>railway,bridge,steam<br>barge,harbour,sea<br>football,stadium,sport         | train-passenger:NN<br>passes-train:NSUBJ<br>tracks-train:NN<br>train-car:NN<br>passing-bridge:PREP_UNDER<br>platform-the:DET<br>train-freight:NN<br>line-train:NN<br>root-train:ROOT<br>passes-bridge:PREP_UNDER<br>root-passes:ROOT<br>root-view:ROOT<br>view-window:PREP_FROM<br>view-building:PREP_FROM<br>lock-the:DET |
| 380                    |   | long,car,road<br>nighttime,street,downtown<br>subway,tunnel,light<br>night,street,traffic<br>shop,architecture,mall | root-lights:ROOT<br>train-passenger:NN<br>station-street:NN<br>bridge-highway:PREP_OVER<br>traffic-the:DET<br>root-exposure:ROOT<br>seine-the:DET<br>yard-train:NN<br>bridge-station:PREP_NEAR<br>cars-two:NUM<br>port-the:DET<br>root-cars:ROOT<br>bridge-brooklyn:NN<br>bridge-water:NN<br>car-street:PREP_IN            |
| 381                    |  | roadblock,water,tree<br>police,car,cars<br>iraq,army,military<br>uniform,world,historic<br>canal,houseboat,barge    | washing-clothes:DOBJ<br>water-white:AMOD<br>canoe-water:NSUBJ<br>canoe-trip:DOBJ<br>trees-plant:NN<br>root-canoe:ROOT<br>locals-the:DET<br>up-mountain:POBJ<br>canoe-june:PREP_IN<br>building-bridge:DOBJ<br>water-rafting:VMOD<br>canoe-river:PREP_DOWN<br>adventure-days:PREP_OVER<br>canoe-a:DET<br>house-tea:NN        |
| Continued on next page |                                                                                     |                                                                                                                     |                                                                                                                                                                                                                                                                                                                            |



**Table1 – continued from previous page**

| Index | Image                                                                               | NUS-WIDE Concepts                                                                                                                       | SBU Concepts                                                                                                                                                                                                                                                                                                                                 |
|-------|-------------------------------------------------------------------------------------|-----------------------------------------------------------------------------------------------------------------------------------------|----------------------------------------------------------------------------------------------------------------------------------------------------------------------------------------------------------------------------------------------------------------------------------------------------------------------------------------------|
| 382   |    | interior,furniture,house<br>design,interior,furniture<br>furniture,architecture,interior<br>office,apple,mac<br>kitchen,interior,design | living-room:DOBJ<br>area-floor:NN<br>kitchen-house:NN<br>fireplace-the:DET<br>room-kitchen:CONJ_AND<br>door-looking:VMOD<br>view-kitchen:PREP_OF<br>room-living:AMOD<br>root-upstairs:ROOT<br>root-lounge:ROOT<br>in-room:POBJ<br>looking-room:PREP_INTO<br>room-living:NN<br>lounge-the:DET<br>tv-screen:NN                                 |
| 383   |   | decoration,home,room<br>paintings,colors,home<br>pictures,fun,friends<br>small,big,man<br>home,interior,design                          | root-room:ROOT<br>wall-room:PREP_IN<br>wall-office:PREP_IN<br>root-wall:ROOT<br>class-the:DET<br>area-bar:NN<br>root-suite:ROOT<br>tv-screen:NN<br>room-the:DET<br>hats-the:DET<br>room-living:AMOD<br>bar-little:AMOD<br>standing-door:PREP_IN<br>bedroom-house:PREP_IN<br>wall-back:AMOD                                                   |
| 384   |  | vegetables,color,people<br>fruit,market,vegetables<br>market,vegetables,red<br>muslim,market,israel<br>school,girls,girl                | market-flower:NN<br>market-fruit:NN<br>flowers-orange:AMOD<br>shop-flower:NN<br>fruit-market:CONJ_AND<br>market-farmer:POSS<br>market-vegetable:NN<br>flower-market:DEP<br>root-fruit:ROOT<br>flowers-market:PREP_IN<br>yellow-orange:CONJ_AND<br>stall-market:PREP_IN<br>stand-market:PREP_IN<br>market-farmers:NN<br>flowers-house:PREP_IN |

Continued on next page

Table1 – continued from previous page

| Index                  | Image                                                                               | NUS-WIDE Concepts                                                                                                                  | SBU Concepts                                                                                                                                                                                                                                                                                                                                  |
|------------------------|-------------------------------------------------------------------------------------|------------------------------------------------------------------------------------------------------------------------------------|-----------------------------------------------------------------------------------------------------------------------------------------------------------------------------------------------------------------------------------------------------------------------------------------------------------------------------------------------|
| 385                    |    | politics,people,news<br>men,male,sports<br>males,room,furniture<br>prison,orange,woman<br>adults,suits,room                        | shirt-orange:AMOD<br>girls-kitchen:PREP_IN<br>root-helps:ROOT<br>boys-kitchen:PREP_IN<br>shirt-an:DET<br>book-new:AMOD<br>take-home:DOBJ<br>man-the:DET<br>guy-the:DET<br>table-kitchen:NN<br>kitchen-a:DET<br>boy-the:DET<br>market-food:NN<br>root-student:ROOT<br>guy-shirt:PREP_IN                                                        |
| 386                    |   | desert,cactus,sunset<br>nevada,light,night<br>cross,graveyard,clouds<br>palm,sand,island<br>barcelona,landscape,tree               | trees-palm:NN<br>tower-phone:NN<br>palm-trees:DOBJ<br>tower-cell:NN<br>root-towers:ROOT<br>root-palm:ROOT<br>looks-sky:NSUBJ<br>tree-palm:NN<br>clouds-background:PREP_IN<br>standing-tall:ACOMP<br>sky-sunny:AMOD<br>water-tower:DEP<br>crane-the:DET<br>trees-three:NUM<br>sign-hollywood:NN                                                |
| 387                    |  | tourism,europe,trip<br>cool,california,building<br>tourist,temple,portugal<br>china,water,landscape<br>house,architecture,historic | building-largest:AMOD<br>structure-wooden:AMOD<br>root-design:ROOT<br>building-in:PREP<br>statue-buddha:PREP_OF<br>buildings-many:AMOD<br>building-statue:DEP<br>building-wooden:AMOD<br>house-beach:PREP_IN<br>house-front:PREP_IN<br>beach-house:DEP<br>statue-massive:AMOD<br>house-beach:PREP_ON<br>house-lived:RCMOD<br>root-temple:ROOT |
| Continued on next page |                                                                                     |                                                                                                                                    |                                                                                                                                                                                                                                                                                                                                               |

**Table1 – continued from previous page**

| Index                  | Image                                                                               | NUS-WIDE Concepts                                                                                                    | SBU Concepts                                                                                                                                                                                                                                                                                                           |
|------------------------|-------------------------------------------------------------------------------------|----------------------------------------------------------------------------------------------------------------------|------------------------------------------------------------------------------------------------------------------------------------------------------------------------------------------------------------------------------------------------------------------------------------------------------------------------|
| 388                    |    | chairs,interior,office<br>modern,interior,furniture<br>chair,room,office<br>waiting,bench,chair<br>cloudy,cactus,wet | tables-chairs:CONJ_AND<br>chairs-the:DET<br>classroom-a:DET<br>root-chairs:ROOT<br>space-the:DET<br>tables-the:DET<br>lab-computer:NN<br>floor-fourth:AMOD<br>system-the:DET<br>hostel-the:DET<br>desk-a:DET<br>rooms-the:DET<br>shopping-window:NN<br>move-to:AUX<br>table-chairs:CONJ_AND                            |
| 389                    |   | view,night,city<br>sign,night,building<br>california,bridge,city<br>road,city,people<br>history,museum,historical    | window-hotel:NN<br>field-soccer:NN<br>distance-the:DET<br>view-balcony:PREP_FROM<br>view-building:PREP_IN<br>from-window:POBJ<br>school-the:DET<br>house-field:NN<br>road-beach:NN<br>mill-paper:NN<br>building-white:AMOD<br>building-background:PREP_IN<br>town-beach:NN<br>hill-background:PREP_IN<br>window-bus:NN |
| 390                    |  | shops,fun,florida<br>underground,people,street<br>subway,people,graffiti<br>engine,art,nature<br>war,world,army      | machine-flying:AMOD<br>street-narrow:AMOD<br>street-a:DET<br>store-book:NN<br>scene-the:DET<br>door-dag:DEP<br>subway-the:DET<br>market-seafood:NN<br>standing-around:PRT<br>market-central:AMOD<br>shopping-window:NN<br>root-street:ROOT<br>street-city:PREP_IN<br>store-a:DET<br>student-a:DET                      |
| Continued on next page |                                                                                     |                                                                                                                      |                                                                                                                                                                                                                                                                                                                        |

Table1 – continued from previous page

| Index | Image                                                                               | NUS-WIDE Concepts                                                                                                       | SBU Concepts                                                                                                                                                                                                                                                                                                           |
|-------|-------------------------------------------------------------------------------------|-------------------------------------------------------------------------------------------------------------------------|------------------------------------------------------------------------------------------------------------------------------------------------------------------------------------------------------------------------------------------------------------------------------------------------------------------------|
| 391   |    | bridge,bridges,architecture<br>historic,europe,heritage<br>steam,power,tower<br>bazaar,iran,light<br>doorway,arch,stone | built-bridge:NSUBJ<br>root-arch:ROOT<br>road-bridge:DEP<br>bridge-canal:PREP_OVER<br>bridge-stone:NN<br>bridge-over:PRT<br>bridge-arch:AMOD<br>bridge-arch:NN<br>root-bridge:ROOT<br>bridge-old:AMOD<br>bridge-road:NN<br>bridge-bridge:DEP<br>built-bridge:NSUBJPASS<br>bridge-built:VMOD<br>tunnel-a:DET             |
| 392   |   | temple,church,india<br>mall,shop,ontario<br>cafe,bar,street<br>manhattan,traffic,buildings<br>carpet,trees,leaves       | building-state:NN<br>lobby-the:DET<br>tables-chairs:CONJ_AND<br>root-bar:ROOT<br>root-candles:ROOT<br>street-main:NN<br>building-capitol:NN<br>city-the:DET<br>mansion-the:DET<br>shopping-window:NN<br>market-christmas:NN<br>street-city:NN<br>root-christmas:ROOT<br>display-window:NN<br>street-market:NN          |
| 393   |  | restaurant,street,people<br>shop,sign,night<br>phone,red,night<br>store,people,street<br>shops,urban,japan              | sign-door:PREP_ABOVE<br>display-window:NN<br>reflected-window:PREP_IN<br>reflection-window:PREP_IN<br>pub-the:DET<br>office-box:NN<br>window-street:PREP_IN<br>case-the:DET<br>street-shopping:NN<br>root-books:ROOT<br>front-a:DET<br>style-the:DET<br>window-bar:PREP_OF<br>street-main:NN<br>reflected-door:PREP_IN |

Continued on next page



**Table1 – continued from previous page**

| Index | Image                                                                               | NUS-WIDE Concepts                                                                                                                    | SBU Concepts                                                                                                                                                                                                                                                                                                         |
|-------|-------------------------------------------------------------------------------------|--------------------------------------------------------------------------------------------------------------------------------------|----------------------------------------------------------------------------------------------------------------------------------------------------------------------------------------------------------------------------------------------------------------------------------------------------------------------|
| 394   |    | election,photo,london<br>texas,war,field<br>cars,people,police<br>parade,school,old<br>uniform,world,historic                        | shirt-pink:AMOD<br>guy-the:DET<br>shirt-the:DET<br>root-team:ROOT<br>market-local:AMOD<br>ride-the:DET<br>shirt-red:AMOD<br>event-the:DET<br>best-seats:DEP<br>one-shirt:PREP_IN<br>guy-hat:PREP_IN<br>shirt-yellow:AMOD<br>dude-the:DET<br>root-ladies:ROOT<br>waiting-line:PREP_IN                                 |
| 395   |   | subway,people,graffiti<br>underground,people,street<br>mall,shop,ontario<br>shops,fun,florida<br>cafe,bar,street                     | train-sky:NN<br>street-city:PREP_IN<br>car-street:NN<br>waiting-line:PREP_IN<br>street-small:AMOD<br>people-sitting:VMOD<br>home-train:NN<br>street-market:NN<br>show-tv:NN<br>root-people:ROOT<br>train-station:DOBJ<br>door-dag:DEP<br>coach-a:DET<br>home-ride:NN<br>root-team:ROOT                               |
| 396   |  | design,interior,furniture<br>interior,furniture,house<br>modern,interior,furniture<br>home,interior,design<br>retro,modern,furniture | floor-new:AMOD<br>floor-wood:NN<br>area-office:NN<br>basement-the:DET<br>room-kitchen:CONJ_AND<br>root-downstairs:ROOT<br>kitchen-sink:DEP<br>root-upstairs:ROOT<br>standing-kitchen:PREP_IN<br>cabinet-the:DET<br>root-counter:ROOT<br>kitchen-new:AMOD<br>standing-looking:CONJ_AND<br>desk-a:DET<br>room-new:AMOD |

Continued on next page

Table1 – continued from previous page

| Index                  | Image                                                                               | NUS-WIDE Concepts                                                                                                       | SBU Concepts                                                                                                                                                                                                                                                                                                     |
|------------------------|-------------------------------------------------------------------------------------|-------------------------------------------------------------------------------------------------------------------------|------------------------------------------------------------------------------------------------------------------------------------------------------------------------------------------------------------------------------------------------------------------------------------------------------------------|
| 397                    |    | airplane,pilot,fighter<br>camera,lens,city<br>plane,fly,pilot<br>aircraft,pilot,fighter<br>aviation,fighter,california  | show-a:DET<br>root-machine:ROOT<br>machine-a:DET<br>van-a:DET<br>machine-green:AMOD<br>phone-a:DET<br>van-the:DET<br>colors-white:AMOD<br>trucks-the:DET<br>idea-good:AMOD<br>root-computer:ROOT<br>seat-passenger:NN<br>park-car:NN<br>buses-the:DET<br>floor-tower:PREP_OF                                     |
| 398                    |   | waiting,bench,chair<br>telephones,office,room<br>interior,light,museum<br>weapons,art,sign<br>design,interior,furniture | floor-upper:AMOD<br>upstairs-the:DET<br>floor-third:AMOD<br>balcony-a:DET<br>root-upstairs:ROOT<br>floor-top:AMOD<br>floor-fourth:AMOD<br>room-house:PREP_IN<br>windows-floor:NN<br>floor-4th:AMOD<br>space-the:DET<br>room-new:AMOD<br>sign-door:PREP_OVER<br>camera-phone:NN<br>in-building:POBJ               |
| 399                    |  | canyon,utah,sky<br>rocks,blue,mountains<br>hiking,mountain,cliff<br>arizona,sunset,clouds<br>rock,blue,landscape        | canyon-river:NN<br>river-colorado:NN<br>mountain-rock:NN<br>root-canyon:ROOT<br>walls-canyon:NN<br>view-rock:PREP_OF<br>park-canyon:NN<br>floor-valley:NN<br>canyon-the:DET<br>face-rock:PREP_IN<br>root-colorado:ROOT<br>side-mountain:NN<br>bridge-canyon:PREP_OVER<br>highway-coast:NN<br>root-formation:ROOT |
| Continued on next page |                                                                                     |                                                                                                                         |                                                                                                                                                                                                                                                                                                                  |

Table1 – continued from previous page

| Index | Image                                                                               | NUS-WIDE Concepts                                                                                                      | SBU Concepts                                                                                                                                                                                                                                                                                                                  |
|-------|-------------------------------------------------------------------------------------|------------------------------------------------------------------------------------------------------------------------|-------------------------------------------------------------------------------------------------------------------------------------------------------------------------------------------------------------------------------------------------------------------------------------------------------------------------------|
| 400   |    | science,work,glass<br>pottery,home,retro<br>collage,city,light<br>subway,people,graffiti<br>host,high,school           | bags-plastic:AMOD<br>machine-a:DET<br>book-an:DET<br>wall-back:AMOD<br>cabinet-glass:NN<br>wall-one:NUM<br>train-the:DET<br>root-graffiti:ROOT<br>books-the:DET<br>children-the:DET<br>root-wall:ROOT<br>shelves-the:DET<br>root-hold:ROOT<br>paint-to:AUX<br>root-books:ROOT                                                 |
| 401   |   | japan,food,cute<br>smoke,california,demonstration<br>toys,display,home<br>closeup,red,flower<br>trip,summer,people     | shirt-yellow:AMOD<br>root-signs:ROOT<br>store-the:DET<br>bottle-water:PREP_OF<br>sign-yellow:AMOD<br>machine-a:DET<br>root-bar:ROOT<br>yellow-blue:CONJ_AND<br>car-yellow:AMOD<br>idea-good:AMOD<br>vendor-a:DET<br>market-farmer:POSS<br>display-window:NN<br>shirt-an:DET<br>root-stand:ROOT                                |
| 402   |  | tollbooth,illinois,chicago<br>valley,plane,weather<br>metro,texas,high<br>road,clouds,landscape<br>aerial,air,military | root-road:ROOT<br>root-highway:ROOT<br>bridge-road:PREP_OVER<br>root-roads:ROOT<br>driving-home:DOBJ<br>highway-the:DET<br>bridge-distance:PREP_IN<br>car-driving:VMOD<br>highway-a:DET<br>one-roads:PREP_OF<br>taken-car:PREP_FROM<br>crossing-bridge:DOBJ<br>building-distance:PREP_IN<br>not-cloud:DEP<br>view-mountain:NN |

Continued on next page

Table1 – continued from previous page

| Index                  | Image                                                                               | NUS-WIDE Concepts                                                                                                                | SBU Concepts                                                                                                                                                                                                                                                                                                 |
|------------------------|-------------------------------------------------------------------------------------|----------------------------------------------------------------------------------------------------------------------------------|--------------------------------------------------------------------------------------------------------------------------------------------------------------------------------------------------------------------------------------------------------------------------------------------------------------|
| 403                    |    | trees,leaves,autumn<br>leaves,trees,fall<br>woods,leaves,path<br>autumn,trees,forest<br>fall,tree,forest                         | trees-forest:PREP_IN<br>root-birch:ROOT<br>trunks-tree:NN<br>stand-trees:PREP_OF<br>trees-birch:AMOD<br>trees-park:PREP_IN<br>root-trees:ROOT<br>trees-all:PREDET<br>forest-a:DET<br>trees-yellow:AMOD<br>tree-woods:PREP_IN<br>woods-the:DET<br>bark-tree:PREP_OF<br>view-trees:PREP_OF<br>trees-black:AMOD |
| 404                    |   | cheerleader,sports,girls<br>athlete,water,surf<br>festival,concert,live<br>music,scientists,microphones<br>ohio,state,university | band-the:DET<br>shirt-orange:AMOD<br>seat-house:PREP_IN<br>playing-guitar:DOBJ<br>crowd-the:DET<br>seat-best:AMOD<br>shirt-green:AMOD<br>shirt-the:DET<br>ball-beach:NN<br>game-the:DET<br>theater-the:DET<br>boys-girls:CONJ_AND<br>guitar-the:DET<br>set-movie:NSUBJ<br>top-van:NN                         |
| 405                    |  | glacier,alaska,iceland<br>cold,water,frozen<br>surf,coast,nature<br>frozen,blue,landscape<br>ice,blue,glacier                    | bear-polar:AMOD<br>dress-wedding:NN<br>bear-polar:NSUBJ<br>animal-towel:NN<br>one-animals:PREP_OF<br>bag-plastic:AMOD<br>towels-paper:NN<br>ship-bottle:PREP_IN<br>reflection-window:PREP_OF<br>root-ice:ROOT<br>root-dress:ROOT<br>shape-a:DET<br>root-shadow:ROOT<br>number-phone:NN<br>size-the:DET       |
| Continued on next page |                                                                                     |                                                                                                                                  |                                                                                                                                                                                                                                                                                                              |



Table1 – continued from previous page

| Index                  | Image                                                                               | NUS-WIDE Concepts                                                                                                                 | SBU Concepts                                                                                                                                                                                                                                                                               |
|------------------------|-------------------------------------------------------------------------------------|-----------------------------------------------------------------------------------------------------------------------------------|--------------------------------------------------------------------------------------------------------------------------------------------------------------------------------------------------------------------------------------------------------------------------------------------|
| 406                    | 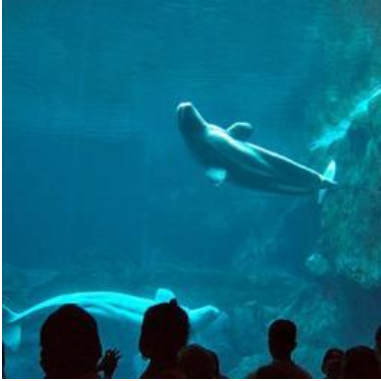   | aquarium,atlanta,georgia<br>islands,fish,underwater<br>scuba,blue,nature<br>maui,pacific,underwater<br>reef,marine,blue           | tank-the:DET<br>boat-glass:NN<br>sea-red:AMOD<br>fish-sea:PREP_IN<br>dive-a:DET<br>reef-barrier:NN<br>fish-blue:AMOD<br>buuren-van:NN<br>reef-great:NN<br>lagoon-blue:AMOD<br>swimming-sea:PREP_IN<br>root-dive:ROOT<br>fish-aquarium:PREP_IN<br>fly-birds:NSUBJ<br>shark-a:DET            |
| 407                    |   | suburban,arizona,landscape<br>tollbooth,illinois,chicago<br>roadblock,truck,belgium<br>runway,flight,aviation<br>truck,sky,clouds | train-passenger:NN<br>road-main:AMOD<br>trailer-a:DET<br>highway-a:DET<br>road-access:NN<br>road-beach:NN<br>cars-no:NEG<br>building-distance:PREP_IN<br>direction-the:DET<br>goes-train:NSUBJ<br>road-coast:NN<br>root-main:ROOT<br>road-ring:NN<br>building-white:AMOD<br>root-road:ROOT |
| 408                    |  | action,sports,game<br>sports,football,game<br>football,white,cheerleader<br>sport,athlete,running<br>tennis,action,grass          | game-a:DET<br>ball-the:DET<br>team-the:DET<br>ball-a:DET<br>event-the:DET<br>seats-box:NN<br>shirt-gray:AMOD<br>ball-basket:NN<br>set-movie:NSUBJ<br>playing-ball:DOBJ<br>shirt-the:DET<br>game-ball:NN<br>game-the:DET<br>movie-silver:NN<br>kid-shirt:PREP_IN                            |
| Continued on next page |                                                                                     |                                                                                                                                   |                                                                                                                                                                                                                                                                                            |

Table1 – continued from previous page

| Index                  | Image                                                                               | NUS-WIDE Concepts                                                                                                                     | SBU Concepts                                                                                                                                                                                                                                                                                                                                           |
|------------------------|-------------------------------------------------------------------------------------|---------------------------------------------------------------------------------------------------------------------------------------|--------------------------------------------------------------------------------------------------------------------------------------------------------------------------------------------------------------------------------------------------------------------------------------------------------------------------------------------------------|
| 409                    |    | kitchen,woman,self<br>design,interior,furniture<br>kitchen,interior,design<br>interior,furniture,house<br>bathroom,abandoned,interior | root-kitchen:ROOT<br>created-style:PREP_WITH<br>kitchen-house:PREP_IN<br>sink-kitchen:PREP_IN<br>style-door:NN<br>created-kitchen:NSUBJPASS<br>root-counter:ROOT<br>cherry-finished:VMOD<br>kitchen-house:PREP_OF<br>style-the:DET<br>created-cherry:PREP_IN<br>kitchen-sink:DEP<br>view-kitchen:PREP_OF<br>has-house:NSUBJ<br>cabinet-kitchen:PREP_IN |
| 410                    |   | leaves,fall,tree<br>breathtaking,blue,animal<br>stream,waterfall,moss<br>fauna,green,bird<br>branch,winter,yellow                     | birds-little:AMOD<br>looking-food:PREP_FOR<br>ground-the:DET<br>sparrow-house:NN<br>bird-little:AMOD<br>house-taken:VMOD<br>root-birds:ROOT<br>birds-baby:NN<br>puddle-a:DET<br>caught-bird:DOBJ<br>runs-water:NSUBJ<br>feeder-the:DET<br>stream-the:DET<br>tree-birch:AMOD<br>delta-okavango:NN                                                       |
| 411                    |  | barn,trees,field<br>mountain,lake,green<br>tent,night,mountains<br>country,barn,canada<br>scenic,mountains,mountain                   | barn-red:AMOD<br>barn-a:DET<br>farm-a:DET<br>house-mountains:PREP_IN<br>root-barn:ROOT<br>barn-field:PREP_IN<br>mountains-green:AMOD<br>root-farm:ROOT<br>tent-the:DET<br>view-scenic:AMOD<br>highway-coast:NN<br>root-tractor:ROOT<br>mountain-highest:AMOD<br>barn-old:AMOD<br>house-field:PREP_IN                                                   |
| Continued on next page |                                                                                     |                                                                                                                                       |                                                                                                                                                                                                                                                                                                                                                        |

**Table1 – continued from previous page**

| Index                  | Image                                                                               | NUS-WIDE Concepts                                                                                                               | SBU Concepts                                                                                                                                                                                                                                                                                                    |
|------------------------|-------------------------------------------------------------------------------------|---------------------------------------------------------------------------------------------------------------------------------|-----------------------------------------------------------------------------------------------------------------------------------------------------------------------------------------------------------------------------------------------------------------------------------------------------------------|
| 412                    |    | shop,sign,night<br>doorway,street,wall<br>cabin,explore>window<br>vietnam,city,telephones<br>entrance,house,stone               | basement-the:DET<br>door-wall:PREP_IN<br>corner-house:PREP_OF<br>wall-area:PREP_IN<br>hostel-the:DET<br>street-an:DET<br>door-house:PREP_TO<br>hole-ground:PREP_IN<br>tree-christmas:AMOD<br>street-small:AMOD<br>apartments-the:DET<br>boxes-the:DET<br>doorway-a:DET<br>root-doors:ROOT<br>corner-the:DET     |
| 413                    |   | belgium,abandoned,castle<br>stairs,railing,urban<br>jail,decay,film<br>prison,madrid,decay<br>geometry,perspective,stairs       | root-corridor:ROOT<br>stairs-the:DET<br>corridor-a:DET<br>root-staircase:ROOT<br>root-balcony:ROOT<br>view-door:PREP_FROM<br>rail-the:DET<br>cross-bridge:NSUBJ<br>bridge-longest:AMOD<br>root-bridge:ROOT<br>corridor-the:DET<br>bridge-glass:NN<br>floor-third:AMOD<br>root-walkway:ROOT<br>goes-bridge:NSUBJ |
| 414                    |  | subway,people,graffiti<br>work,office,apple<br>hospital,people,california<br>business,men,meeting<br>documentary,monks,thailand | hats-the:DET<br>root-student:ROOT<br>chair-black:AMOD<br>root-team:ROOT<br>sitting-desk:PREP_AT<br>girls-kitchen:PREP_IN<br>shirt-an:DET<br>home-ride:NN<br>dress-up:PRT<br>chair-boy:NN<br>train-sky:NN<br>back-van:PREP_OF<br>chairs-the:DET<br>waiting-line:PREP_IN<br>man-hat:PREP_IN                       |
| Continued on next page |                                                                                     |                                                                                                                                 |                                                                                                                                                                                                                                                                                                                 |

**Table1 – continued from previous page**

| Index | Image                                                                               | NUS-WIDE Concepts                                                                                                                                | SBU Concepts                                                                                                                                                                                                                                                                                                                              |
|-------|-------------------------------------------------------------------------------------|--------------------------------------------------------------------------------------------------------------------------------------------------|-------------------------------------------------------------------------------------------------------------------------------------------------------------------------------------------------------------------------------------------------------------------------------------------------------------------------------------------|
| 415   |    | kitchen,interior,design<br>design,interior,furniture<br>interior,furniture,house<br>modern,interior,furniture<br>furniture,architecture,interior | door-looking:VMOD<br>kitchen-looking:VMOD<br>style-door:NN<br>root-downstairs:ROOT<br>room-family:NN<br>leads-door:NSUBJ<br>created-kitchen:NSUBJPASS<br>created-style:PREP_WITH<br>view-kitchen:PREP_OF<br>area-kitchen:NN<br>doors-cabinet:NN<br>root-guest:ROOT<br>kitchen-house:PREP_IN<br>kitchen-new:AMOD<br>looking-room:PREP_INTO |
| 416   |   | interior,furniture,house<br>modern,interior,furniture<br>room,design,home<br>design,interior,furniture<br>furniture,architecture,interior        | bedroom-house:PREP_IN<br>bed-bedroom:PREP_IN<br>bed-queen:NN<br>root-downstairs:ROOT<br>room-guest:NN<br>root-bedroom:ROOT<br>master-the:DET<br>has-bedroom:NSUBJ<br>root-guest:ROOT<br>root-master:ROOT<br>room-bed:NN<br>upstairs-the:DET<br>room-house:PREP_IN<br>bed-size:NN<br>bedroom-house:PREP_OF                                 |
| 417   |  | alaska,mountains,glacier<br>pond,sunset,sky<br>evening,landscape,bravo<br>nsw,coast,beach<br>aerial,blue,sea                                     | water-sky:CONJ_AND<br>river-colorado:NN<br>view-hill:PREP_FROM<br>dots-black:AMOD<br>taken-road:PREP_FROM<br>water-blue:AMOD<br>cliffs-red:AMOD<br>river-snake:NN<br>line-coast:NN<br>rocks-red:AMOD<br>flow-the:DET<br>floor-valley:NN<br>shot-water:PREP_OF<br>blues-the:DET<br>window-way:PREP_ON                                      |

Continued on next page



**Table1 – continued from previous page**

| Index | Image                                                                               | NUS-WIDE Concepts                                                                                                                  | SBU Concepts                                                                                                                                                                                                                                                                                                        |
|-------|-------------------------------------------------------------------------------------|------------------------------------------------------------------------------------------------------------------------------------|---------------------------------------------------------------------------------------------------------------------------------------------------------------------------------------------------------------------------------------------------------------------------------------------------------------------|
| 418   |    | engine,art,nature<br>memorial,architecture,church<br>statue,italy,architecture<br>historical,fun,traditional<br>buddha,light,japan | statue-a:DET<br>statue-the:DET<br>statues-the:DET<br>root-fountain:ROOT<br>root-monument:ROOT<br>root-sculpture:ROOT<br>monument-a:DET<br>house-court:NN<br>root-statue:ROOT<br>lobby-the:DET<br>fountain-the:DET<br>fountain-a:DET<br>temple-the:DET<br>street-lamp:DEP<br>clock-the:DET                           |
| 419   |   | square,abstract,light<br>belgium,abandoned,castle<br>abandoned,film,wall<br>furniture,chairs,retro<br>war,world,army               | floor-kitchen:NN<br>floor-new:AMOD<br>damage-water:NN<br>tiles-floor:NN<br>floor-house:PREP_IN<br>drawer-the:DET<br>root-floor:ROOT<br>floor-wood:NN<br>floor-bedroom:PREP_IN<br>root-fits:ROOT<br>added-house:PREP_IN<br>floor-room:PREP_IN<br>table-room:PREP_IN<br>floor-bathroom:NN<br>added-bedroom:PREP_ABOVE |
| 420   |  | tollbooth,illinois,chicago<br>road,city,people<br>suburban,arizona,landscape<br>truck,sky,clouds<br>metro,texas,high               | root-highway:ROOT<br>highway-the:DET<br>sign-highway:NN<br>over-bridge:POBJ<br>driving-road:DOBJ<br>root-road:ROOT<br>building-distance:PREP_IN<br>airport-the:DET<br>signs-road:NN<br>one-roads:PREP_OF<br>goes-train:NSUBJ<br>highway-a:DET<br>driving-home:DOBJ<br>shot-window:DOBJ<br>view-car:PREP_FROM        |

Continued on next page

Table1 – continued from previous page

| Index                  | Image                                                                               | NUS-WIDE Concepts                                                                                                             | SBU Concepts                                                                                                                                                                                                                                                                                                              |
|------------------------|-------------------------------------------------------------------------------------|-------------------------------------------------------------------------------------------------------------------------------|---------------------------------------------------------------------------------------------------------------------------------------------------------------------------------------------------------------------------------------------------------------------------------------------------------------------------|
| 421                    |    | cemetery,funeral,green<br>green,forest,trees<br>golf,spain,flag<br>spring,trees,landscape<br>graveyard,death,funeral          | fence-white:AMOD<br>green-very:ADV<br>fence-picket:NN<br>grass-lush:AMOD<br>trees-background:PREP_IN<br>house-field:NN<br>house-white:AMOD<br>park-green:AMOD<br>grass-trees:CONJ_AND<br>house-beautiful:AMOD<br>field-baseball:NN<br>field-cow:NN<br>line-trees:PREP_OF<br>trees-bloom:PREP_IN<br>surrounded-trees:AGENT |
| 422                    |   | rock,blue,landscape<br>arizona,sunset,clouds<br>desert,utah,mountains<br>landscape,mountains,mountain<br>rocks,blue,mountains | rocks-red:AMOD<br>root-rocks:ROOT<br>canyon-grand:AMOD<br>mountain-table:NN<br>root-formation:ROOT<br>view-rock:PREP_OF<br>formations-rock:NSUBJ<br>formations-rock:NN<br>crater-the:DET<br>formation-rock:NN<br>desert-the:DET<br>mountain-rock:NN<br>springs-colorado:NN<br>rocks-the:DET<br>rocks-black:AMOD           |
| 423                    |  | trip,summer,people<br>business,men,meeting<br>scotland,architecture,festival<br>joy,smile,portrait<br>politics,people,news    | book-new:AMOD<br>shop-book:NN<br>market-place:NN<br>train-sky:NN<br>playing-guitar:DOBJ<br>shirt-an:DET<br>root-student:ROOT<br>bar-a:DET<br>lobby-the:DET<br>girl-bar:PREP_IN<br>hats-the:DET<br>best-seats:DEP<br>store-book:NN<br>place-pizza:NN<br>computer-a:DET                                                     |
| Continued on next page |                                                                                     |                                                                                                                               |                                                                                                                                                                                                                                                                                                                           |

**Table1 – continued from previous page**

| Index                  | Image                                                                               | NUS-WIDE Concepts                                                                                                                    | SBU Concepts                                                                                                                                                                                                                                                                                                                                            |
|------------------------|-------------------------------------------------------------------------------------|--------------------------------------------------------------------------------------------------------------------------------------|---------------------------------------------------------------------------------------------------------------------------------------------------------------------------------------------------------------------------------------------------------------------------------------------------------------------------------------------------------|
| 424                    |    | building,church,europe<br>tourist,temple,portugal<br>historical,architecture,house<br>heritage,trip,church<br>europa,city,church     | building-random:AMOD<br>root-palace:ROOT<br>stone-white:AMOD<br>church-catholic:AMOD<br>courthouse-county:NN<br>house-building:DEP<br>house-court:NN<br>houses-building:NSUBJ<br>building-historic:AMOD<br>root-facade:ROOT<br>house-victorian:AMOD<br>buildings-many:AMOD<br>building-interesting:AMOD<br>building-oldest:AMOD<br>looks-building:NSUBJ |
| 425                    |   | restaurant,street,people<br>night,street,traffic<br>shopping,bazaar,japan<br>bazaar,city,lights<br>signs,asia,japan                  | display-window:NN<br>root-bar:ROOT<br>square-times:NN<br>bar-little:AMOD<br>window-shop:PREP_OF<br>train-sky:NN<br>market-place:NN<br>display-the:DET<br>town-china:NN<br>waterfront-the:DET<br>shirt-orange:AMOD<br>root-books:ROOT<br>reflected-window:PREP_IN<br>station-bus:NN<br>window-bar:PREP_OF                                                |
| 426                    |  | news,police,protest<br>boston,construction,urban<br>washington,seattle,art<br>ohio,state,university<br>basket,basketball,cheerleader | basket-bike:NN<br>crossing-bridge:DOBJ<br>walking-bridge:PREP_OVER<br>trees-plant:NN<br>cage-the:DET<br>bottles-water:NN<br>crossing-river:PREP_OVER<br>site-building:NN<br>fence-wire:NN<br>system-water:NN<br>bike-road:NN<br>event-the:DET<br>ride-to:AUX<br>fence-a:DET<br>dog-basket:PREP_IN                                                       |
| Continued on next page |                                                                                     |                                                                                                                                      |                                                                                                                                                                                                                                                                                                                                                         |

Table1 – continued from previous page

| Index | Image                                                                               | NUS-WIDE Concepts                                                                                                              | SBU Concepts                                                                                                                                                                                                                                                                                                                                                                  |
|-------|-------------------------------------------------------------------------------------|--------------------------------------------------------------------------------------------------------------------------------|-------------------------------------------------------------------------------------------------------------------------------------------------------------------------------------------------------------------------------------------------------------------------------------------------------------------------------------------------------------------------------|
| 427   |    | concert,cheering,metal suits,night,vintage graffiti,city,architecture commercials,urban,street coffee,city,shop                | sign-background:PREP_IN<br>streets-the:DET<br>root-band:ROOT<br>people-standing:VMOD<br>screen-tv:NN<br>truck-a:DET<br>store-shoe:NN<br>people-the:DET<br>shop-flower:NN<br>root-people:ROOT<br>sign-the:DET<br>screen-big:AMOD<br>fire-house:NN<br>sign-white:AMOD<br>says-sign:NSUBJ                                                                                        |
| 428   |   | tower,skyscraper,office buildings,building,travel cool,california,building architecture,glass,abstract concrete,building,glass | tower-glass:NN<br>building-glass:NN<br>reflection-tower:PREP_OF<br>building-modern:AMOD<br>looks-building:NSUBJ<br>buildings-office:NN<br>towers-one:NSUBJ<br>building-<br>construction:PREP_UNDER<br>office-building:VMOD<br>reflected-glass:PREP_IN<br>building-city:NN<br>building-blue:AMOD<br>building-london:PREP_IN<br>root-towers:ROOT<br>building-street:PREP_ACROSS |
| 429   |  | truck,sky,clouds tollbooth,illinois,chicago flight,plane,aviation windows,people,clouds germany,city,church                    | trucks-the:DET<br>live-building:PREP_IN<br>building-pink:AMOD<br>one-roads:PREP_OF<br>street-house:PREP_NEAR<br>race-the:DET<br>truck-red:AMOD<br>beach-miami:NN<br>root-cars:ROOT<br>station-bus:NN<br>trailer-a:DET<br>car-red:AMOD<br>truck-white:AMOD<br>space-a:DET<br>root-trucks:ROOT                                                                                  |

Continued on next page



Table1 – continued from previous page

| Index                  | Image                                                                               | NUS-WIDE Concepts                                                                                                          | SBU Concepts                                                                                                                                                                                                                                                                                                                      |
|------------------------|-------------------------------------------------------------------------------------|----------------------------------------------------------------------------------------------------------------------------|-----------------------------------------------------------------------------------------------------------------------------------------------------------------------------------------------------------------------------------------------------------------------------------------------------------------------------------|
| 430                    |    | shops,urban,japan<br>maryland,architecture,buildings<br>field,cow,park<br>road,city,people<br>flight,plane,aviation        | house-neighborhood:PREP_IN<br>street-main:NN<br>house-car:CONJ_AND<br>beach-house:DEP<br>tour-bike:NN<br>house-beach:PREP_IN<br>bike-front:PREP_IN<br>office-building:DEP<br>houses-many:AMOD<br>houses-little:AMOD<br>house-beach:PREP_ON<br>ride-bus:NN<br>road-beach:NN<br>house-in:PREP<br>mall-shopping:NN                   |
| 431                    |   | window,door,wall<br>paintings,birds,paint<br>portugal>window,monastery<br>church,interior,gothic<br>heritage,city,building | window-church:NN<br>one-doors:PREP_OF<br>glass-stained:AMOD<br>window-church:PREP_AT<br>window-building:PREP_ON<br>window-door:PREP_ABOVE<br>street-main:NN<br>window-old:AMOD<br>root-custom:ROOT<br>window-one:PREP_IN<br>window-an:DET<br>glass-stained:NN<br>stain-window:DEP<br>glass-windows:PREP_IN<br>church-baptist:NN   |
| 432                    |  | lake,mountains,mountain<br>mountains,trees,water<br>glacier,water,mountain<br>valley,snow,blue<br>mountain,lake,green      | lake-mountains:PREP_IN<br>view-lake:PREP_OF<br>root-lake:ROOT<br>lake-mountain:NN<br>lake-beautiful:AMOD<br>lake-water:NN<br>lake-a:DET<br>view-beautiful:AMOD<br>lake-green:AMOD<br>view-mountains:PREP_OF<br>road-winding:AMOD<br>lake-artificial:AMOD<br>lake-middle:PREP_IN<br>lake-mountains:CONJ_AND<br>color-water:PREP_OF |
| Continued on next page |                                                                                     |                                                                                                                            |                                                                                                                                                                                                                                                                                                                                   |

**Table1 – continued from previous page**

| Index | Image                                                                               | NUS-WIDE Concepts                                                                                                  | SBU Concepts                                                                                                                                                                                                                                                                                                  |
|-------|-------------------------------------------------------------------------------------|--------------------------------------------------------------------------------------------------------------------|---------------------------------------------------------------------------------------------------------------------------------------------------------------------------------------------------------------------------------------------------------------------------------------------------------------|
| 433   |    | ocean,waves,coast<br>glacier,alaska,iceland<br>arctic,ocean,blue<br>mist,mountains,clouds<br>marine,soldier,mammal | mountain-table:NN<br>feet-:NUM<br>sea-blue:AMOD<br>root-mountain:ROOT<br>alps-the:DET<br>mountain-highest:AMOD<br>coast-island:PREP_OF<br>waters-blue:AMOD<br>lagoon-blue:AMOD<br>islands-the:DET<br>town-cape:NN<br>volcano-the:DET<br>coast-east:AMOD<br>view-clear:AMOD<br>coast-pacific:NN                |
| 434   |   | golf,spain,flag<br>green,sky,clouds<br>hill,italy,italia<br>war,ship,history<br>countryside,clouds,green           | tree-middle:PREP_IN<br>clock-flower:NN<br>trees-olive:AMOD<br>field-the:DET<br>court-ball:NN<br>pasture-horse:NN<br>community-the:DET<br>field-soccer:NN<br>field-big:AMOD<br>tree-one:NUM<br>country-the:DET<br>fields-green:AMOD<br>field-front:PREP_IN<br>standing-tree:PREP_UNDER<br>lone-tree:DEP        |
| 435   |  | room,design,home<br>modern,interior,furniture<br>guest,room,cat<br>interior,furniture,house<br>carpet,room,chair   | bed-bedroom:PREP_IN<br>bedroom-house:PREP_IN<br>root-bedroom:ROOT<br>bedroom-master:NN<br>bed-queen:NN<br>root-room:ROOT<br>bedroom-the:DET<br>bed-size:NN<br>room-kitchen:CONJ_AND<br>root-guest:ROOT<br>has-bedroom:NSUBJ<br>bed-room:PREP_IN<br>living-room:DOBJ<br>bedroom-a:DET<br>bedroom-house:PREP_OF |

Continued on next page

Table1 – continued from previous page

| Index | Image                                                                               | NUS-WIDE Concepts                                                                                                            | SBU Concepts                                                                                                                                                                                                                                                                                                         |
|-------|-------------------------------------------------------------------------------------|------------------------------------------------------------------------------------------------------------------------------|----------------------------------------------------------------------------------------------------------------------------------------------------------------------------------------------------------------------------------------------------------------------------------------------------------------------|
| 436   |    | kiss,couple,love<br>tourist,vacation,city<br>sidewalk,people,woman<br>track,sports,boston<br>plaza,street,white              | children-the:DET<br>root-pig:ROOT<br>shot-street:NN<br>pants-the:DET<br>walking-street:PREP_ON<br>chairs-the:DET<br>root-stand:ROOT<br>in-front:POBJ<br>shrine-the:DET<br>girl-dog:CONJ_AND<br>temple-the:DET<br>cage-the:DET<br>site-construction:NN<br>root-dance:ROOT<br>best-seat:DEP                            |
| 437   |   | work,office,apple<br>meeting,office,war<br>trip,summer,people<br>news,police,protest<br>classroom,california,apple           | desk-a:DET<br>root-students:ROOT<br>sitting-desk:PREP_AT<br>bags-plastic:AMOD<br>tables-the:DET<br>lab-computer:NN<br>desk-office:PREP_IN<br>root-team:ROOT<br>office-the:DET<br>root-student:ROOT<br>computer-a:DET<br>in-office:POBJ<br>lab-the:DET<br>kitchen-house:NN<br>ride-the:DET                            |
| 438   |  | castle,water,scotland<br>tower,landscape,river<br>heritage,trip,church<br>castle,architecture,europe<br>greece,church,square | castle-the:DET<br>castle-hill:PREP_ON<br>view-castle:PREP_OF<br>root-castle:ROOT<br>castle-sky:PREP_IN<br>castle-old:AMOD<br>view-castle:PREP_FROM<br>walls-castle:NN<br>tower-castle:NN<br>hillside-the:DET<br>built-century:PREP_IN<br>side-mountain:NN<br>castle-an:DET<br>middle-photo:PREP_OF<br>hill-castle:NN |

Continued on next page

**Table1 – continued from previous page**

| Index                  | Image                                                                               | NUS-WIDE Concepts                                                                                                                | SBU Concepts                                                                                                                                                                                                                                                                                          |
|------------------------|-------------------------------------------------------------------------------------|----------------------------------------------------------------------------------------------------------------------------------|-------------------------------------------------------------------------------------------------------------------------------------------------------------------------------------------------------------------------------------------------------------------------------------------------------|
| 439                    |    | airforce,museum,flag<br>camera,lens,city<br>italy,pet,nature<br>court,building,explore<br>factory,italy,italia                   | root-machine:ROOT<br>tower-clock:NN<br>center-city:NN<br>tanks-water:NN<br>position-the:DET<br>corner-the:DET<br>truck-a:DET<br>houses-building:NSUBJ<br>street-side:NN<br>street-back:AMOD<br>car-background:PREP_IN<br>root-strange:ROOT<br>trucks-the:DET<br>city-a:DET<br>century-17th:AMOD       |
| 440                    |   | chairs,interior,office<br>furniture,chairs,retro<br>cottage,vintage,pink<br>restaurant,street,people<br>interior,furniture,house | table-chairs:CONJ_AND<br>chairs-the:DET<br>tables-chairs:CONJ_AND<br>root-tables:ROOT<br>root-chairs:ROOT<br>space-the:DET<br>table-room:NN<br>tables-the:DET<br>table-house:PREP_IN<br>area-kitchen:NN<br>floor-new:AMOD<br>style-the:DET<br>home-a:DET<br>sliding-door:DOBJ<br>root-downstairs:ROOT |
| 441                    |  | airforce,vietnam,navy<br>mosques,pakistan,mountains<br>army,iraq,kuwait<br>kids,people,water<br>path,winter,water                | root-animals:ROOT<br>group-a:DET<br>root-rest:ROOT<br>root-group:ROOT<br>bridge-small:AMOD<br>person-one:NUM<br>root-bill:ROOT<br>root-stay:ROOT<br>biking-mountain:NN<br>standing-'re:AUX<br>fork-the:DET<br>shirt-yellow:AMOD<br>hike-the:DET<br>root-girls:ROOT<br>shrine-the:DET                  |
| Continued on next page |                                                                                     |                                                                                                                                  |                                                                                                                                                                                                                                                                                                       |



**Table1 – continued from previous page**

| Index                  | Image                                                                               | NUS-WIDE Concepts                                                                                                                               | SBU Concepts                                                                                                                                                                                                                                                                                                       |
|------------------------|-------------------------------------------------------------------------------------|-------------------------------------------------------------------------------------------------------------------------------------------------|--------------------------------------------------------------------------------------------------------------------------------------------------------------------------------------------------------------------------------------------------------------------------------------------------------------------|
| 442                    |    | design,interior,furniture<br>library,explore,interestingness<br>mall,shop,ontario<br>classroom,california,apple<br>kitchen,interior,design      | area-bar:NN<br>shelves-the:DET<br>tables-the:DET<br>kitchen-house:PREP_IN<br>room-floor:PREP_ON<br>root-bar:ROOT<br>root-lounge:ROOT<br>root-kitchen:ROOT<br>view-kitchen:PREP_OF<br>style-door:NN<br>created-style:PREP_WITH<br>plan-floor:NN<br>tables-chairs:CONJ_AND<br>floor-fourth:AMOD<br>area-floor:NN     |
| 443                    |   | temple,heritage,thailand<br>house,architecture,historic<br>lawn,house,architecture<br>maryland,architecture,buildings<br>building,church,europe | root-temple:ROOT<br>building-church:NN<br>building-oldest:AMOD<br>house-traditional:AMOD<br>view-house:PREP_OF<br>house-roof:NN<br>building-capital:NN<br>house-garden:PREP_IN<br>cute-house:DOBJ<br>house-glass:NN<br>building-in:PREP<br>house-little:AMOD<br>house-cute:AMOD<br>church-stone:NN<br>city-salt:NN |
| 444                    |  | landscape,field,green<br>countryside,clouds,green<br>hill,italy,italia<br>field,clouds,blue<br>fields,scotland,blue                             | root-field:ROOT<br>field-paddy:AMOD<br>field-rice:NN<br>field-corn:NN<br>farm-a:DET<br>field-green:AMOD<br>middle-field:PREP_OF<br>field-front:PREP_IN<br>fields-the:DET<br>field-cow:NN<br>root-rice:ROOT<br>field-grass:NN<br>field-beautiful:AMOD<br>field-wheat:NN<br>field-open:AMOD                          |
| Continued on next page |                                                                                     |                                                                                                                                                 |                                                                                                                                                                                                                                                                                                                    |

Table1 – continued from previous page

| Index                  | Image                                                                               | NUS-WIDE Concepts                                                                                                         | SBU Concepts                                                                                                                                                                                                                                                                                             |
|------------------------|-------------------------------------------------------------------------------------|---------------------------------------------------------------------------------------------------------------------------|----------------------------------------------------------------------------------------------------------------------------------------------------------------------------------------------------------------------------------------------------------------------------------------------------------|
| 445                    |    | human,school,photo<br>relief,people,girl<br>peace,love,portrait<br>wolf,red,fox<br>prison,orange,woman                    | root-team:ROOT<br>girl-white:AMOD<br>girls-the:DET<br>game-the:DET<br>retriever-golden:AMOD<br>dog-brown:AMOD<br>shirt-gray:AMOD<br>riding-horse:DOBJ<br>girls-two:NUM<br>dog-cute:AMOD<br>dude-the:DET<br>man-sitting:VMOD<br>root-dogs:ROOT<br>jacket-black:AMOD<br>action-the:DET                     |
| 446                    |   | elk,deer,moose<br>oilfield,kuwait,california<br>caribou,arctic,water<br>fields,yellow,countryside<br>rice,landscape,field | country-hunt:PREP_NEAR<br>country-hill:NN<br>field-an:DET<br>field-house:PREP_BEHIND<br>root-flood:ROOT<br>birds-water:NN<br>body-water:PREP_OF<br>wire-barbed:AMOD<br>birds-little:AMOD<br>flock-birds:PREP_OF<br>river-snake:NN<br>ramp-boat:NN<br>field-corn:NN<br>river-red:AMOD<br>bridge-old:AMOD  |
| 447                    |  | ancient,pyramid,egypt<br>heritage,trip,church<br>abandoned,house,rural<br>greece,church,square<br>war,ship,history        | castle-old:AMOD<br>century-the:DET<br>hill-the:DET<br>tower-castle:PREP_IN<br>fort-the:DET<br>building-oldest:AMOD<br>century-17th:AMOD<br>monument-national:AMOD<br>houses-built:VMOD<br>house-stone:NN<br>house-tower:NN<br>stone-red:AMOD<br>castle-a:DET<br>house-large:AMOD<br>tower-castle:PREP_OF |
| Continued on next page |                                                                                     |                                                                                                                           |                                                                                                                                                                                                                                                                                                          |

**Table1 – continued from previous page**

| Index                  | Image                                                                               | NUS-WIDE Concepts                                                                                                                         | SBU Concepts                                                                                                                                                                                                                                                                                                                                        |
|------------------------|-------------------------------------------------------------------------------------|-------------------------------------------------------------------------------------------------------------------------------------------|-----------------------------------------------------------------------------------------------------------------------------------------------------------------------------------------------------------------------------------------------------------------------------------------------------------------------------------------------------|
| 448                    |    | trees,leaves,autumn<br>forest,wood,light<br>woods,leaves,path<br>moss,trees,tree<br>trunk,tree,green                                      | trunks-tree:NN<br>trees-forest:PREP_IN<br>forest-pine:AMOD<br>root-trees:ROOT<br>trees-pine:AMOD<br>forest-tree:NN<br>forest-trees:PREP_OF<br>fence-wooden:AMOD<br>forest-a:DET<br>stand-trees:PREP_OF<br>trees-tall:AMOD<br>fence-old:AMOD<br>trees-birch:AMOD<br>row-trees:PREP_OF<br>forest-the:DET                                              |
| 449                    |   | architecture,buildings,night<br>lawn,house,architecture<br>tower,landscape,river<br>trip,architecture,tourism<br>deutschland,night,church | campus-the:DET<br>house-building:DEP<br>building-one:NUM<br>root-palace:ROOT<br>building-large:AMOD<br>building-interesting:AMOD<br>castle-old:AMOD<br>building-dc:PREP_IN<br>house-white:AMOD<br>looks-building:NSUBJ<br>building-background:PREP_IN<br>abbey-the:DET<br>house-hill:PREP_ON<br>framed-trees:PREP_BY<br>cool-house:DOBJ             |
| 450                    |  | roadblock,truck,belgium<br>soldiers,beach,vintage<br>golf,spain,flag<br>truck,sky,clouds<br>roadblock,protest,london                      | road-house:PREP_OF<br>road-front:PREP_IN<br>street-front:PREP_IN<br>road-house:PREP_IN_FRONT_OF<br>street-house:PREP_OF<br>middle-road:PREP_OF<br>tree-road:PREP_IN<br>driveway-the:DET<br>street-house:PREP_IN_FRONT_OF<br>root-street:ROOT<br>road-house:PREP_NEAR<br>street-the:DET<br>front-house:PREP_OF<br>down-street:POBJ<br>root-road:ROOT |
| Continued on next page |                                                                                     |                                                                                                                                           |                                                                                                                                                                                                                                                                                                                                                     |

Table1 – continued from previous page

| Index                  | Image                                                                               | NUS-WIDE Concepts                                                                                                                           | SBU Concepts                                                                                                                                                                                                                                                                                                              |
|------------------------|-------------------------------------------------------------------------------------|---------------------------------------------------------------------------------------------------------------------------------------------|---------------------------------------------------------------------------------------------------------------------------------------------------------------------------------------------------------------------------------------------------------------------------------------------------------------------------|
| 451                    |    | design,interior,furniture<br>home,interior,design<br>interior,furniture,house<br>room,design,home<br>kitchen,interior,design                | room-living:AMOD<br>space-the:DET<br>looks-window:NSUBJ<br>fireplace-the:DET<br>room-house:PREP_IN<br>root-upstairs:ROOT<br>root-room:ROOT<br>area-floor:NN<br>room-front:AMOD<br>door-looking:VMOD<br>room-living:NN<br>tree-office:PREP_IN<br>leads-door:NSUBJ<br>room-dining:NN<br>room-guest:NN                       |
| 452                    |   | islam,asia,people<br>gardens,trees,natural<br>tourist,temple,portugal<br>mosques,asia,islam<br>religion,islam,sky                           | root-castle:ROOT<br>building-statue:DEP<br>statue-the:DET<br>wall-city:NN<br>tower-white:AMOD<br>building-built:VMOD<br>building-largest:AMOD<br>castle-an:DET<br>tower-london:PREP_OF<br>century-the:DET<br>standing-middle:PREP_IN<br>statue-buddha:PREP_OF<br>root-square:ROOT<br>arches-the:DET<br>building-every:DET |
| 453                    |  | maryland,architecture,buildings<br>apartments,pool,swimming<br>downtown,building,blue<br>modern,skyscraper,buildings<br>windows,house,green | building-black:AMOD<br>view-street:NN<br>sign-white:AMOD<br>root-buildings:ROOT<br>building-new:NN<br>building-one:NUM<br>root-home:ROOT<br>root-office:ROOT<br>apartments-the:DET<br>building-street:PREP_ACROSS<br>building-blue:AMOD<br>floor-top:AMOD<br>floor-4th:AMOD<br>root-floor:ROOT<br>building-office:NN      |
| Continued on next page |                                                                                     |                                                                                                                                             |                                                                                                                                                                                                                                                                                                                           |



**Table1 – continued from previous page**

| Index                  | Image                                                                               | NUS-WIDE Concepts                                                                                                                     | SBU Concepts                                                                                                                                                                                                                                                                                                                                              |
|------------------------|-------------------------------------------------------------------------------------|---------------------------------------------------------------------------------------------------------------------------------------|-----------------------------------------------------------------------------------------------------------------------------------------------------------------------------------------------------------------------------------------------------------------------------------------------------------------------------------------------------------|
| 454                    |    | hotel,night,lights<br>downtown,building,blue<br>cars,urban,buildings<br>buildings,building,travel<br>texas,high,metro                 | building-tall:AMOD<br>tower-building:DEP<br>building-black:AMOD<br>building-building:NSUBJ<br>building-highest:AMOD<br>towers-office:NN<br>building-middle:PREP_IN<br>building-front:PREP_IN<br>tower-glass:NN<br>building-new:NN<br>building-cool:AMOD<br>downtown-the:DET<br>building-distance:PREP_IN<br>office-building:DEP<br>building-government:NN |
| 455                    |   | boats,reflections,reflection<br>waterways,marsh,landscape<br>pool,apartments,architecture<br>lake,trees,boat<br>castle,water,scotland | view-river:PREP_OF<br>made-lake:DOBJ<br>looking-river:PREP_OVER<br>one-house:NSUBJ<br>overlooking-lake:DOBJ<br>surrounded-water:AGENT<br>view-of:PREP<br>river-background:PREP_IN<br>building-distance:PREP_IN<br>view-scenic:AMOD<br>castle-old:AMOD<br>by-river:POBJ<br>building-white:AMOD<br>root-home:ROOT<br>mill-paper:NN                          |
| 456                    |  | work,office,apple<br>morning,people,coffee<br>museum,history,war<br>officers,cars,car<br>subway,people,graffiti                       | class-the:DET<br>bar-little:AMOD<br>standing-front:PREP_IN<br>room-green:AMOD<br>wall-back:AMOD<br>office-box:NN<br>one-shirt:PREP_IN<br>house-open:AMOD<br>shirt-the:DET<br>shirt-brown:AMOD<br>root-team:ROOT<br>shirt-blue:AMOD<br>video-the:DET<br>waiting-line:PREP_IN<br>boys-kitchen:PREP_IN                                                       |
| Continued on next page |                                                                                     |                                                                                                                                       |                                                                                                                                                                                                                                                                                                                                                           |

Table1 – continued from previous page

| Index | Image                                                                               | NUS-WIDE Concepts                                                                                                            | SBU Concepts                                                                                                                                                                                                                                                                                                    |
|-------|-------------------------------------------------------------------------------------|------------------------------------------------------------------------------------------------------------------------------|-----------------------------------------------------------------------------------------------------------------------------------------------------------------------------------------------------------------------------------------------------------------------------------------------------------------|
| 457   |    | design,interior,furniture<br>kitchen,interior,design<br>interior,furniture,house<br>room,design,home<br>home,interior,design | kitchen-a:DET<br>kitchen-house:PREP_IN<br>kitchen-new:AMOD<br>doors-cabinet:NN<br>kitchen-house:PREP_OF<br>view-kitchen:PREP_OF<br>root-kitchen:ROOT<br>kitchen-old:AMOD<br>kitchen-house:NN<br>root-counter:ROOT<br>room-new:AMOD<br>kitchen-sink:DEP<br>kitchen-the:DET<br>in-kitchen:POBJ<br>room-laundry:NN |
| 458   |   | prison,orange,woman<br>suits,girls,beach<br>scientists,science,art<br>nighttime,building,evening<br>singing,kids,man         | dressed-black:PREP_IN<br>guy-a:DET<br>root-suite:ROOT<br>standing-around:PRT<br>root-guitar:ROOT<br>girl-bar:PREP_IN<br>dress-black:PREP_IN<br>bar-the:DET<br>dress-black:AMOD<br>floor-dance:NN<br>shirt-black:AMOD<br>box-black:AMOD<br>root-seats:ROOT<br>standing-front:PREP_IN<br>bar-a:DET                |
| 459   |  | agent,car,design<br>austin,motorcycle,police<br>driver,cars,auto<br>formula,classic,sport<br>bridge,ship,car                 | cars-two:NUM<br>root-cars:ROOT<br>car-street:PREP_ON<br>cars-many:AMOD<br>car-street:PREP_IN<br>wheel-the:DET<br>car-a:DET<br>car-black:AMOD<br>car-street:NN<br>car-old:AMOD<br>has-car:NSUBJ<br>root-car:ROOT<br>traffic-the:DET<br>machine-green:AMOD<br>front-car:PREP_OF                                   |

Continued on next page

Table1 – continued from previous page

| Index                  | Image                                                                               | NUS-WIDE Concepts                                                                                                             | SBU Concepts                                                                                                                                                                                                                                                                                                          |
|------------------------|-------------------------------------------------------------------------------------|-------------------------------------------------------------------------------------------------------------------------------|-----------------------------------------------------------------------------------------------------------------------------------------------------------------------------------------------------------------------------------------------------------------------------------------------------------------------|
| 460                    |    | mountain,snow,winter<br>mountains,winter,mountain<br>switzerland,snow,mountains<br>skiing,ice,blue<br>winter,canada,landscape | rocks-white:AMOD<br>valley-death:NN<br>crater-the:DET<br>summit-the:DET<br>lagoon-blue:AMOD<br>mountain-rock:NN<br>pass-mountain:NN<br>stuff-white:AMOD<br>feet-:NUM<br>road-mountain:PREP_OVER<br>hole-rock:PREP_IN<br>beach-pebble:AMOD<br>side-mountain:NN<br>mountain-the:DET<br>sands-white:AMOD                 |
| 461                    |   | spring,trees,landscape<br>field,flowers,yellow<br>flowers,spring,landscape<br>tulip,color,orange<br>trees,mountains,clouds    | red-green:CONJ_AND<br>root-field:ROOT<br>root-colorful:ROOT<br>tulips-red:AMOD<br>trees-colorful:AMOD<br>orange-yellow:CONJ_AND<br>flowers-bright:AMOD<br>flower-bed:DEP<br>clock-flower:NN<br>farm-a:DET<br>grass-trees:CONJ_AND<br>colors-the:DET<br>root-flowers:ROOT<br>green-red:CONJ_AND<br>red-orange:CONJ_AND |
| 462                    |  | cheerleader,football,girls<br>baseball,night,sunset<br>people,city,night<br>cheering,concert,city<br>uniform,world,historic   | root-square:ROOT<br>root-crowd:ROOT<br>root-temple:ROOT<br>structure-wooden:AMOD<br>court-ball:NN<br>town-beach:NN<br>best-seats:DEP<br>field-football:NN<br>queen-the:DET<br>square-main:AMOD<br>house-field:NN<br>kid-shirt:PREP_IN<br>root-palace:ROOT<br>standing-the:DET<br>people-the:DET                       |
| Continued on next page |                                                                                     |                                                                                                                               |                                                                                                                                                                                                                                                                                                                       |

Table1 – continued from previous page

| Index                  | Image                                                                               | NUS-WIDE Concepts                                                                                                                 | SBU Concepts                                                                                                                                                                                                                                                                                                      |
|------------------------|-------------------------------------------------------------------------------------|-----------------------------------------------------------------------------------------------------------------------------------|-------------------------------------------------------------------------------------------------------------------------------------------------------------------------------------------------------------------------------------------------------------------------------------------------------------------|
| 463                    |    | design,interior,furniture<br>interior,furniture,house<br>modern,interior,furniture<br>kitchen,interior,design<br>room,design,home | door-looking:VMOD<br>root-bedroom:ROOT<br>house-bedroom:AMOD<br>room-kitchen:CONJ_AND<br>window-big:AMOD<br>living-room:DOBJ<br>looking-room:PREP_INTO<br>room-family:NN<br>root-room:ROOT<br>room-guest:NN<br>wall-one:NUM<br>root-downstairs:ROOT<br>bedroom-guest:NN<br>root-upstairs:ROOT<br>room-living:AMOD |
| 464                    |   | close,park,field<br>chair,white,color<br>school,architecture,building<br>mosques,asia,islam<br>interior,furniture,house           | bed-bedroom:PREP_IN<br>root-bedroom:ROOT<br>bedroom-house:PREP_IN<br>bedroom-the:DET<br>bedroom-house:PREP_OF<br>room-house:PREP_IN<br>bedroom-master:NN<br>room-family:NN<br>bed-size:NN<br>room-living:AMOD<br>bed-queen:NN<br>stones-the:DET<br>bedroom-a:DET<br>one-rooms:PREP_OF<br>root-master:ROOT         |
| 465                    |  | polaroid,abandoned,california<br>bunny,white,pups<br>cottage,vintage,pink<br>guest,room,cat<br>rose,colors,blue                   | house-dog:NN<br>root-downstairs:ROOT<br>house-taken:VMOD<br>root-sleeps:ROOT<br>bed-bedroom:PREP_IN<br>root-bedroom:ROOT<br>one-rooms:PREP_OF<br>dog-window:PREP_IN<br>wall-west:AMOD<br>rooms-the:DET<br>has-window:DOBJ<br>doorway-a:DET<br>window-picture:NN<br>pig-guinea:NN<br>dog-house:PREP_IN             |
| Continued on next page |                                                                                     |                                                                                                                                   |                                                                                                                                                                                                                                                                                                                   |



Table1 – continued from previous page

| Index                  | Image                                                                               | NUS-WIDE Concepts                                                                                                      | SBU Concepts                                                                                                                                                                                                                                                                                                                                                            |
|------------------------|-------------------------------------------------------------------------------------|------------------------------------------------------------------------------------------------------------------------|-------------------------------------------------------------------------------------------------------------------------------------------------------------------------------------------------------------------------------------------------------------------------------------------------------------------------------------------------------------------------|
| 466                    |    | shooting,studio,playing<br>business,men,meeting<br>human,school,photo<br>oilfield,art,museum<br>subway,people,graffiti | truck-the:DET<br>sleeping-man:NN<br>root-man:ROOT<br>student-a:DET<br>root-guitar:ROOT<br>root-student:ROOT<br>guitar-a:DET<br>window-store:NN<br>shirt-the:DET<br>job-a:DET<br>guitar-the:DET<br>elevator-the:DET<br>screen-blue:AMOD<br>phone-a:DET<br>in-office:POBJ                                                                                                 |
| 467                    |   | facade,church,night<br>europa,city,church<br>tourist,temple,portugal<br>shops,urban,japan<br>tourism,europe,trip       | building-government:NN<br>building-built:VMOD<br>building-historic:AMOD<br>has-building:NSUBJ<br>building-interesting:AMOD<br>building-centre:PREP_IN<br>house-building:DEP<br>buildings-many:AMOD<br>street-shopping:NN<br>deco-art:NN<br>houses-building:NSUBJ<br>building-street:PREP_IN<br>building-middle:PREP_IN<br>quarter-french:AMOD<br>building-front:PREP_IN |
| 468                    |  | decoration,home,room<br>kitchen,interior,design<br>home,interior,design<br>guest,room,cat<br>carpet,room,chair         | root-bedroom:ROOT<br>floor-1st:AMOD<br>root-cabinet:ROOT<br>cabinet-kitchen:PREP_IN<br>looks-window:NSUBJ<br>root-kitchen:ROOT<br>bedroom-spare:AMOD<br>created-kitchen:NSUBJPASS<br>bedroom-floor:NN<br>root-downstairs:ROOT<br>shelves-the:DET<br>leads-door:NSUBJ<br>bedroom-a:DET<br>style-the:DET<br>room-kitchen:CONJ_AND                                         |
| Continued on next page |                                                                                     |                                                                                                                        |                                                                                                                                                                                                                                                                                                                                                                         |

Table1 – continued from previous page

| Index                  | Image                                                                               | NUS-WIDE Concepts                                                                                                             | SBU Concepts                                                                                                                                                                                                                                                                                                    |
|------------------------|-------------------------------------------------------------------------------------|-------------------------------------------------------------------------------------------------------------------------------|-----------------------------------------------------------------------------------------------------------------------------------------------------------------------------------------------------------------------------------------------------------------------------------------------------------------|
| 469                    |    | church,sky,building<br>religion,islam,sky<br>chapel,buildings,design<br>spain,europa,europe<br>graveyard,church,england       | church-old:AMOD<br>church-a:DET<br>building-state:NN<br>church-catholic:AMOD<br>church-stone:NN<br>capitol-state:NN<br>root-church:ROOT<br>house-state:NN<br>church-the:DET<br>building-capitol:NN<br>church-an:DET<br>towers-two:NUM<br>tower-castle:PREP_OF<br>church-little:AMOD<br>tower-bell:NN            |
| 470                    |   | flight,plane,aviation<br>asia,landscape,blue<br>airplane,clouds,sky<br>pacific,waves,nature<br>hawaii,surf,kauai              | patch-sky:PREP_OF<br>taken-black:PREP_IN<br>floor-ocean:NN<br>wave-a:DET<br>center-picture:PREP_OF<br>ocean-the:DET<br>root-white:ROOT<br>hole-rock:PREP_IN<br>rainbow-a:DET<br>clouds-gray:AMOD<br>patch-a:DET<br>looked-clouds:NSUBJ<br>covered-ice:PREP_IN<br>cloud-black:AMOD<br>sea-blue:AMOD              |
| 471                    |  | railroad,clouds,bridge<br>tracks,light,clouds<br>locomotive,bridge,track<br>railway,tracks,light<br>tracks,locomotive,station | tracks-train:NN<br>railroad-the:DET<br>train-a:DET<br>tracks-railroad:NN<br>platform-the:DET<br>tracks-train:NSUBJ<br>bridge-tracks:PREP_OVER<br>root-station:ROOT<br>line-train:NN<br>bridge-highway:PREP_OVER<br>train-the:DET<br>root-train:ROOT<br>line-the:DET<br>station-railway:NN<br>passes-train:NSUBJ |
| Continued on next page |                                                                                     |                                                                                                                               |                                                                                                                                                                                                                                                                                                                 |

Table1 – continued from previous page

| Index | Image                                                                               | NUS-WIDE Concepts                                                                                                                 | SBU Concepts                                                                                                                                                                                                                                                                                                                      |
|-------|-------------------------------------------------------------------------------------|-----------------------------------------------------------------------------------------------------------------------------------|-----------------------------------------------------------------------------------------------------------------------------------------------------------------------------------------------------------------------------------------------------------------------------------------------------------------------------------|
| 472   |    | shops,urban,japan<br>tollbooth,scotland,street<br>downtown,building,blue<br>underground,people,street<br>store,night,architecture | signs-street:NN<br>says-sign:NSUBJ<br>root-signs:ROOT<br>signs-the:DET<br>signs-old:AMOD<br>building-station:NN<br>sign-white:AMOD<br>sign-the:DET<br>sign-green:AMOD<br>door-dag:DEP<br>train-sky:NN<br>sign-bus:NN<br>sign-door:PREP_OVER<br>street-little:AMOD<br>business-a:DET                                               |
| 473   |   | morning,people,coffee<br>navy,airforce,airplane<br>glass,green,water<br>aviation,fighter,california<br>flying,california,pilot    | balcony-the:DET<br>rail-the:DET<br>floor-third:AMOD<br>camera-phone:NN<br>house-beach:NN<br>classroom-a:DET<br>root-reflection:ROOT<br>spree-river:NN<br>root-deck:ROOT<br>balcony-a:DET<br>reflections-window:PREP_IN<br>wall-window:NN<br>beach-house:DEP<br>root-theater:ROOT<br>root-balcony:ROOT                             |
| 474   |  | helicopter,aerial,hawaii<br>protest,france,protesters<br>hill,wildlife,countryside<br>world,germany,berlin<br>valley,water,river  | hike-the:DET<br>house-mountains:PREP_IN<br>ground-back:AMOD<br>bridge-rope:NN<br>view-tower:PREP_FROM<br>castle-hill:PREP_ON<br>hillside-the:DET<br>castle-sky:PREP_IN<br>side-mountain:PREP_OF<br>view-castle:PREP_FROM<br>root-town:ROOT<br>side-river:PREP_OF<br>view-castle:PREP_OF<br>man-the:DET<br>hill-background:PREP_IN |

Continued on next page

**Table1 – continued from previous page**

| Index                  | Image                                                                               | NUS-WIDE Concepts                                                                                                                         | SBU Concepts                                                                                                                                                                                                                                                                                                                  |
|------------------------|-------------------------------------------------------------------------------------|-------------------------------------------------------------------------------------------------------------------------------------------|-------------------------------------------------------------------------------------------------------------------------------------------------------------------------------------------------------------------------------------------------------------------------------------------------------------------------------|
| 475                    |    | chairs,interior,office<br>interior,furniture,house<br>restaurant,street,people<br>home,interior,design<br>design,interior,furniture       | table-chairs:CONJ_AND<br>tables-chairs:CONJ_AND<br>dining-room:DOBJ<br>chairs-the:DET<br>living-room:DOBJ<br>room-dining:NN<br>root-chairs:ROOT<br>tables-the:DET<br>table-house:PREP_IN<br>table-room:NN<br>room-house:PREP_IN<br>root-tables:ROOT<br>root-lounge:ROOT<br>chairs-two:NUM<br>room-kitchen:CONJ_AND            |
| 476                    |   | roadblock,water,tree<br>cabin,explore>window<br>oilfield,kuwait,california<br>shrine,gate,sunset<br>tanks,oil,sunset                      | fell-tree:NSUBJ<br>root-home:ROOT<br>has-house:NSUBJ<br>root-yard:ROOT<br>houses-little:AMOD<br>tree-road:PREP_IN<br>road-up:ADVMOD<br>root-house:ROOT<br>house-typical:AMOD<br>view-house:PREP_OF<br>house-house:DEP<br>house-stone:NN<br>house-neighborhood:PREP_IN<br>horse-drawn:VMOD<br>house-car:CONJ_AND               |
| 477                    |  | interior,furniture,house<br>design,interior,furniture<br>modern,interior,furniture<br>room,design,home<br>furniture,architecture,interior | root-room:ROOT<br>living-room:DOBJ<br>bedroom-house:PREP_IN<br>root-downstairs:ROOT<br>house-bedroom:AMOD<br>room-guest:NN<br>bed-bedroom:PREP_IN<br>bedroom-master:NN<br>corner-the:DET<br>room-house:PREP_IN<br>room-family:NN<br>bedroom-house:PREP_OF<br>root-bedroom:ROOT<br>room-kitchen:CONJ_AND<br>root-upstairs:ROOT |
| Continued on next page |                                                                                     |                                                                                                                                           |                                                                                                                                                                                                                                                                                                                               |



**Table1 – continued from previous page**

| Index | Image                                                                               | NUS-WIDE Concepts                                                                                                                  | SBU Concepts                                                                                                                                                                                                                                                                                                                            |
|-------|-------------------------------------------------------------------------------------|------------------------------------------------------------------------------------------------------------------------------------|-----------------------------------------------------------------------------------------------------------------------------------------------------------------------------------------------------------------------------------------------------------------------------------------------------------------------------------------|
| 478   |    | golf,spain,flag<br>uniform,world,historic<br>foals,horse,mare<br>shooting,rifles,war<br>grass,cow,field                            | field-soccer:NN<br>fields-green:AMOD<br>root-horses:ROOT<br>horses-field:PREP_IN<br>hill-a:DET<br>horses-the:DET<br>root-men:ROOT<br>standing-field:PREP_IN<br>community-the:DET<br>sheep-the:DET<br>pasture-cow:NN<br>tour-bike:NN<br>cow-the:DET<br>root-children:ROOT<br>field-small:AMOD                                            |
| 479   |   | lawn,clouds,landscape<br>golf,spain,flag<br>missouri,clouds,water<br>lawn,house,architecture<br>chicago,buildings,architecture     | house-field:NN<br>cool-house:DOBJ<br>field-football:NN<br>house-manor:NN<br>standing-<br>house:PREP_IN_FRONT_OF<br>root-trees:ROOT<br>office-main:AMOD<br>standing-tree:PREP_UNDER<br>trees-fruit:NN<br>house-trees:PREP_IN<br>house-white:AMOD<br>trees-bloom:PREP_IN<br>view-house:PREP_OF<br>trees-flowers:CONJ_AND<br>trees-two:NUM |
| 480   |  | interior,furniture,house<br>modern,interior,furniture<br>carpet,room,chair<br>decoration,home,room<br>school,architecture,building | bedroom-house:PREP_IN<br>cabinets-the:DET<br>room-family:NN<br>area-office:NN<br>root-downstairs:ROOT<br>root-bedroom:ROOT<br>leads-door:NSUBJ<br>room-bed:NN<br>area-kitchen:NN<br>wall-back:AMOD<br>floor-wood:NN<br>basement-the:DET<br>master-the:DET<br>root-master:ROOT<br>root-upstairs:ROOT                                     |

Continued on next page

Table1 – continued from previous page

| Index | Image                                                                               | NUS-WIDE Concepts                                                                                                                 | SBU Concepts                                                                                                                                                                                                                                                                                                                 |
|-------|-------------------------------------------------------------------------------------|-----------------------------------------------------------------------------------------------------------------------------------|------------------------------------------------------------------------------------------------------------------------------------------------------------------------------------------------------------------------------------------------------------------------------------------------------------------------------|
| 481   |    | war,world,army<br>news,police,protest<br>signs,asia,japan<br>life,city,street<br>protesters,photojournalism,london                | market-fish:NN<br>root-market:ROOT<br>bags-plastic:AMOD<br>bottles-the:DET<br>window-store:NN<br>town-china:NN<br>fish-market:DEP<br>market-outdoor:AMOD<br>vendor-street:NN<br>root-bags:ROOT<br>market-small:AMOD<br>market-place:NN<br>square-times:NN<br>stall-market:PREP_IN<br>market-fruit:NN                         |
| 482   |   | furniture,toys,house<br>home,interior,design<br>sewing,room,studio<br>cottage,vintage,pink<br>crafts,vintage,studio               | root-cabinet:ROOT<br>display-window:NN<br>case-the:DET<br>kitchen-a:DET<br>cabinet-kitchen:NN<br>root-frame:ROOT<br>root-display:ROOT<br>shelves-the:DET<br>display-window:PREP_IN<br>wall-kitchen:NN<br>cabinet-the:DET<br>cabinet-glass:NN<br>cabinet-kitchen:PREP_IN<br>wall-west:AMOD<br>wall-room:PREP_OF               |
| 483   |  | bathroom,abandoned,interior<br>decoration,home,room<br>bathroom,portrait,self<br>design,interior,furniture<br>paint,design,yellow | root-bathroom:ROOT<br>toilet-the:DET<br>bathroom-the:DET<br>curtain-shower:NN<br>root-shower:ROOT<br>shower-the:DET<br>bathroom-house:PREP_IN<br>bathroom-floor:NN<br>shower-bathroom:PREP_IN<br>cabinet-medicine:NN<br>heater-water:NN<br>sink-bathroom:PREP_IN<br>tub-the:DET<br>walk-when:ADVMOD<br>wall-bathroom:PREP_IN |

Continued on next page

**Table1 – continued from previous page**

| Index | Image                                                                               | NUS-WIDE Concepts                                                                                               | SBU Concepts                                                                                                                                                                                                                                                                                                                   |
|-------|-------------------------------------------------------------------------------------|-----------------------------------------------------------------------------------------------------------------|--------------------------------------------------------------------------------------------------------------------------------------------------------------------------------------------------------------------------------------------------------------------------------------------------------------------------------|
| 484   |    | buddhist,monks,burma<br>india,portrait,girl<br>youth,people,young<br>buddhism,monks,people<br>brasil,child,hope | shirt-orange:AMOD<br>root-women:ROOT<br>scene-street:NN<br>market-air:NN<br>show-the:DET<br>mai-chiang:NN<br>clothing-traditional:AMOD<br>market-outdoor:AMOD<br>woman-a:DET<br>market-night:NN<br>root-russia:ROOT<br>cute-the:DET<br>event-a:DET<br>girl-looking:VMOD<br>stall-market:NN                                     |
| 485   |   | mall,shop,ontario<br>shops,urban,japan<br>shopping,night,street<br>road,city,people<br>ontario,mall,city        | town-beach:NN<br>sign-white:AMOD<br>house-field:NN<br>root-market:ROOT<br>market-small:AMOD<br>tables-chairs:CONJ_AND<br>ship-pirate:AMOD<br>children-the:DET<br>shops-the:DET<br>house-yellow:AMOD<br>root-station:ROOT<br>houses-colorful:AMOD<br>sign-blue:AMOD<br>root-street:ROOT<br>town-small:AMOD                      |
| 486   |  | running,dog,horse<br>youth,fun,photography<br>mountains,river,lake<br>playing,beach,water<br>kids,people,water  | walking-sand:PREP_IN<br>standing-me:NSUBJ<br>field-ball:NN<br>bed-lake:NN<br>playing-ball:DOBJ<br>standing-field:PREP_IN<br>standing-wall:PREP_ON<br>walking-field:PREP_IN<br>feet-the:DET<br>playing-boy:NN<br>field-soccer:NN<br>beach-california:PREP_IN<br>boy-field:PREP_IN<br>running-beach:PREP_ON<br>enjoying-sun:DOBJ |

Continued on next page

**Table1 – continued from previous page**

| Index                  | Image                                                                               | NUS-WIDE Concepts                                                                                                         | SBU Concepts                                                                                                                                                                                                                                                                                            |
|------------------------|-------------------------------------------------------------------------------------|---------------------------------------------------------------------------------------------------------------------------|---------------------------------------------------------------------------------------------------------------------------------------------------------------------------------------------------------------------------------------------------------------------------------------------------------|
| 487                    |    | modern,interior,furniture<br>floor>window,interior<br>antenna,car,reflection<br>sitting,light,people<br>carpet,room,chair | bed-bedroom:PREP_IN<br>root-upstairs:ROOT<br>root-garage:ROOT<br>wall-white:AMOD<br>root-downstairs:ROOT<br>bed-house:PREP_IN<br>tiles-floor:NN<br>bed-size:NN<br>root-picture:ROOT<br>shape-good:AMOD<br>garage-car:NN<br>house-new:AMOD<br>fence-wire:NN<br>room-floor:PREP_ON<br>bed-room:PREP_IN    |
| 488                    |   | soldiers,beach,vintage<br>sydney,coast,people<br>submarine,ship,navy<br>pier,boat,dock<br>military,tanks,army             | race-boat:NN<br>passes-as:MARK<br>train-freight:NN<br>cruise-a:DET<br>road-beach:NN<br>passes-bridge:PREP_UNDER<br>ramp-the:DET<br>boat-river:NN<br>ferry-a:DET<br>harbor-bar:NN<br>root-passes:ROOT<br>wall-sea:NN<br>ramp-boat:NN<br>canal-ship:NN<br>bridge-river:PREP_ON                            |
| 489                    |  | forest,wood,light<br>woods,leaves,path<br>path,forest,trail<br>autumn,trees,forest<br>trees,leaves,autumn                 | forest-pine:AMOD<br>root-forest:ROOT<br>forest-a:DET<br>fence-old:AMOD<br>root-trail:ROOT<br>trees-tall:AMOD<br>forest-tree:NN<br>walking-forest:PREP_IN<br>forest-house:PREP_NEAR<br>root-path:ROOT<br>forest-the:DET<br>trees-forest:PREP_IN<br>root-fence:ROOT<br>mountains-white:AMOD<br>path-a:DET |
| Continued on next page |                                                                                     |                                                                                                                           |                                                                                                                                                                                                                                                                                                         |



**Table1 – continued from previous page**

| Index | Image                                                                               | NUS-WIDE Concepts                                                                                                                               | SBU Concepts                                                                                                                                                                                                                                                                                                                |
|-------|-------------------------------------------------------------------------------------|-------------------------------------------------------------------------------------------------------------------------------------------------|-----------------------------------------------------------------------------------------------------------------------------------------------------------------------------------------------------------------------------------------------------------------------------------------------------------------------------|
| 490   |    | work,office,apple<br>mac,office,photography<br>apple,office,mac<br>office,apple,mac<br>home,interior,design                                     | root-desk:ROOT<br>desk-room:PREP_IN<br>desk-office:PREP_IN<br>desk-the:DET<br>desk-a:DET<br>desk-bedroom:PREP_IN<br>desk-computer:NN<br>desk-new:AMOD<br>table-window:PREP_BY<br>desk-office:NN<br>root-room:ROOT<br>chairs-the:DET<br>root-office:ROOT<br>office-new:AMOD<br>office-home:NN                                |
| 491   |   | maryland,architecture,buildings<br>tourist,temple,portugal<br>high,architecture,urban<br>history,city,heritage<br>historical,architecture,house | looks-building:NSUBJ<br>building-church:NN<br>england-london:NN<br>structure-a:DET<br>war-the:DET<br>wheel-water:NN<br>building-historic:AMOD<br>house-victorian:AMOD<br>building-new:NN<br>view-front:AMOD<br>root-state:ROOT<br>courthouse-county:NN<br>building-square:PREP_IN<br>window-church:NN<br>end-bridge:PREP_OF |
| 492   |  | waterways,marsh,landscape<br>marsh,clouds,sky<br>natural,sea,ocean<br>cliff,blue,landscape<br>ice,lake,sunset                                   | lake-an:DET<br>root-flood:ROOT<br>bed-lake:NN<br>level-water:NN<br>river-a:DET<br>river-house:PREP_BY<br>lake-water:NN<br>level-the:DET<br>bar-sand:NN<br>dunes-sand:NN<br>water-high:AMOD<br>levels-water:NN<br>beach-small:AMOD<br>beach-little:AMOD<br>bridge-looking:VMOD                                               |

Continued on next page

**Table1 – continued from previous page**

| Index | Image                                                                               | NUS-WIDE Concepts                                                                                                           | SBU Concepts                                                                                                                                                                                                                                                                                                                        |
|-------|-------------------------------------------------------------------------------------|-----------------------------------------------------------------------------------------------------------------------------|-------------------------------------------------------------------------------------------------------------------------------------------------------------------------------------------------------------------------------------------------------------------------------------------------------------------------------------|
| 493   |    | store,food,color<br>shopping,bazaar,japan<br>shop,market,food<br>trip,summer,people<br>istanbul,bazaar,market               | stall-market:PREP_IN<br>market-outdoor:AMOD<br>market-place:NN<br>market-street:NN<br>market-night:NN<br>town-china:NN<br>market-an:DET<br>stall-market:NN<br>market-air:NN<br>market-house:PREP_NEAR<br>root-market:ROOT<br>root-food:ROOT<br>market-town:PREP_IN<br>root-display:ROOT<br>casino-the:DET                           |
| 494   |   | design,interior,furniture<br>home,interior,design<br>retro,modern,furniture<br>furniture,toys,house<br>decoration,home,room | root-bedroom:ROOT<br>kitchen-a:DET<br>room-new:AMOD<br>shopping-window:NN<br>root-room:ROOT<br>room-living:AMOD<br>room-great:AMOD<br>house-main:AMOD<br>table-side:NN<br>room-family:NN<br>style-the:DET<br>tub-hot:AMOD<br>root-lounge:ROOT<br>tables-the:DET<br>room-house:PREP_IN                                               |
| 495   |  | design,interior,furniture<br>home,interior,design<br>chair,room,office<br>interior,furniture,house<br>work,office,apple     | looking-room:PREP_INTO<br>room-living:AMOD<br>room-house:PREP_IN<br>view-kitchen:PREP_OF<br>door-looking:VMOD<br>shopping-window:NN<br>standing-door:PREP_IN<br>room-new:AMOD<br>kitchen-house:PREP_IN<br>room-kitchen:CONJ_AND<br>living-room:DOBJ<br>kitchen-new:AMOD<br>room-looking:VMOD<br>corner-the:DET<br>root-kitchen:ROOT |

Continued on next page

**Table1 – continued from previous page**

| Index                  | Image                                                                               | NUS-WIDE Concepts                                                                                                                              | SBU Concepts                                                                                                                                                                                                                                                                                                                  |
|------------------------|-------------------------------------------------------------------------------------|------------------------------------------------------------------------------------------------------------------------------------------------|-------------------------------------------------------------------------------------------------------------------------------------------------------------------------------------------------------------------------------------------------------------------------------------------------------------------------------|
| 496                    |    | iceland,ice,water<br>snow,mountain,clouds<br>mountains,winter,mountain<br>mountain,snow,winter<br>glacier,sky,nature                           | snow-ground:PREP_ON<br>river-frozen:AMOD<br>snow-a:DET<br>lake-front:PREP_IN<br>harbor-bar:NN<br>river-salmon:NN<br>lagoon-blue:AMOD<br>lake-frozen:AMOD<br>see-photo:PREP_IN<br>taken-morning:PREP_IN<br>standing-while:NN<br>coast-east:NN<br>busy-sunny:APPOS<br>wave-the:DET<br>root-icy:ROOT                             |
| 497                    |   | italy,water,italians<br>bridge,bridges,architecture<br>canal,houseboat,barge<br>bridges,trees,nature<br>waterways,architecture,europe          | bridge-water:PREP_OVER<br>root-arch:ROOT<br>bridge-arch:NN<br>bridge-stone:NN<br>root-bridge:ROOT<br>bridge-oldest:AMOD<br>bridge-lake:PREP_OVER<br>arches-the:DET<br>built-bridge:NSUBJ<br>fountain-the:DET<br>crosses-bridge:NSUBJ<br>road-bridge:DEP<br>bridge-road:NN<br>bridge-foot:NN<br>bridge-over:PRT                |
| 498                    |  | restaurant,street,people<br>interior,furniture,house<br>design,interior,furniture<br>chairs,interior,office<br>furniture,architecture,interior | root-kitchen:ROOT<br>area-kitchen:NN<br>dining-room:DOBJ<br>window-new:AMOD<br>room-family:NN<br>table-kitchen:PREP_IN<br>kitchen-house:PREP_IN<br>root-lounge:ROOT<br>window-big:AMOD<br>view-room:PREP_FROM<br>house-main:AMOD<br>room-floor:PREP_ON<br>table-window:PREP_BY<br>tables-chairs:CONJ_AND<br>room-sitting:AMOD |
| Continued on next page |                                                                                     |                                                                                                                                                |                                                                                                                                                                                                                                                                                                                               |

**Table1 – continued from previous page**

| Index | Image                                                                              | NUS-WIDE Concepts                                                                                                        | SBU Concepts                                                                                                                                                                                                                                                                          |
|-------|------------------------------------------------------------------------------------|--------------------------------------------------------------------------------------------------------------------------|---------------------------------------------------------------------------------------------------------------------------------------------------------------------------------------------------------------------------------------------------------------------------------------|
| 499   |   | steam,railroad,rail<br>train,engine,steam<br>locomotive,steam,china<br>railroad,locomotive,steam<br>railway,bridge,steam | train-a:DET<br>train-steam:NN<br>biking-mountain:NN<br>van-door:DEP<br>up-mountain:POBJ<br>train-car:NN<br>trail-bike:NN<br>root-train:ROOT<br>root-passes:ROOT<br>bike-mountain:NN<br>bridge-road:NN<br>fire-a:DET<br>mountains-blue:NN<br>river-white:AMOD<br>parkway-the:DET       |
| 500   |  | golf,spain,flag<br>philippines,blue,sea<br>green,forest,trees<br>lawn,park,girl<br>shade,leaves,trees                    | water-green:AMOD<br>green-the:DET<br>green-water:NSUBJ<br>green-blue:CONJ_AND<br>pool-swimming:NN<br>pool-swimming:AMOD<br>plays-boy:NSUBJ<br>ball-the:DET<br>road-brick:NN<br>ball-a:DET<br>water-park:PREP_IN<br>bench-the:DET<br>river-green:AMOD<br>field-ball:NN<br>couple-a:DET |
