# Supplementary material
Source: ML conference proceedings conference paper supplement (https://openaccess.thecvf.com/content/cvpr_2015/html/Zhou_ConceptLearner_Discovering_Visual_2015_CVPR_paper.html)
Supplement: Supplementary file 2 [file 381_SuppB_ConceptRecognition_Pascal.pdf › 0381-supp/381_SuppB_ConceptRecognition_Pascal.pdf]

## Supplementary Material B - ConceptLearner: Discovering Visual Concepts from Weakly Labeled Image Collections

Bolei Zhou<sup>†</sup>, Vignesh Jagadeesh<sup>‡</sup>, Robinson Piramuthu<sup>‡</sup>

<sup>†</sup>MIT <sup>‡</sup>eBay Research Labs

bolei@mit.edu, [vjagadeesh, rpiramuthu]@ebay.com

In this supplementary, we show the result of concept recognition on 500 random images from Pascal VOC 2007 dataset. See Section 6.1 of the main paper for details.

Table 1: Concept recognition on 500 random images from Pascal VOC 2007. Results based on concepts learned from NUS-WIDE and SBU datasets are shown in separate columns.

| Index | Image                                                                               | NUS-WIDE Concepts                                                                                                           | SBU Concepts                                                                                                                                                                                                                                                                              |
|-------|-------------------------------------------------------------------------------------|-----------------------------------------------------------------------------------------------------------------------------|-------------------------------------------------------------------------------------------------------------------------------------------------------------------------------------------------------------------------------------------------------------------------------------------|
| 1     |   | balloons,party,fun<br>austria,great,world<br>little,girl,child<br>halloween,costume,chicago<br>style,clothes,girl           | pants-red:AMOD<br>girls-red:PREP_IN<br>dress-up:PRT<br>boy-red:PREP_IN<br>red-black:CONJ_AND<br>ride-bike:DOBJ<br>coat-red:AMOD<br>outfit-a:DET<br>dress-red:AMOD<br>red-blue:CONJ_AND<br>dress-red:PREP_IN<br>skirt-the:DET<br>hats-the:DET<br>dress-shoes:CONJ_AND<br>red-gold:CONJ_AND |
| 2     |  | vehicle,abandoned,rust<br>train,engine,steam<br>locomotive,bridge,track<br>locomotive,explore,colorado<br>auto,truck,canada | car-abandoned:AMOD<br>truck-field:PREP_IN<br>car-sitting:VMOD<br>root-truck:ROOT<br>car-old:AMOD<br>root-van:ROOT<br>truck-an:DET<br>cars-old:AMOD<br>trucks-the:DET<br>truck-old:AMOD<br>train-road:NN<br>train-car:NN<br>up-mountain:POBJ<br>root-train:ROOT<br>train-freight:NN        |

Continued on next page

Table1 – continued from previous page

| Index | Image                                                                               | NUS-WIDE Concepts                                                                                                        | SBU Concepts                                                                                                                                                                                                                                                                                          |
|-------|-------------------------------------------------------------------------------------|--------------------------------------------------------------------------------------------------------------------------|-------------------------------------------------------------------------------------------------------------------------------------------------------------------------------------------------------------------------------------------------------------------------------------------------------|
| 3     |    | mural,building,city<br>graffiti,city,architecture<br>free,art,red<br>officers,cars,car<br>host,graffiti,hotel            | art-wall:NN<br>root-art:ROOT<br>dealership-car:NN<br>root-graffiti:ROOT<br>business-a:DET<br>job-a:DET<br>mural-wall:NN<br>vintage-signs:NN<br>graffiti-wall:PREP_ON<br>building-ohio:PREP_IN<br>wall-colorful:AMOD<br>sign-glass:NN<br>wall-building:PREP_IN<br>art-street:NN<br>root-panel:ROOT     |
| 4     |   | backpack,camera,lens<br>cables,building,apple<br>flag,protest,politics<br>police,politics,peace<br>windows,people,clouds | black-red:CONJ_AND<br>city-new:NN<br>root-section:ROOT<br>detail-window:PREP_FROM<br>display-a:DET<br>root-figures:ROOT<br>root-bags:ROOT<br>window-a:DET<br>store-clothing:NN<br>glass-window:PREP_IN<br>red-black:CONJ_AND<br>store-shoe:NN<br>market-flea:NN<br>cats-black:AMOD<br>man-little:AMOD |
| 5     |  | trip,summer,people<br>design,light,red<br>morning,people,coffee<br>microphones,people,fun<br>work,travel,asia            | boy-chair:PREP_IN<br>boy-sitting:DEP<br>sit-chair:PREP_IN<br>chair-girl:NN<br>classroom-a:DET<br>boy-birthday:NN<br>chair-boy:NN<br>girl-chair:PREP_IN<br>boy-big:AMOD<br>sitting-seat:PREP_IN<br>boy-sitting:VMOD<br>playing-guitar:DOBJ<br>table-kitchen:NN<br>boy-mirror:PREP_IN<br>shirt-an:DET   |

Continued on next page

Table1 – continued from previous page

| Index                  | Image                                                                               | NUS-WIDE Concepts                                                                                                  | SBU Concepts                                                                                                                                                                                                                                                                                                |
|------------------------|-------------------------------------------------------------------------------------|--------------------------------------------------------------------------------------------------------------------|-------------------------------------------------------------------------------------------------------------------------------------------------------------------------------------------------------------------------------------------------------------------------------------------------------------|
| 6                      |    | tanks,texas,state<br>jeep,sky,blue<br>bike,sky,water<br>wall,graffiti,art<br>gun,rifles,soldiers                   | car-front:PREP_IN<br>cars-old:AMOD<br>horse-drawn:VMOD<br>truck-big:AMOD<br>truck-the:DET<br>root-trucks:ROOT<br>trucks-the:DET<br>scene-typical:AMOD<br>pictures-the:DET<br>house-car:CONJ_AND<br>trailer-a:DET<br>has-house:NSUBJ<br>bike-front:PREP_IN<br>train-little:AMOD<br>tractor-a:DET             |
| 7                      |   | apple,office,mac<br>office,apple,mac<br>mac,office,photography<br>mac,leopard,display<br>work,office,apple         | root-desk:ROOT<br>desk-office:PREP_IN<br>computer-the:DET<br>office-the:DET<br>root-computer:ROOT<br>screen-the:DET<br>keyboard-the:DET<br>desk-room:PREP_IN<br>desk-computer:NN<br>desk-new:AMOD<br>desk-the:DET<br>laptop-the:DET<br>monitor-the:DET<br>screen-blue:AMOD<br>desk-a:DET                    |
| 8                      |  | cliff,coast,cloud<br>harbor,sky,clouds<br>twilight,clouds,silhouette<br>cloud,storm,sun<br>storm,landscape,tornado | clouds-dark:AMOD<br>root-rainbow:ROOT<br>clouds-black:AMOD<br>cloud-black:AMOD<br>rainbow-sky:PREP_IN<br>root-storm:ROOT<br>sky-golden:AMOD<br>clouds-storm:NSUBJ<br>sky-lake:PREP_OVER<br>storm-a:DET<br>clouds-beach:PREP_OVER<br>sky-pink:AMOD<br>setting-sun:NSUBJ<br>sunset-over:PRT<br>sunset-the:DET |
| Continued on next page |                                                                                     |                                                                                                                    |                                                                                                                                                                                                                                                                                                             |

Table1 – continued from previous page

| Index | Image                                                                               | NUS-WIDE Concepts                                                                                                                   | SBU Concepts                                                                                                                                                                                                                                                                                             |
|-------|-------------------------------------------------------------------------------------|-------------------------------------------------------------------------------------------------------------------------------------|----------------------------------------------------------------------------------------------------------------------------------------------------------------------------------------------------------------------------------------------------------------------------------------------------------|
| 9     |    | antique,car,truck<br>vintage,car,classic<br>car,automobile,truck<br>truck,rusty,vintage<br>ladder,orange,cat                        | one-cars:PREP_OF<br>root-car:ROOT<br>truck-ford:NN<br>parked-car:NSUBJ<br>car-classic:AMOD<br>show-the:DET<br>truck-pickup:NN<br>car-vintage:AMOD<br>car-street:PREP_IN<br>root-show:ROOT<br>show-car:NSUBJ<br>window-rear:AMOD<br>parked-truck:NSUBJ<br>car-old:AMOD<br>show-a:DET                      |
| 10    |   | hats,cute,handmade<br>decoration,home,room<br>designs,male,egypt<br>december,christmas,green<br>small,big,man                       | room-living:AMOD<br>chair-pink:AMOD<br>sitting-room:PREP_IN<br>room-the:DET<br>bed-room:PREP_IN<br>fireplace-the:DET<br>root-grace:ROOT<br>girl-chair:PREP_IN<br>bedroom-the:DET<br>cats-the:DET<br>chair-house:PREP_IN<br>root-buddy:ROOT<br>chair-room:PREP_IN<br>bed-house:PREP_IN<br>root-guest:ROOT |
| 11    |  | formula,classic,sport<br>racing,driver,united<br>riot,protesters,photojournalism<br>montreal,people,protest<br>bike,motorcycle,blue | root-show:ROOT<br>mask-a:DET<br>race-a:DET<br>seat-front:AMOD<br>seat-bike:NN<br>motorcycle-a:DET<br>flag-american:AMOD<br>black-orange:CONJ_AND<br>team-the:DET<br>crowd-the:DET<br>school-high:NN<br>machine-flying:AMOD<br>show-a:DET<br>cross-street:DOBJ<br>colors-white:AMOD                       |

Continued on next page



**Table1 – continued from previous page**

| Index                  | Image                                                                               | NUS-WIDE Concepts                                                                                                        | SBU Concepts                                                                                                                                                                                                                                                                                      |
|------------------------|-------------------------------------------------------------------------------------|--------------------------------------------------------------------------------------------------------------------------|---------------------------------------------------------------------------------------------------------------------------------------------------------------------------------------------------------------------------------------------------------------------------------------------------|
| 12                     |    | fishing,fish,lake<br>birds,wings,white<br>outdoor,wildlife,animal<br>running,dog,horse<br>beach,crab,nature              | looking-food:PREP_FOR<br>standing-water:PREP_IN<br>table-bird:NN<br>heron-blue:AMOD<br>bird-a:DET<br>heron-a:DET<br>caught-bird:DOBJ<br>walking-water:PREP_IN<br>bird-water:NN<br>heron-great:AMOD<br>root-heron:ROOT<br>meal-a:DET<br>feet-the:DET<br>birds-little:AMOD<br>heron-blue:NN         |
| 13                     |   | runway,flight,aviation<br>grass,cow,field<br>landing,aviation,flying<br>arizona,vintage,urban<br>smoke,airplane,aircraft | field-soccer:NN<br>field-ball:NN<br>middle-field:PREP_OF<br>field-baseball:NN<br>field-center:NN<br>house-field:NN<br>field-big:AMOD<br>flying-kite:DOBJ<br>field-front:PREP_IN<br>greens-the:DET<br>field-cow:NN<br>track-the:DET<br>kite-a:DET<br>field-open:AMOD<br>field-an:DET               |
| 14                     |  | horses,explore,animal<br>horse,argentina,field<br>bench,people,sitting<br>horse,red,white<br>kuwait,war,iraq             | horse-a:DET<br>horses-the:DET<br>root-horses:ROOT<br>root-horse:ROOT<br>horse-the:DET<br>riding-horse:DOBJ<br>statue-massive:AMOD<br>building-statue:DEP<br>root-couple:ROOT<br>pony-a:DET<br>statue-buddha:PREP_OF<br>forest-new:NN<br>ride-bike:NN<br>standing-tree:PREP_UNDER<br>fence-the:DET |
| Continued on next page |                                                                                     |                                                                                                                          |                                                                                                                                                                                                                                                                                                   |

Table1 – continued from previous page

| Index | Image                                                                               | NUS-WIDE Concepts                                                                                                                | SBU Concepts                                                                                                                                                                                                                                                                                 |
|-------|-------------------------------------------------------------------------------------|----------------------------------------------------------------------------------------------------------------------------------|----------------------------------------------------------------------------------------------------------------------------------------------------------------------------------------------------------------------------------------------------------------------------------------------|
| 15    |    | protest,france,protesters<br>police,car,cars<br>cars,people,police<br>june,world,france<br>roadblock,protest,london              | ride-the:DET<br>buses-the:DET<br>ride-to:AUX<br>coach-the:DET<br>trucks-the:DET<br>cross-bridge:DOBJ<br>best-seats:DEP<br>waiting-line:PREP_IN<br>bus-city:NN<br>one-blue:AMOD<br>team-the:DET<br>cars-many:AMOD<br>truck-pickup:NN<br>best-seat:DEP<br>car-street:NN                        |
| 16    |   | running,dog,horse<br>rabbit,sweet,pets<br>wedding,dress,portrait<br>kitty,orange,cats<br>bunny,white,pups                        | cat-cute:AMOD<br>cat-white:AMOD<br>cat-tree:PREP_UNDER<br>grass-the:DET<br>sitting-tree:PREP_UNDER<br>house-taken:VMOD<br>dog-cute:AMOD<br>lives-cat:NSUBJ<br>cat-garden:PREP_IN<br>gardens-the:DET<br>shade-the:DET<br>cat-house:NN<br>garden-a:DET<br>root-bunny:ROOT<br>enjoying-sun:DOBJ |
| 17    |  | bus,abandoned,clouds<br>truck,tanker,massachusetts<br>vehicle,abandoned,rust<br>firefighter,truck,manhattan<br>auto,truck,canada | buses-the:DET<br>station-bus:NN<br>truck-water:NN<br>colorful-very:ADVMOD<br>train-little:AMOD<br>train-road:NN<br>coach-a:DET<br>service-the:DET<br>parked-truck:NSUBJ<br>parked-street:PREP_IN<br>truck-blue:AMOD<br>van-the:DET<br>bus-school:NN<br>rear-the:DET<br>car-railroad:NN       |

Continued on next page

**Table1 – continued from previous page**

| Index | Image                                                                               | NUS-WIDE Concepts                                                                                                         | SBU Concepts                                                                                                                                                                                                                                                                                                       |
|-------|-------------------------------------------------------------------------------------|---------------------------------------------------------------------------------------------------------------------------|--------------------------------------------------------------------------------------------------------------------------------------------------------------------------------------------------------------------------------------------------------------------------------------------------------------------|
| 18    |    | car,automobile,truck<br>rally,car,racing<br>automobile,truck,california<br>automobile,ontario,speed<br>bug,car,automobile | window-rear:AMOD<br>root-car:ROOT<br>parked-car:NSUBJ<br>one-cars:PREP_OF<br>car-street:PREP_IN<br>parked-car:NSUBJPASS<br>truck-ford:NN<br>parked-street:PREP_ON<br>car-rental:AMOD<br>parked-street:PREP_IN<br>car-road:PREP_ON<br>cars-trucks:CONJ_AND<br>car-lot:PREP_IN<br>car-old:AMOD<br>van-white:AMOD     |
| 19    |   | painting,artist,colors<br>indian,nature,underwater<br>silver,dog,dogs<br>perfect,great,art<br>vacation,fun,people         | rice-brown:AMOD<br>plants-potted:AMOD<br>peppers-red:AMOD<br>sauce-red:AMOD<br>leaf-banana:NN<br>one-green:AMOD<br>pot-clay:NN<br>onions-green:AMOD<br>plate-a:DET<br>fish-white:AMOD<br>root-lunch:ROOT<br>beans-green:AMOD<br>sauce-a:DET<br>chicken-sauce:PREP_IN<br>sauce-wine:NN                              |
| 20    |  | furniture,toys,house<br>shop,market,food<br>shops,fun,florida<br>guest,room,cat<br>cafe,bar,street                        | fish-market:DEP<br>root-display:ROOT<br>shop-shoe:NN<br>table-kitchen:PREP_IN<br>tables-the:DET<br>market-fish:NN<br>display-window:NN<br>root-market:ROOT<br>table-window:PREP_BY<br>in-market:POBJ<br>table-house:PREP_IN<br>market-biggest:AMOD<br>box-glass:NN<br>market-largest:AMOD<br>kitchen-house:PREP_IN |

Continued on next page

Table1 – continued from previous page

| Index                  | Image                                                                               | NUS-WIDE Concepts                                                                                                                                      | SBU Concepts                                                                                                                                                                                                                                                                                                                                      |
|------------------------|-------------------------------------------------------------------------------------|--------------------------------------------------------------------------------------------------------------------------------------------------------|---------------------------------------------------------------------------------------------------------------------------------------------------------------------------------------------------------------------------------------------------------------------------------------------------------------------------------------------------|
| 21                     |    | <p>pets,cat,cats<br/> wolf,dogs,ice<br/> feline,kitten,animals<br/> bears,minnesota,berlin<br/> cats,kitten,pets</p>                                   | <p>dog-box:PREP_IN<br/> bear-brown:AMOD<br/> cat-window:PREP_IN<br/> cute-very:ADVMOD<br/> cat-lives:RCMOD<br/> doggy-window:PREP_IN<br/> cub-bear:NN<br/> taking-nap:DOBJ<br/> lion-the:DET<br/> cat-house:NN<br/> cat-white:AMOD<br/> root-sleeps:ROOT<br/> dog-truck:PREP_IN<br/> cub-the:DET<br/> bears-the:DET</p>                           |
| 22                     |   | <p>hill,architecture,city<br/> mexico,vintage,america<br/> houses,water,river<br/> greece,church,square<br/> village,france,europe</p>                 | <p>root-houses:ROOT<br/> hill-the:DET<br/> side-hand:NN<br/> view-street:PREP_OF<br/> street-house:PREP_NEAR<br/> view-street:PREP_FROM<br/> root-village:ROOT<br/> hill-castle:NN<br/> one-house:NSUBJ<br/> surrounded-trees:AGENT<br/> hill-steep:AMOD<br/> lined-tree:NSUBJ<br/> side-hill:NN<br/> trees-green:AMOD<br/> looking-road:DOBJ</p> |
| 23                     |  | <p>formula,classic,sport<br/> motorcycle,texas,explore<br/> motorcycle,netherlands,nederland<br/> racing,driver,united<br/> classic,automobile,red</p> | <p>show-car:NN<br/> show-car:NSUBJ<br/> root-show:ROOT<br/> car-classic:AMOD<br/> building-d70:PREP_IN<br/> motorcycle-a:DET<br/> building-britannic:AMOD<br/> show-a:DET<br/> show-building:PREP_AT<br/> root-car:ROOT<br/> parked-street:PREP_ON<br/> bike-road:NN<br/> car-a:DET<br/> basket-bike:NN<br/> has-car:NSUBJ</p>                    |
| Continued on next page |                                                                                     |                                                                                                                                                        |                                                                                                                                                                                                                                                                                                                                                   |



Table1 – continued from previous page

| Index                  | Image                                                                               | NUS-WIDE Concepts                                                                                                     | SBU Concepts                                                                                                                                                                                                                                                                                           |
|------------------------|-------------------------------------------------------------------------------------|-----------------------------------------------------------------------------------------------------------------------|--------------------------------------------------------------------------------------------------------------------------------------------------------------------------------------------------------------------------------------------------------------------------------------------------------|
| 24                     |    | men,male,sports<br>cellphones,people,street<br>sidewalk,people,woman<br>boys,girls,kid<br>refugees,africa,boy         | root-students:ROOT<br>root-men:ROOT<br>boy-sitting:VMOD<br>shirt-white:AMOD<br>root-children:ROOT<br>women-two:NUM<br>boy-girl:CONJ_AND<br>shirt-black:AMOD<br>boy-dog:CONJ_AND<br>root-brother:ROOT<br>girl-boy:CONJ_AND<br>man-sitting:VMOD<br>house-river:NN<br>shirt-blue:AMOD<br>me-shirt:PREP_IN |
| 25                     |   | washington,seattle,art<br>book,dog,funny<br>military,soldiers,war<br>room,people,adults<br>downtown,people,street     | table-room:PREP_IN<br>laptop-a:DET<br>table-pool:NN<br>center-the:DET<br>root-pool:ROOT<br>table-bar:PREP_IN<br>box-green:AMOD<br>sit-chair:PREP_IN<br>keyboard-the:DET<br>on-floor:POBJ<br>ball-basket:NN<br>chair-lounge:NN<br>cabin-the:DET<br>chair-office:PREP_IN<br>seats-the:DET                |
| 26                     |  | car,automobile,truck<br>vehicle,cars,speed<br>automobile,truck,california<br>auto,truck,canada<br>cars,racing,classic | root-car:ROOT<br>spotted-car:NSUBJ<br>car-old:AMOD<br>car-blue:AMOD<br>parked-street:PREP_IN<br>car-new:AMOD<br>car-toy:NN<br>one-cars:PREP_OF<br>parked-car:NSUBJ<br>car-abandoned:AMOD<br>car-sitting:VMOD<br>car-a:DET<br>car-street:PREP_IN<br>car-black:AMOD<br>car-street:PREP_ON                |
| Continued on next page |                                                                                     |                                                                                                                       |                                                                                                                                                                                                                                                                                                        |

Table1 – continued from previous page

| Index | Image                                                                               | NUS-WIDE Concepts                                                                                                       | SBU Concepts                                                                                                                                                                                                                                                                                                              |
|-------|-------------------------------------------------------------------------------------|-------------------------------------------------------------------------------------------------------------------------|---------------------------------------------------------------------------------------------------------------------------------------------------------------------------------------------------------------------------------------------------------------------------------------------------------------------------|
| 27    |    | plants,trees,tree<br>garden,trees,tree<br>sculpture,toy,handmade<br>flowers,white,rose<br>plant,tree,trees              | plant-pot:PREP_IN<br>root-plant:ROOT<br>pot-a:DET<br>tree-pot:PREP_IN<br>root-pots:ROOT<br>tree-little:AMOD<br>plant-to:AUX<br>plants-tomato:NN<br>pot-big:AMOD<br>flowers-pot:PREP_IN<br>plants-pots:PREP_IN<br>root-pot:ROOT<br>pot-blue:AMOD<br>pots-flower:NN<br>plants-potted:AMOD                                   |
| 28    |   | greece,white,art<br>wedding,dress,portrait<br>fountain,people,kids<br>faces,boy,documentary<br>burma,documentary,relief | dress-white:AMOD<br>standing-girl:NN<br>black-white:CONJ_AND<br>picture-black:AMOD<br>fountains-water:NN<br>black-white:PREP_IN<br>woman-sitting:VMOD<br>fountain-water:NN<br>photo-white:AMOD<br>dress-wedding:NN<br>girl-flower:NN<br>shot-white:AMOD<br>converted-white:PREP_TO<br>root-dress:ROOT<br>photo-black:AMOD |
| 29    |  | cats,kitten,pets<br>family,love,red<br>army,guns,weapons<br>moose,dog,puppy<br>cubs,bears,cute                          | root-fits:ROOT<br>room-computer:NN<br>taking-nap:DOBJ<br>cat-bag:PREP_IN<br>nap-a:DET<br>root-buddy:ROOT<br>chair-computer:NN<br>getting-bath:DOBJ<br>likes-sit:XCOMP<br>couch-room:PREP_IN<br>bed-room:PREP_IN<br>cat-kitchen:PREP_IN<br>sitting-kitchen:PREP_IN<br>seat-best:AMOD<br>seat-house:PREP_IN                 |

Continued on next page

Table1 – continued from previous page

| Index                  | Image                                                                               | NUS-WIDE Concepts                                                                                                               | SBU Concepts                                                                                                                                                                                                                                                                                                      |
|------------------------|-------------------------------------------------------------------------------------|---------------------------------------------------------------------------------------------------------------------------------|-------------------------------------------------------------------------------------------------------------------------------------------------------------------------------------------------------------------------------------------------------------------------------------------------------------------|
| 30                     |    | party,politics,america<br>square,portrait,china<br>club,party,black<br>washington,president,protest<br>individual,person,people | me-house:PREP_IN<br>party-house:NN<br>girls-standing:DEP<br>eve-christmas:NN<br>boy-birthday:NN<br>girls-all:PREDET<br>at-bar:POBJ<br>bar-floor:NN<br>line-bathroom:PREP_FOR<br>screen-laptop:AMOD<br>glass-wine:PREP_OF<br>riding-cars:PREP_IN<br>girl-train:PREP_IN<br>picture-me:PREP_OF<br>boy-mirror:PREP_IN |
| 31                     |   | racing,classic,cars<br>race,car,auto<br>cars,racing,classic<br>classic,racing,cars<br>jeep,cars,automobile                      | plate-license:NN<br>spotted-car:NSUBJ<br>truck-ford:NN<br>hood-the:DET<br>root-car:ROOT<br>truck-blue:AMOD<br>car-little:AMOD<br>cars-many:AMOD<br>parked-street:PREP_ON<br>one-cars:PREP_OF<br>parked-street:PREP_IN<br>truck-red:AMOD<br>parked-car:NSUBJ<br>car-field:PREP_IN<br>car-street:PREP_IN            |
| 32                     |  | runway,flight,aviation<br>aircraft,wings,wing<br>airplane,clouds,sky<br>united,airplane,airport<br>british,formula,car          | plane-the:DET<br>may-collection:NN<br>flying-order:DOBJ<br>may-heritage:NN<br>highway-a:DET<br>museum-vintage:AMOD<br>museum-airplane:NN<br>root-plane:ROOT<br>scheme-white:AMOD<br>airplane-a:DET<br>car-white:AMOD<br>airplane-the:DET<br>while-car:NN<br>highway-the:DET<br>plane-a:DET                        |
| Continued on next page |                                                                                     |                                                                                                                                 |                                                                                                                                                                                                                                                                                                                   |

Table1 – continued from previous page

| Index | Image                                                                               | NUS-WIDE Concepts                                                                                                                       | SBU Concepts                                                                                                                                                                                                                                                                                                        |
|-------|-------------------------------------------------------------------------------------|-----------------------------------------------------------------------------------------------------------------------------------------|---------------------------------------------------------------------------------------------------------------------------------------------------------------------------------------------------------------------------------------------------------------------------------------------------------------------|
| 33    |    | dogs,funny,cute<br>puppy,baby,animals<br>small,animal,pet<br>play,dog,dogs<br>soft,animal,pet                                           | cats-the:DET<br>cat-bag:PREP_IN<br>root-puppy:ROOT<br>boy-bed:PREP_IN<br>root-sleeps:ROOT<br>animals-stuffed:AMOD<br>pillow-the:DET<br>root-nap:ROOT<br>cats-black:AMOD<br>puppy-cute:AMOD<br>cute-being:COP<br>root-cats:ROOT<br>nap-a:DET<br>basket-laundry:NN<br>puppy-the:DET                                   |
| 34    |   | driver,cars,auto<br>racing,classic,cars<br>engine,truck,auto<br>automobile,ontario,speed<br>vehicle,cars,speed                          | car-red:AMOD<br>parked-car:NSUBJ<br>cars-two:NUM<br>car-street:PREP_IN<br>root-cars:ROOT<br>spotted-car:NSUBJ<br>car-pink:AMOD<br>car-green:AMOD<br>root-car:ROOT<br>car-blue:AMOD<br>car-street:PREP_ON<br>truck-red:AMOD<br>one-cars:PREP_OF<br>car-parked:VMOD<br>car-little:AMOD                                |
| 35    |  | interior,furniture,house<br>design,interior,furniture<br>home,interior,design<br>studio,microphones,office<br>modern,interior,furniture | room-dining:NN<br>table-chairs:CONJ_AND<br>desk-a:DET<br>room-looking:VMOD<br>dining-room:DOBJ<br>root-desk:ROOT<br>looking-room:PREP_INTO<br>standing-kitchen:PREP_IN<br>living-room:DOBJ<br>room-kitchen:CONJ_AND<br>view-kitchen:PREP_OF<br>chairs-the:DET<br>root-room:ROOT<br>see-door:DOBJ<br>area-kitchen:NN |

Continued on next page



Table1 – continued from previous page

| Index | Image                                                                               | NUS-WIDE Concepts                                                                                                   | SBU Concepts                                                                                                                                                                                                                                                                                               |
|-------|-------------------------------------------------------------------------------------|---------------------------------------------------------------------------------------------------------------------|------------------------------------------------------------------------------------------------------------------------------------------------------------------------------------------------------------------------------------------------------------------------------------------------------------|
| 36    |    | clothes,style,red<br>monks,asia,orange<br>museum,history,war<br>pennsylvania,president,beards<br>guard,police,coast | dress-red:AMOD<br>coat-red:AMOD<br>in-front:POBJ<br>red-black:CONJ_AND<br>girl-red:PREP_IN<br>girls-red:PREP_IN<br>shirt-red:AMOD<br>pants-red:AMOD<br>skirt-the:DET<br>students-the:DET<br>root-heather:ROOT<br>lady-dress:PREP_IN<br>girl-coat:PREP_IN<br>standing-way:PREP_IN<br>dress-traditional:AMOD |
| 37    |   | display,apple,mac<br>home,interior,design<br>mac,leopard,display<br>apple,office,mac<br>antenna,car,reflection      | tv-screen:NN<br>television-a:DET<br>desk-new:AMOD<br>root-computer:ROOT<br>laptop-the:DET<br>computer-the:DET<br>desk-computer:NN<br>screen-the:DET<br>television-the:DET<br>screen-tv:NN<br>root-tank:ROOT<br>fireplace-the:DET<br>couch-room:PREP_IN<br>table-side:NN<br>root-screen:ROOT                |
| 38    |  | shadow,street,people<br>kids,people,water<br>road,city,people<br>field,cow,park<br>driver,cars,auto                 | highway-a:DET<br>station-gas:NN<br>park-car:NN<br>trucks-the:DET<br>one-blue:AMOD<br>road-busy:AMOD<br>crossing-road:DOBJ<br>park-car:DOBJ<br>cars-two:NUM<br>car-police:NN<br>root-trucks:ROOT<br>pavement-the:DET<br>root-lot:ROOT<br>ride-bike:NSUBJ<br>car-green:AMOD                                  |

Continued on next page

**Table1 – continued from previous page**

| Index                  | Image                                                                               | NUS-WIDE Concepts                                                                                             | SBU Concepts                                                                                                                                                                                                                                                                                                                |
|------------------------|-------------------------------------------------------------------------------------|---------------------------------------------------------------------------------------------------------------|-----------------------------------------------------------------------------------------------------------------------------------------------------------------------------------------------------------------------------------------------------------------------------------------------------------------------------|
| 39                     |    | car,racing,race<br>formula,historic,classic<br>racing,classic,cars<br>race,car,formula<br>classic,racing,cars | root-cars:ROOT<br>truck-red:AMOD<br>spotted-car:NSUBJ<br>trucks-the:DET<br>one-cars:PREP_OF<br>car-red:AMOD<br>car-yellow:AMOD<br>truck-white:AMOD<br>cars-trucks:CONJ_AND<br>root-trucks:ROOT<br>cars-many:AMOD<br>car-one:NUM<br>cars-two:NUM<br>car-field:PREP_IN<br>parked-car:NSUBJ                                    |
| 40                     |   | wildlife,elephant,safari<br>dogs,snow,beach<br>playing,animal,bear<br>fly,blue,sky<br>animal,dog,wild         | cow-the:DET<br>root-cow:ROOT<br>cows-road:PREP_IN<br>dog-car:PREP_IN<br>cow-a:DET<br>root-dogs:ROOT<br>pasture-the:DET<br>stick-a:DET<br>horses-white:AMOD<br>pony-a:DET<br>dog-truck:PREP_IN<br>root-sheep:ROOT<br>waiting-car:PREP_IN<br>dogs-two:NUM<br>view-rear:AMOD                                                   |
| 41                     |  | sailboat,ship,blue<br>sails,sunset,ocean<br>sail,ocean,sunset<br>warehouse>window,door<br>gray,building,light | sailboat-a:DET<br>sidewalk-a:DET<br>sailboat-the:DET<br>root-sailboat:ROOT<br>under-bridge:POBJ<br>plant-abandoned:AMOD<br>lake-town:NN<br>bridge-river:NN<br>sail-boat:DOBJ<br>boats-sail:AMOD<br>passing-bridge:PREP_UNDER<br>boat-bridge:PREP_UNDER<br>column-the:DET<br>bridge-water:PREP_OVER<br>back-building:PREP_OF |
| Continued on next page |                                                                                     |                                                                                                               |                                                                                                                                                                                                                                                                                                                             |

**Table1 – continued from previous page**

| Index | Image                                                                               | NUS-WIDE Concepts                                                                                                                         | SBU Concepts                                                                                                                                                                                                                                                                                                         |
|-------|-------------------------------------------------------------------------------------|-------------------------------------------------------------------------------------------------------------------------------------------|----------------------------------------------------------------------------------------------------------------------------------------------------------------------------------------------------------------------------------------------------------------------------------------------------------------------|
| 42    |    | pool,woman,swimming<br>water,ocean,beach<br>swimming,underwater,ocean<br>boy,water,beach<br>girls,beach,fun                               | ball-beach:NN<br>ball-water:PREP_IN<br>pool-the:DET<br>pool-swimming:NN<br>park-water:NN<br>boys-water:PREP_IN<br>swimming-pool:PREP_IN<br>playing-ball:DOBJ<br>pool-swimming:AMOD<br>plays-boy:NSUBJ<br>boy-water:PREP_IN<br>girl-boat:PREP_IN<br>play-to:AUX<br>playing-water:PREP_IN<br>swimming-water:PREP_IN    |
| 43    |   | design,interior,furniture<br>interior,furniture,house<br>home,interior,design<br>bathroom,abandoned,interior<br>modern,interior,furniture | room-dining:NN<br>bathroom-house:PREP_IN<br>bathroom-new:AMOD<br>lamp-floor:NN<br>root-bathroom:ROOT<br>root-downstairs:ROOT<br>bathroom-floor:NN<br>kitchen-old:AMOD<br>dining-room:DOBJ<br>bathroom-guest:NN<br>bathroom-the:DET<br>room-new:AMOD<br>curtain-shower:NN<br>root-shower:ROOT<br>leads-door:NSUBJ     |
| 44    |  | houseboat,summer>window<br>sailing,california,sky<br>adults,furniture,outdoors<br>boat,lake,blue<br>business,trip,river                   | roof-glass:NN<br>best-seat:DEP<br>building-glass:NN<br>ride-boat:NN<br>building-modern:AMOD<br>root-safe:ROOT<br>union-lake:NN<br>roof-station:PREP_OF<br>windows-building:PREP_OF<br>boat-cruise:NN<br>floor-glass:NN<br>home-train:NN<br>reflection-building:PREP_IN<br>head-street:PREP_IN<br>deck-observation:NN |

Continued on next page

Table1 – continued from previous page

| Index                  | Image                                                                               | NUS-WIDE Concepts                                                                                           | SBU Concepts                                                                                                                                                                                                                                                                                     |
|------------------------|-------------------------------------------------------------------------------------|-------------------------------------------------------------------------------------------------------------|--------------------------------------------------------------------------------------------------------------------------------------------------------------------------------------------------------------------------------------------------------------------------------------------------|
| 45                     |    | grass,cow,field<br>lawn,park,girl<br>horse,red,white<br>racing,horse,sport<br>rifles,uniform,world          | field-ball:NN<br>plant-tree:DOBJ<br>plate-home:NN<br>ball-basket:NN<br>trees-plant:NN<br>ball-the:DET<br>cup-the:DET<br>ball-plastic:AMOD<br>girl-dog:CONJ_AND<br>shirt-gray:AMOD<br>apple-the:DET<br>standing-wall:PREP_ON<br>root-students:ROOT<br>student-a:DET<br>grass-lush:AMOD            |
| 46                     |   | birds,tree,colorful<br>bird,tree,hawk<br>close,insect,fly<br>wings,insect,macro<br>macro,insect,butterfly   | bird-tree:PREP_IN<br>bird-blue:AMOD<br>bird-colorful:AMOD<br>branch-tree:PREP_OF<br>root-blackbird:ROOT<br>root-bird:ROOT<br>fence-wire:NN<br>jay-blue:AMOD<br>bird-cute:AMOD<br>bird-black:AMOD<br>spotted-bird:DOBJ<br>building-nest:DOBJ<br>birds-blue:AMOD<br>branch-a:DET<br>branch-the:DET |
| 47                     |  | child,boys,people<br>kid,people,water<br>portrait,sky,child<br>deer,handmade,cute<br>village,portrait,rural | playing-sand:PREP_IN<br>root-plays:ROOT<br>boy-a:DET<br>girl-little:AMOD<br>root-boy:ROOT<br>sitting-sand:PREP_IN<br>playing-girl:NN<br>sand-beach:PREP_AT<br>girl-small:AMOD<br>plays-boy:NSUBJ<br>castle-sand:NN<br>playing-boy:NN<br>pit-the:DET<br>play-to:AUX<br>boy-young:AMOD             |
| Continued on next page |                                                                                     |                                                                                                             |                                                                                                                                                                                                                                                                                                  |



Table1 – continued from previous page

| Index | Image                                                                               | NUS-WIDE Concepts                                                                                                                     | SBU Concepts                                                                                                                                                                                                                                                                                            |
|-------|-------------------------------------------------------------------------------------|---------------------------------------------------------------------------------------------------------------------------------------|---------------------------------------------------------------------------------------------------------------------------------------------------------------------------------------------------------------------------------------------------------------------------------------------------------|
| 48    |    | motorcycle,motion,asia<br>motorcycle,texas,explore<br>motorcycle,netherlands,nederland<br>bike,motorcycle,race<br>motorcycle,road,sky | motorcycle-a:DET<br>root-show:ROOT<br>show-car:NN<br>bike-road:NN<br>owner-the:DET<br>show-car:NSUBJ<br>dog-basket:PREP_IN<br>parked-street:PREP_ON<br>car-classic:AMOD<br>bike-front:PREP_IN<br>fair-street:NN<br>building-britannic:AMOD<br>bicycle-a:DET<br>show-a:DET<br>traffic-the:DET            |
| 49    |   | trip,summer,people<br>gun,guard,police<br>university,girl,people<br>design,light,red<br>police,politics,peace                         | van-60mm:NUM<br>shirt-an:DET<br>sign-to:AUX<br>bottle-the:DET<br>guy-shirt:PREP_IN<br>party-the:DET<br>office-field:NN<br>shirt-green:AMOD<br>boy-birthday:NN<br>enjoying-glass:DOBJ<br>had-girl:NSUBJ<br>person-the:DET<br>hats-the:DET<br>room-green:AMOD<br>cup-plastic:AMOD                         |
| 50    |  | sign,sky,road<br>leaves,water,macro<br>crystals,sewing,handmade<br>vacation,fun,people<br>football,stadium,sport                      | sign-park:PREP_IN<br>sign-house:PREP_NEAR<br>root-shoe:ROOT<br>road-sign:DEP<br>spotted-sign:DOBJ<br>root-book:ROOT<br>spotted-sign:NSUBJ<br>sign-warning:AMOD<br>warning-sign:DOBJ<br>sign-road:PREP_ON<br>posted-sign:NSUBJ<br>blue-a:DET<br>root-plate:ROOT<br>butterfly-blue:AMOD<br>week-last:AMOD |

Continued on next page

**Table1 – continued from previous page**

| Index | Image                                                                               | NUS-WIDE Concepts                                                                                             | SBU Concepts                                                                                                                                                                                                                                                                                          |
|-------|-------------------------------------------------------------------------------------|---------------------------------------------------------------------------------------------------------------|-------------------------------------------------------------------------------------------------------------------------------------------------------------------------------------------------------------------------------------------------------------------------------------------------------|
| 51    |    | field,cow,park<br>aircraft,pilot,fighter<br>politicians,bush,washington<br>texas,war,field<br>plane,fly,pilot | railroad-a:DET<br>sign-town:PREP_IN<br>sign-road:PREP_ON<br>sign-a:DET<br>box-newspaper:NN<br>ships-the:DET<br>sign-the:DET<br>sign-road:NN<br>sign-yellow:AMOD<br>sign-an:DET<br>lot-parking:NN<br>airport-the:DET<br>signs-the:DET<br>warning-sign:DOBJ<br>job-a:DET                                |
| 52    |   | cow,animals,nose<br>nose,dog,cow<br>goat,portrait,zoo<br>sheep,animal,horns<br>tusks,zoo,wildlife             | sheep-a:DET<br>root-pig:ROOT<br>old-months:NPADVMOD<br>dog-house:PREP_IN<br>eating-grass:DOBJ<br>taken-family:AGENT<br>stick-the:DET<br>home-car:NN<br>root-sheep:ROOT<br>cow-a:DET<br>root-goat:ROOT<br>cub-bear:NN<br>park-wildlife:NN<br>root-buddy:ROOT<br>goat-the:DET                           |
| 53    |  | fence,grass,field<br>fishing,nets,flood<br>railroad,ties,light<br>railing,sea,winter<br>soccer,beach,sunset   | fence-a:DET<br>tracks-train:NN<br>fence-wire:NN<br>tracks-railroad:NN<br>railroad-a:DET<br>wire-barbed:AMOD<br>fence-the:DET<br>places-unconventionnal:AMOD<br>dreams-places:PREP_OF<br>bike-dreams:DEP<br>bike-field:PREP_IN<br>burn-which:NSUBJ<br>root-fence:ROOT<br>track-a:DET<br>business-a:DET |

Continued on next page

Table1 – continued from previous page

| Index                  | Image                                                                               | NUS-WIDE Concepts                                                                                                                        | SBU Concepts                                                                                                                                                                                                                                                                                                  |
|------------------------|-------------------------------------------------------------------------------------|------------------------------------------------------------------------------------------------------------------------------------------|---------------------------------------------------------------------------------------------------------------------------------------------------------------------------------------------------------------------------------------------------------------------------------------------------------------|
| 54                     |    | jeep,cars,automobile<br>kuwait,car,cars<br>automobile,truck,california<br>auto,truck,canada<br>truck,tanker,massachusetts                | root-trucks:ROOT<br>truck-ford:NN<br>truck-pickup:NN<br>truck-field:PREP_IN<br>cars-trucks:CONJ_AND<br>root-truck:ROOT<br>parked-truck:NSUBJ<br>truck-big:AMOD<br>car-an:DET<br>truck-blue:AMOD<br>cars-many:AMOD<br>spotted-car:NSUBJ<br>car-house:PREP_OF<br>sitting-field:PREP_IN<br>car-one:NUM           |
| 55                     |   | car,automobile,truck<br>rally,car,racing<br>bug,car,automobile<br>vehicle,cars,speed<br>auto,automobile,race                             | root-car:ROOT<br>car-street:PREP_IN<br>parked-street:PREP_ON<br>window-rear:AMOD<br>one-cars:PREP_OF<br>car-rusty:AMOD<br>parked-street:PREP_IN<br>parked-car:NSUBJPASS<br>show-car:NSUBJ<br>car-abandoned:AMOD<br>show-building:PREP_AT<br>cars-two:NUM<br>car-old:AMOD<br>door-car:NN<br>car-street:PREP_ON |
| 56                     |  | bike,motorcycle,race<br>motorcycle,netherlands,nederland<br>bike,track,vintage<br>motorcycle,motion,asia<br>nederland,motorcycle,classic | bike-road:NN<br>bike-front:PREP_IN<br>bike-mountain:NN<br>motorcycle-a:DET<br>bicycle-a:DET<br>dog-basket:PREP_IN<br>truck-big:AMOD<br>ride-bike:DOBJ<br>race-a:DET<br>ride-to:AUX<br>ride-bike:NSUBJ<br>machine-green:AMOD<br>park-oak:NN<br>show-a:DET<br>seat-bike:NN                                      |
| Continued on next page |                                                                                     |                                                                                                                                          |                                                                                                                                                                                                                                                                                                               |

Table1 – continued from previous page

| Index                  | Image                                                                               | NUS-WIDE Concepts                                                                                                             | SBU Concepts                                                                                                                                                                                                                                                                                                                                                    |
|------------------------|-------------------------------------------------------------------------------------|-------------------------------------------------------------------------------------------------------------------------------|-----------------------------------------------------------------------------------------------------------------------------------------------------------------------------------------------------------------------------------------------------------------------------------------------------------------------------------------------------------------|
| 57                     |    | downtown,building,blue<br>buildings,building,travel<br>shops,urban,japan<br>stone,architecture,old<br>tourist,temple,portugal | houses-building:NSUBJ<br>building-built:VMOD<br>building-houses:RCMOD<br>street-shopping:NN<br>ground-zero:NUM<br>had-building:NSUBJ<br>building-square:PREP_IN<br>building-front:PREP_IN<br>building-government:NN<br>building-pink:AMOD<br>building-every:DET<br>building-oldest:AMOD<br>buildings-colorful:AMOD<br>building-large:AMOD<br>house-building:DEP |
| 58                     |   | cake,groom,party<br>fruit,water,closeup<br>glass,red,color<br>balloons,party,fun<br>peace,love,portrait                       | glass-a:DET<br>root-wine:ROOT<br>house-tea:NN<br>vase-the:DET<br>wine-red:AMOD<br>glass-water:NN<br>glasses-wine:NN<br>glass-wine:NN<br>beer-a:DET<br>root-tea:ROOT<br>cream-ice:NN<br>flower-glass:PREP_IN<br>glass-the:DET<br>root-fruit:ROOT<br>cake-velvet:NN                                                                                               |
| 59                     |  | cat,eyes,kitty<br>pets,cats,cat<br>feline,kitten,cats<br>kitten,fun,jump<br>kitty,eyes,feline                                 | lives-cat:NSUBJ<br>loves-cat:NSUBJ<br>cat-cute:AMOD<br>watching-birds:DOBJ<br>one-cats:PREP_OF<br>cat-house:PREP_IN<br>loves-sit:XCOMP<br>cat-orange:AMOD<br>likes-sit:XCOMP<br>border-white:AMOD<br>root-shelter:ROOT<br>cute-a:DET<br>chair-desk:NN<br>cat-street:NN<br>root-jack:ROOT                                                                        |
| Continued on next page |                                                                                     |                                                                                                                               |                                                                                                                                                                                                                                                                                                                                                                 |



Table1 – continued from previous page

| Index | Image                                                                               | NUS-WIDE Concepts                                                                                                                              | SBU Concepts                                                                                                                                                                                                                                                                                                                                                          |
|-------|-------------------------------------------------------------------------------------|------------------------------------------------------------------------------------------------------------------------------------------------|-----------------------------------------------------------------------------------------------------------------------------------------------------------------------------------------------------------------------------------------------------------------------------------------------------------------------------------------------------------------------|
| 60    |    | london,sky,river<br>facade,church,night<br>street,light,night<br>architecture,buildings,night<br>building,church,europe                        | building-government:NN<br>building-building:NSUBJ<br>building-brown:AMOD<br>building-yellow:AMOD<br>building-large:AMOD<br>building-white:AMOD<br>building-built:VMOD<br>building-big:AMOD<br>building-background:PREP_IN<br>building-front:PREP_IN<br>looking-building:DOBJ<br>spree-river:NN<br>building-beautiful:AMOD<br>seine-the:DET<br>building-middle:PREP_IN |
| 61    |   | weapons,red,black<br>wings,bird,sky<br>wow,airplane,flying<br>square,portrait,china<br>motorcycle,road,sky                                     | root-race:ROOT<br>line-the:DET<br>race-bike:NN<br>dragon-a:DET<br>times-a:DET<br>ride-bike:NSUBJ<br>woman-young:NSUBJ<br>motorcycle-a:DET<br>guitar-a:DET<br>root-guitar:ROOT<br>waters-the:DET<br>band-the:DET<br>race-a:DET<br>root-model:ROOT<br>body-the:DET                                                                                                      |
| 62    |  | police,protesters,protest<br>photojournalism,color,olympus<br>protest,riot,protesters<br>parade,seattle,officers<br>officers,motorcycle,people | motorcycle-a:DET<br>cross-street:DOBJ<br>show-tv:NN<br>race-a:DET<br>street-busy:AMOD<br>car-police:NN<br>scheme-white:AMOD<br>security-the:DET<br>boys-blue:PREP_IN<br>parade-the:DET<br>root-band:ROOT<br>crossing-street:DOBJ<br>scheme-black:AMOD<br>trucks-the:DET<br>traffic-the:DET                                                                            |

Continued on next page

Table1 – continued from previous page

| Index | Image                                                                               | NUS-WIDE Concepts                                                                                                             | SBU Concepts                                                                                                                                                                                                                                                                                                                    |
|-------|-------------------------------------------------------------------------------------|-------------------------------------------------------------------------------------------------------------------------------|---------------------------------------------------------------------------------------------------------------------------------------------------------------------------------------------------------------------------------------------------------------------------------------------------------------------------------|
| 63    |    | individual, person, people<br>christmas, dog, family<br>kiss, cute, wedding<br>wolf, red, fox<br>pair, animal, cat            | root-daughter:ROOT<br>house-girls:PREP_IN<br>girl-red:PREP_IN<br>house-chris:PREP_IN<br>flower-hair:PREP_IN<br>dress-red:AMOD<br>chris-girls:CONJ_AND<br>boy-red:PREP_IN<br>chris-house:PREP_AT<br>chris-uncle:NN<br>chair-computer:NN<br>red-black:CONJ_AND<br>shirt-red:AMOD<br>line-bathroom:PREP_FOR<br>has-girl:NSUBJ      |
| 64    |   | vehicle, cars, speed<br>automobile, ontario, speed<br>cars, racing, classic<br>speed, racing, car<br>auto, automobile, race   | car-toy:NN<br>car-blue:AMOD<br>warehouse-brick:NN<br>spotted-car:NSUBJ<br>car-rental:AMOD<br>car-french:AMOD<br>car-classic:AMOD<br>held-warehouse:PREP_IN<br>parked-car:NSUBJ<br>show-car:NN<br>warehouse-red:AMOD<br>car-field:PREP_IN<br>held-scenery:NSUBJ<br>parked-street:PREP_IN<br>root-car:ROOT                        |
| 65    |  | phone, red, night<br>telephones, night, red<br>tollbooth, scotland, street<br>apartments, pool, swimming<br>shop, sign, night | doors-blue:AMOD<br>street-little:AMOD<br>street-an:DET<br>doors-windows:CONJ_AND<br>door-windows:CONJ_AND<br>sign-white:AMOD<br>street-high:AMOD<br>windows-wall:PREP_IN<br>street-small:AMOD<br>machine-vending:AMOD<br>quarter-french:AMOD<br>sign-blue:AMOD<br>building-empty:AMOD<br>window-bar:PREP_OF<br>reads-sign:NSUBJ |

Continued on next page

Table1 – continued from previous page

| Index                  | Image                                                                               | NUS-WIDE Concepts                                                                                                                  | SBU Concepts                                                                                                                                                                                                                                                                                |
|------------------------|-------------------------------------------------------------------------------------|------------------------------------------------------------------------------------------------------------------------------------|---------------------------------------------------------------------------------------------------------------------------------------------------------------------------------------------------------------------------------------------------------------------------------------------|
| 66                     |    | tollbooth,car,lights<br>aviation,fighter,california<br>fun,party,happy<br>paris,panorama,polar<br>rain,umbrella,people             | screen-blue:AMOD<br>desk-a:DET<br>root-computer:ROOT<br>root-suite:ROOT<br>office-box:NN<br>screen-big:AMOD<br>bar-little:AMOD<br>show-tv:NN<br>booth-the:DET<br>train-the:DET<br>screen-the:DET<br>truck-the:DET<br>machine-the:DET<br>computer-a:DET<br>screen-video:AMOD                 |
| 67                     |   | truck,rusty,vintage<br>automobile,ontario,speed<br>antique,car,truck<br>car,automobile,truck<br>automobile,truck,california        | truck-red:AMOD<br>car-classic:AMOD<br>car-red:AMOD<br>truck-ford:NN<br>show-car:NN<br>parked-car:NSUBJ<br>truck-old:AMOD<br>show-car:NSUBJ<br>spotted-car:NSUBJ<br>car-little:AMOD<br>one-cars:PREP_OF<br>hood-the:DET<br>car-old:AMOD<br>cars-the:DET<br>car-blue:AMOD                     |
| 68                     |  | square,portrait,china<br>weapons,red,black<br>face,red,japan<br>photographer,people,photographers<br>adventure,photography,valleys | girl-car:PREP_IN<br>riding-cars:PREP_IN<br>car-the:DET<br>seat-car:PREP_OF<br>cute-boy:DOBJ<br>boy-car:PREP_IN<br>riding-car:PREP_IN<br>sitting-seat:PREP_IN<br>seat-back:AMOD<br>boy-cute:AMOD<br>best-seat:DEP<br>seat-front:AMOD<br>fair-street:NN<br>seats-car:NN<br>looking-cute:ACOMP |
| Continued on next page |                                                                                     |                                                                                                                                    |                                                                                                                                                                                                                                                                                             |

Table1 – continued from previous page

| Index | Image                                                                               | NUS-WIDE Concepts                                                                                                | SBU Concepts                                                                                                                                                                                                                                                                                          |
|-------|-------------------------------------------------------------------------------------|------------------------------------------------------------------------------------------------------------------|-------------------------------------------------------------------------------------------------------------------------------------------------------------------------------------------------------------------------------------------------------------------------------------------------------|
| 69    |    | elephants,sunset,travel<br>grass,cow,field<br>golf,spain,flag<br>meadow,color,autumn<br>lawn,park,girl           | root-horses:ROOT<br>horses-the:DET<br>standing-tree:PREP_UNDER<br>animals-park:NN<br>animals-run:CONJ_AND<br>sitting-tree:PREP_UNDER<br>habitat-a:DET<br>trees-three:NUM<br>cow-the:DET<br>horse-field:PREP_IN<br>cow-a:DET<br>root-cow:ROOT<br>run-birds:NN<br>root-horse:ROOT<br>cows-field:PREP_IN |
| 70    |   | child,boys,people<br>kids,boy,hope<br>golden,dog,yellow<br>holiday,christmas,fun<br>china,street,man             | dress-orange:AMOD<br>girls-two:NUM<br>at-beach:POBJ<br>root-kids:ROOT<br>girl-local:AMOD<br>had-time:DOBJ<br>flower-hair:PREP_IN<br>me-shirt:PREP_IN<br>canyon-red:AMOD<br>girls-playing:DEP<br>on-bridge:POBJ<br>girl-sitting:VMOD<br>village-a:DET<br>bridge-golden:AMOD<br>canyon-rock:NN          |
| 71    |  | police,car,cars<br>bus,abandoned,clouds<br>auto,truck,canada<br>engine,truck,auto<br>firefighter,truck,manhattan | buses-the:DET<br>bus-tour:NN<br>root-van:ROOT<br>van-white:AMOD<br>car-street:NN<br>bus-city:NN<br>car-green:AMOD<br>has-car:NSUBJ<br>station-bus:NN<br>van-a:DET<br>cars-many:AMOD<br>van-the:DET<br>truck-front:PREP_IN<br>see-car:DOBJ<br>middle-street:PREP_OF                                    |

Continued on next page



**Table1 – continued from previous page**

| Index | Image                                                                               | NUS-WIDE Concepts                                                                                                    | SBU Concepts                                                                                                                                                                                                                                                                                         |
|-------|-------------------------------------------------------------------------------------|----------------------------------------------------------------------------------------------------------------------|------------------------------------------------------------------------------------------------------------------------------------------------------------------------------------------------------------------------------------------------------------------------------------------------------|
| 72    |    | sheep,animal,horns<br>goat,mountain,wildlife<br>sheep,alaska,mountain<br>caribou,animals,alaska<br>running,dog,horse | horse-white:AMOD<br>goat-mountain:NN<br>root-goat:ROOT<br>horse-field:PREP_IN<br>pony-a:DET<br>root-sheep:ROOT<br>dog-white:AMOD<br>horses-white:AMOD<br>cow-field:PREP_IN<br>cow-a:DET<br>crossing-road:DOBJ<br>root-cow:ROOT<br>family-foster:AMOD<br>sheep-field:PREP_IN<br>goat-a:DET            |
| 73    |   | bird,tree,hawk<br>brasil,colors,color<br>adult,bird,birds<br>american,animal,eagle<br>wildlife,bird,birds            | bird-sitting:VMOD<br>root-parrot:ROOT<br>sanctuary-bird:NN<br>bird-male:AMOD<br>rica-costa:NN<br>branch-tree:NN<br>spotted-tree:PREP_IN<br>birds-the:DET<br>bird-beautiful:AMOD<br>sitting-bird:NSUBJ<br>branch-a:DET<br>sitting-fence:PREP_ON<br>park-bird:NN<br>exhibit-the:DET<br>bird-large:AMOD |
| 74    |  | kids,art,baby<br>toy,figures,green<br>kitchen,pink,toys<br>toys,pink,yellow<br>boston,dog,puppy                      | girl-big:AMOD<br>paper-wrapping:NN<br>cute-too:ADVMOD<br>girl-birthday:NN<br>girl-pink:PREP_IN<br>shirt-pink:AMOD<br>dress-up:PRT<br>girls-the:DET<br>root-clothes:ROOT<br>turned-party:PREP_WITH<br>bottles-water:NN<br>turned-girl:NSUBJ<br>sink-kitchen:NN<br>bears-the:DET<br>root-nap:ROOT      |

Continued on next page

Table1 – continued from previous page

| Index                  | Image                                                                               | NUS-WIDE Concepts                                                                                                          | SBU Concepts                                                                                                                                                                                                                                                                                                     |
|------------------------|-------------------------------------------------------------------------------------|----------------------------------------------------------------------------------------------------------------------------|------------------------------------------------------------------------------------------------------------------------------------------------------------------------------------------------------------------------------------------------------------------------------------------------------------------|
| 75                     |    | deer,handmade,cute<br>paint,street,painting<br>long,white,hair<br>smile,cute,art<br>garden,closeup,insect                  | pot-the:DET<br>green-white:CONJ_AND<br>pot-a:DET<br>cute-so:ADVMOD<br>root-green:ROOT<br>pot-flower:NN<br>root-jade:ROOT<br>plants-potted:AMOD<br>guy-little:AMOD<br>houses-bird:NN<br>pot-plant:NN<br>root-hangs:ROOT<br>backyard-the:DET<br>hangs-out:PRT<br>cake-cup:NN                                       |
| 76                     |   | vegetables,color,people<br>cottage,garden,architecture<br>post,night,street<br>plants,trees,tree<br>house>window,door      | house-town:PREP_IN<br>boxes-flower:NN<br>boxes-window:NN<br>tree-new:AMOD<br>root-front:ROOT<br>street-side:NN<br>house-cool:AMOD<br>pots-the:DET<br>house-traditional:AMOD<br>house-a:DET<br>box-window:NN<br>house-street:PREP_IN<br>plants-pots:PREP_IN<br>root-shrine:ROOT<br>house-area:PREP_IN             |
| 77                     |  | ceremony,dance,child<br>portland,lights,microphones<br>house,home,interior<br>science,art,death<br>lighting,music,festival | black-white:CONJ_AND<br>film-white:AMOD<br>portrait-black:PREP_IN<br>shot-white:PREP_IN<br>in-white:POBJ<br>root-photo:ROOT<br>shot-black:PREP_IN<br>film-black:AMOD<br>portrait-self:NN<br>in-black:POBJ<br>version-black:AMOD<br>black-in:ADVMOD<br>mirror-bathroom:NSUBJ<br>black-the:DEP<br>photo-white:AMOD |
| Continued on next page |                                                                                     |                                                                                                                            |                                                                                                                                                                                                                                                                                                                  |

**Table1 – continued from previous page**

| Index | Image                                                                               | NUS-WIDE Concepts                                                                                                   | SBU Concepts                                                                                                                                                                                                                                                                                      |
|-------|-------------------------------------------------------------------------------------|---------------------------------------------------------------------------------------------------------------------|---------------------------------------------------------------------------------------------------------------------------------------------------------------------------------------------------------------------------------------------------------------------------------------------------|
| 78    |    | horses,explore,animal<br>racing,horse,sport<br>horse,argentina,field<br>running,dog,horse<br>uniform,world,historic | taken-family:AGENT<br>horse-white:AMOD<br>family-foster:AMOD<br>retriever-golden:AMOD<br>horses-the:DET<br>dog-service:NN<br>root-dogs:ROOT<br>forest-new:NN<br>walking-dogs:DOBJ<br>pony-a:DET<br>dog-white:AMOD<br>root-horse:ROOT<br>horse-black:AMOD<br>market-animal:NN<br>horses-white:AMOD |
| 79    |   | puppy,baby,animals<br>play,dog,dogs<br>pups,yellow,pet<br>running,dog,horse<br>alaska,sheep,wildlife                | boy-dog:CONJ_AND<br>beach-dog:NN<br>lion-mountain:NN<br>lion-a:DET<br>dogs-two:NUM<br>dog-brown:AMOD<br>dogs-the:DET<br>cub-a:DET<br>root-dogs:ROOT<br>goat-a:DET<br>beach-pebble:AMOD<br>cat-orange:AMOD<br>cat-street:NN<br>puppy-a:DET<br>dog-cute:AMOD                                        |
| 80    |  | mug,dog,pet<br>paint,design,yellow<br>tour,washington,people<br>small,big,man<br>colourful,color,colours            | cloth-table:NN<br>cups-the:DET<br>bowl-the:DET<br>root-cup:ROOT<br>root-tea:ROOT<br>root-bowls:ROOT<br>rose-petals:DOBJ<br>root-balls:ROOT<br>cup-the:DET<br>sale-market:PREP_IN<br>girl-birthday:NN<br>root-cups:ROOT<br>cloth-a:DET<br>balls-glass:NN<br>bowl-big:AMOD                          |

Continued on next page

**Table1 – continued from previous page**

| Index | Image                                                                               | NUS-WIDE Concepts                                                                                                        | SBU Concepts                                                                                                                                                                                                                                                                                                             |
|-------|-------------------------------------------------------------------------------------|--------------------------------------------------------------------------------------------------------------------------|--------------------------------------------------------------------------------------------------------------------------------------------------------------------------------------------------------------------------------------------------------------------------------------------------------------------------|
| 81    |    | zoo,bird,giraffe<br>american,animal,eagle<br>adult,bird,birds<br>birds,wings,white<br>fab,animal,animals                 | heron-a:DET<br>bird-large:AMOD<br>heron-blue:AMOD<br>heron-great:AMOD<br>exhibit-the:DET<br>bird-water:NN<br>root-heron:ROOT<br>bird-the:DET<br>one-birds:PREP_OF<br>park-wildlife:NN<br>duck-the:DET<br>duck-black:AMOD<br>sitting-bird:NSUBJ<br>duck-white:AMOD<br>pigeon-a:DET                                        |
| 82    |   | golf,spain,flag<br>sheep,landscape,sky<br>cows,trees,grass<br>lawn,clouds,landscape<br>grass,cow,field                   | fields-green:AMOD<br>green-so:ADVMOD<br>field-cow:NN<br>field-soccer:NN<br>green-grass:NSUBJ<br>lawn-the:DET<br>house-field:NN<br>field-big:AMOD<br>house-background:PREP_IN<br>field-front:PREP_IN<br>greens-the:DET<br>field-football:NN<br>field-large:AMOD<br>green-very:ADVMOD<br>park-golden:NN                    |
| 83    |  | flying,california,pilot<br>music,art,red<br>windows,people,clouds<br>bazaar,iran,light<br>shopping,architecture,building | theatre-the:DET<br>building-background:PREP_IN<br>film-black:AMOD<br>house-opera:NN<br>building-capital:NN<br>film-white:AMOD<br>taken-white:PREP_IN<br>square-the:DET<br>bridge-tower:NN<br>field-football:NN<br>court-the:DET<br>black-white:CONJ_AND<br>ship-bottle:PREP_IN<br>sky-black:AMOD<br>bridge-black:PREP_IN |

Continued on next page



**Table1 – continued from previous page**

| Index                  | Image                                                                               | NUS-WIDE Concepts                                                                                                            | SBU Concepts                                                                                                                                                                                                                                                                                                       |
|------------------------|-------------------------------------------------------------------------------------|------------------------------------------------------------------------------------------------------------------------------|--------------------------------------------------------------------------------------------------------------------------------------------------------------------------------------------------------------------------------------------------------------------------------------------------------------------|
| 84                     |    | room,design,home<br>kitchen,interior,design<br>interior,furniture,house<br>design,interior,furniture<br>decoration,home,room | root-room:ROOT<br>room-dining:NN<br>room-living:AMOD<br>living-room:DOBJ<br>room-guest:NN<br>dining-room:DOBJ<br>room-the:DET<br>room-house:PREP_IN<br>bedroom-house:PREP_OF<br>table-chairs:CONJ_AND<br>looking-room:PREP_INTO<br>door-looking:VMOD<br>room-great:AMOD<br>rooms-the:DET<br>room-living:NN         |
| 85                     |   | office,apple,mac<br>coffee,man,apple<br>home,interior,design<br>apple,office,mac<br>display,apple,mac                        | desk-office:PREP_IN<br>room-hotel:NN<br>desk-computer:NN<br>bed-room:PREP_IN<br>computer-the:DET<br>office-new:AMOD<br>bedroom-house:PREP_OF<br>sit-to:AUX<br>room-living:NN<br>bed-bedroom:PREP_IN<br>desk-room:PREP_IN<br>house-parent:POSS<br>table-window:PREP_BY<br>root-desk:ROOT<br>office-home:NN          |
| 86                     |  | trees,leaves,autumn<br>tree,trunk,leaves<br>forest,wood,light<br>trunk,tree,green<br>woods,leaves,path                       | grow-trees:NSUBJ<br>forest-rain:NN<br>trees-forest:PREP_IN<br>forest-cloud:NN<br>rainforest-the:DET<br>forest-green:AMOD<br>in-forest:POBJ<br>tree-forest:PREP_IN<br>canopy-the:DET<br>climbing-tree:DOBJ<br>trees-all:PREDET<br>mountains-blue:AMOD<br>root-forest:ROOT<br>forest-a:DET<br>walking-forest:PREP_IN |
| Continued on next page |                                                                                     |                                                                                                                              |                                                                                                                                                                                                                                                                                                                    |

Table1 – continued from previous page

| Index | Image                                                                               | NUS-WIDE Concepts                                                                                                               | SBU Concepts                                                                                                                                                                                                                                                                                                                                 |
|-------|-------------------------------------------------------------------------------------|---------------------------------------------------------------------------------------------------------------------------------|----------------------------------------------------------------------------------------------------------------------------------------------------------------------------------------------------------------------------------------------------------------------------------------------------------------------------------------------|
| 87    |    | farm,animal,cow<br>cow,animals,nose<br>cows,scotland,horns<br>nature,wildlife,animal<br>june,animal,mammal                      | cow-a:DET<br>field-a:DET<br>root-cow:ROOT<br>cow-field:PREP_IN<br>root-lions:ROOT<br>grass-green:AMOD<br>pig-a:DET<br>root-skull:ROOT<br>sheep-a:DET<br>lion-stone:NN<br>eating-grass:DOBJ<br>stump-the:DET<br>playing-grass:PREP_IN<br>grass-field:PREP_IN<br>stump-tree:NN                                                                 |
| 88    |   | fence,red,color<br>pole,light,bird<br>lines,wall,shadow<br>wood,door,old<br>floor,people,black                                  | bird-window:PREP_IN<br>mirror-bathroom:PREP_IN<br>box-bird:NN<br>lamp-an:DET<br>fence-a:DET<br>post-lamp:NN<br>lamp-street:NN<br>door-house:PREP_IN<br>wire-a:DET<br>door-a:DET<br>fixture-light:AMOD<br>wires-the:DET<br>orange-an:DET<br>flying-bird:NSUBJ<br>parrot-a:DET                                                                 |
| 89    |  | facade,church,night<br>pakistan,architecture,mosque<br>tourism,europe,trip<br>tourist,temple,portugal<br>downtown,building,blue | building-built:VMOD<br>row-houses:PREP_OF<br>building-interesting:AMOD<br>house-court:NN<br>building-city:NN<br>cool-building:DOBJ<br>building-station:NN<br>building-town:PREP_IN<br>building-post:NN<br>building-area:PREP_IN<br>mosque-the:DET<br>building-favorite:AMOD<br>building-style:NN<br>had-building:NSUBJ<br>house-building:DEP |

Continued on next page

Table1 – continued from previous page

| Index | Image                                                                                                                                                               | NUS-WIDE Concepts                                                                                                                      | SBU Concepts                                                                                                                                                                                                                                                                                                                    |
|-------|---------------------------------------------------------------------------------------------------------------------------------------------------------------------|----------------------------------------------------------------------------------------------------------------------------------------|---------------------------------------------------------------------------------------------------------------------------------------------------------------------------------------------------------------------------------------------------------------------------------------------------------------------------------|
| 90    |  <p>2006.11.23 阿嬷抱著宝贝在沙发后(grandma hug daughter play on sofa) - Photo by Golden</p> | <p>peace,love,portrait<br/>human,school,photo<br/>small,big,man<br/>men,male,sports<br/>gold,color,art</p>                             | <p>boy-sitting:VMOD<br/>sitting-desk:PREP_AT<br/>woman-sitting:VMOD<br/>seat-house:PREP_IN<br/>girl-sitting:VMOD<br/>woman-an:DET<br/>girl-boy:CONJ_AND<br/>root-woman:ROOT<br/>reading-book:DOBJ<br/>root-student:ROOT<br/>computer-a:DET<br/>man-sitting:DEP<br/>phone-mobile:AMOD<br/>woman-young:NSUBJ<br/>outfit-a:DET</p> |
| 91    |                                                                                   | <p>motorcycle,motion,asia<br/>bike,motorcycle,race<br/>motorcycle,road,sky<br/>parade,school,old<br/>police,car,cars</p>               | <p>bike-front:PREP_IN<br/>motorcycle-a:DET<br/>ride-bike:DOBJ<br/>race-a:DET<br/>bicycle-a:DET<br/>show-car:NN<br/>root-show:ROOT<br/>scene-typical:AMOD<br/>trailer-the:DET<br/>machine-green:AMOD<br/>cap-the:DET<br/>man-an:DET<br/>pick-up:PRT<br/>truck-big:AMOD<br/>car-green:AMOD</p>                                    |
| 92    |                                                                                  | <p>tracks,locomotive,station<br/>locomotive,bridge,track<br/>railway,bridge,steam<br/>railroad,locomotive,steam<br/>train,sky,city</p> | <p>train-a:DET<br/>tracks-railroad:NN<br/>root-train:ROOT<br/>yard-train:NN<br/>tracks-train:NN<br/>train-an:DET<br/>car-box:NN<br/>cars-train:NN<br/>tracks-train:NSUBJ<br/>mill-the:DET<br/>mill-paper:NN<br/>train-freight:NN<br/>fire-a:DET<br/>goes-train:NSUBJ<br/>train-old:AMOD</p>                                     |

Continued on next page

Table1 – continued from previous page

| Index                  | Image                                                                               | NUS-WIDE Concepts                                                                                                                          | SBU Concepts                                                                                                                                                                                                                                                                                                               |
|------------------------|-------------------------------------------------------------------------------------|--------------------------------------------------------------------------------------------------------------------------------------------|----------------------------------------------------------------------------------------------------------------------------------------------------------------------------------------------------------------------------------------------------------------------------------------------------------------------------|
| 93                     |    | truck,tanker,massachusetts<br>bus,abandoned,clouds<br>vehicle,abandoned,rust<br>firefighter,truck,manhattan<br>auto,truck,canada           | buses-the:DET<br>train-road:NN<br>truck-fire:NN<br>car-street:NN<br>root-van:ROOT<br>train-little:AMOD<br>truck-water:NN<br>station-bus:NN<br>see-car:DOBJ<br>truck-blue:AMOD<br>parked-car:NSUBJ<br>cars-two:NUM<br>car-one:NUM<br>house-car:CONJ_AND<br>root-truck:ROOT                                                  |
| 94                     |   | interior,furniture,house<br>furniture,architecture,interior<br>design,interior,furniture<br>chairs,interior,office<br>home,interior,design | room-house:PREP_IN<br>bedroom-house:PREP_OF<br>living-room:DOBJ<br>root-room:ROOT<br>table-kitchen:PREP_IN<br>room-house:PREP_OF<br>table-window:PREP_BY<br>room-dining:NN<br>root-bedroom:ROOT<br>one-rooms:PREP_OF<br>house-bedroom:AMOD<br>leads-door:NSUBJ<br>room-great:AMOD<br>room-new:AMOD<br>root-guest:ROOT      |
| 95                     |  | running,dog,horse<br>dog,white,explore<br>grass,cow,field<br>run,dog,fun<br>deer,wildlife,forest                                           | running-field:PREP_IN<br>grass-lush:AMOD<br>dog-field:PREP_IN<br>dog-grass:PREP_IN<br>eating-grass:DOBJ<br>lake-house:PREP_BEHIND<br>in-field:POBJ<br>playing-grass:PREP_IN<br>running-grass:PREP_IN<br>in-grass:POBJ<br>eat-to:AUX<br>grass-the:DET<br>spotted-field:PREP_IN<br>horse-white:AMOD<br>sitting-grass:PREP_ON |
| Continued on next page |                                                                                     |                                                                                                                                            |                                                                                                                                                                                                                                                                                                                            |



Table1 – continued from previous page

| Index                  | Image                                                                               | NUS-WIDE Concepts                                                                                              | SBU Concepts                                                                                                                                                                                                                                                                                |
|------------------------|-------------------------------------------------------------------------------------|----------------------------------------------------------------------------------------------------------------|---------------------------------------------------------------------------------------------------------------------------------------------------------------------------------------------------------------------------------------------------------------------------------------------|
| 96                     |    | dogs,funny,cute<br>pet,dog,puppy<br>puppy,baby,animals<br>brown,animal,bear<br>dog,animals,explore             | sleeping-basket:PREP_IN<br>fair-state:NN<br>pillow-a:DET<br>dish-water:NN<br>girl-bed:PREP_IN<br>sitting-basket:PREP_IN<br>visit-to:AUX<br>pillow-the:DET<br>root-fat:ROOT<br>old-weeks:NPADVMOD<br>root-sleeps:ROOT<br>puppy-the:DET<br>house-cat:NN<br>taking-nap:DOBJ<br>root-puppy:ROOT |
| 97                     |   | horses,portrait,animal<br>leaf,autumn,bravo<br>horse,red,white<br>awesome,fun,florida<br>brown,animal,bear     | chain-a:DET<br>cat-orange:AMOD<br>horse-a:DET<br>arm-the:DET<br>hangs-out:PRT<br>monkeys-the:DET<br>root-finds:ROOT<br>mouse-a:DET<br>box-bird:NN<br>lion-tree:PREP_IN<br>spotted-garden:PREP_IN<br>creature-a:DET<br>taking-nap:DOBJ<br>climbing-tree:DOBJ<br>lion-mountain:NN             |
| 98                     |  | bike,motorcycle,race<br>motorcycle,motion,asia<br>motorcycle,road,sky<br>sport,race,car<br>bicycle,motion,girl | motorcycle-a:DET<br>ride-bike:DOBJ<br>owner-the:DET<br>bike-front:PREP_IN<br>cap-the:DET<br>dog-basket:PREP_IN<br>race-a:DET<br>bike-road:NN<br>bicycle-a:DET<br>girl-sexy:AMOD<br>show-car:NN<br>seat-bike:NN<br>ride-to:AUX<br>machine-green:AMOD<br>fair-street:NN                       |
| Continued on next page |                                                                                     |                                                                                                                |                                                                                                                                                                                                                                                                                             |

Table1 – continued from previous page

| Index                  | Image                                                                               | NUS-WIDE Concepts                                                                                          | SBU Concepts                                                                                                                                                                                                                                                                                    |
|------------------------|-------------------------------------------------------------------------------------|------------------------------------------------------------------------------------------------------------|-------------------------------------------------------------------------------------------------------------------------------------------------------------------------------------------------------------------------------------------------------------------------------------------------|
| 99                     |    | cow,rural,sky<br>cows,clouds,grass<br>grass,cow,field<br>run,dog,fun<br>mother,animal,cat                  | cow-a:DET<br>cow-field:PREP_IN<br>root-cow:ROOT<br>horse-black:AMOD<br>pasture-the:DET<br>pasture-a:DET<br>cow-the:DET<br>eating-grass:DOBJ<br>standing-field:PREP_IN<br>root-horses:ROOT<br>horses-white:AMOD<br>root-horse:ROOT<br>running-field:PREP_IN<br>root-catch:ROOT<br>horses-the:DET |
| 100                    |   | apple,office,mac<br>mac,leopard,display<br>office,apple,mac<br>mac,office,photography<br>display,apple,mac | desk-office:PREP_IN<br>computer-the:DET<br>root-desk:ROOT<br>monitor-the:DET<br>laptop-the:DET<br>desk-new:AMOD<br>keyboard-the:DET<br>desk-room:PREP_IN<br>screen-the:DET<br>office-the:DET<br>desk-computer:NN<br>desk-the:DET<br>tv-screen:NN<br>root-monitor:ROOT<br>office-new:AMOD        |
| 101                    |  | dog,animals,explore<br>dogs,funny,cute<br>nose,dog,cow<br>pets,pups,dog<br>dog,white,explore               | dog-black:AMOD<br>root-puppy:ROOT<br>boy-good:AMOD<br>puppy-a:DET<br>puppy-cute:AMOD<br>dog-brown:AMOD<br>seat-back:AMOD<br>ball-tennis:NN<br>dog-house:PREP_IN<br>root-loves:ROOT<br>puppy-the:DET<br>dog-box:PREP_IN<br>dog-car:PREP_IN<br>root-charlie:ROOT<br>house-dog:NN                  |
| Continued on next page |                                                                                     |                                                                                                            |                                                                                                                                                                                                                                                                                                 |

**Table1 – continued from previous page**

| Index                  | Image                                                                               | NUS-WIDE Concepts                                                                                                                  | SBU Concepts                                                                                                                                                                                                                                                                                               |
|------------------------|-------------------------------------------------------------------------------------|------------------------------------------------------------------------------------------------------------------------------------|------------------------------------------------------------------------------------------------------------------------------------------------------------------------------------------------------------------------------------------------------------------------------------------------------------|
| 102                    |    | ocean,clouds,sunset<br>sunset,landscape,sea<br>boat,sunset,sun<br>sailboat,ocean,sunset<br>orange,sunset,sky                       | root-sunset:ROOT<br>sunset-a:DET<br>coast-east:AMOD<br>taken-beach:PREP_FROM<br>sunset-golden:AMOD<br>gulf-the:DET<br>sun-setting:NN<br>root-sunrise:ROOT<br>boat-ocean:PREP_IN<br>sunset-the:DET<br>sun-sky:PREP_IN<br>horizon-the:DET<br>root-sail:ROOT<br>sets-sun:NSUBJ<br>taken-beach:PREP_ON         |
| 103                    |   | classic,automobile,red<br>car,automobile,truck<br>auto,automobile,race<br>automobile,transportation,vintage<br>vintage,car,classic | root-show:ROOT<br>car-classic:AMOD<br>show-car:NSUBJ<br>show-car:NN<br>one-cars:PREP_OF<br>parked-street:PREP_ON<br>car-old:AMOD<br>car-toy:NN<br>truck-red:AMOD<br>cars-two:NUM<br>car-red:AMOD<br>car-vintage:AMOD<br>car-street:PREP_IN<br>building-d70:PREP_IN<br>parked-car:NSUBJ                     |
| 104                    |  | airplane,clouds,sky<br>airport,runway,sky<br>aircraft,pilot,fighter<br>polaroid,marsh,landscape<br>wings,bird,sky                  | airplane-a:DET<br>car-lot:PREP_IN<br>lot-the:DET<br>line-white:AMOD<br>taken-pictures:NSUBJPASS<br>root-ice:ROOT<br>garage-parking:NN<br>from-window:POBJ<br>lines-the:DET<br>river-frozen:AMOD<br>lot-parking:NN<br>driving-car:PREP_IN<br>root-lot:ROOT<br>taken-morning:PREP_IN<br>window-plane:PREP_OF |
| Continued on next page |                                                                                     |                                                                                                                                    |                                                                                                                                                                                                                                                                                                            |

Table1 – continued from previous page

| Index | Image                                                                               | NUS-WIDE Concepts                                                                                                     | SBU Concepts                                                                                                                                                                                                                                                                                |
|-------|-------------------------------------------------------------------------------------|-----------------------------------------------------------------------------------------------------------------------|---------------------------------------------------------------------------------------------------------------------------------------------------------------------------------------------------------------------------------------------------------------------------------------------|
| 105   |    | bus,abandoned,clouds<br>vehicle,abandoned,rust<br>auto,truck,canada<br>police,car,cars<br>automobile,truck,california | car-street:NN<br>root-van:ROOT<br>van-a:DET<br>buses-the:DET<br>bus-city:NN<br>parked-street:PREP_IN<br>van-the:DET<br>car-green:AMOD<br>truck-blue:AMOD<br>see-car:DOBJ<br>truck-water:NN<br>bus-tour:NN<br>has-car:NSUBJ<br>car-street:PREP_ON<br>bus-school:NN                           |
| 106   |   | bird,tree,hawk<br>adult,bird,birds<br>hawk,red,georgia<br>animal,bird,reptile<br>american,animal,eagle                | one-birds:PREP_OF<br>bird-little:AMOD<br>bird-sitting:VMOD<br>pigeon-a:DET<br>sitting-fence:PREP_ON<br>bird-an:DET<br>hawk-a:DET<br>spotted-bird:DOBJ<br>birds-many:AMOD<br>bird-small:AMOD<br>bird-male:AMOD<br>sparrow-house:NN<br>sitting-bird:NSUBJ<br>feeders-bird:NN<br>sparrow-a:DET |
| 107   |  | apple,office,mac<br>office,apple,mac<br>mac,office,photography<br>home,interior,design<br>work,office,apple           | desk-room:PREP_IN<br>desk-computer:NN<br>desk-the:DET<br>root-desk:ROOT<br>desk-office:PREP_IN<br>desk-new:AMOD<br>desk-a:DET<br>desk-office:NN<br>laptop-the:DET<br>area-bar:NN<br>shelf-book:NN<br>desk-bedroom:PREP_IN<br>cabinet-the:DET<br>sink-kitchen:PREP_IN<br>root-computer:ROOT  |

Continued on next page



Table1 – continued from previous page

| Index | Image                                                                               | NUS-WIDE Concepts                                                                                                | SBU Concepts                                                                                                                                                                                                                                                                                                               |
|-------|-------------------------------------------------------------------------------------|------------------------------------------------------------------------------------------------------------------|----------------------------------------------------------------------------------------------------------------------------------------------------------------------------------------------------------------------------------------------------------------------------------------------------------------------------|
| 108   |    | run,dog,fun<br>foals,horse,mare<br>grass,cow,field<br>running,dog,horse<br>puppy,baby,animals                    | dog-black:AMOD<br>horse-black:AMOD<br>grass-lush:AMOD<br>playing-field:PREP_IN<br>ball-tennis:NN<br>walking-field:PREP_IN<br>running-grass:PREP_IN<br>playing-ball:DOBJ<br>sitting-grass:PREP_ON<br>cow-field:PREP_IN<br>in-grass:POBJ<br>dog-grass:PREP_IN<br>bird-black:AMOD<br>duck-black:AMOD<br>running-field:PREP_IN |
| 109   |   | deer,wildlife,forest<br>fawn,nature,white<br>ontario,fawn,animal<br>woods,deer,wildlife<br>photos,animal,images  | cat-orange:AMOD<br>cat-street:NN<br>cat-house:NN<br>cat-box:PREP_IN<br>deer-a:DET<br>porch-back:AMOD<br>root-fox:ROOT<br>food-dog:NN<br>kitty-box:PREP_IN<br>one-cats:PREP_OF<br>cat-window:PREP_IN<br>dish-water:NN<br>watching-birds:DOBJ<br>cat-cute:AMOD<br>root-sleeps:ROOT                                           |
| 110   |  | historical,war,germany<br>door,windows,house<br>agent,night,street<br>carpet,room,chair<br>warehouse>window,door | box-yellow:AMOD<br>sign-yellow:AMOD<br>house-blue:AMOD<br>car-street:NN<br>dog-window:PREP_IN<br>root-russia:ROOT<br>sign-little:AMOD<br>hours-the:DET<br>warehouse-a:DET<br>live-people:NSUBJ<br>goes-train:NSUBJ<br>root-waits:ROOT<br>car-yellow:AMOD<br>sign-window:PREP_IN<br>department-the:DET                      |

Continued on next page

**Table1 – continued from previous page**

| Index                  | Image                                                                               | NUS-WIDE Concepts                                                                                                                  | SBU Concepts                                                                                                                                                                                                                                                                                                                                                                                    |
|------------------------|-------------------------------------------------------------------------------------|------------------------------------------------------------------------------------------------------------------------------------|-------------------------------------------------------------------------------------------------------------------------------------------------------------------------------------------------------------------------------------------------------------------------------------------------------------------------------------------------------------------------------------------------|
| 111                    |    | chairs,interior,office<br>design,interior,furniture<br>room>window,abandoned<br>interior,furniture,house<br>abandoned,ruin,factory | dining-room:DOBJ<br>table-window:PREP_BY<br>living-room:DOBJ<br>root-lounge:ROOT<br>room-sitting:AMOD<br>kitchen-house:PREP_IN<br>room-great:AMOD<br>root-kitchen:ROOT<br>window-bay:NN<br>room-house:PREP_IN<br>sliding-doors:DOBJ<br>leads-door:NSUBJ<br>area-bar:NN<br>lounge-the:DET<br>tables-chairs:CONJ_AND                                                                              |
| 112                    |   | truck,sky,clouds<br>rain,night,reflection<br>suburban,arizona,landscape<br>high,texas,metro<br>nederland,architecture,city         | looking-road:DOBJ<br>building-walking:VMOD<br>trees-palm:NN<br>streets-buildings:CONJ_AND<br>building-background:PREP_IN<br>pictures-buildings:PREP_OF<br>pictures-streets:PREP_OF<br>view-office:PREP_FROM<br>streets-beautiful:AMOD<br>trees-flowers:CONJ_AND<br>pictures-building:PREP_OF<br>pictures-pictures:NSUBJ<br>view-street:PREP_OF<br>building-back:PREP_IN<br>see-distance:PREP_IN |
| 113                    |  | dogs,funny,cute<br>dog,animals,explore<br>pets,pups,dog<br>cute,dog,puppy<br>pups,yellow,pet                                       | root-puppy:ROOT<br>puppy-a:DET<br>dogs-two:NUM<br>root-buddy:ROOT<br>dog-lazy:AMOD<br>puppy-cute:AMOD<br>dog-white:AMOD<br>boy-good:AMOD<br>root-doggy:ROOT<br>dog-bag:PREP_IN<br>root-black:ROOT<br>black-white:AMOD<br>root-puppies:ROOT<br>dog-box:PREP_IN<br>animals-stuffed:AMOD                                                                                                           |
| Continued on next page |                                                                                     |                                                                                                                                    |                                                                                                                                                                                                                                                                                                                                                                                                 |

**Table1 – continued from previous page**

| Index                  | Image                                                                               | NUS-WIDE Concepts                                                                                                | SBU Concepts                                                                                                                                                                                                                                                                                                                 |
|------------------------|-------------------------------------------------------------------------------------|------------------------------------------------------------------------------------------------------------------|------------------------------------------------------------------------------------------------------------------------------------------------------------------------------------------------------------------------------------------------------------------------------------------------------------------------------|
| 114                    |    | car,automobile,truck<br>vintage,car,classic<br>classic,automobile,red<br>auto,truck,canada<br>antique,car,truck  | car-vintage:AMOD<br>car-classic:AMOD<br>one-cars:PREP_OF<br>car-old:AMOD<br>root-car:ROOT<br>car-a:DET<br>car-an:DET<br>car-street:PREP_IN<br>truck-ford:NN<br>bed-truck:PREP_OF<br>parked-street:PREP_ON<br>car-little:AMOD<br>car-rusty:AMOD<br>cars-old:AMOD<br>car-abandoned:AMOD                                        |
| 115                    |   | family,love,red<br>cheering,fun,national<br>moose,dog,puppy<br>halloween,cosume,chicago<br>police,politics,peace | animals-stuffed:AMOD<br>sitting-seat:PREP_IN<br>boy-car:PREP_IN<br>sitting-box:PREP_IN<br>looked-cute:ACOMP<br>party-the:DET<br>sitting-basket:PREP_IN<br>sitting-floor:PREP_ON<br>girls-standing:DEP<br>cats-black:AMOD<br>chair-boy:NN<br>book-new:AMOD<br>has-girl:NSUBJ<br>line-bathroom:PREP_FOR<br>girls-house:PREP_IN |
| 116                    |  | cow,animals,nose<br>farm,animal,cow<br>brown,animal,bear<br>animals,africa,deer<br>horses,portrait,animal        | head-a:DET<br>cow-a:DET<br>sheep-a:DET<br>root-cow:ROOT<br>cow-field:PREP_IN<br>root-skull:ROOT<br>hangs-out:PRT<br>crack-a:DET<br>root-goat:ROOT<br>brown-white:CONJ_AND<br>dog-brown:AMOD<br>house-rock:NN<br>lake-park:NN<br>goat-a:DET<br>market-market:APPOS                                                            |
| Continued on next page |                                                                                     |                                                                                                                  |                                                                                                                                                                                                                                                                                                                              |

**Table1 – continued from previous page**

| Index | Image                                                                               | NUS-WIDE Concepts                                                                                                       | SBU Concepts                                                                                                                                                                                                                                                                                                    |
|-------|-------------------------------------------------------------------------------------|-------------------------------------------------------------------------------------------------------------------------|-----------------------------------------------------------------------------------------------------------------------------------------------------------------------------------------------------------------------------------------------------------------------------------------------------------------|
| 117   |    | tanks,oil,sunset<br>holidays,sunset,sky<br>oil,field,kuwait<br>standing,people,men<br>film,sky,urban                    | palm-trees:DOBJ<br>root-palm:ROOT<br>palm-trees:DEP<br>trees-palm:NN<br>looking-street:DOBJ<br>monument-a:DET<br>middle-street:PREP_OF<br>docks-the:DET<br>lined-tree:NSUBJ<br>monica-santa:NN<br>people-walking:VMOD<br>standing-the:DET<br>lined-street:DOBJ<br>road-beach:NN<br>building-distance:PREP_IN    |
| 118   |   | buddha,gold,statue<br>microphones,lights,festival<br>warehouse,girl,fashion<br>palm,florida,politics<br>bar,new,factory | lit-light:PREP_BY<br>light-candle:NN<br>house-street:NN<br>standing-girl:NN<br>root-band:ROOT<br>market-christmas:NN<br>rock-house:DOBJ<br>window-red:AMOD<br>try-stage:DOBJ<br>bar-local:AMOD<br>sun-coming:VMOD<br>lights-street:NN<br>girl-jacket:PREP_IN<br>light-red:AMOD<br>light-yellow:AMOD             |
| 119   |  | burma,photojournalism,faces<br>fish,food,aquarium<br>christmas,dog,family<br>social,brazil,brasil<br>bear,man,cute      | eat-to:AUX<br>cake-birthday:NN<br>read-book:DOBJ<br>root-breakfast:ROOT<br>sit-chair:PREP_IN<br>table-dinner:NN<br>book-a:DET<br>table-room:PREP_IN<br>boy-chair:PREP_IN<br>root-loves:ROOT<br>boy-cute:AMOD<br>root-reads:ROOT<br>sitting-office:PREP_IN<br>house-grandparents:POSS<br>sitting-kitchen:PREP_IN |

Continued on next page



Table1 – continued from previous page

| Index | Image                                                                               | NUS-WIDE Concepts                                                                                                        | SBU Concepts                                                                                                                                                                                                                                                                                |
|-------|-------------------------------------------------------------------------------------|--------------------------------------------------------------------------------------------------------------------------|---------------------------------------------------------------------------------------------------------------------------------------------------------------------------------------------------------------------------------------------------------------------------------------------|
| 120   |    | bike,motorcycle,race<br>motorcycle,motion,asia<br>motorcycle,road,sky<br>bicycle,motion,girl<br>driver,white,horse       | bike-road:NN<br>bike-front:PREP_IN<br>race-bike:NN<br>dog-basket:PREP_IN<br>race-mountain:NN<br>bike-mountain:NN<br>bicycle-a:DET<br>race-a:DET<br>ride-to:AUX<br>biking-mountain:NN<br>race-the:DET<br>trip-bike:NN<br>ride-bike:NN<br>ride-bike:DOBJ<br>machine-green:AMOD                |
| 121   |   | post,germany,digital<br>ladder,sky,water<br>commercials,space,red<br>aviation,fighter,california<br>abstract,bravo,white | root-airplane:ROOT<br>morning-foggy:AMOD<br>plane-sky:PREP_IN<br>sky-grey:AMOD<br>plane-flying:DEP<br>wall-bedroom:NN<br>root-plane:ROOT<br>root-lines:ROOT<br>airplane-a:DET<br>aeroplane-an:DET<br>airplane-an:DET<br>plane-a:DET<br>wire-a:DET<br>crack-wall:PREP_IN<br>telephone-a:DET  |
| 122   |  | railroad,locomotive,steam<br>locomotive,bridge,track<br>train,sky,city<br>military,tanks,army<br>railway,bridge,steam    | train-passenger:NN<br>cars-the:DET<br>mill-paper:NN<br>bridge-white:PREP_IN<br>film-white:AMOD<br>building-bridge:DOBJ<br>train-freight:NN<br>root-train:ROOT<br>pass-to:AUX<br>bridge-black:PREP_IN<br>yard-train:NN<br>van-door:DEP<br>train-a:DET<br>train-old:AMOD<br>root-crosses:ROOT |

Continued on next page

**Table1 – continued from previous page**

| Index                  | Image                                                                               | NUS-WIDE Concepts                                                                                                                         | SBU Concepts                                                                                                                                                                                                                                                                                               |
|------------------------|-------------------------------------------------------------------------------------|-------------------------------------------------------------------------------------------------------------------------------------------|------------------------------------------------------------------------------------------------------------------------------------------------------------------------------------------------------------------------------------------------------------------------------------------------------------|
| 123                    |    | adorable,rabbit,bunny<br>kitty,white,cats<br>funny,cute,cat<br>cat,eyes,kitty<br>sweet,pet,animal                                         | in-bag:POBJ<br>cute-being:COP<br>cat-white:AMOD<br>cat-bag:PREP_IN<br>chair-computer:NN<br>brought-home:DOBJ<br>chair-office:NN<br>loves-sitting:XCOMP<br>cat-house:PREP_IN<br>loves-sit:XCOMP<br>chair-bag:NN<br>table-computer:NN<br>chair-desk:NN<br>root-cats:ROOT<br>root-jack:ROOT                   |
| 124                    |   | birds,tree,colorful<br>color,macro,flower<br>bird,tree,hawk<br>leaves,water,macro<br>green,flower,macro                                   | root-finch:ROOT<br>greenhouse-the:DET<br>bird-male:AMOD<br>flower-front:PREP_IN<br>root-parrot:ROOT<br>finch-house:NN<br>buds-flower:NN<br>bird-singing:NN<br>conservatory-the:DET<br>bird-colorful:AMOD<br>garden-house:PREP_OF<br>tree-green:AMOD<br>gardens-kew:NN<br>root-bud:ROOT<br>has-flowers:DOBJ |
| 125                    |  | uniform,world,historic<br>motorcycle,road,sky<br>police,protesters,protest<br>officers,motorcycle,people<br>photojournalism,color,olympus | motorcycle-a:DET<br>show-tv:NN<br>girl-dog:CONJ_AND<br>root-race:ROOT<br>root-bags:ROOT<br>race-a:DET<br>time-good:AMOD<br>event-the:DET<br>father-son:CONJ_AND<br>road-white:AMOD<br>kid-shirt:PREP_IN<br>race-the:DET<br>shot-street:NN<br>horse-black:AMOD<br>root-fight:ROOT                           |
| Continued on next page |                                                                                     |                                                                                                                                           |                                                                                                                                                                                                                                                                                                            |

Table1 – continued from previous page

| Index | Image                                                                               | NUS-WIDE Concepts                                                                                              | SBU Concepts                                                                                                                                                                                                                                                                                                     |
|-------|-------------------------------------------------------------------------------------|----------------------------------------------------------------------------------------------------------------|------------------------------------------------------------------------------------------------------------------------------------------------------------------------------------------------------------------------------------------------------------------------------------------------------------------|
| 126   |    | police,car,cars<br>roadblock,water,tree<br>rally,car,racing<br>driver,cars,auto<br>suburban,car,wild           | parked-car:NSUBJ<br>lot-parking:NN<br>parked-car:NSUBJPASS<br>lot-the:DET<br>cars-two:NUM<br>car-rental:AMOD<br>plate-license:NN<br>van-the:DET<br>cars-trucks:CONJ_AND<br>cars-many:AMOD<br>street-house:PREP_IN_FRONT_OF<br>car-lot:PREP_IN<br>car-street:PREP_IN<br>see-car:DOBJ<br>cars-the:DET              |
| 127   |   | motorcycle,road,sky<br>motorcycle,motion,asia<br>formula,classic,sport<br>sport,race,car<br>track,formula,race | red-black:CONJ_AND<br>motorcycle-a:DET<br>truck-red:AMOD<br>bike-front:PREP_IN<br>car-rental:AMOD<br>show-car:NN<br>parked-street:PREP_ON<br>car-pink:AMOD<br>car-one:NUM<br>ride-bike:DOBJ<br>pick-up:PRT<br>truck-big:AMOD<br>fondant-white:AMOD<br>cars-two:NUM<br>ride-to:AUX                                |
| 128   |  | police,car,cars<br>auto,truck,canada<br>car,automobile,truck<br>jeep,sky,blue<br>jeep,cars,automobile          | car-old:AMOD<br>cars-trucks:CONJ_AND<br>root-car:ROOT<br>car-background:PREP_IN<br>car-front:PREP_IN<br>parked-street:PREP_IN<br>parked-street:PREP_ON<br>house-car:CONJ_AND<br>truck-the:DET<br>car-street:PREP_ON<br>root-split:ROOT<br>car-the:DET<br>car-house:PREP_OF<br>cars-old:AMOD<br>spotted-car:NSUBJ |

Continued on next page

Table1 – continued from previous page

| Index | Image                                                                               | NUS-WIDE Concepts                                                                                             | SBU Concepts                                                                                                                                                                                                                                                                                                   |
|-------|-------------------------------------------------------------------------------------|---------------------------------------------------------------------------------------------------------------|----------------------------------------------------------------------------------------------------------------------------------------------------------------------------------------------------------------------------------------------------------------------------------------------------------------|
| 129   |    | toys,action,funny<br>rock,music,concert<br>toy,action,fun<br>stadium,game,people<br>america,politics,democrat | screen-green:AMOD<br>wall-red:AMOD<br>studio-the:DET<br>door-red:AMOD<br>band-the:DET<br>root-figures:ROOT<br>dressed-black:PREP_IN<br>root-princess:ROOT<br>year-new:AMOD<br>seat-best:AMOD<br>root-angels:ROOT<br>root-dude:ROOT<br>standing-<br>wall:PREP_IN_FRONT_OF<br>dress-paper:NN<br>pants-black:AMOD |
| 130   |   | cute,cats,cat<br>kitten,pets,baby<br>kitty,white,cats<br>pets,cats,cat<br>feline,kitten,cats                  | cat-white:AMOD<br>root-shelter:ROOT<br>root-kittens:ROOT<br>cat-cute:AMOD<br>cat-white:PREP_IN<br>house-friend:POSS<br>lives-cat:NSUBJ<br>loves-sit:XCOMP<br>loves-cat:NSUBJ<br>cat-street:NN<br>table-kitchen:NN<br>watching-birds:DOBJ<br>one-cats:PREP_OF<br>cat-house:NN<br>moment-a:DET                   |
| 131   |  | sport,race,car<br>race,car,auto<br>speed,racing,car<br>auto,automobile,race<br>automobile,ontario,speed       | show-car:NN<br>show-car:NSUBJ<br>car-classic:AMOD<br>car-new:AMOD<br>one-cars:PREP_OF<br>building-d70:PREP_IN<br>car-yellow:AMOD<br>show-building:PREP_AT<br>car-red:AMOD<br>car-parked:VMOD<br>root-show:ROOT<br>truck-ford:NN<br>car-black:AMOD<br>car-toy:NN<br>building-britannic:AMOD                     |

Continued on next page



Table1 – continued from previous page

| Index | Image                                                                               | NUS-WIDE Concepts                                                                                                           | SBU Concepts                                                                                                                                                                                                                                                                                            |
|-------|-------------------------------------------------------------------------------------|-----------------------------------------------------------------------------------------------------------------------------|---------------------------------------------------------------------------------------------------------------------------------------------------------------------------------------------------------------------------------------------------------------------------------------------------------|
| 132   |    | boys, girls, kid<br>mural, blue, red<br>jump, swim, boy<br>smile, fun, water<br>picture, portrait, people                   | house-beach:NN<br>girls-house:PREP_IN<br>dress-blue:AMOD<br>root-party:ROOT<br>root-kids:ROOT<br>bed-boy:NN<br>men-the:DET<br>building-house:DOBJ<br>one-shirt:PREP_IN<br>shirt-orange:AMOD<br>dress-the:DET<br>children-the:DET<br>shirt-blue:AMOD<br>night-bed:PREP_IN<br>painting-wall:PREP_ON       |
| 133   |   | urban, abandoned, night<br>car, road, light<br>tollbooth, illinois, chicago<br>bridge, ship, car<br>morning, people, coffee | cars-the:DET<br>street-front:PREP_IN<br>ferry-the:DET<br>road-busy:AMOD<br>taken-window:PREP_OUT_OF<br>cross-river:DOBJ<br>building-'re:AUX<br>boats-the:DET<br>view-table:PREP_FROM<br>trailer-a:DET<br>truck-front:PREP_IN<br>from-window:POBJ<br>truck-pickup:NN<br>root-cars:ROOT<br>station-bus:NN |
| 134   |  | bench, people, sitting<br>israel, art, color<br>lawn, park, girl<br>countryside, farm, field<br>green, forest, trees        | plants-tomato:NN<br>bird-colorful:AMOD<br>plant-to:AUX<br>root-parrot:ROOT<br>root-garden:ROOT<br>plant-flowers:DOBJ<br>bird-beautiful:AMOD<br>plant-tomato:NN<br>table-bird:NN<br>tree-bottle:NN<br>parrot-a:DET<br>garden-water:NN<br>system-a:DET<br>bed-yard:PREP_IN<br>bird-red:AMOD               |

Continued on next page

Table1 – continued from previous page

| Index                  | Image                                                                               | NUS-WIDE Concepts                                                                                                                       | SBU Concepts                                                                                                                                                                                                                                                                                            |
|------------------------|-------------------------------------------------------------------------------------|-----------------------------------------------------------------------------------------------------------------------------------------|---------------------------------------------------------------------------------------------------------------------------------------------------------------------------------------------------------------------------------------------------------------------------------------------------------|
| 135                    |    | bike,motorcycle,race<br>motorcycle,netherlands,nederland<br>formula,classic,sport<br>motorcycle,motion,asia<br>motorcycle,texas,explore | bike-road:NN<br>bike-front:PREP_IN<br>motorcycle-a:DET<br>bicycle-a:DET<br>dog-basket:PREP_IN<br>basket-bike:NN<br>root-show:ROOT<br>bike-mountain:NN<br>ride-to:AUX<br>ride-bike:DOBJ<br>streets-the:DET<br>traffic-the:DET<br>building-britannic:AMOD<br>car-new:AMOD<br>show-car:NSUBJ               |
| 136                    |   | cute,cats,cat<br>kitten,pets,baby<br>kitty,white,cats<br>puppy,white,animals<br>lovely,cute,cat                                         | kitty-window:PREP_IN<br>cat-white:PREP_IN<br>sitting-sun:PREP_IN<br>root-sill:ROOT<br>root-loves:ROOT<br>enjoying-sun:DOBJ<br>window-open:AMOD<br>cat-street:NN<br>lives-cat:NSUBJ<br>cute-being:COP<br>window-sunny:AMOD<br>cat-lives:RCMOD<br>likes-sit:XCOMP<br>cat-black:PREP_IN<br>loves-cat:NSUBJ |
| 137                    |  | male,men,boy<br>horse,red,white<br>dive,coral,scuba<br>holland,dance,light<br>basket,basketball,cheerleader                             | horse-a:DET<br>boy-young:AMOD<br>root-horse:ROOT<br>horses-the:DET<br>swim-the:DET<br>swim-lake:PREP_IN<br>chair-blue:AMOD<br>temple-a:DET<br>root-workers:ROOT<br>horse-the:DET<br>mai-chiang:NN<br>tri-sprint:NN<br>cage-the:DET<br>chair-beach:NN<br>swim-bike:CONJ_AND                              |
| Continued on next page |                                                                                     |                                                                                                                                         |                                                                                                                                                                                                                                                                                                         |

**Table1 – continued from previous page**

| Index | Image                                                                               | NUS-WIDE Concepts                                                                                                                   | SBU Concepts                                                                                                                                                                                                                                                                                                       |
|-------|-------------------------------------------------------------------------------------|-------------------------------------------------------------------------------------------------------------------------------------|--------------------------------------------------------------------------------------------------------------------------------------------------------------------------------------------------------------------------------------------------------------------------------------------------------------------|
| 138   |    | stairs,railing,urban<br>steps,shadow,shadows<br>balcony,apartments,shadow<br>london,underground,architecture<br>railroad,ties,light | environment-the:DET<br>root-stairs:ROOT<br>crane-a:DET<br>frame-door:NN<br>side-back:AMOD<br>walking-bridge:PREP_OVER<br>corner-the:DET<br>root-staircase:ROOT<br>construction-the:DET<br>crane-the:DET<br>buildings-new:AMOD<br>tracks-train:NN<br>ladder-the:DET<br>side-building:PREP_OF<br>cars-two:NUM        |
| 139   |   | floor>window,interior<br>interior,furniture,house<br>design,interior,furniture<br>decoration,home,room<br>guest,room,cat            | dress-wedding:NN<br>bed-queen:NN<br>root-guest:ROOT<br>room-living:NN<br>has-bedroom:NSUBJ<br>towels-the:DET<br>floor-room:PREP_IN<br>bedroom-house:PREP_OF<br>bed-bedroom:PREP_IN<br>bedroom-front:AMOD<br>root-floor:ROOT<br>bedroom-spare:AMOD<br>bedroom-house:PREP_IN<br>floor-bedroom:PREP_IN<br>room-bed:NN |
| 140   |  | tent,yellow,colorful<br>favorite,sky,clouds<br>canoe,reflection,trees<br>truck,sky,clouds<br>raw,abstract,explore                   | tree-bare:AMOD<br>tree-bottle:NN<br>summer-the:DET<br>blue-deep:AMOD<br>tree-large:AMOD<br>tree-road:PREP_IN<br>tree-winter:PREP_IN<br>tree-young:AMOD<br>pine-tree:DOBJ<br>shot-tree:PREP_OF<br>has-tree:NSUBJ<br>root-plant:ROOT<br>tree-park:PREP_IN<br>root-summer:ROOT<br>planted-tree:DOBJ                   |

Continued on next page

Table1 – continued from previous page

| Index                  | Image                                                                               | NUS-WIDE Concepts                                                                                                    | SBU Concepts                                                                                                                                                                                                                                                                                                                              |
|------------------------|-------------------------------------------------------------------------------------|----------------------------------------------------------------------------------------------------------------------|-------------------------------------------------------------------------------------------------------------------------------------------------------------------------------------------------------------------------------------------------------------------------------------------------------------------------------------------|
| 141                    |    | sepia,building,france<br>truck,old,color<br>sepia,portrait,girl<br>perspective,church,italy<br>great,french,historic | shot-white:PREP_IN<br>black-white:CONJ_AND<br>image-white:AMOD<br>root-black:ROOT<br>photography-white:AMOD<br>conversion-white:AMOD<br>car-old:AMOD<br>film-white:AMOD<br>root-iron:ROOT<br>shot-black:PREP_IN<br>taken-white:PREP_IN<br>black-white:PREP_IN<br>converted-white:PREP_TO<br>version-white:AMOD<br>converted-black:PREP_TO |
| 142                    |   | bird,tree,hawk<br>birds,tree,colorful<br>maryland,animal,animals<br>brasil,colors,color<br>sunlight,green,summer     | bird-colorful:AMOD<br>bird-blue:AMOD<br>bird-male:AMOD<br>bird-sitting:VMOD<br>one-birds:PREP_OF<br>bird-an:DET<br>feathers-the:DET<br>parrot-a:DET<br>root-blackbird:ROOT<br>blue-green:CONJ_AND<br>bird-beautiful:AMOD<br>feeder-bird:NN<br>root-parrot:ROOT<br>spotted-bird:DOBJ<br>seed-bird:NN                                       |
| 143                    |  | seascape,sunrise,coast<br>australia,coast,ocean<br>snow,tree,trees<br>sand,landscape,clouds<br>frozen,sunset,lake    | window-office:PREP_IN<br>window-train:NN<br>level-water:NN<br>reflection-window:PREP_IN<br>view-window:PREP_FROM<br>view-ocean:PREP_OF<br>balcony-hotel:NN<br>window-office:NN<br>view-window:PREP_OUT<br>line-water:NN<br>view-ocean:NN<br>view-office:PREP_FROM<br>window-hotel:PREP_OF<br>view-room:PREP_FROM<br>bank-a:DET            |
| Continued on next page |                                                                                     |                                                                                                                      |                                                                                                                                                                                                                                                                                                                                           |



**Table1 – continued from previous page**

| Index | Image                                                                               | NUS-WIDE Concepts                                                                                                                   | SBU Concepts                                                                                                                                                                                                                                                                                         |
|-------|-------------------------------------------------------------------------------------|-------------------------------------------------------------------------------------------------------------------------------------|------------------------------------------------------------------------------------------------------------------------------------------------------------------------------------------------------------------------------------------------------------------------------------------------------|
| 144   |    | kid,people,water<br>pair,animal,cat<br>boys,girls,kid<br>basket,basketball,cheerleader<br>family,people,old                         | family-the:DET<br>root-brother:ROOT<br>bedroom-new:AMOD<br>lions-the:DET<br>root-doll:ROOT<br>woman-an:DET<br>girl-looking:VMOD<br>girls-white:PREP_IN<br>woman-sitting:VMOD<br>park-city:NN<br>bedroom-house:PREP_OF<br>painting-wall:PREP_ON<br>girl-a:DET<br>root-mother:ROOT<br>dress-white:AMOD |
| 145   |   | runway,flight,aviation<br>united,airplane,airport<br>landing,aviation,flying<br>international,aircraft,airplane<br>flying,jet,wings | airplane-a:DET<br>plane-a:DET<br>view-ship:PREP_OF<br>land-to:AUX<br>chairs-beach:NN<br>passes-as:MARK<br>view-beach:PREP_FROM<br>machine-flying:AMOD<br>beach-the:DET<br>view-beach:PREP_OF<br>beach-island:NN<br>beach-sandy:AMOD<br>house-light:AMOD<br>boat-white:AMOD<br>ship-cruise:NSUBJ      |
| 146   |  | doorway,girl,woman<br>suburban,car,wild<br>helicopters,public,alaska<br>waiting,bench,chair<br>mosques,asia,islam                   | root-pants:ROOT<br>front-door:PREP_OF<br>open-door:DOBJ<br>door-open:AMOD<br>door-red:AMOD<br>root-sock:ROOT<br>open-door:NSUBJ<br>clothes-the:DET<br>door-the:DET<br>floor-a:DET<br>door-floor:PREP_IN<br>chair-orange:AMOD<br>cat-black:AMOD<br>store-clothing:NN<br>bag-little:AMOD               |

Continued on next page

Table1 – continued from previous page

| Index | Image                                                                               | NUS-WIDE Concepts                                                                                                              | SBU Concepts                                                                                                                                                                                                                                                                                                 |
|-------|-------------------------------------------------------------------------------------|--------------------------------------------------------------------------------------------------------------------------------|--------------------------------------------------------------------------------------------------------------------------------------------------------------------------------------------------------------------------------------------------------------------------------------------------------------|
| 147   |    | fan,portrait,dance<br>fantasy,costume,play<br>singing,concert,band<br>drum,festival,rock<br>band,brooklyn,lights               | dress-red:AMOD<br>pants-red:AMOD<br>dress-the:DET<br>woman-dress:PREP_IN<br>dress-shoes:CONJ_AND<br>standing-girl:NN<br>girl-dress:PREP_IN<br>girl-red:PREP_IN<br>outfit-a:DET<br>in-dress:POBJ<br>dress-pink:AMOD<br>girls-red:PREP_IN<br>girl-the:DET<br>shirt-red:AMOD<br>dance-the:DET                   |
| 148   |   | classroom,california,apple<br>work,office,apple<br>chairs,interior,office<br>cafe,bar,street<br>meeting,office,war             | lab-computer:NN<br>tables-chairs:CONJ_AND<br>chairs-the:DET<br>area-bar:NN<br>root-tables:ROOT<br>classroom-the:DET<br>root-lounge:ROOT<br>area-floor:NN<br>lab-the:DET<br>in-room:POBJ<br>tables-the:DET<br>kitchen-house:NN<br>desk-a:DET<br>room-green:AMOD<br>table-window:PREP_BY                       |
| 149   |  | interior,furniture,house<br>home,interior,design<br>room,design,home<br>studio,microphones,office<br>design,interior,furniture | root-room:ROOT<br>room-living:NN<br>office-home:NN<br>bedroom-house:PREP_IN<br>root-desk:ROOT<br>room-living:AMOD<br>closet-the:DET<br>desk-bedroom:PREP_IN<br>room-computer:NN<br>desk-room:PREP_IN<br>bedroom-house:PREP_OF<br>desk-new:AMOD<br>living-room:DOBJ<br>room-house:PREP_IN<br>dining-room:DOBJ |

Continued on next page

Table1 – continued from previous page

| Index | Image                                                                               | NUS-WIDE Concepts                                                                                                                          | SBU Concepts                                                                                                                                                                                                                                                                                                                 |
|-------|-------------------------------------------------------------------------------------|--------------------------------------------------------------------------------------------------------------------------------------------|------------------------------------------------------------------------------------------------------------------------------------------------------------------------------------------------------------------------------------------------------------------------------------------------------------------------------|
| 150   |    | individual, person, people<br>blue, architecture, building<br>standing, people, woman<br>cubism, art, red<br>portland, lights, microphones | screen-the:DET<br>boat-glass:NN<br>mirror-bathroom:NSUBJ<br>wall-water:NN<br>robot-window:PREP_IN<br>window-noiselab:NN<br>mirror-bathroom:PREP_IN<br>subway-the:DET<br>screen-laptop:AMOD<br>standing-window:PREP_IN<br>boy-window:PREP_IN<br>portrait-self:NN<br>window-door:NN<br>monitor-computer:NN<br>back-van:PREP_OF |
| 151   |   | phone, maps, camera<br>telephones, night, red<br>mac, black, music<br>cellphones, library, sign<br>bathroom, water, blue                   | machine-vending:AMOD<br>root-machine:ROOT<br>machine-old:AMOD<br>box-newspaper:NN<br>door-office:NN<br>root-computer:ROOT<br>panel-the:DET<br>cabinet-a:DET<br>sticker-a:DET<br>booth-the:DET<br>machine-an:DET<br>box-paper:NN<br>machine-a:DET<br>computer-the:DET<br>root-box:ROOT                                        |
| 152   |  | soldier, mountains, marine<br>war, ship, history<br>track, locomotive, engine<br>railroad, locomotive, steam<br>military, tanks, army      | photo-white:AMOD<br>photo-black:AMOD<br>shot-the:DET<br>taken-white:PREP_IN<br>taken-black:PREP_IN<br>film-black:AMOD<br>tanks-water:NN<br>film-white:AMOD<br>yard-train:NN<br>black-white:CONJ_AND<br>mill-paper:NN<br>in-black:POBJ<br>shot-white:AMOD<br>in-white:POBJ<br>black-a:DET                                     |

Continued on next page

Table1 – continued from previous page

| Index                  | Image                                                                               | NUS-WIDE Concepts                                                                                             | SBU Concepts                                                                                                                                                                                                                                                                                                  |
|------------------------|-------------------------------------------------------------------------------------|---------------------------------------------------------------------------------------------------------------|---------------------------------------------------------------------------------------------------------------------------------------------------------------------------------------------------------------------------------------------------------------------------------------------------------------|
| 153                    |    | cows,clouds,grass<br>cow,rural,sky<br>horses,explore,animal<br>animals,africa,deer<br>horse,sky,landscape     | cow-a:DET<br>root-horses:ROOT<br>horse-white:AMOD<br>horses-white:AMOD<br>root-cow:ROOT<br>horses-the:DET<br>cow-field:PREP_IN<br>root-dogs:ROOT<br>root-goat:ROOT<br>root-horse:ROOT<br>root-sheep:ROOT<br>goat-a:DET<br>horses-wild:AMOD<br>group-a:DET<br>cows-field:PREP_IN                               |
| 154                    |   | book,dog,funny<br>toy,figures,green<br>refugees,africa,boy<br>figures,new,phone<br>prayer,people,buddhism     | table-train:NN<br>sitting-box:PREP_IN<br>wrapping-paper:DOBJ<br>playing-box:PREP_IN<br>paper-wrapping:NN<br>animals-stuffed:AMOD<br>box-the:DET<br>chris-house:PREP_AT<br>chris-girls:CONJ_AND<br>chair-boy:NN<br>chair-girl:NN<br>girls-little:AMOD<br>root-loves:ROOT<br>bags-plastic:AMOD<br>girl-big:AMOD |
| 155                    |  | formula,classic,sport<br>auto,truck,canada<br>vehicle,vintage,automobile<br>race,car,auto<br>rally,car,racing | car-green:AMOD<br>root-car:ROOT<br>car-red:AMOD<br>car-blue:AMOD<br>car-street:PREP_ON<br>car-old:AMOD<br>car-little:AMOD<br>root-waits:ROOT<br>car-street:PREP_IN<br>car-cute:AMOD<br>riding-car:PREP_IN<br>parked-street:PREP_IN<br>car-parked:VMOD<br>machine-green:AMOD<br>car-front:PREP_IN              |
| Continued on next page |                                                                                     |                                                                                                               |                                                                                                                                                                                                                                                                                                               |



Table1 – continued from previous page

| Index                  | Image                                                                               | NUS-WIDE Concepts                                                                                              | SBU Concepts                                                                                                                                                                                                                                                                                                                   |
|------------------------|-------------------------------------------------------------------------------------|----------------------------------------------------------------------------------------------------------------|--------------------------------------------------------------------------------------------------------------------------------------------------------------------------------------------------------------------------------------------------------------------------------------------------------------------------------|
| 156                    |    | plants,trees,tree<br>moss,trees,tree<br>tropical,beautiful,animals<br>trail,forest,trees<br>garden,trees,tree  | forest-monkey:NN<br>plants-tomato:NN<br>house-tree:NN<br>tree-banyan:NN<br>tree-fig:NN<br>roots-tree:NN<br>root-plants:ROOT<br>tree-huge:AMOD<br>trees-banana:NN<br>tree-banana:NN<br>plants-trees:CONJ_AND<br>root-banana:ROOT<br>tree-giant:AMOD<br>root-forest:ROOT<br>forest-bamboo:NN                                     |
| 157                    |   | yellow,color,colors<br>windows,people,clouds<br>toy,action,fun<br>night,moon,sky<br>race,car,auto              | car-yellow:AMOD<br>center-shopping:NN<br>blue-the:DET<br>sky-night:NN<br>sign-neon:NN<br>building-sky:PREP_IN<br>background-blue:AMOD<br>building-sky:PREP_AGAINST<br>blue-yellow:CONJ_AND<br>sign-the:DET<br>tower-prague:PREP_IN<br>take-shot:DOBJ<br>root-clock:ROOT<br>shot-building:PREP_OF<br>root-night:ROOT            |
| 158                    |  | highway,night,traffic<br>tracks,light,clouds<br>traffic,highway,road<br>cars,night,light<br>motion,tunnel,road | line-white:AMOD<br>bridge-highway:PREP_OVER<br>root-highway:ROOT<br>taken-bridge:PREP_FROM<br>highway-a:DET<br>over-bridge:POBJ<br>lane-bike:NN<br>highway-the:DET<br>seen-bridge:PREP_FROM<br>road-ring:NN<br>road-long:AMOD<br>bridge-road:PREP_OVER<br>bridge-tracks:PREP_OVER<br>bridge-water:NN<br>bridge-pedestrian:AMOD |
| Continued on next page |                                                                                     |                                                                                                                |                                                                                                                                                                                                                                                                                                                                |

Table1 – continued from previous page

| Index | Image                                                                               | NUS-WIDE Concepts                                                                                                        | SBU Concepts                                                                                                                                                                                                                                                                                                  |
|-------|-------------------------------------------------------------------------------------|--------------------------------------------------------------------------------------------------------------------------|---------------------------------------------------------------------------------------------------------------------------------------------------------------------------------------------------------------------------------------------------------------------------------------------------------------|
| 159   |    | tulip,color,orange<br>blooms,red,spring<br>memorial,monument,statue<br>lawn,park,girl<br>gardens,trees,tree              | flowers-bed:PREP_IN<br>beds-flower:NN<br>flower-bed:DEP<br>plant-to:AUX<br>flowers-front:PREP_IN<br>bed-front:PREP_IN<br>pretty-flowers:DEP<br>bed-yard:PREP_IN<br>bed-flower:NN<br>flowers-red:AMOD<br>boxes-flower:NN<br>plant-flowers:DOBJ<br>box-flower:NN<br>flowers-pretty:AMOD<br>flowers-growing:VMOD |
| 160   |   | garden,trees,tree<br>plants,trees,tree<br>vegetables,color,people<br>statue,italy,architecture<br>shop,market,food       | root-pots:ROOT<br>pots-the:DET<br>tree-pot:PREP_IN<br>pots-flower:NN<br>root-pot:ROOT<br>plants-tomato:NN<br>pot-big:AMOD<br>plant-to:AUX<br>plants-potted:AMOD<br>pot-the:DET<br>market-fruit:NN<br>plant-pot:PREP_IN<br>pot-a:DET<br>shop-flower:NN<br>market-flower:NN                                     |
| 161   |  | runway,flight,aviation<br>track,formula,race<br>landing,aviation,flying<br>washington,seattle,art<br>british,formula,car | track-the:DET<br>lot-the:DET<br>truck-big:AMOD<br>car-blue:AMOD<br>root-cars:ROOT<br>garage-parking:NN<br>field-center:NN<br>take-off:PRT<br>lot-parking:NN<br>truck-white:AMOD<br>highway-a:DET<br>museum-vintage:AMOD<br>airplane-the:DET<br>point-vantage:NN<br>race-the:DET                               |

Continued on next page

Table1 – continued from previous page

| Index | Image                                                                               | NUS-WIDE Concepts                                                                                                           | SBU Concepts                                                                                                                                                                                                                                                                                                                         |
|-------|-------------------------------------------------------------------------------------|-----------------------------------------------------------------------------------------------------------------------------|--------------------------------------------------------------------------------------------------------------------------------------------------------------------------------------------------------------------------------------------------------------------------------------------------------------------------------------|
| 162   |    | bench,people,sitting<br>grey,architecture,urban<br>stunning,fantastic,travel<br>outside,portrait,cat<br>barn,abandoned,wood | window-bay:NN<br>look-window:DOBJ<br>root-cats:ROOT<br>cats-window:PREP_IN<br>window-bedroom:NN<br>table-breakfast:NN<br>kitty-window:PREP_IN<br>enjoying-sun:DOBJ<br>sitting-window:PREP_IN<br>seat-window:NN<br>tv-screen:NN<br>window-the:DET<br>bedroom-guest:NN<br>sitting-<br>house:PREP_IN_FRONT_OF<br>window-bedroom:PREP_IN |
| 163   |   | host,graffiti,hotel<br>mural,building,city<br>ladder,orange,cat<br>free,art,red<br>bleu,red,explore                         | cage-the:DET<br>horse-a:DET<br>dog-box:PREP_IN<br>shelter-animal:NN<br>root-workers:ROOT<br>business-a:DET<br>wall-colorful:AMOD<br>walking-street:PREP_ON<br>root-horse:ROOT<br>food-dog:NN<br>scene-typical:AMOD<br>root-buy:ROOT<br>root-stand:ROOT<br>train-station:DOBJ<br>goat-a:DET                                           |
| 164   |  | adult,blue,outdoor<br>fauna,zoo,photo<br>netherlands,light,dance<br>american,animal,eagle<br>lizard,snake,water             | root-owl:ROOT<br>guy-little:AMOD<br>birds-baby:NN<br>aquarium-the:DET<br>creature-a:DET<br>turtles-the:DET<br>rest-a:DET<br>white-yellow:CONJ_AND<br>house-tropical:AMOD<br>shell-a:DET<br>root-stuck:ROOT<br>cap-a:DET<br>root-frog:ROOT<br>tiger-the:DET<br>tiger-white:AMOD                                                       |

Continued on next page

Table1 – continued from previous page

| Index | Image                                                                               | NUS-WIDE Concepts                                                                                                    | SBU Concepts                                                                                                                                                                                                                                                                                                       |
|-------|-------------------------------------------------------------------------------------|----------------------------------------------------------------------------------------------------------------------|--------------------------------------------------------------------------------------------------------------------------------------------------------------------------------------------------------------------------------------------------------------------------------------------------------------------|
| 165   |    | shops,urban,japan<br>manhattan,traffic,buildings<br>signs,asia,japan<br>mall,shop,ontario<br>theater,neon,california | store-book:NN<br>street-shopping:NN<br>building-colorful:AMOD<br>building-market:NN<br>sign-white:AMOD<br>building-station:NN<br>train-sky:NN<br>town-china:NN<br>building-brown:AMOD<br>store-the:DET<br>store-grocery:NN<br>store-clothing:NN<br>building-interesting:AMOD<br>corner-street:NN<br>market-book:NN |
| 166   |   | france,panorama,polar<br>cute,dog,puppy<br>car,automobile,vehicle<br>cat,kitten,kitty<br>oregon,food,work            | monkey-a:DET<br>forest-monkey:NN<br>monkeys-the:DET<br>cat-garden:PREP_IN<br>monkey-sitting:VMOD<br>cat-house:PREP_IN<br>root-monkey:ROOT<br>cats-two:NUM<br>sitting-window:PREP_BY<br>tree-lemon:AMOD<br>cat-pot:PREP_IN<br>park-bird:NN<br>cat-black:AMOD<br>cats-black:AMOD<br>root-pot:ROOT                    |
| 167   |  | food,cake,cheese<br>japan,food,cute<br>rust,abstract,metal<br>party,fun,blue<br>coffee,red,mug                       | root-chocolate:ROOT<br>root-hand:ROOT<br>bowl-wooden:AMOD<br>cake-chocolate:NN<br>root-pot:ROOT<br>bowl-big:AMOD<br>plant-to:AUX<br>root-cups:ROOT<br>design-a:DET<br>cloth-table:NN<br>shell-the:DET<br>root-basket:ROOT<br>cake-cup:NN<br>blue-brown:CONJ_AND<br>ganache-chocolate:NN                            |

Continued on next page



Table1 – continued from previous page

| Index                  | Image                                                                               | NUS-WIDE Concepts                                                                                                                | SBU Concepts                                                                                                                                                                                                                                                                                              |
|------------------------|-------------------------------------------------------------------------------------|----------------------------------------------------------------------------------------------------------------------------------|-----------------------------------------------------------------------------------------------------------------------------------------------------------------------------------------------------------------------------------------------------------------------------------------------------------|
| 168                    |    | dog, animals, explore<br>dogs, funny, cute<br>horse, foals, animals<br>nose, dog, cow<br>horses, portrait, animal                | dog-black:AMOD<br>dog-cute:AMOD<br>root-puppy:ROOT<br>seat-back:AMOD<br>root-loves:ROOT<br>boy-good:AMOD<br>puppy-the:DET<br>horse-black:AMOD<br>eye-the:DET<br>dog-street:NN<br>dog-house:PREP_IN<br>root-buddy:ROOT<br>dog-brown:AMOD<br>cow-a:DET<br>face-the:DET                                      |
| 169                    |   | design, interior, furniture<br>work, office, apple<br>home, interior, design<br>room, design, home<br>interior, furniture, house | table-window:PREP_BY<br>table-kitchen:PREP_IN<br>lounge-the:DET<br>bedroom-house:PREP_OF<br>table-side:NN<br>room-living:NN<br>desk-room:PREP_IN<br>desk-office:NN<br>room-hotel:NN<br>table-dinner:NN<br>room-the:DET<br>room-house:PREP_IN<br>root-room:ROOT<br>room-living:AMOD<br>desk-office:PREP_IN |
| 170                    |  | bus, abandoned, clouds<br>road, city, people<br>metro, texas, high<br>highway, police, tollbooth<br>construction, night, clouds  | building-yellow:AMOD<br>bus-tour:NN<br>bus-school:NN<br>car-yellow:AMOD<br>root-center:ROOT<br>truck-yellow:AMOD<br>end-street:PREP_OF<br>car-street:NN<br>street-main:AMOD<br>root-club:ROOT<br>looking-building:DOBJ<br>root-train:ROOT<br>street-city:NN<br>in-front:POBJ<br>row-houses:PREP_OF        |
| Continued on next page |                                                                                     |                                                                                                                                  |                                                                                                                                                                                                                                                                                                           |

**Table1 – continued from previous page**

| Index | Image                                                                               | NUS-WIDE Concepts                                                                                                                 | SBU Concepts                                                                                                                                                                                                                                                                                                    |
|-------|-------------------------------------------------------------------------------------|-----------------------------------------------------------------------------------------------------------------------------------|-----------------------------------------------------------------------------------------------------------------------------------------------------------------------------------------------------------------------------------------------------------------------------------------------------------------|
| 171   |    | bike,motorcycle,race<br>bicycle,motion,girl<br>motorcycle,motion,asia<br>motorcycle,road,sky<br>speed,motion,bike                 | bike-road:NN<br>bicycle-a:DET<br>race-bike:NN<br>bike-front:PREP_IN<br>race-a:DET<br>race-mountain:NN<br>bike-mountain:NN<br>dog-basket:PREP_IN<br>ride-bike:DOBJ<br>ride-bike:NSUBJ<br>ride-to:AUX<br>tour-bike:NN<br>motorcycle-a:DET<br>race-cup:NN<br>race-the:DET                                          |
| 172   |   | airplane,pilot,fighter<br>runway,flight,aviation<br>landing,aviation,flying<br>canada,aircraft,airplane<br>aircraft,pilot,fighter | museum-airplane:NN<br>may-collection:NN<br>museum-vintage:AMOD<br>flying-order:DOBJ<br>may-heritage:NN<br>airplane-an:DET<br>plane-the:DET<br>position-the:DET<br>tail-the:DET<br>flying-house:DOBJ<br>root-plane:ROOT<br>air-the:DET<br>root-sculpture:ROOT<br>root-airplane:ROOT<br>machine-flying:AMOD       |
| 173   |  | wedding,dress,portrait<br>farm,animal,cow<br>cows,scotland,horns<br>groom,happy,beach<br>goat,cheese,cat                          | girl-flower:NN<br>girls-flower:NN<br>girl-wedding:PREP_IN<br>dress-wedding:NN<br>root-mum:ROOT<br>home-childhood:NN<br>dresses-white:AMOD<br>dress-fancy:AMOD<br>standing-'re:AUX<br>dressed-white:PREP_IN<br>dress-pretty:AMOD<br>ceremony-the:DET<br>root-girls:ROOT<br>root-animals:ROOT<br>dress-white:AMOD |

Continued on next page

Table1 – continued from previous page

| Index | Image                                                                               | NUS-WIDE Concepts                                                                                                  | SBU Concepts                                                                                                                                                                                                                                                                                    |
|-------|-------------------------------------------------------------------------------------|--------------------------------------------------------------------------------------------------------------------|-------------------------------------------------------------------------------------------------------------------------------------------------------------------------------------------------------------------------------------------------------------------------------------------------|
| 174   |    | ball,sport,soccer<br>running,cheering,city<br>soccer,beach,sunset<br>run,dog,fun<br>scientists,science,art         | playing-ball:DOBJ<br>play-boys:NSUBJ<br>root-children:ROOT<br>root-play:ROOT<br>man-walking:VMOD<br>game-a:DET<br>ball-the:DET<br>girl-dog:CONJ_AND<br>ball-basket:NN<br>ball-a:DET<br>horse-black:AMOD<br>root-walks:ROOT<br>root-dude:ROOT<br>horses-the:DET<br>pants-the:DET                 |
| 175   |   | horse,foals,animals<br>horses,portrait,animal<br>bride,beach,sunset<br>foals,horse,small<br>brasil,horses,horse    | root-horse:ROOT<br>horse-a:DET<br>horse-the:DET<br>horse-field:PREP_IN<br>cow-a:DET<br>horses-the:DET<br>riding-horse:DOBJ<br>root-horses:ROOT<br>horses-two:NUM<br>horse-black:AMOD<br>horse-white:AMOD<br>pony-a:DET<br>root-sculpture:ROOT<br>standing-a:DET<br>have-house:DOBJ              |
| 176   |  | pool,apartments,architecture<br>india,culture,people<br>mosque,iran,prayer<br>museum,history,war<br>china,city,red | root-pool:ROOT<br>tub-hot:AMOD<br>table-chairs:CONJ_AND<br>pool-the:DET<br>pool-swimming:AMOD<br>bag-green:AMOD<br>table-house:PREP_IN<br>middle-night:PREP_OF<br>green-a:DET<br>boy-boat:PREP_IN<br>water-green:AMOD<br>plays-boy:NSUBJ<br>one-blue:AMOD<br>root-tables:ROOT<br>table-water:NN |

Continued on next page

**Table1 – continued from previous page**

| Index                  | Image                                                                               | NUS-WIDE Concepts                                                                                        | SBU Concepts                                                                                                                                                                                                                                                                                       |
|------------------------|-------------------------------------------------------------------------------------|----------------------------------------------------------------------------------------------------------|----------------------------------------------------------------------------------------------------------------------------------------------------------------------------------------------------------------------------------------------------------------------------------------------------|
| 177                    |    | running,dog,horse<br>brazil,horses,horse<br>run,dog,fun<br>puppy,baby,animals<br>brasil,horses,horse     | ball-tennis:NN<br>play-to:AUX<br>root-dogs:ROOT<br>root-animals:ROOT<br>root-play:ROOT<br>playing-ball:DOBJ<br>having-ball:DOBJ<br>dog-brown:AMOD<br>dream-a:DET<br>field-green:PREP_OF<br>running-grass:PREP_IN<br>cute-dog:DOBJ<br>dog-street:NN<br>go-water:PREP_IN<br>cow-the:DET              |
| 178                    |   | horses,explore,animal<br>grass,cow,field<br>cow,rural,sky<br>foals,horse,mare<br>african,elephant,baby   | horse-a:DET<br>horse-black:AMOD<br>cow-field:PREP_IN<br>root-cow:ROOT<br>horse-white:AMOD<br>pasture-the:DET<br>root-horses:ROOT<br>horses-the:DET<br>cow-the:DET<br>root-horse:ROOT<br>horse-field:PREP_IN<br>horses-field:PREP_IN<br>pony-a:DET<br>horses-white:AMOD<br>cows-field:PREP_IN       |
| 179                    |  | men,male,sports<br>room,people,adults<br>self,red,bathroom<br>university,sports,sport<br>girl,blue,girls | in-office:POBJ<br>running-house:PREP_AROUND<br>house-lake:NN<br>classroom-a:DET<br>floor-kitchen:NN<br>book-a:DET<br>in-room:POBJ<br>game-a:DET<br>boys-kitchen:PREP_IN<br>room-new:AMOD<br>playing-ball:DOBJ<br>floor-room:PREP_IN<br>sitting-office:PREP_IN<br>bed-boy:NN<br>floor-house:PREP_IN |
| Continued on next page |                                                                                     |                                                                                                          |                                                                                                                                                                                                                                                                                                    |



Table1 – continued from previous page

| Index                  | Image                                                                               | NUS-WIDE Concepts                                                                                         | SBU Concepts                                                                                                                                                                                                                                                                                            |
|------------------------|-------------------------------------------------------------------------------------|-----------------------------------------------------------------------------------------------------------|---------------------------------------------------------------------------------------------------------------------------------------------------------------------------------------------------------------------------------------------------------------------------------------------------------|
| 180                    |    | aquarium,animal,animals<br>flash,macro,green<br>bird,sky,blue<br>flora,closeup,macro<br>blooms,red,spring | tank-fish:NN<br>morning-every:DET<br>time-all:PREDET<br>root-poppy:ROOT<br>neighbor-a:DET<br>cute-how:ADVMOD<br>friend-a:DET<br>mouse-a:DET<br>pink-a:DET<br>fish-aquarium:PREP_IN<br>tank-the:DET<br>sitting-pot:PREP_IN<br>spotted-garden:PREP_IN<br>feeder-the:DET<br>eye-the:DET                    |
| 181                    |   | dog,white,explore<br>puppy,baby,animals<br>pet,dog,puppy<br>pups,baby,pet<br>dogs,funny,cute              | dog-black:AMOD<br>root-puppy:ROOT<br>ball-tennis:NN<br>horse-black:AMOD<br>dogs-the:DET<br>puppy-cute:AMOD<br>root-catch:ROOT<br>one-dogs:PREP_OF<br>bowl-water:NN<br>dog-snow:PREP_IN<br>dog-street:NN<br>puppy-the:DET<br>roll-to:AUX<br>boy-good:AMOD<br>root-pepper:ROOT                            |
| 182                    |  | car,automobile,truck<br>racing,classic,cars<br>race,car,auto<br>auto,automobile,race<br>speed,racing,car  | one-cars:PREP_OF<br>show-the:DET<br>parked-street:PREP_ON<br>show-car:NSUBJ<br>root-show:ROOT<br>show-building:PREP_AT<br>root-car:ROOT<br>car-blue:AMOD<br>car-police:NN<br>parked-street:PREP_IN<br>building-britannic:AMOD<br>car-street:PREP_IN<br>car-a:DET<br>building-d70:PREP_IN<br>show-car:NN |
| Continued on next page |                                                                                     |                                                                                                           |                                                                                                                                                                                                                                                                                                         |

**Table1 – continued from previous page**

| Index                  | Image                                                                               | NUS-WIDE Concepts                                                                                                 | SBU Concepts                                                                                                                                                                                                                                                                                                                             |
|------------------------|-------------------------------------------------------------------------------------|-------------------------------------------------------------------------------------------------------------------|------------------------------------------------------------------------------------------------------------------------------------------------------------------------------------------------------------------------------------------------------------------------------------------------------------------------------------------|
| 183                    |    | stream,trees,sky<br>woods,leaves,path<br>trail,forest,trees<br>woods,landscape,sky<br>railway,bridge,steam        | bridge-little:AMOD<br>up-mountain:POBJ<br>track-the:DET<br>railway-the:DET<br>side-mountain:PREP_OF<br>forest-rain:NN<br>bridge-canyon:PREP_OVER<br>road-mountains:PREP_IN<br>falls-tree:NSUBJ<br>bridge-creek:PREP_OVER<br>bridge-forest:PREP_IN<br>root-crosses:ROOT<br>root-suspension:ROOT<br>road-mountain:NN<br>forest-mountain:NN |
| 184                    |   | bike,motorcycle,race<br>bicycle,motion,girl<br>motorcycle,road,sky<br>square,portrait,china<br>driver,white,horse | seat-bike:NN<br>bike-mountain:NN<br>bike-road:NN<br>race-bike:NN<br>dog-basket:PREP_IN<br>race-mountain:NN<br>bike-front:PREP_IN<br>ride-bike:DOBJ<br>basket-bike:NN<br>ride-bike:NSUBJ<br>motorcycle-a:DET<br>bicycle-a:DET<br>race-the:DET<br>race-cup:NN<br>wheel-the:DET                                                             |
| 185                    |  | navy,ship,water<br>military,tanks,army<br>ship,harbour,cruise<br>pacific,waves,nature<br>ships,port,boat          | ship-the:DET<br>root-ship:ROOT<br>ship-cruise:NN<br>ship-cargo:NN<br>ship-a:DET<br>bay-the:DET<br>root-ships:ROOT<br>boat-ocean:PREP_IN<br>ships-cruise:NN<br>boat-white:AMOD<br>ship-background:PREP_IN<br>view-ship:PREP_OF<br>middle-ocean:PREP_OF<br>ships-the:DET<br>ship-cruise:NSUBJ                                              |
| Continued on next page |                                                                                     |                                                                                                                   |                                                                                                                                                                                                                                                                                                                                          |

Table1 – continued from previous page

| Index | Image                                                                               | NUS-WIDE Concepts                                                                                                                  | SBU Concepts                                                                                                                                                                                                                                                                                                                         |
|-------|-------------------------------------------------------------------------------------|------------------------------------------------------------------------------------------------------------------------------------|--------------------------------------------------------------------------------------------------------------------------------------------------------------------------------------------------------------------------------------------------------------------------------------------------------------------------------------|
| 186   |    | room,design,home<br>interior,furniture,house<br>design,interior,furniture<br>modern,interior,furniture<br>home,interior,design     | room-kitchen:CONJ_AND<br>bedroom-the:DET<br>chair-lounge:NN<br>bed-room:PREP_IN<br>room-living:NN<br>root-room:ROOT<br>desk-room:PREP_IN<br>room-guest:NN<br>room-living:AMOD<br>table-room:NN<br>root-downstairs:ROOT<br>table-side:NN<br>bedroom-house:PREP_OF<br>lounge-the:DET<br>bedroom-house:PREP_IN                          |
| 187   |   | hospital,people,california<br>photos,art,photograph<br>sitting,clothing,girl<br>trip,summer,people<br>stairs,white,red             | root-boy:ROOT<br>chair-bag:NN<br>girl-baby:NN<br>boy-blue:PREP_IN<br>root-pants:ROOT<br>root-nap:ROOT<br>hospital-the:DET<br>banks-outer:NN<br>bag-sleeping:AMOD<br>towel-beach:NN<br>boy-bed:PREP_IN<br>towel-the:DET<br>girl-sitting:DEP<br>girl-boat:PREP_IN<br>girl-box:PREP_IN                                                  |
| 188   |  | studio,microphones,office<br>interior,furniture,house<br>decoration,home,room<br>home,interior,design<br>design,interior,furniture | room-house:PREP_IN<br>living-room:DOBJ<br>bedroom-new:AMOD<br>root-guest:ROOT<br>room-living:AMOD<br>bedroom-house:PREP_OF<br>house-bedroom:AMOD<br>standing-door:PREP_IN<br>fireplace-the:DET<br>standing-doorway:PREP_IN<br>root-lounge:ROOT<br>see-door:DOBJ<br>standing-way:PREP_IN<br>root-downstairs:ROOT<br>root-bedroom:ROOT |

Continued on next page

Table1 – continued from previous page

| Index                  | Image                                                                               | NUS-WIDE Concepts                                                                                              | SBU Concepts                                                                                                                                                                                                                                                                                                      |
|------------------------|-------------------------------------------------------------------------------------|----------------------------------------------------------------------------------------------------------------|-------------------------------------------------------------------------------------------------------------------------------------------------------------------------------------------------------------------------------------------------------------------------------------------------------------------|
| 189                    |    | great,nature,wings<br>white,animal,animals<br>islands,booby,bird<br>nature,bird,birds<br>save,water,macro      | bird-white:AMOD<br>heron-the:DET<br>egret-great:AMOD<br>flower-field:PREP_IN<br>root-white:ROOT<br>flowers-white:AMOD<br>root-gull:ROOT<br>flower-white:AMOD<br>gardens-royal:NN<br>kind-what:DET<br>post-a:DET<br>root-seagull:ROOT<br>tit-blue:AMOD<br>bird-beautiful:AMOD<br>heron-a:DET                       |
| 190                    |   | bicycle,track,art<br>bike,track,vintage<br>bicycle,motion,girl<br>formula,classic,sport<br>motorcycle,road,sky | bike-road:NN<br>bike-front:PREP_IN<br>bicycle-a:DET<br>dreams-places:PREP_OF<br>places-unconventionnal:AMOD<br>bike-mountain:NN<br>motorcycle-a:DET<br>bike-field:PREP_IN<br>bike-dreams:DEP<br>basket-bike:NN<br>leaning-wall:PREP_AGAINST<br>wheel-a:DET<br>seat-bike:NN<br>ride-to:AUX<br>white-black:CONJ_AND |
| 191                    |  | cat,kitten,kitty<br>adorable,funny,nature<br>sweet,pet,animal<br>lovely,cute,cat<br>rabbit,sweet,pets          | cat-orange:AMOD<br>cat-cute:AMOD<br>cat-window:PREP_IN<br>window-open:AMOD<br>likes-sit:XCOMP<br>cat-house:PREP_IN<br>lives-cat:NSUBJ<br>one-cats:PREP_OF<br>cat-box:PREP_IN<br>kitty-window:PREP_IN<br>cat-lives:RCMOD<br>root-kittens:ROOT<br>cats-the:DET<br>cats-two:NUM<br>cat-street:NN                     |
| Continued on next page |                                                                                     |                                                                                                                |                                                                                                                                                                                                                                                                                                                   |



Table1 – continued from previous page

| Index | Image                                                                               | NUS-WIDE Concepts                                                                                                   | SBU Concepts                                                                                                                                                                                                                                                                                     |
|-------|-------------------------------------------------------------------------------------|---------------------------------------------------------------------------------------------------------------------|--------------------------------------------------------------------------------------------------------------------------------------------------------------------------------------------------------------------------------------------------------------------------------------------------|
| 192   |    | sign,sky,road<br>tollbooth,scotland,street<br>sign,funny,signs<br>industry,ship,water<br>brick,wall>window          | sign-side:PREP_ON<br>painted-side:PREP_ON<br>root-sign:ROOT<br>sign-an:DET<br>sign-house:PREP_NEAR<br>sign-a:DET<br>one-signs:PREP_OF<br>sign-town:PREP_IN<br>sign-warning:AMOD<br>sign-wall:PREP_ON<br>sign-house:NN<br>sign-old:AMOD<br>spotted-sign:DOBJ<br>sign-the:DET<br>painted-sign:DOBJ |
| 193   |   | pets,cat,cats<br>kitty,orange,cats<br>horses,portrait,animal<br>illustration,commercials,red<br>cute,dog,puppy      | one-cats:PREP_OF<br>lives-cat:NSUBJ<br>dog-black:AMOD<br>cat-lives:RCMOD<br>cat-black:AMOD<br>root-met:ROOT<br>tree-cat:NN<br>house-cat:NN<br>root-catch:ROOT<br>cats-the:DET<br>cat-street:NN<br>root-goat:ROOT<br>root-shadow:ROOT<br>cat-house:PREP_IN<br>notice-n't:NEG                      |
| 194   |  | motorcycle,road,sky<br>india,culture,people<br>girls,boys,asia<br>toronto,protest,portrait<br>police,politics,peace | dress-traditional:AMOD<br>mask-a:DET<br>motorcycle-a:DET<br>root-guitar:ROOT<br>road-white:AMOD<br>guitar-a:DET<br>shoe-a:DET<br>root-bags:ROOT<br>road-pole:NN<br>man-hat:PREP_IN<br>shoe-the:DET<br>red-black:CONJ_AND<br>elephant-the:DET<br>playing-guitar:DOBJ<br>outfit-a:DET              |

Continued on next page

Table1 – continued from previous page

| Index | Image                                                                               | NUS-WIDE Concepts                                                                                                       | SBU Concepts                                                                                                                                                                                                                                                                                                                              |
|-------|-------------------------------------------------------------------------------------|-------------------------------------------------------------------------------------------------------------------------|-------------------------------------------------------------------------------------------------------------------------------------------------------------------------------------------------------------------------------------------------------------------------------------------------------------------------------------------|
| 195   |    | metro,texas,high<br>tollbooth,illinois,chicago<br>high,texas,metro<br>signs,australia,nsw<br>suburban,arizona,landscape | view-street:PREP_OF<br>sign-yellow:AMOD<br>street-house:PREP_NEAR<br>root-corner:ROOT<br>building-background:PREP_IN<br>street-city:PREP_IN<br>see-sign:DOBJ<br>root-county:ROOT<br>house-middle:PREP_IN<br>looking-road:DOBJ<br>building-green:AMOD<br>side-street:PREP_OF<br>truck-front:PREP_IN<br>direction-the:DET<br>jam-traffic:NN |
| 196   |   | tree,trunk,leaves<br>nsw,animal,flower<br>leaves,fall,tree<br>squirrel,california,funny<br>asia,thailand,diving         | monkey-tree:PREP_IN<br>spotted-tree:PREP_IN<br>climbing-tree:DOBJ<br>sitting-tree:PREP_IN<br>tree-house:PREP_AT<br>in-tree:POBJ<br>root-monkey:ROOT<br>bird-tree:PREP_IN<br>sleeping-tree:PREP_IN<br>up-tree:PREP_IN<br>bird-yellow:AMOD<br>nest-tree:PREP_IN<br>spotted-bird:DOBJ<br>high-tree:PREP_IN<br>root-monkeys:ROOT              |
| 197   |  | apple,office,mac<br>mac,leopard,display<br>office,apple,mac<br>mac,office,photography<br>display,apple,mac              | desk-new:AMOD<br>computer-the:DET<br>root-desk:ROOT<br>desk-computer:NN<br>computer-a:DET<br>desk-office:PREP_IN<br>screen-blue:AMOD<br>desk-room:PREP_IN<br>root-computer:ROOT<br>desk-office:NN<br>laptop-the:DET<br>screen-big:AMOD<br>desk-a:DET<br>monitor-the:DET<br>tv-screen:NN                                                   |

Continued on next page

Table1 – continued from previous page

| Index                  | Image                                                                               | NUS-WIDE Concepts                                                                                          | SBU Concepts                                                                                                                                                                                                                                                                                  |
|------------------------|-------------------------------------------------------------------------------------|------------------------------------------------------------------------------------------------------------|-----------------------------------------------------------------------------------------------------------------------------------------------------------------------------------------------------------------------------------------------------------------------------------------------|
| 198                    |    | kitten,fun,jump<br>eyes,cat,feline<br>cat,eyes,kitty<br>feline,kitten,cats<br>adorable,funny,nature        | one-cats:PREP_OF<br>cat-cute:AMOD<br>loves-sit:XCOMP<br>lives-cat:NSUBJ<br>watching-birds:DOBJ<br>cat-street:NN<br>taking-nap:DOBJ<br>kitty-box:PREP_IN<br>likes-sit:XCOMP<br>cat-fat:AMOD<br>box-cardboard:NN<br>sleeping-box:PREP_IN<br>hit-car:AGENT<br>cat-lives:RCMOD<br>loves-cat:NSUBJ |
| 199                    |   | cat,kitten,kitty<br>zoo,lion,mammal<br>ontario,fawn,animal<br>fox,wild,animal<br>woods,deer,wildlife       | cat-orange:AMOD<br>lion-mountain:NN<br>root-cub:ROOT<br>cat-house:NN<br>root-fox:ROOT<br>home-new:AMOD<br>cub-lion:NN<br>cat-cute:AMOD<br>cat-street:NN<br>eating-grass:DOBJ<br>one-cats:PREP_OF<br>tiger-a:DET<br>lion-a:DET<br>root-ginger:ROOT<br>animals-the:DET                          |
| 200                    |  | sheep,animal,horns<br>goat,mountain,wildlife<br>wild,deer,africa<br>horns,sheep,landscape<br>cow,rural,sky | root-sheep:ROOT<br>horse-white:AMOD<br>goat-a:DET<br>cow-field:PREP_IN<br>root-goat:ROOT<br>goat-mountain:NN<br>root-cow:ROOT<br>horse-field:PREP_IN<br>root-horse:ROOT<br>pony-a:DET<br>cow-a:DET<br>sheep-the:DET<br>sheep-field:PREP_IN<br>highlands-the:DET<br>forest-new:NN              |
| Continued on next page |                                                                                     |                                                                                                            |                                                                                                                                                                                                                                                                                               |

Table1 – continued from previous page

| Index | Image                                                                               | NUS-WIDE Concepts                                                                                                      | SBU Concepts                                                                                                                                                                                                                                                                                                            |
|-------|-------------------------------------------------------------------------------------|------------------------------------------------------------------------------------------------------------------------|-------------------------------------------------------------------------------------------------------------------------------------------------------------------------------------------------------------------------------------------------------------------------------------------------------------------------|
| 201   |    | vegetables,color,people<br>shop,market,food<br>garden,trees,tree<br>copyright,fun,pretty<br>india,culture,people       | market-local:AMOD<br>market-a:DET<br>market-an:DET<br>market-wholesale:AMOD<br>root-market:ROOT<br>root-vendor:ROOT<br>market-street:NN<br>market-there:ADV<br>market-open:AMOD<br>at-market:POBJ<br>root-produce:ROOT<br>stall-market:PREP_IN<br>sale-market:PREP_AT<br>root-food:ROOT<br>pig-the:DET                  |
| 202   |   | kitchen,interior,design<br>room,design,home<br>home,interior,design<br>design,interior,furniture<br>pottery,home,retro | cabinet-kitchen:PREP_IN<br>root-cabinet:ROOT<br>doors-cabinet:NN<br>room-living:AMOD<br>looking-room:PREP_INTO<br>shelf-kitchen:PREP_IN<br>desk-bedroom:PREP_IN<br>root-cabinets:ROOT<br>cabinets-the:DET<br>room-family:NN<br>see-door:DOBJ<br>dining-room:DOBJ<br>wall-one:NUM<br>style-the:DET<br>room-house:PREP_IN |
| 203   |  | red,black,girl<br>construction,boston,man<br>south,people,east<br>raft,fun,sea<br>protest,france,protesters            | trees-plant:NN<br>boys-tree:PREP_IN<br>up-mountain:POBJ<br>root-pants:ROOT<br>plant-tree:DOBJ<br>boy-tree:PREP_IN<br>girl-tree:PREP_IN<br>nursery-tree:NN<br>person-the:DET<br>rafting-white:AMOD<br>water-white:NN<br>fence-backyard:PREP_IN<br>garden-the:DET<br>forest-green:AMOD<br>shirt-orange:AMOD               |

Continued on next page



Table1 – continued from previous page

| Index | Image                                                                               | NUS-WIDE Concepts                                                                                                       | SBU Concepts                                                                                                                                                                                                                                                                             |
|-------|-------------------------------------------------------------------------------------|-------------------------------------------------------------------------------------------------------------------------|------------------------------------------------------------------------------------------------------------------------------------------------------------------------------------------------------------------------------------------------------------------------------------------|
| 204   |    | jeep,sky,blue<br>kuwait,car,cars<br>roadblock,water,tree<br>trip,summer,people<br>police,car,cars                       | root-trucks:ROOT<br>root-truck:ROOT<br>truck-the:DET<br>stuck-sand:PREP_IN<br>car-field:PREP_IN<br>truck-white:AMOD<br>cars-trucks:CONJ_AND<br>root-car:ROOT<br>root-van:ROOT<br>car-white:AMOD<br>car-rental:AMOD<br>lot-parking:NN<br>truck-a:DET<br>accident-car:NN<br>trucks-the:DET |
| 205   |   | warehouse,girl,fashion<br>house,home,interior<br>coffee,man,apple<br>museum,history,war<br>bus,people,england           | film-white:AMOD<br>phone-a:DET<br>root-guitar:ROOT<br>playing-guitar:DOBJ<br>guitar-the:DET<br>root-man:ROOT<br>guitar-a:DET<br>me-mirror:PREP_IN<br>film-black:AMOD<br>mirrors-the:DET<br>coat-the:DET<br>black-white:DEP<br>window-store:NN<br>light-candle:NN<br>root-machine:ROOT    |
| 206   |  | horse,argentina,field<br>seaside,england,summer<br>mural,building,city<br>texas,war,field<br>helicopters,canada,toronto | horses-the:DET<br>machine-an:DET<br>cow-the:DET<br>road-back:AMOD<br>horse-the:DET<br>pasture-a:DET<br>root-graffiti:ROOT<br>bus-school:NN<br>standing-a:DET<br>horse-white:AMOD<br>horse-a:DET<br>root-wheel:ROOT<br>root-sculpture:ROOT<br>park-car:NN<br>side-the:DET                 |

Continued on next page

Table1 – continued from previous page

| Index                  | Image                                                                               | NUS-WIDE Concepts                                                                                                              | SBU Concepts                                                                                                                                                                                                                                                                                                    |
|------------------------|-------------------------------------------------------------------------------------|--------------------------------------------------------------------------------------------------------------------------------|-----------------------------------------------------------------------------------------------------------------------------------------------------------------------------------------------------------------------------------------------------------------------------------------------------------------|
| 207                    |    | protesters,london,politics<br>downtown,people,street<br>prison,orange,woman<br>driver,portrait,people<br>holiday,christmas,fun | hat-black:AMOD<br>man-hat:PREP_IN<br>root-man:ROOT<br>girl-mirror:PREP_IN<br>guitar-the:DET<br>girl-train:PREP_IN<br>van-60mm:NUM<br>dressed-black:PREP_IN<br>mask-a:DET<br>face-to:AUX<br>root-guy:ROOT<br>shirt-red:AMOD<br>shirt-black:AMOD<br>girl-black:AMOD<br>girl-red:PREP_IN                           |
| 208                    |   | boats,sunset,sun<br>boat,sunset,sun<br>barge,sunset,sky<br>sea,boat,ship<br>sailboat,reflection,clouds                         | boats-fishing:NN<br>sky-water:CONJ_AND<br>boats-small:AMOD<br>sunset-a:DET<br>root-harbor:ROOT<br>lake-house:PREP_BY<br>root-sunset:ROOT<br>house-boat:NN<br>taken-beach:PREP_FROM<br>sun-setting:NN<br>boat-lake:PREP_IN<br>fishing-boats:DOBJ<br>boats-wooden:AMOD<br>boat-lake:PREP_ON<br>root-sailboat:ROOT |
| 209                    |  | station,subway,metro<br>train,tracks,light<br>bus,light,lights<br>locomotive,bridge,track<br>night,street,traffic              | train-a:DET<br>station-street:NN<br>passes-train:NSUBJ<br>station-railway:NN<br>train-car:NN<br>root-station:ROOT<br>waiting-train:PREP_FOR<br>car-train:NN<br>station-the:DET<br>train-an:DET<br>train-line:NN<br>station-central:NN<br>root-train:ROOT<br>crosses-train:NSUBJ<br>metro-the:DET                |
| Continued on next page |                                                                                     |                                                                                                                                |                                                                                                                                                                                                                                                                                                                 |

**Table1 – continued from previous page**

| Index | Image                                                                               | NUS-WIDE Concepts                                                                                            | SBU Concepts                                                                                                                                                                                                                                                                                                 |
|-------|-------------------------------------------------------------------------------------|--------------------------------------------------------------------------------------------------------------|--------------------------------------------------------------------------------------------------------------------------------------------------------------------------------------------------------------------------------------------------------------------------------------------------------------|
| 210   |    | auto,automobile,race<br>automobile,ontario,speed<br>sport,race,car<br>vehicle,cars,speed<br>speed,racing,car | parked-street:PREP_ON<br>spotted-car:NSUBJ<br>parked-car:NSUBJ<br>parked-street:PREP_IN<br>car-classic:AMOD<br>car-street:PREP_IN<br>one-cars:PREP_OF<br>car-green:AMOD<br>warehouse-brick:NN<br>show-car:NN<br>root-car:ROOT<br>car-toy:NN<br>car-vintage:AMOD<br>car-street:PREP_ON<br>car-new:AMOD        |
| 211   |   | roadblock,water,tree<br>shade,leaves,trees<br>june,world,france<br>small,sky,water<br>cow,dog,japan          | crossing-road:DOBJ<br>root-wash:ROOT<br>root-cow:ROOT<br>kingdom-animal:NN<br>root-person:ROOT<br>mai-chiang:NN<br>shade-tree:PREP_OF<br>elephant-an:DET<br>cow-the:DET<br>statue-massive:AMOD<br>locals-the:DET<br>cow-a:DET<br>walking-street:DOBJ<br>root-walks:ROOT<br>road-the:DET                      |
| 212   |  | puppy,baby,animals<br>bunny,white,pups<br>rabbit,sweet,pets<br>dogs,white,cute<br>pups,yellow,pet            | root-doggy:ROOT<br>dog-house:PREP_IN<br>cute-being:COP<br>dog-cute:AMOD<br>root-sleeps:ROOT<br>brought-home:DOBJ<br>bathtub-the:DET<br>puppy-cute:AMOD<br>put-box:PREP_IN<br>root-loves:ROOT<br>doggy-window:PREP_IN<br>shelter-animal:NN<br>running-house:PREP_AROUND<br>root-puppy:ROOT<br>root-buddy:ROOT |

Continued on next page

Table1 – continued from previous page

| Index | Image                                                                               | NUS-WIDE Concepts                                                                                                       | SBU Concepts                                                                                                                                                                                                                                                                                          |
|-------|-------------------------------------------------------------------------------------|-------------------------------------------------------------------------------------------------------------------------|-------------------------------------------------------------------------------------------------------------------------------------------------------------------------------------------------------------------------------------------------------------------------------------------------------|
| 213   |    | station,subway,metro<br>railing,night,sunset<br>cars,night,light<br>rail,station,night<br>long,car,road                 | train-an:DET<br>under-bridge:POBJ<br>root-train:ROOT<br>train-the:DET<br>bridge-brooklyn:NN<br>passes-train:NSUBJ<br>cross-bridge:NSUBJ<br>home-train:NN<br>train-a:DET<br>bridge-road:NN<br>train-passenger:NN<br>goes-bridge:NSUBJ<br>bridge-bridge:CONJ_AND<br>train-line:NN<br>station-a:DET      |
| 214   |   | forest,water,stream<br>america,animal,nature<br>sand,nature,desert<br>motorcycle,road,sky<br>north,green,england        | bike-front:PREP_IN<br>root-statue:ROOT<br>on-road:POBJ<br>motorcycle-a:DET<br>seat-bike:NN<br>sculpture-a:DET<br>park-ocean:NN<br>body-the:DET<br>bicycle-a:DET<br>blue-a:DET<br>ride-bike:DOBJ<br>park-oak:NN<br>trip-bike:NN<br>take-photo:DOBJ<br>shade-tree:PREP_OF                               |
| 215   |  | president,america,party<br>democrat,election,florida<br>morning,people,coffee<br>center,beach,politics<br>small,big,man | shirt-white:AMOD<br>me-shirt:PREP_IN<br>boys-kitchen:PREP_IN<br>sitting-desk:PREP_AT<br>root-kate:ROOT<br>in-shirt:POBJ<br>me-house:PREP_IN<br>person-one:NUM<br>at-bar:POBJ<br>glass-wine:PREP_OF<br>wearing-shirt:DOBJ<br>girls-kitchen:PREP_IN<br>sign-to:AUX<br>shirt-blue:AMOD<br>shirt-dress:NN |

Continued on next page



**Table1 – continued from previous page**

| Index                  | Image                                                                               | NUS-WIDE Concepts                                                                                                 | SBU Concepts                                                                                                                                                                                                                                                                                  |
|------------------------|-------------------------------------------------------------------------------------|-------------------------------------------------------------------------------------------------------------------|-----------------------------------------------------------------------------------------------------------------------------------------------------------------------------------------------------------------------------------------------------------------------------------------------|
| 216                    |    | cats,kitten,pets<br>cat,kitten,kitty<br>soft,animal,pet<br>adorable,rabbit,bunny<br>feline,kitten,animals         | root-cats:ROOT<br>cats-two:NUM<br>cat-kitchen:PREP_IN<br>cat-white:AMOD<br>cat-cute:AMOD<br>sleeping-sun:PREP_IN<br>nap-a:DET<br>loves-cat:NSUBJ<br>cat-white:PREP_IN<br>cat-black:AMOD<br>cats-the:DET<br>cat-lives:RCMOD<br>pillow-the:DET<br>cat-street:NN<br>root-black:ROOT              |
| 217                    |   | concert,cheering,metal<br>ladder,orange,cat<br>scientists,science,art<br>tour,live,music<br>shopping,night,street | stage-the:DET<br>root-band:ROOT<br>display-the:DET<br>woman-the:DET<br>screen-tv:NN<br>boys-girls:CONJ_AND<br>show-the:DET<br>display-window:NSUBJ<br>people-the:DET<br>dance-the:DET<br>root-challenge:ROOT<br>parade-the:DET<br>seat-best:AMOD<br>floor-dance:NN<br>root-game:ROOT          |
| 218                    |  | adorable,rabbit,bunny<br>cat,kitten,kitty<br>kitty,white,cats<br>kitten,white,animals<br>cats,kitten,pets         | taking-nap:DOBJ<br>root-sleeps:ROOT<br>cat-fat:AMOD<br>cat-lives:RCMOD<br>cat-white:AMOD<br>sleeping-window:PREP_IN<br>root-buddy:ROOT<br>cat-house:PREP_IN<br>desk-computer:NN<br>root-doggy:ROOT<br>nap-a:DET<br>lives-cat:NSUBJ<br>cat-cute:AMOD<br>loves-cat:NSUBJ<br>old-months:NPADVMOD |
| Continued on next page |                                                                                     |                                                                                                                   |                                                                                                                                                                                                                                                                                               |

Table1 – continued from previous page

| Index                  | Image                                                                               | NUS-WIDE Concepts                                                                                                          | SBU Concepts                                                                                                                                                                                                                                                                                                                    |
|------------------------|-------------------------------------------------------------------------------------|----------------------------------------------------------------------------------------------------------------------------|---------------------------------------------------------------------------------------------------------------------------------------------------------------------------------------------------------------------------------------------------------------------------------------------------------------------------------|
| 219                    |    | hawk,zoo,closeup<br>bird,eagle,zoo<br>american,animal,eagle<br>adult,bird,birds<br>head,cat,zoo                            | guy-little:AMOD<br>bird-sitting:VMOD<br>one-birds:PREP_OF<br>sitting-fence:PREP_ON<br>spotted-bird:DOBJ<br>sparrow-a:DET<br>park-wildlife:NN<br>bird-beautiful:AMOD<br>flew-bird:NSUBJ<br>feeders-bird:NN<br>bird-large:AMOD<br>feathers-the:DET<br>head-a:DET<br>bird-the:DET<br>hawk-a:DET                                    |
| 220                    |   | mosque,pakistan,spain<br>history,city,heritage<br>door,architecture,stone<br>islam,arch,culture<br>tourist,temple,portugal | door-main:AMOD<br>columns-the:DET<br>root-entrance:ROOT<br>house-court:NN<br>city-old:NN<br>door-building:PREP_OF<br>marble-white:AMOD<br>door-entrance:NN<br>building-random:AMOD<br>window-door:PREP_ABOVE<br>building-area:PREP_IN<br>building-library:NN<br>root-door:ROOT<br>sign-door:PREP_OVER<br>built-church:NSUBJPASS |
| 221                    |  | couple,street,kiss<br>sitting,street,man<br>waiting,train,city<br>guard,car,nature<br>silhouette,shadow,reflection         | waiting-train:PREP_FOR<br>standing-man:NN<br>root-man:ROOT<br>statue-the:DET<br>girl-coat:PREP_IN<br>woman-walking:VMOD<br>standing-front:PREP_IN<br>root-idea:ROOT<br>root-workers:ROOT<br>shot-candid:AMOD<br>root-father:ROOT<br>standing-way:PREP_IN<br>center-convention:NN<br>sitting-bench:PREP_ON<br>airport-the:DET    |
| Continued on next page |                                                                                     |                                                                                                                            |                                                                                                                                                                                                                                                                                                                                 |

Table1 – continued from previous page

| Index                  | Image                                                                               | NUS-WIDE Concepts                                                                                                      | SBU Concepts                                                                                                                                                                                                                                                                                                 |
|------------------------|-------------------------------------------------------------------------------------|------------------------------------------------------------------------------------------------------------------------|--------------------------------------------------------------------------------------------------------------------------------------------------------------------------------------------------------------------------------------------------------------------------------------------------------------|
| 222                    |    | bus,abandoned,clouds<br>auto,truck,canada<br>vehicle,abandoned,rust<br>driver,cars,auto<br>automobile,truck,california | van-a:DET<br>truck-fire:NN<br>bus-school:NN<br>car-street:NN<br>buses-the:DET<br>root-travel:ROOT<br>station-bus:NN<br>train-road:NN<br>truck-red:AMOD<br>truck-blue:AMOD<br>car-sitting:VMOD<br>museum-railroad:NN<br>root-van:ROOT<br>truck-a:DET<br>car-little:AMOD                                       |
| 223                    |   | run,dog,fun<br>running,dog,horse<br>foals,horse,mare<br>horses,explore,animal<br>shooting,rifles,war                   | horse-black:AMOD<br>girl-dog:CONJ_AND<br>dog-black:AMOD<br>ball-tennis:NN<br>root-dogs:ROOT<br>standing-field:PREP_IN<br>running-field:PREP_IN<br>horse-a:DET<br>cow-a:DET<br>boy-dog:CONJ_AND<br>walking-field:PREP_IN<br>horses-the:DET<br>walking-dogs:DOBJ<br>field-the:DET<br>horse-the:DET             |
| 224                    |  | scenery,animals,animal<br>canyon,waterfall,river<br>stream,light,night<br>perfect,great,art<br>waterfall,fall,park     | bridge-rock:NN<br>rock-river:PREP_IN<br>pools-the:DET<br>standing-rock:PREP_ON<br>runs-water:NSUBJ<br>feature-water:NN<br>middle-river:PREP_OF<br>stream-mountain:NN<br>rocks-river:PREP_IN<br>bath-bird:NN<br>water-cold:AMOD<br>fountain-a:DET<br>pool-water:PREP_OF<br>bridge-natural:AMOD<br>drink-a:DET |
| Continued on next page |                                                                                     |                                                                                                                        |                                                                                                                                                                                                                                                                                                              |

Table1 – continued from previous page

| Index | Image                                                                               | NUS-WIDE Concepts                                                                                                             | SBU Concepts                                                                                                                                                                                                                                                                           |
|-------|-------------------------------------------------------------------------------------|-------------------------------------------------------------------------------------------------------------------------------|----------------------------------------------------------------------------------------------------------------------------------------------------------------------------------------------------------------------------------------------------------------------------------------|
| 225   |    | vehicle,abandoned,rust<br>truck,tanker,massachusetts<br>bus,abandoned,clouds<br>rust,truck,car<br>automobile,truck,california | truck-old:AMOD<br>root-truck:ROOT<br>car-old:AMOD<br>car-an:DET<br>truck-an:DET<br>truck-water:NN<br>root-van:ROOT<br>car-abandoned:AMOD<br>cars-old:AMOD<br>parked-truck:NSUBJ<br>car-sitting:VMOD<br>root-stuck:ROOT<br>car-front:PREP_IN<br>root-trucks:ROOT<br>truck-field:PREP_IN |
| 226   |   | small,animal,pet<br>cat,kitten,kitty<br>rabbit,sweet,pets<br>pets,cat,cats<br>adorable,funny,nature                           | cat-box:PREP_IN<br>box-a:DET<br>box-shoe:NN<br>cat-black:AMOD<br>sitting-box:PREP_IN<br>cats-black:AMOD<br>root-finds:ROOT<br>basket-laundry:NN<br>cat-bag:PREP_IN<br>likes-sit:XCOMP<br>sleeping-box:PREP_IN<br>put-box:PREP_IN<br>box-cat:NN<br>lives-cat:NSUBJ<br>cat-lives:RCMOD   |
| 227   |  | racing,classic,cars<br>race,car,auto<br>car,automobile,truck<br>automobile,truck,california<br>vintage,car,classic            | truck-ford:NN<br>plate-license:NN<br>one-cars:PREP_OF<br>root-car:ROOT<br>spotted-car:NSUBJ<br>truck-pickup:NN<br>truck-blue:AMOD<br>hood-the:DET<br>cars-many:AMOD<br>parked-car:NSUBJ<br>car-street:PREP_IN<br>car-a:DET<br>car-field:PREP_IN<br>parked-street:PREP_IN<br>show-a:DET |

Continued on next page



Table1 – continued from previous page

| Index | Image                                                                               | NUS-WIDE Concepts                                                                                                               | SBU Concepts                                                                                                                                                                                                                                                                                               |
|-------|-------------------------------------------------------------------------------------|---------------------------------------------------------------------------------------------------------------------------------|------------------------------------------------------------------------------------------------------------------------------------------------------------------------------------------------------------------------------------------------------------------------------------------------------------|
| 228   |    | abandoned,house,rural<br>farm,barn,abandoned<br>old,sky,clouds<br>cabin,old,abandoned<br>fence,winter,snow                      | abandoned-house:DOBJ<br>barn-old:AMOD<br>house-forest:PREP_IN<br>house-an:DET<br>tracks-railroad:NN<br>road-county:PREP_IN<br>house-old:AMOD<br>road-country:NN<br>house-hill:PREP_IN<br>house-stone:NN<br>house-a:DET<br>house-hill:PREP_ON<br>house-pump:NN<br>house-road:PREP_ON<br>covered-house:NSUBJ |
| 229   |   | auto,automobile,race<br>race,car,auto<br>car,automobile,truck<br>automobile,ontario,speed<br>classic,automobile,red             | root-show:ROOT<br>show-car:NSUBJ<br>car-classic:AMOD<br>building-d70:PREP_IN<br>parked-street:PREP_ON<br>show-car:NN<br>show-building:PREP_AT<br>building-britannic:AMOD<br>one-cars:PREP_OF<br>car-the:DET<br>show-a:DET<br>warehouse-brick:NN<br>root-car:ROOT<br>parked-street:PREP_IN<br>car-a:DET     |
| 230   |  | band,portrait,live<br>bike,motorcycle,blue<br>microphones,studio,california<br>ties,glasses,band<br>democrat,washington,florida | reading-book:DOBJ<br>guitar-a:DET<br>basket-bike:NN<br>root-guitar:ROOT<br>sleeping-man:NN<br>books-the:DET<br>vendor-street:NN<br>guitar-the:DET<br>seat-driver:POSS<br>machine-flying:AMOD<br>seat-front:AMOD<br>computer-the:DET<br>bus-city:NN<br>seat-bike:NN<br>cars-the:DET                         |

Continued on next page

Table1 – continued from previous page

| Index | Image                                                                               | NUS-WIDE Concepts                                                                                            | SBU Concepts                                                                                                                                                                                                                                                                                   |
|-------|-------------------------------------------------------------------------------------|--------------------------------------------------------------------------------------------------------------|------------------------------------------------------------------------------------------------------------------------------------------------------------------------------------------------------------------------------------------------------------------------------------------------|
| 231   |    | dogs,funny,cute<br>rabbit,sweet,pets<br>funny,cute,nature<br>cute,dog,puppy<br>dog,animals,explore           | root-cats:ROOT<br>root-sleeps:ROOT<br>chair-computer:NN<br>desk-computer:NN<br>chair-office:PREP_IN<br>cat-fat:AMOD<br>puppy-cute:AMOD<br>dog-house:PREP_IN<br>room-family:NN<br>chair-lounge:NN<br>bedroom-the:DET<br>at-home:DEP<br>root-puppy:ROOT<br>dog-brown:AMOD<br>fireplace-the:DET   |
| 232   |   | racing,cars,classic<br>race,car,auto<br>car,racing,race<br>formula,historic,classic<br>racing,classic,cars   | truck-red:AMOD<br>show-car:NN<br>car-red:AMOD<br>spotted-car:NSUBJ<br>warehouse-brick:NN<br>root-cars:ROOT<br>parked-car:NSUBJ<br>dog-truck:PREP_IN<br>car-toy:NN<br>car-yellow:AMOD<br>car-french:AMOD<br>warehouse-red:AMOD<br>truck-pickup:NN<br>held-warehouse:PREP_IN<br>show-a:DET       |
| 233   |  | cables,building,apple<br>rainy,umbrella,people<br>small,big,man<br>adventure,river,trip<br>engine,art,nature | plant-window:PREP_IN<br>sill-window:NN<br>sill-the:DET<br>flowers-window:PREP_IN<br>glass-window:PREP_IN<br>window-kitchen:NN<br>plant-potted:AMOD<br>friend-a:DET<br>root-plant:ROOT<br>in-window:POBJ<br>window-front:AMOD<br>city-new:NN<br>vase-a:DET<br>tree-little:AMOD<br>pot-flower:NN |

Continued on next page

Table1 – continued from previous page

| Index                  | Image                                                                               | NUS-WIDE Concepts                                                                                                      | SBU Concepts                                                                                                                                                                                                                                                                             |
|------------------------|-------------------------------------------------------------------------------------|------------------------------------------------------------------------------------------------------------------------|------------------------------------------------------------------------------------------------------------------------------------------------------------------------------------------------------------------------------------------------------------------------------------------|
| 234                    |    | bike,motorcycle,race<br>motorcycle,motion,asia<br>motorcycle,road,sky<br>parade,school,old<br>roadblock,protest,london | motorcycle-a:DET<br>ride-bike:DOBJ<br>ride-to:AUX<br>bike-front:PREP_IN<br>bicycle-a:DET<br>kid-shirt:PREP_IN<br>street-busy:AMOD<br>root-ride:ROOT<br>people-many:AMOD<br>race-a:DET<br>man-an:DET<br>road-busy:AMOD<br>ride-bike:NSUBJ<br>guy-the:DET<br>tour-bike:NN                  |
| 235                    |   | car,automobile,truck<br>race,car,auto<br>auto,automobile,race<br>driver,cars,auto<br>racing,driver,united              | plate-license:NN<br>park-car:NN<br>car-police:NN<br>parked-car:NSUBJ<br>car-white:AMOD<br>lot-parking:NN<br>window-rear:AMOD<br>has-car:NSUBJ<br>see-car:DOBJ<br>root-car:ROOT<br>parked-car:NSUBJPASS<br>car-a:DET<br>car-new:AMOD<br>spotted-car:NSUBJ<br>car-parked:VMOD              |
| 236                    |  | hawk,red,georgia<br>reptile,tortoise,wildlife<br>bird,tree,hawk<br>american,animal,eagle<br>head,macro,wow             | sanctuary-bird:NN<br>feathers-the:DET<br>one-birds:PREP_OF<br>sitting-fence:PREP_ON<br>birds-baby:NN<br>cage-bird:NN<br>bird-an:DET<br>sitting-bird:NSUBJ<br>bird-sitting:VMOD<br>caught-bird:DOBJ<br>bird-large:AMOD<br>root-adult:ROOT<br>hawk-a:DET<br>woodpecker-a:DET<br>head-a:DET |
| Continued on next page |                                                                                     |                                                                                                                        |                                                                                                                                                                                                                                                                                          |

Table1 – continued from previous page

| Index | Image                                                                               | NUS-WIDE Concepts                                                                                             | SBU Concepts                                                                                                                                                                                                                                                                                      |
|-------|-------------------------------------------------------------------------------------|---------------------------------------------------------------------------------------------------------------|---------------------------------------------------------------------------------------------------------------------------------------------------------------------------------------------------------------------------------------------------------------------------------------------------|
| 237   |    | eye,cat,reflection<br>bird,tree,hawk<br>head,cat,zoo<br>adult,blue,outdoor<br>bird,sky,blue                   | birds-the:DET<br>bird-the:DET<br>bird-window:PREP_IN<br>black-red:CONJ_AND<br>took-photos:DOBJ<br>root-eye:ROOT<br>sitting-fence:PREP_ON<br>florida-orlando:NN<br>one-birds:PREP_OF<br>root-study:ROOT<br>root-poppy:ROOT<br>mask-a:DET<br>size-large:AMOD<br>root-loves:ROOT<br>root-parrot:ROOT |
| 238   |   | kitty,orange,cats<br>cats,kitten,pets<br>play,dog,dogs<br>rodent,nature,squirrel<br>feline,kitten,animals     | puppy-the:DET<br>root-puppy:ROOT<br>root-dogs:ROOT<br>dogs-two:NUM<br>house-dog:NN<br>root-sleeps:ROOT<br>puppy-a:DET<br>dog-box:PREP_IN<br>cats-the:DET<br>dog-street:NN<br>dog-house:PREP_IN<br>root-buddy:ROOT<br>bag-sleeping:AMOD<br>pillow-the:DET<br>puppy-cute:AMOD                       |
| 239   |  | plants,trees,tree<br>vegetables,macro,plants<br>flowers,white,rose<br>craft,handmade,dress<br>long,white,hair | root-plants:ROOT<br>plant-pot:PREP_IN<br>root-plant:ROOT<br>box-window:NN<br>plants-tomato:NN<br>plant-tomato:NN<br>plants-potted:AMOD<br>pot-a:DET<br>plants-pots:PREP_IN<br>tree-pot:PREP_IN<br>pot-plant:NN<br>pot-flower:NN<br>plants-the:DET<br>plant-house:PREP_IN<br>sill-window:NN        |

Continued on next page



Table1 – continued from previous page

| Index | Image                                                                               | NUS-WIDE Concepts                                                                                                          | SBU Concepts                                                                                                                                                                                                                                                                                          |
|-------|-------------------------------------------------------------------------------------|----------------------------------------------------------------------------------------------------------------------------|-------------------------------------------------------------------------------------------------------------------------------------------------------------------------------------------------------------------------------------------------------------------------------------------------------|
| 240   |    | baby,nature,wildlife<br>colorado,vacation,aircraft<br>pacific,bay,island<br>greece,white,art<br>valley,water,river         | cat-black:AMOD<br>seed-bird:NN<br>cats-black:AMOD<br>puddle-a:DET<br>lion-mountain:NN<br>hole-a:DET<br>cat-garden:PREP_IN<br>farm-tuscumbia:PREP_IN<br>chickens-the:DET<br>shadow-the:DET<br>trip-field:NN<br>formation-a:DET<br>root-stones:ROOT<br>sitting-garden:PREP_IN<br>root-shadow:ROOT       |
| 241   |   | united,politics,democrat<br>individual,person,people<br>traditional,asian,beauty<br>faces,portrait,woman<br>tent,magic,war | boy-hat:PREP_IN<br>man-hat:PREP_IN<br>hat-black:AMOD<br>girls-hats:PREP_IN<br>hat-straw:NN<br>dress-traditional:AMOD<br>shirt-hat:CONJ_AND<br>cute-hat:PREP_IN<br>portrait-man:PREP_OF<br>root-holds:ROOT<br>root-boy:ROOT<br>girl-young:AMOD<br>hat-cowboy:NN<br>girl-local:AMOD<br>root-mark:ROOT   |
| 242   |  | chairs,interior,office<br>chairs,beach,sky<br>floor>window,interior<br>vintage,sky,explore<br>barn,abandoned,wood          | chair-lounge:NN<br>chairs-the:DET<br>table-chairs:CONJ_AND<br>move-to:AUX<br>room-family:NN<br>root-guest:ROOT<br>root-chairs:ROOT<br>boat-house:NN<br>room-house:PREP_IN<br>sliding-doors:DOBJ<br>chair-beach:NN<br>barn-the:DET<br>root-balcony:ROOT<br>tables-chairs:CONJ_AND<br>sliding-door:DOBJ |

Continued on next page

Table1 – continued from previous page

| Index | Image                                                                               | NUS-WIDE Concepts                                                                                                                                    | SBU Concepts                                                                                                                                                                                                                                                                                                                     |
|-------|-------------------------------------------------------------------------------------|------------------------------------------------------------------------------------------------------------------------------------------------------|----------------------------------------------------------------------------------------------------------------------------------------------------------------------------------------------------------------------------------------------------------------------------------------------------------------------------------|
| 243   |    | judge,cat,little<br>country,handmade,crafts<br>scotland,architecture,festival<br>individual,person,people<br>natural,trees,tree                      | me-house:PREP_IN<br>cute-hat:PREP_IN<br>me-dress:PREP_IN<br>party-house:NN<br>shirt-a:DET<br>banks-outer:NN<br>picture-me:PREP_OF<br>chair-green:AMOD<br>hat-monkey:NN<br>sitting-floor:PREP_ON<br>girl-birthday:NN<br>boy-hat:PREP_IN<br>boy-birthday:NN<br>me-shirt:PREP_IN<br>hat-paper:NN                                    |
| 244   |   | tent,magic,war<br>fisheye,portrait,closeup<br>police,politics,peace<br>friend,dog,face<br>officers,ceremony,seattle                                  | trailer-the:DET<br>dog-bag:PREP_IN<br>basket-bike:NN<br>machine-green:AMOD<br>parade-the:DET<br>girl-old:AMOD<br>dog-basket:PREP_IN<br>seat-bike:NN<br>root-coach:ROOT<br>mask-a:DET<br>basket-a:DET<br>think-looks:CCOMP<br>go-home:DOBJ<br>root-carry:ROOT<br>wait-n't:NEG                                                     |
| 245   |  | house,architecture,historic<br>houses,building,historic<br>abandoned,house,rural<br>maryland,architecture,buildings<br>illinois,chicago,architecture | house-oldest:AMOD<br>built-house:NSUBJ<br>house-black:AMOD<br>down-street:POBJ<br>building-little:AMOD<br>window-top:AMOD<br>shot-house:PREP_OF<br>cute-house:DOBJ<br>standing-still:ADVMOD<br>house-town:PREP_IN<br>building-small:AMOD<br>house-an:DET<br>house-street:PREP_ACROSS<br>house-beach:PREP_BY<br>looks-house:NSUBJ |

Continued on next page

**Table1 – continued from previous page**

| Index                  | Image                                                                               | NUS-WIDE Concepts                                                                                         | SBU Concepts                                                                                                                                                                                                                                                                                         |
|------------------------|-------------------------------------------------------------------------------------|-----------------------------------------------------------------------------------------------------------|------------------------------------------------------------------------------------------------------------------------------------------------------------------------------------------------------------------------------------------------------------------------------------------------------|
| 246                    |    | dogs,funny,cute<br>bathroom,portrait,self<br>deer,handmade,cute<br>dog,animals,explore<br>fawn,dog,puppy  | table-kitchen:NN<br>chair-pink:AMOD<br>root-nap:ROOT<br>root-grace:ROOT<br>cute-dress:PREP_IN<br>running-house:PREP_AROUND<br>girl-little:AMOD<br>dress-pink:AMOD<br>skirt-the:DET<br>root-finds:ROOT<br>dress-the:DET<br>girls-the:DET<br>pink-pretty:ADVMOD<br>chair-room:PREP_IN<br>in-dress:POBJ |
| 247                    |   | baby,beautiful,girls<br>family,girls,beauty<br>party,politics,america<br>smile,asia,boy<br>funny,cute,cat | cute-hat:PREP_IN<br>boy-mirror:PREP_IN<br>boy-birthday:NN<br>hat-cute:AMOD<br>playing-house:PREP_IN<br>trip-field:NN<br>looked-cute:ACOMP<br>girls-little:AMOD<br>chair-girl:NN<br>girl-sweet:AMOD<br>kids-the:DET<br>girl-big:AMOD<br>boy-hat:PREP_IN<br>girl-chair:PREP_IN<br>boy-big:AMOD         |
| 248                    |  | apple,mac,black<br>mac,black,music<br>phone,maps,camera<br>maps,phone,design<br>funny,sign,japan          | root-computer:ROOT<br>root-machine:ROOT<br>computer-the:DET<br>screen-the:DET<br>computer-a:DET<br>root-screen:ROOT<br>machine-a:DET<br>machine-old:AMOD<br>book-library:PREP_IN<br>box-newspaper:NN<br>keyboard-the:DET<br>book-an:DET<br>posted-sign:NSUBJ<br>machine-the:DET<br>box-little:AMOD   |
| Continued on next page |                                                                                     |                                                                                                           |                                                                                                                                                                                                                                                                                                      |

**Table1 – continued from previous page**

| Index                  | Image                                                                               | NUS-WIDE Concepts                                                                                                   | SBU Concepts                                                                                                                                                                                                                                                                                        |
|------------------------|-------------------------------------------------------------------------------------|---------------------------------------------------------------------------------------------------------------------|-----------------------------------------------------------------------------------------------------------------------------------------------------------------------------------------------------------------------------------------------------------------------------------------------------|
| 249                    |    | track,formula,race<br>driver,cars,auto<br>formula,historic,classic<br>jeep,sky,blue<br>motorcycle,road,sky          | car-blue:AMOD<br>root-car:ROOT<br>root-truck:ROOT<br>parked-car:NSUBJ<br>lot-parking:NN<br>root-trucks:ROOT<br>root-cars:ROOT<br>cars-two:NUM<br>truck-white:AMOD<br>car-field:PREP_IN<br>car-yellow:AMOD<br>truck-big:AMOD<br>car-black:AMOD<br>car-white:AMOD<br>highway-the:DET                  |
| 250                    |   | bike,motorcycle,race<br>bicycle,motion,girl<br>motorcycle,motion,asia<br>bicycle,china,color<br>motorcycle,road,sky | bike-front:PREP_IN<br>ride-bike:NSUBJ<br>root-ride:ROOT<br>bicycle-a:DET<br>bike-road:NN<br>bike-mountain:NN<br>dog-basket:PREP_IN<br>ride-to:AUX<br>race-bike:NN<br>tour-bike:NN<br>race-a:DET<br>ride-bike:DOBJ<br>man-an:DET<br>race-mountain:NN<br>motorcycle-a:DET                             |
| 251                    |  | home,interior,design<br>room,design,home<br>interior,furniture,house<br>kitchen,interior,design<br>office,apple,mac | shelf-book:NN<br>desk-bedroom:PREP_IN<br>office-home:NN<br>desk-the:DET<br>room-living:NN<br>root-desk:ROOT<br>desk-room:PREP_IN<br>kitchen-the:DET<br>room-computer:NN<br>living-room:DOBJ<br>shelves-the:DET<br>door-looking:VMOD<br>looking-room:PREP_INTO<br>room-new:AMOD<br>fireplace-the:DET |
| Continued on next page |                                                                                     |                                                                                                                     |                                                                                                                                                                                                                                                                                                     |



Table1 – continued from previous page

| Index | Image                                                                               | NUS-WIDE Concepts                                                                                                              | SBU Concepts                                                                                                                                                                                                                                                                                                                        |
|-------|-------------------------------------------------------------------------------------|--------------------------------------------------------------------------------------------------------------------------------|-------------------------------------------------------------------------------------------------------------------------------------------------------------------------------------------------------------------------------------------------------------------------------------------------------------------------------------|
| 252   |    | car,automobile,truck<br>silver,car,street<br>automobile,ontario,speed<br>driver,cars,auto<br>automobile,transportation,vintage | parked-car:NSUBJ<br>car-street:PREP_IN<br>parked-street:PREP_IN<br>car-green:AMOD<br>car-classic:AMOD<br>car-blue:AMOD<br>car-new:AMOD<br>car-rental:AMOD<br>parked-street:PREP_ON<br>cars-two:NUM<br>root-car:ROOT<br>spotted-car:NSUBJ<br>car-little:AMOD<br>car-sitting:VMOD<br>car-road:PREP_ON                                 |
| 253   |   | room,design,home<br>cottage,vintage,pink<br>guest,room,cat<br>cat,kitten,kitty<br>tortoise,cat,dog                             | table-room:NN<br>table-side:NN<br>table-house:PREP_IN<br>room-front:AMOD<br>table-room:PREP_IN<br>cat-kitchen:PREP_IN<br>floor-room:PREP_IN<br>chair-room:PREP_IN<br>bedroom-house:PREP_OF<br>chair-orange:AMOD<br>floor-kitchen:PREP_IN<br>room-great:AMOD<br>middle-floor:PREP_OF<br>sitting-room:PREP_IN<br>root-downstairs:ROOT |
| 254   |  | bike,motorcycle,race<br>motorcycle,road,sky<br>race,bike,politics<br>road,city,people<br>desert,portrait,california            | race-bike:NN<br>race-mountain:NN<br>bike-mountain:NN<br>race-the:DET<br>race-cup:NN<br>root-race:ROOT<br>motorcycle-a:DET<br>race-a:DET<br>root-ride:ROOT<br>ride-bike:NSUBJ<br>tour-bike:NN<br>man-an:DET<br>bike-road:NN<br>bike-front:PREP_IN<br>show-tv:NN                                                                      |

Continued on next page

Table1 – continued from previous page

| Index                  | Image                                                                               | NUS-WIDE Concepts                                                                                                             | SBU Concepts                                                                                                                                                                                                                                                                                                                              |
|------------------------|-------------------------------------------------------------------------------------|-------------------------------------------------------------------------------------------------------------------------------|-------------------------------------------------------------------------------------------------------------------------------------------------------------------------------------------------------------------------------------------------------------------------------------------------------------------------------------------|
| 255                    |    | sheep,dog,white<br>dog,beach,water<br>river,raft,summer<br>wave,surf,action<br>houseboat,india,nature                         | horse-white:AMOD<br>washing-river:PREP_IN<br>swimming-river:PREP_IN<br>bath-river:PREP_IN<br>standing-river:PREP_IN<br>river-a:DET<br>trying-catch:XCOMP<br>root-swans:ROOT<br>fish-river:PREP_IN<br>river-running:VMOD<br>washing-clothes:DOBJ<br>middle-river:PREP_OF<br>riding-horse:DOBJ<br>river-house:PREP_NEAR<br>man-dog:CONJ_AND |
| 256                    |   | self,red,bathroom<br>hospital,people,california<br>cats,kitten,pets<br>room,people,adults<br>state,party,president            | bed-bedroom:PREP_IN<br>bed-room:PREP_IN<br>bed-size:NN<br>bed-queen:NN<br>bed-boy:NN<br>root-guest:ROOT<br>floor-room:PREP_IN<br>night-bed:PREP_IN<br>bed-house:PREP_IN<br>bedroom-spare:AMOD<br>box-big:AMOD<br>sit-chair:PREP_IN<br>table-train:NN<br>bedroom-main:AMOD<br>root-downstairs:ROOT                                         |
| 257                    |  | sports,male,men<br>girls,asian,basketball<br>cheerleader,university,college<br>university,sports,sport<br>football,fan,berlin | girl-sexy:AMOD<br>trail-river:NN<br>seat-bike:NN<br>tri-swim:PREP_WITH<br>trail-nlr:NN<br>bike-trail:PREP_ON<br>lake-ski:AMOD<br>tri-sprint:NN<br>swim-run:CONJ_AND<br>swim-lake:PREP_IN<br>race-a:DET<br>swim-the:DET<br>swim-bike:CONJ_AND<br>girl-boy:CONJ_AND<br>root-show:ROOT                                                       |
| Continued on next page |                                                                                     |                                                                                                                               |                                                                                                                                                                                                                                                                                                                                           |

Table1 – continued from previous page

| Index | Image                                                                               | NUS-WIDE Concepts                                                                                                               | SBU Concepts                                                                                                                                                                                                                                                                                        |
|-------|-------------------------------------------------------------------------------------|---------------------------------------------------------------------------------------------------------------------------------|-----------------------------------------------------------------------------------------------------------------------------------------------------------------------------------------------------------------------------------------------------------------------------------------------------|
| 258   |    | adult,bird,birds<br>bird,flight,water<br>bird,tree,hawk<br>female,animal,pet<br>lakes,birds,animals                             | swan-black:AMOD<br>duck-white:AMOD<br>root-blackbird:ROOT<br>pigeon-a:DET<br>duck-the:DET<br>pond-a:DET<br>duck-black:AMOD<br>bird-male:AMOD<br>bird-water:NN<br>duck-water:PREP_IN<br>bird-black:AMOD<br>duck-male:AMOD<br>duck-wood:NN<br>root-goose:ROOT<br>duck-little:AMOD                     |
| 259   |   | shops,fun,florida<br>chairs,interior,office<br>building>window,abandoned<br>mall,shop,ontario<br>lighting,architecture,interior | lounge-the:DET<br>lamps-the:DET<br>root-bar:ROOT<br>person-the:DET<br>box-glass:NN<br>tables-chairs:CONJ_AND<br>station-main:AMOD<br>bar-a:DET<br>display-window:NSUBJ<br>machine-flying:AMOD<br>bar-an:DET<br>shopping-window:NN<br>shop-gift:NN<br>window-office:PREP_OF<br>painting-wall:PREP_ON |
| 260   |  | racing,classic,cars<br>race,car,auto<br>kuwait,car,cars<br>car,automobile,truck<br>speed,racing,car                             | car-one:NUM<br>one-cars:PREP_OF<br>parked-street:PREP_ON<br>car-blue:AMOD<br>root-show:ROOT<br>truck-blue:AMOD<br>truck-big:AMOD<br>cars-two:NUM<br>spotted-car:NSUBJ<br>show-car:NSUBJ<br>car-classic:AMOD<br>car-police:NN<br>show-car:NN<br>root-car:ROOT<br>trucks-the:DET                      |

Continued on next page

**Table1 – continued from previous page**

| Index                  | Image                                                                               | NUS-WIDE Concepts                                                                                            | SBU Concepts                                                                                                                                                                                                                                                                                            |
|------------------------|-------------------------------------------------------------------------------------|--------------------------------------------------------------------------------------------------------------|---------------------------------------------------------------------------------------------------------------------------------------------------------------------------------------------------------------------------------------------------------------------------------------------------------|
| 261                    |    | grass,cow,field<br>animals,africa,deer<br>sheep,animal,horns<br>run,grass,pet<br>wild,deer,africa            | root-sheep:ROOT<br>sheep-field:PREP_IN<br>cow-the:DET<br>sheep-the:DET<br>grazing-field:PREP_IN<br>root-cow:ROOT<br>horse-field:PREP_IN<br>horses-field:PREP_IN<br>cow-field:PREP_IN<br>dog-field:PREP_IN<br>root-horses:ROOT<br>cows-field:PREP_IN<br>cow-a:DET<br>buffalo-water:NN<br>grass-lush:AMOD |
| 262                    |   | hill,italy,italia<br>golf,spain,flag<br>sheep,landscape,sky<br>countryside,clouds,green<br>field,clouds,blue | field-cow:NN<br>field-green:AMOD<br>middle-field:PREP_OF<br>hill-a:DET<br>hill-tree:NN<br>standing-field:PREP_IN<br>field-open:AMOD<br>field-grass:NN<br>field-big:AMOD<br>house-field:PREP_IN<br>field-an:DET<br>field-soccer:NN<br>hill-green:AMOD<br>field-corn:NN<br>pasture-cow:NN                 |
| 263                    |  | toy,figures,green<br>kids,art,baby<br>glasses,book,white<br>space,white,art<br>coffee,red,mug                | root-bowls:ROOT<br>pots-the:DET<br>container-the:DET<br>bowl-dog:NN<br>bowl-the:DET<br>surrounded-flowers:AGENT<br>mug-the:DET<br>pot-big:AMOD<br>bucket-the:DET<br>root-pots:ROOT<br>pot-clay:NN<br>bottle-old:AMOD<br>in-box:POBJ<br>sale-market:PREP_IN<br>root-oil:ROOT                             |
| Continued on next page |                                                                                     |                                                                                                              |                                                                                                                                                                                                                                                                                                         |



Table1 – continued from previous page

| Index | Image                                                                               | NUS-WIDE Concepts                                                                                                                           | SBU Concepts                                                                                                                                                                                                                                                                                             |
|-------|-------------------------------------------------------------------------------------|---------------------------------------------------------------------------------------------------------------------------------------------|----------------------------------------------------------------------------------------------------------------------------------------------------------------------------------------------------------------------------------------------------------------------------------------------------------|
| 264   |    | sailboat,ship,blue<br>sail,race,sailboat<br>boat,sail,sailing<br>sailing,california,sky<br>sails,sailboat,sail                              | boat-sail:AMOD<br>sail-the:DET<br>sail-boat:DOBJ<br>root-sail:ROOT<br>root-ship:ROOT<br>bridge-golden:AMOD<br>boat-water:PREP_IN<br>lake-clear:NN<br>root-safe:ROOT<br>root-sailboat:ROOT<br>sailboat-a:DET<br>bridge-fog:PREP_IN<br>boats-sail:AMOD<br>harbor-the:DET<br>races-sail:AMOD                |
| 265   |   | design,interior,furniture<br>interior,furniture,house<br>furniture,architecture,interior<br>kitchen,interior,design<br>cottage,vintage,pink | root-room:ROOT<br>looking-room:PREP_INTO<br>living-room:DOBJ<br>room-main:AMOD<br>bedroom-house:PREP_OF<br>leads-door:NSUBJ<br>room-the:DET<br>table-window:PREP_BY<br>room-house:PREP_IN<br>room-great:AMOD<br>area-bar:NN<br>space-the:DET<br>lab-the:DET<br>kitchen-house:NN<br>kitchen-house:PREP_IN |
| 266   |  | train,tracks,light<br>locomotive,bridge,track<br>tracks,locomotive,station<br>rail,engine,steam<br>railroad,clouds,bridge                   | train-the:DET<br>root-train:ROOT<br>train-a:DET<br>train-car:NN<br>train-an:DET<br>tracks-railroad:NN<br>car-street:NN<br>platform-the:DET<br>railway-the:DET<br>train-line:NN<br>yard-train:NN<br>tracks-train:NSUBJ<br>goes-train:NSUBJ<br>root-waits:ROOT<br>passes-train:NSUBJ                       |

Continued on next page

Table1 – continued from previous page

| Index                  | Image                                                                               | NUS-WIDE Concepts                                                                                              | SBU Concepts                                                                                                                                                                                                                                                                       |
|------------------------|-------------------------------------------------------------------------------------|----------------------------------------------------------------------------------------------------------------|------------------------------------------------------------------------------------------------------------------------------------------------------------------------------------------------------------------------------------------------------------------------------------|
| 267                    |    | horse,red,white<br>running,sport,athlete<br>sports,football,game<br>playing,beach,water<br>racing,horse,sport  | swim-the:DET<br>bike-trail:PREP_ON<br>swim-bike:CONJ_AND<br>tri-sprint:NN<br>tri-swim:PREP_WITH<br>trail-nlr:NN<br>team-the:DET<br>swim-lake:PREP_IN<br>swim-run:CONJ_AND<br>lake-ski:AMOD<br>trail-river:NN<br>horses-the:DET<br>root-friends:ROOT<br>game-a:DET<br>horse-a:DET   |
| 268                    |   | dogs,funny,cute<br>hospital,people,california<br>pet,dog,puppy<br>army,guns,weapons<br>picture,portrait,people | root-night:ROOT<br>banks-outer:NN<br>chair-blue:AMOD<br>bag-sleeping:AMOD<br>bed-boy:NN<br>girl-chair:PREP_IN<br>chair-girl:NN<br>bed-girl:NN<br>root-charlie:ROOT<br>play-to:AUX<br>boy-big:AMOD<br>seat-house:PREP_IN<br>boy-bed:PREP_IN<br>root-kids:ROOT<br>night-bed:PREP_IN  |
| 269                    |  | race,car,auto<br>speed,racing,car<br>driver,cars,auto<br>vehicle,cars,speed<br>police,car,cars                 | car-green:AMOD<br>car-blue:AMOD<br>car-little:AMOD<br>spotted-car:NSUBJ<br>car-police:NN<br>car-the:DET<br>parked-car:NSUBJ<br>plate-license:NN<br>car-white:AMOD<br>cars-many:AMOD<br>parked-car:NSUBJPASS<br>truck-the:DET<br>car-rental:AMOD<br>car-yellow:AMOD<br>cars-two:NUM |
| Continued on next page |                                                                                     |                                                                                                                |                                                                                                                                                                                                                                                                                    |

**Table1 – continued from previous page**

| Index | Image                                                                               | NUS-WIDE Concepts                                                                                                        | SBU Concepts                                                                                                                                                                                                                                                                                                 |
|-------|-------------------------------------------------------------------------------------|--------------------------------------------------------------------------------------------------------------------------|--------------------------------------------------------------------------------------------------------------------------------------------------------------------------------------------------------------------------------------------------------------------------------------------------------------|
| 270   | 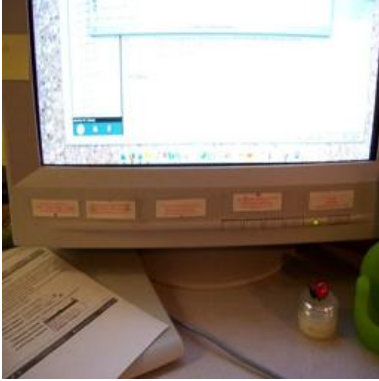   | mac,black,music<br>design,interior,furniture<br>apple,mac,black<br>retro,modern,furniture<br>bathroom,abandoned,interior | cabinet-medicine:NN<br>root-cabinet:ROOT<br>tile-the:DET<br>root-counter:ROOT<br>oven-microwave:NN<br>cabinet-the:DET<br>root-corner:ROOT<br>sink-kitchen:PREP_IN<br>root-kitchen:ROOT<br>platform-the:DET<br>board-the:DET<br>television-a:DET<br>cabinet-a:DET<br>table-side:NN<br>cabinet-kitchen:PREP_IN |
| 271   |   | houseboat,india,nature<br>boat,river,boats<br>vancouver,night,reflection<br>ship,sunset,clouds<br>ships,port,boat        | house-boat:NN<br>boats-house:NN<br>boats-small:AMOD<br>lake-park:PREP_IN<br>house-lake:PREP_BY<br>middle-river:PREP_OF<br>house-lake:PREP_ON<br>looking-river:DOBJ<br>house-lake:PREP_IN<br>boat-cruise:NN<br>one-boats:PREP_OF<br>on-river:POBJ<br>eye-london:NN<br>boats-the:DET<br>root-harbor:ROOT       |
| 272   |  | book,dog,funny<br>weapons,art,sign<br>chair,room,office<br>lamp,wall>window<br>home,interior,design                      | table-side:NN<br>table-room:PREP_IN<br>bottle-empty:AMOD<br>root-bottles:ROOT<br>container-the:DET<br>room-sitting:AMOD<br>stay-to:AUX<br>shelf-book:NN<br>bottle-an:DET<br>desk-bedroom:PREP_IN<br>screen-the:DET<br>bottle-wine:NN<br>desk-room:PREP_IN<br>book-new:AMOD<br>bar-little:AMOD                |

Continued on next page

Table1 – continued from previous page

| Index                  | Image                                                                               | NUS-WIDE Concepts                                                                                             | SBU Concepts                                                                                                                                                                                                                                                                                           |
|------------------------|-------------------------------------------------------------------------------------|---------------------------------------------------------------------------------------------------------------|--------------------------------------------------------------------------------------------------------------------------------------------------------------------------------------------------------------------------------------------------------------------------------------------------------|
| 273                    |    | airplane,pilot,fighter<br>football,fan,berlin<br>wings,bird,sky<br>holland,dance,light<br>action,sports,game  | girl-yellow:PREP_IN<br>root-race:ROOT<br>black-yellow:CONJ_AND<br>shirt-yellow:AMOD<br>ball-the:DET<br>playing-guitar:DOBJ<br>father-son:CONJ_AND<br>root-play:ROOT<br>seat-bike:NN<br>root-woman:ROOT<br>baskets-ewe:NN<br>team-the:DET<br>yellow-blue:CONJ_AND<br>parade-the:DET<br>having-ball:DOBJ |
| 274                    |   | formula,historic,classic<br>car,racing,race<br>race,car,auto<br>race,car,formula<br>racing,cars,classic       | car-red:AMOD<br>truck-red:AMOD<br>root-cars:ROOT<br>car-yellow:AMOD<br>cars-two:NUM<br>spotted-car:NSUBJ<br>show-car:NN<br>show-a:DET<br>see-car:DOBJ<br>has-car:NSUBJ<br>car-rental:AMOD<br>car-toy:NN<br>car-green:AMOD<br>lot-parking:NN<br>car-police:NN                                           |
| 275                    |  | horses,portrait,animal<br>brown,animal,bear<br>manhattan,people,man<br>best,photo,love<br>peace,love,portrait | root-horses:ROOT<br>root-horse:ROOT<br>horse-the:DET<br>root-cow:ROOT<br>cow-a:DET<br>horses-wild:AMOD<br>horse-a:DET<br>pony-a:DET<br>cow-field:PREP_IN<br>horse-field:PREP_IN<br>horses-two:NUM<br>horse-black:AMOD<br>pasture-a:DET<br>horses-the:DET<br>root-ginger:ROOT                           |
| Continued on next page |                                                                                     |                                                                                                               |                                                                                                                                                                                                                                                                                                        |



Table1 – continued from previous page

| Index                  | Image                                                                               | NUS-WIDE Concepts                                                                                                           | SBU Concepts                                                                                                                                                                                                                                                                                          |
|------------------------|-------------------------------------------------------------------------------------|-----------------------------------------------------------------------------------------------------------------------------|-------------------------------------------------------------------------------------------------------------------------------------------------------------------------------------------------------------------------------------------------------------------------------------------------------|
| 276                    |    | hangar,aviation,aircraft<br>museum,history,war<br>death,people,iraq<br>furniture,chairs,retro<br>chair,furniture,blue       | table-chairs:CONJ_AND<br>table-house:PREP_IN<br>bench-a:DET<br>table-pool:NN<br>root-vintage:ROOT<br>table-bar:PREP_IN<br>chairs-two:NUM<br>table-side:NN<br>root-frame:ROOT<br>root-custom:ROOT<br>ship-bottle:PREP_IN<br>one-cars:PREP_OF<br>area-office:NN<br>chair-house:PREP_IN<br>seats-the:DET |
| 277                    |   | boat,lake,blue<br>runway,flight,aviation<br>helicopters,canada,toronto<br>united,airplane,airport<br>air,airport,aircraft   | root-boats:ROOT<br>bow-the:DET<br>one-boats:PREP_OF<br>machine-flying:AMOD<br>putting-water:PREP_IN<br>sail-to:AUX<br>may-collection:NN<br>catch-fish:DOBJ<br>boats-small:AMOD<br>flying-order:DOBJ<br>boats-many:AMOD<br>fisherman-a:DET<br>boat-white:AMOD<br>boats-the:DET<br>boat-bay:PREP_IN     |
| 278                    |  | bike,motorcycle,race<br>motorcycle,motion,asia<br>motorcycle,road,sky<br>square,portrait,china<br>police,protesters,protest | ride-bike:DOBJ<br>bike-front:PREP_IN<br>red-black:CONJ_AND<br>girl-boy:CONJ_AND<br>motorcycle-a:DET<br>bicycle-a:DET<br>man-an:DET<br>race-a:DET<br>suit-a:DET<br>shoes-white:AMOD<br>cross-street:DOBJ<br>woman-walking:VMOD<br>man-walking:VMOD<br>girl-pretty:AMOD<br>pants-red:AMOD               |
| Continued on next page |                                                                                     |                                                                                                                             |                                                                                                                                                                                                                                                                                                       |

Table1 – continued from previous page

| Index                  | Image                                                                               | NUS-WIDE Concepts                                                                                                                                           | SBU Concepts                                                                                                                                                                                                                                                                                                                                 |
|------------------------|-------------------------------------------------------------------------------------|-------------------------------------------------------------------------------------------------------------------------------------------------------------|----------------------------------------------------------------------------------------------------------------------------------------------------------------------------------------------------------------------------------------------------------------------------------------------------------------------------------------------|
| 279                    |    | <p>protest,france,protesters<br/> friend,girl,happy<br/> religion,people,portrait<br/> bush,photojournalism,protest<br/> scotland,architecture,festival</p> | <p>in-shirt:POBJ<br/> me-front:PREP_IN<br/> houses-green:AMOD<br/> girl-jacket:PREP_IN<br/> in-front:POBJ<br/> root-rob:ROOT<br/> root-mark:ROOT<br/> root-ben:ROOT<br/> root-standing:ROOT<br/> boy-white:AMOD<br/> hat-black:AMOD<br/> dress-green:AMOD<br/> root-family:ROOT<br/> hats-the:DET<br/> me-house:PREP_IN</p>                  |
| 280                    |   | <p>locomotive,bridge,track<br/> engine,rail,locomotive<br/> railroad,locomotive,steam<br/> train,engine,steam<br/> track,locomotive,engine</p>              | <p>root-train:ROOT<br/> train-a:DET<br/> railway-the:DET<br/> train-an:DET<br/> train-freight:NN<br/> line-train:NN<br/> train-old:AMOD<br/> train-steam:NN<br/> car-abandoned:AMOD<br/> train-the:DET<br/> yard-train:NN<br/> train-car:NN<br/> bus-school:NN<br/> station-railway:NN<br/> car-one:NUM</p>                                  |
| 281                    |  | <p>airport,airplanes,wing<br/> jet,airplanes,wing<br/> wings,airplane,airplanes<br/> airplane,wings,wing<br/> transportation,fly,engine</p>                 | <p>plane-the:DET<br/> museum-airplane:NN<br/> may-heritage:NN<br/> flying-order:DOBJ<br/> may-collection:NN<br/> museum-vintage:AMOD<br/> machine-flying:AMOD<br/> airport-the:DET<br/> putting-water:PREP_IN<br/> park-car:DOBJ<br/> ships-the:DET<br/> rain-the:DET<br/> bridge-pedestrian:AMOD<br/> root-lot:ROOT<br/> root-sail:ROOT</p> |
| Continued on next page |                                                                                     |                                                                                                                                                             |                                                                                                                                                                                                                                                                                                                                              |

Table1 – continued from previous page

| Index                  | Image                                                                               | NUS-WIDE Concepts                                                                                                             | SBU Concepts                                                                                                                                                                                                                                                                                                        |
|------------------------|-------------------------------------------------------------------------------------|-------------------------------------------------------------------------------------------------------------------------------|---------------------------------------------------------------------------------------------------------------------------------------------------------------------------------------------------------------------------------------------------------------------------------------------------------------------|
| 282                    |    | horse,red,white<br>horses,portrait,animal<br>horse,foals,animals<br>race,bike,politics<br>horse,argentina,field               | horse-the:DET<br>horse-a:DET<br>riding-horse:DOBJ<br>horses-the:DET<br>root-horse:ROOT<br>ride-a:DET<br>game-a:DET<br>pony-a:DET<br>best-seat:DEP<br>man-sitting:DEP<br>standing-around:PRT<br>mai-chiang:NN<br>horse-black:AMOD<br>security-the:DET<br>man-old:AMOD                                                |
| 283                    |   | truck,sky,clouds<br>roadblock,truck,belgium<br>road,city,people<br>motorcycle,road,sky<br>tollbooth,illinois,chicago          | root-roads:ROOT<br>road-the:DET<br>roads-mountain:NN<br>mountain-background:PREP_IN<br>pass-the:DET<br>road-mountains:PREP_IN<br>roads-the:DET<br>walking-road:DOBJ<br>on-road:POBJ<br>hill-steep:AMOD<br>tour-bike:NN<br>ride-bike:NSUBJ<br>mountains-background:PREP_IN<br>root-highway:ROOT<br>walking-hill:DOBJ |
| 284                    |  | food,cheese,restaurant<br>wedding,cake,flowers<br>restaurant,food,japanese<br>vegetables,japanese,japan<br>japanese,food,rice | sauce-a:DET<br>root-lunch:ROOT<br>root-dinner:ROOT<br>beans-green:AMOD<br>leaf-banana:NN<br>rice-brown:AMOD<br>root-rice:ROOT<br>chicken-sauce:PREP_IN<br>sauce-wine:NN<br>juice-orange:AMOD<br>sauce-white:AMOD<br>root-chocolate:ROOT<br>bowl-big:AMOD<br>root-breakfast:ROOT<br>onions-green:AMOD                |
| Continued on next page |                                                                                     |                                                                                                                               |                                                                                                                                                                                                                                                                                                                     |

Table1 – continued from previous page

| Index | Image                                                                               | NUS-WIDE Concepts                                                                                                                 | SBU Concepts                                                                                                                                                                                                                                                                                                   |
|-------|-------------------------------------------------------------------------------------|-----------------------------------------------------------------------------------------------------------------------------------|----------------------------------------------------------------------------------------------------------------------------------------------------------------------------------------------------------------------------------------------------------------------------------------------------------------|
| 285   |    | chairs,interior,office<br>chair,room,office<br>wall,graffiti,art<br>paris,panorama,polar<br>life,city,street                      | root-chairs:ROOT<br>model-the:DET<br>chair-black:AMOD<br>table-window:PREP_BY<br>tables-chairs:CONJ_AND<br>chairs-the:DET<br>root-balcony:ROOT<br>room-house:PREP_IN<br>floor-fourth:AMOD<br>root-lounge:ROOT<br>side-either:DET<br>tables-the:DET<br>room-green:AMOD<br>root-room:ROOT<br>read-book:DOBJ      |
| 286   |   | interior,furniture,house<br>modern,interior,furniture<br>chair,room,office<br>chairs,interior,office<br>design,interior,furniture | living-room:DOBJ<br>root-room:ROOT<br>room-living:AMOD<br>room-kitchen:CONJ_AND<br>dining-room:DOBJ<br>room-living:NN<br>lounge-the:DET<br>root-lounge:ROOT<br>fireplace-the:DET<br>room-looking:VMOD<br>tv-screen:NN<br>room-floor:NN<br>bedroom-house:PREP_OF<br>has-bedroom:NSUBJ<br>room-house:PREP_IN     |
| 287   |  | air,fly,aircraft<br>airforce,sky,airplane<br>fighter,jet,plane<br>helicopter,sunset,sky<br>pilot,landing,airplane                 | flying-house:PREP_OVER<br>plane-flying:VMOD<br>plane-sky:PREP_IN<br>flying-house:DOBJ<br>plane-flying:DEP<br>root-flies:ROOT<br>root-airplane:ROOT<br>bird-sky:PREP_IN<br>plane-small:AMOD<br>root-plane:ROOT<br>kite-a:DET<br>airplane-an:DET<br>root-kite:ROOT<br>airplane-flying:DEP<br>bird-flight:PREP_IN |

Continued on next page



**Table1 – continued from previous page**

| Index                  | Image                                                                               | NUS-WIDE Concepts                                                                                                           | SBU Concepts                                                                                                                                                                                                                                                                                                |
|------------------------|-------------------------------------------------------------------------------------|-----------------------------------------------------------------------------------------------------------------------------|-------------------------------------------------------------------------------------------------------------------------------------------------------------------------------------------------------------------------------------------------------------------------------------------------------------|
| 288                    |    | park,animal,wildlife<br>mother,animal,cat<br>antlers,wild,elk<br>caribou,animals,alaska<br>wild,deer,africa                 | eating-grass:DOBJ<br>root-lion:ROOT<br>root-elk:ROOT<br>run-birds:NN<br>animals-run:CONJ_AND<br>animals-park:NN<br>lion-tree:PREP_IN<br>road-park:PREP_IN<br>goat-a:DET<br>root-horse:ROOT<br>animals-bayou:AMOD<br>animals-habitat:PREP_IN<br>horse-field:PREP_IN<br>animals-freely:CONJ_OR<br>horse-a:DET |
| 289                    |   | cats,kitten,pets<br>cat,kitten,kitty<br>kitty,white,cats<br>pair,animal,cat<br>adorable,rabbit,bunny                        | cat-cute:AMOD<br>cats-the:DET<br>cat-white:AMOD<br>cat-house:NN<br>root-cats:ROOT<br>in-room:POBJ<br>cat-fat:AMOD<br>hangs-out:PRT<br>loves-sitting:XCOMP<br>dogs-the:DET<br>loves-sit:XCOMP<br>kitty-window:PREP_IN<br>fireplace-the:DET<br>cat-lives:RCMOD<br>dogs-cats:CONJ_AND                          |
| 290                    |  | interior,furniture,house<br>chairs,interior,office<br>modern,interior,furniture<br>nsw,coast,signs<br>room>window,abandoned | room-house:PREP_IN<br>living-room:DOBJ<br>root-lounge:ROOT<br>area-bar:NN<br>room-sitting:AMOD<br>room-family:NN<br>sliding-doors:DOBJ<br>bedroom-house:PREP_OF<br>root-room:ROOT<br>bed-house:PREP_IN<br>root-guest:ROOT<br>dining-room:DOBJ<br>room-living:AMOD<br>area-office:NN<br>tables-the:DET       |
| Continued on next page |                                                                                     |                                                                                                                             |                                                                                                                                                                                                                                                                                                             |

Table1 – continued from previous page

| Index | Image                                                                               | NUS-WIDE Concepts                                                                                                     | SBU Concepts                                                                                                                                                                                                                                                                                                                   |
|-------|-------------------------------------------------------------------------------------|-----------------------------------------------------------------------------------------------------------------------|--------------------------------------------------------------------------------------------------------------------------------------------------------------------------------------------------------------------------------------------------------------------------------------------------------------------------------|
| 291   |    | nose,dog,cow<br>pets,cat,cats<br>beards,male,man<br>play,dog,dogs<br>run,grass,pet                                    | watching-birds:DOBJ<br>time-every:DET<br>looking-window:DOBJ<br>sill-window:NN<br>monkey-a:DET<br>window-the:DET<br>position-a:DET<br>take-picture:DOBJ<br>cats-black:AMOD<br>cub-bear:NN<br>cute-very:ADV<br>florida-orlando:NN<br>nap-a:DET<br>monkeys-the:DET<br>sitting-window:PREP_BY                                     |
| 292   |   | president,photo,art<br>trip,summer,people<br>gun,rifles,soldiers<br>locomotive,bridge,track<br>uniform,world,historic | bed-truck:PREP_OF<br>truck-the:DET<br>yard-train:NN<br>accident-car:NN<br>sidewalk-<br>house:PREP_IN_FRONT_OF<br>root-works:ROOT<br>cars-trucks:CONJ_AND<br>system-a:DET<br>accident-a:DET<br>fire-a:DET<br>root-truck:ROOT<br>deck-the:DET<br>show-flower:NN<br>photos-taken:VMOD<br>plant-flowers:DOBJ                       |
| 293   |  | guns,history,vintage<br>eyes,white,nose<br>museum,history,war<br>wow,light,people<br>weapons,soldiers,soldier         | car-white:AMOD<br>house-car:CONJ_AND<br>middle-street:PREP_OF<br>scheme-white:AMOD<br>parked-street:PREP_ON<br>root-coach:ROOT<br>root-van:ROOT<br>car-street:PREP_IN<br>put-water:PREP_IN<br>car-house:PREP_OF<br>courthouse-county:NN<br>car-front:PREP_IN<br>tuna-market:PREP_AT<br>car-parked:VMOD<br>people-standing:VMOD |

Continued on next page

**Table1 – continued from previous page**

| Index | Image                                                                               | NUS-WIDE Concepts                                                                                                            | SBU Concepts                                                                                                                                                                                                                                                                                              |
|-------|-------------------------------------------------------------------------------------|------------------------------------------------------------------------------------------------------------------------------|-----------------------------------------------------------------------------------------------------------------------------------------------------------------------------------------------------------------------------------------------------------------------------------------------------------|
| 294   |    | chair,room,office<br>chairs,interior,office<br>telephones,office,room<br>melbourne,street,alley<br>modern,interior,furniture | desk-a:DET<br>kitchen-house:PREP_IN<br>table-chairs:CONJ_AND<br>tables-chairs:CONJ_AND<br>shopping-window:NN<br>root-chairs:ROOT<br>move-to:AUX<br>chairs-the:DET<br>chair-desk:NN<br>office-home:NN<br>machine-sewing:AMOD<br>lab-computer:NN<br>stove-kitchen:PREP_IN<br>room-the:DET<br>root-desk:ROOT |
| 295   |   | apple,office,mac<br>office,apple,mac<br>mac,office,photography<br>studio,microphones,office<br>coffee,man,apple              | root-desk:ROOT<br>desk-office:PREP_IN<br>desk-the:DET<br>computer-the:DET<br>desk-computer:NN<br>desk-bedroom:PREP_IN<br>desk-room:PREP_IN<br>office-home:NN<br>laptop-the:DET<br>desk-office:NN<br>desk-new:AMOD<br>desk-a:DET<br>office-the:DET<br>monitor-the:DET<br>keyboard-the:DET                  |
| 296   |  | auto,truck,canada<br>police,car,cars<br>bus,people,england<br>parade,school,old<br>subway,people,graffiti                    | truck-front:PREP_IN<br>house-car:CONJ_AND<br>street-city:PREP_IN<br>car-street:PREP_IN<br>parked-car:NSUBJ<br>car-parked:VMOD<br>van-white:AMOD<br>see-car:DOBJ<br>cars-the:DET<br>car-one:NUM<br>bus-city:NN<br>traffic-the:DET<br>truck-white:AMOD<br>car-front:PREP_IN<br>front-car:PREP_OF            |

Continued on next page

Table1 – continued from previous page

| Index | Image                                                                               | NUS-WIDE Concepts                                                                                                                                 | SBU Concepts                                                                                                                                                                                                                                                                                 |
|-------|-------------------------------------------------------------------------------------|---------------------------------------------------------------------------------------------------------------------------------------------------|----------------------------------------------------------------------------------------------------------------------------------------------------------------------------------------------------------------------------------------------------------------------------------------------|
| 297   |    | car,automobile,truck<br>parade,school,old<br>automobile,ontario,speed<br>mall,car,auto<br>engine,truck,auto                                       | car-pink:AMOD<br>car-red:AMOD<br>car-street:PREP_IN<br>one-cars:PREP_OF<br>car-little:AMOD<br>red-black:CONJ_AND<br>car-street:PREP_ON<br>spotted-car:NSUBJ<br>car-cute:AMOD<br>car-vintage:AMOD<br>show-the:DET<br>hood-the:DET<br>year-new:AMOD<br>root-car:ROOT<br>car-background:PREP_IN |
| 298   |   | pottery,handmade,texture<br>vegetables,macro,plants<br>french,bravo,woman<br>leaf,autumn,bravo<br>fruit,blue,nature                               | root-pot:ROOT<br>pot-plant:NN<br>root-pots:ROOT<br>plant-pot:PREP_IN<br>pot-flower:NN<br>table-side:NN<br>pot-the:DET<br>pot-big:AMOD<br>pots-plant:NN<br>glass-shot:NN<br>cup-paper:NN<br>cat-pot:PREP_IN<br>root-cup:ROOT<br>pot-a:DET<br>plant-a:DET                                      |
| 299   |  | demonstration,bush,peace<br>photojournalism,politics,iraq<br>bush,photojournalism,protest<br>march,protest,politics<br>documentary,monks,thailand | film-white:AMOD<br>root-band:ROOT<br>root-men:ROOT<br>black-white:AMOD<br>house-street:NN<br>black-in:ADVMOD<br>band-rock:NN<br>guitar-the:DET<br>photo-black:AMOD<br>black-white:DEP<br>in-black:POBJ<br>people-sitting:VMOD<br>film-black:AMOD<br>crowd-the:DET<br>hill-beacon:NN          |

Continued on next page



Table1 – continued from previous page

| Index                  | Image                                                                               | NUS-WIDE Concepts                                                                                                   | SBU Concepts                                                                                                                                                                                                                                                                                |
|------------------------|-------------------------------------------------------------------------------------|---------------------------------------------------------------------------------------------------------------------|---------------------------------------------------------------------------------------------------------------------------------------------------------------------------------------------------------------------------------------------------------------------------------------------|
| 300                    |    | office,apple,mac<br>home,interior,design<br>mac,office,photography<br>apple,office,mac<br>room,design,home          | root-desk:ROOT<br>office-home:NN<br>desk-room:PREP_IN<br>computer-the:DET<br>desk-bedroom:PREP_IN<br>desk-computer:NN<br>shelf-book:NN<br>room-computer:NN<br>desk-office:PREP_IN<br>style-door:NN<br>desk-the:DET<br>root-computer:ROOT<br>desk-new:AMOD<br>area-bar:NN<br>wall-one:NUM    |
| 301                    |   | austin,motorcycle,police<br>texas,war,field<br>june,world,france<br>parade,school,old<br>truck,tanker,massachusetts | root-truck:ROOT<br>root-guy:ROOT<br>truck-red:AMOD<br>truck-the:DET<br>truck-old:AMOD<br>bed-truck:PREP_OF<br>guy-the:DET<br>people-sitting:VMOD<br>truck-a:DET<br>pants-the:DET<br>truck-pickup:NN<br>truck-blue:AMOD<br>root-team:ROOT<br>root-scene:ROOT<br>cars-the:DET                 |
| 302                    |  | nose,dog,cow<br>dog,white,explore<br>funny,cute,nature<br>puppy,baby,animals<br>dogs,white,cute                     | root-buddy:ROOT<br>root-doggy:ROOT<br>root-puppy:ROOT<br>root-daisy:ROOT<br>puppy-the:DET<br>puppy-cute:AMOD<br>root-dogs:ROOT<br>retriever-golden:AMOD<br>beach-beach:PREP_IN<br>august-2006:NUM<br>puppy-a:DET<br>cute-dog:DOBJ<br>dog-box:PREP_IN<br>dog-car:PREP_IN<br>root-damage:ROOT |
| Continued on next page |                                                                                     |                                                                                                                     |                                                                                                                                                                                                                                                                                             |

**Table1 – continued from previous page**

| Index | Image                                                                               | NUS-WIDE Concepts                                                                                                             | SBU Concepts                                                                                                                                                                                                                                                                                              |
|-------|-------------------------------------------------------------------------------------|-------------------------------------------------------------------------------------------------------------------------------|-----------------------------------------------------------------------------------------------------------------------------------------------------------------------------------------------------------------------------------------------------------------------------------------------------------|
| 303   |    | underground,people,street<br>bus,abandoned,clouds<br>subway,people,graffiti<br>shopping,night,street<br>urban,abandoned,night | street-town:PREP_IN<br>street-city:PREP_IN<br>car-street:NN<br>buses-the:DET<br>train-line:NN<br>street-little:AMOD<br>street-typical:AMOD<br>truck-front:PREP_IN<br>houses-colorful:AMOD<br>street-side:NN<br>coach-a:DET<br>street-narrow:AMOD<br>train-little:AMOD<br>truck-water:NN<br>station-bus:NN |
| 304   |   | sheep,alaska,mountain<br>goat,mountain,wildlife<br>sheep,animal,horns<br>caribou,animals,alaska<br>wild,deer,africa           | horse-white:AMOD<br>goat-mountain:NN<br>root-goat:ROOT<br>root-sheep:ROOT<br>goat-a:DET<br>sheep-a:DET<br>dog-white:AMOD<br>sheep-field:PREP_IN<br>cow-field:PREP_IN<br>egret-great:AMOD<br>field-farm:NN<br>spotted-field:PREP_IN<br>farm-a:DET<br>birds-white:AMOD<br>bird-white:AMOD                   |
| 305   |  | car,automobile,truck<br>vehicle,cars,speed<br>automobile,ontario,speed<br>camera,lens,city<br>auto,automobile,race            | one-cars:PREP_OF<br>parked-street:PREP_ON<br>car-classic:AMOD<br>car-street:PREP_IN<br>parked-car:NSUBJ<br>parked-street:PREP_IN<br>plate-the:DET<br>window-rear:AMOD<br>car-street:PREP_ON<br>cars-two:NUM<br>hood-the:DET<br>plate-license:NN<br>cars-old:AMOD<br>car-green:AMOD<br>show-car:NSUBJ      |

Continued on next page

Table1 – continued from previous page

| Index | Image                                                                               | NUS-WIDE Concepts                                                                                                           | SBU Concepts                                                                                                                                                                                                                                                                                                         |
|-------|-------------------------------------------------------------------------------------|-----------------------------------------------------------------------------------------------------------------------------|----------------------------------------------------------------------------------------------------------------------------------------------------------------------------------------------------------------------------------------------------------------------------------------------------------------------|
| 306   |    | dog, white, explore<br>toy, craft, cute<br>rabbit, sweet, pets<br>playing, animal, bear<br>pair, animal, cat                | family-foster:AMOD<br>taken-family:AGENT<br>dog-service:NN<br>retriever-golden:AMOD<br>elephant-a:DET<br>one-animals:PREP_OF<br>root-dogs:ROOT<br>bear-polar:AMOD<br>cute-dog:DOBJ<br>dog-house:PREP_IN<br>old-months:NPADVMOD<br>animal-towel:NN<br>root-puppy:ROOT<br>root-elephant:ROOT<br>puppy-the:DET          |
| 307   |   | phone, woman, smile<br>riot, protesters, photojournalism<br>dead, human, life<br>gun, guard, police<br>west, america, party | dog-bag:PREP_IN<br>girl-hot:AMOD<br>root-show:ROOT<br>horse-wooden:AMOD<br>girl-sexy:AMOD<br>dressed-black:PREP_IN<br>girl-black:AMOD<br>mask-a:DET<br>band-the:DET<br>arm-the:DET<br>guitar-the:DET<br>position-the:DET<br>root-puppies:ROOT<br>standing-around:PRT<br>mirrors-the:DET                              |
| 308   |  | shopping, bazaar, japan<br>shop, market, food<br>store, food, color<br>food, great, french<br>sewing, room, studio          | stall-market:NN<br>taken-market:PREP_AT<br>market-outdoor:AMOD<br>display-window:PREP_IN<br>market-pike:NN<br>in-market:POBJ<br>store-the:DET<br>fish-market:PREP_IN<br>display-the:DET<br>root-fresh:ROOT<br>sale-market:PREP_AT<br>display-a:DET<br>market-japan:PREP_IN<br>taken-market:PREP_IN<br>market-food:NN |

Continued on next page

**Table1 – continued from previous page**

| Index | Image                                                                               | NUS-WIDE Concepts                                                                                                       | SBU Concepts                                                                                                                                                                                                                                                                                                        |
|-------|-------------------------------------------------------------------------------------|-------------------------------------------------------------------------------------------------------------------------|---------------------------------------------------------------------------------------------------------------------------------------------------------------------------------------------------------------------------------------------------------------------------------------------------------------------|
| 309   | 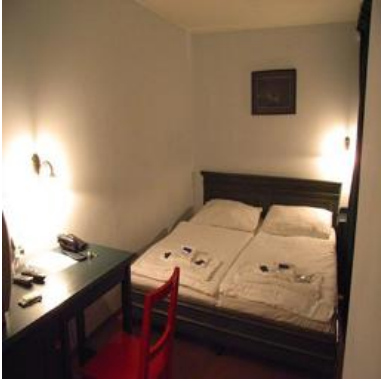   | design,interior,furniture<br>room,design,home<br>home,interior,design<br>carpet,room,chair<br>studio,microphones,office | bedroom-house:PREP_IN<br>root-bedroom:ROOT<br>bed-bedroom:PREP_IN<br>color-wall:NN<br>bedroom-house:PREP_OF<br>living-room:DOBJ<br>root-downstairs:ROOT<br>room-living:AMOD<br>bedroom-a:DET<br>bedroom-master:NN<br>root-room:ROOT<br>bedroom-main:AMOD<br>desk-room:PREP_IN<br>bedroom-the:DET<br>root-guest:ROOT |
| 310   |   | water,ocean,beach<br>fly,bird,sky<br>birds,wings,white<br>booby,kauai,hawaii<br>movement,water,action                   | bird-little:AMOD<br>birds-little:AMOD<br>duck-a:DET<br>looking-food:PREP_FOR<br>root-birds:ROOT<br>bird-water:PREP_IN<br>bird-a:DET<br>root-duck:ROOT<br>birds-the:DET<br>caught-bird:DOBJ<br>root-ducks:ROOT<br>root-bird:ROOT<br>birds-black:AMOD<br>ducks-the:DET<br>male-adult:AMOD                             |
| 311   |  | youth,fun,photography<br>sand,waves,blue<br>wow,airplane,flying<br>sunny,sea,sand<br>photography,wildlife,animal        | beach-black:AMOD<br>beach-sand:NN<br>root-bench:ROOT<br>sand-black:AMOD<br>beach-front:PREP_IN<br>standing-tree:PREP_UNDER<br>road-house:PREP_OF<br>black-beach:DEP<br>beach-hawaii:PREP_IN<br>road-front:PREP_IN<br>path-a:DET<br>birds-white:AMOD<br>beach-park:PREP_IN<br>root-beach:ROOT<br>root-black:ROOT     |

Continued on next page



**Table1 – continued from previous page**

| Index | Image                                                                               | NUS-WIDE Concepts                                                                                                            | SBU Concepts                                                                                                                                                                                                                                                                                                  |
|-------|-------------------------------------------------------------------------------------|------------------------------------------------------------------------------------------------------------------------------|---------------------------------------------------------------------------------------------------------------------------------------------------------------------------------------------------------------------------------------------------------------------------------------------------------------|
| 312   |    | dogs,funny,cute<br>puppy,baby,animals<br>big,animal,wildlife<br>pet,dog,puppy<br>family,people,old                           | bath-river:PREP_IN<br>boy-dog:CONJ_AND<br>dog-brown:AMOD<br>buffalo-water:NN<br>pit-the:DET<br>playing-river:PREP_IN<br>root-dogs:ROOT<br>playing-sand:PREP_IN<br>go-water:PREP_IN<br>root-play:ROOT<br>dogs-the:DET<br>washing-clothes:DOBJ<br>ball-tennis:NN<br>play-water:PREP_IN<br>play-to:AUX           |
| 313   |   | locomotive,bridge,track<br>train,sky,city<br>railway,bridge,steam<br>railroad,locomotive,steam<br>tracks,locomotive,station  | train-an:DET<br>train-freight:NN<br>train-passenger:NN<br>train-a:DET<br>train-the:DET<br>yard-train:NN<br>root-train:ROOT<br>tracks-train:NSUBJ<br>passes-train:NSUBJ<br>cars-train:NN<br>poles-telephone:NN<br>train-car:NN<br>crosses-train:NSUBJ<br>trains-the:DET<br>train-road:NN                       |
| 314   |  | interior,furniture,house<br>home,interior,design<br>design,interior,furniture<br>room,design,home<br>kitchen,interior,design | root-room:ROOT<br>room-the:DET<br>room-living:AMOD<br>living-room:DOBJ<br>room-house:PREP_IN<br>room-family:NN<br>room-new:AMOD<br>looking-room:PREP_INTO<br>dining-room:DOBJ<br>room-great:AMOD<br>room-house:PREP_OF<br>leads-door:NSUBJ<br>table-kitchen:PREP_IN<br>room-guest:NN<br>bedroom-house:PREP_OF |

Continued on next page

Table1 – continued from previous page

| Index                  | Image                                                                               | NUS-WIDE Concepts                                                                                                                 | SBU Concepts                                                                                                                                                                                                                                                                          |
|------------------------|-------------------------------------------------------------------------------------|-----------------------------------------------------------------------------------------------------------------------------------|---------------------------------------------------------------------------------------------------------------------------------------------------------------------------------------------------------------------------------------------------------------------------------------|
| 315                    |    | cats,kitten,pets<br>dogs,funny,cute<br>kitty,orange,cats<br>pets,cat,cats<br>doorway,girl,woman                                   | tree-cat:NN<br>root-buddy:ROOT<br>dog-house:PREP_IN<br>puppy-the:DET<br>chair-computer:NN<br>running-house:PREP_AROUND<br>shelter-animal:NN<br>dogs-the:DET<br>puppy-cute:AMOD<br>house-cat:NN<br>position-a:DET<br>puppy-a:DET<br>cats-the:DET<br>root-dogs:ROOT<br>home-new:AMOD    |
| 316                    |   | football,white,cheerleader<br>sports,football,game<br>sport,athlete,running<br>stadium,game,people<br>cheering,girls,basketball   | play-boys:NSUBJ<br>ball-the:DET<br>game-a:DET<br>playing-ball:DOBJ<br>root-play:ROOT<br>ball-beach:NN<br>plate-home:NN<br>ball-basket:NN<br>ball-a:DET<br>root-game:ROOT<br>shirt-black:AMOD<br>event-the:DET<br>pants-red:AMOD<br>game-the:DET<br>field-ball:NN                      |
| 317                    |  | truck,tanker,massachusetts<br>bus,abandoned,clouds<br>vehicle,abandoned,rust<br>philippines,church,landscape<br>auto,truck,canada | buses-the:DET<br>bus-tour:NN<br>truck-a:DET<br>root-trucks:ROOT<br>trailer-a:DET<br>window-bus:PREP_OF<br>truck-fire:NN<br>train-little:AMOD<br>root-truck:ROOT<br>root-van:ROOT<br>london-east:NN<br>building-style:NN<br>house-front:PREP_IN<br>red-white:CONJ_AND<br>has-car:NSUBJ |
| Continued on next page |                                                                                     |                                                                                                                                   |                                                                                                                                                                                                                                                                                       |

Table1 – continued from previous page

| Index | Image                                                                               | NUS-WIDE Concepts                                                                                                    | SBU Concepts                                                                                                                                                                                                                                                                                             |
|-------|-------------------------------------------------------------------------------------|----------------------------------------------------------------------------------------------------------------------|----------------------------------------------------------------------------------------------------------------------------------------------------------------------------------------------------------------------------------------------------------------------------------------------------------|
| 318   |    | aircraft,flight,aviation<br>jet,sky,flight<br>airplane,flight,sky<br>best,aircraft,plane<br>airforce,flight,airplane | machine-flying:AMOD<br>airplane-a:DET<br>blue-red:CONJ_AND<br>root-plane:ROOT<br>red-white:AMOD<br>view-side:NN<br>background-white:AMOD<br>red-white:CONJ_AND<br>fox-the:DET<br>root-sock:ROOT<br>glass-white:AMOD<br>background-a:DET<br>flying-house:PREP_OVER<br>paper-a:DET<br>display-window:NN    |
| 319   |   | uniform,world,historic<br>cow,rural,sky<br>north,green,england<br>horses,explore,animal<br>parade,school,old         | cow-a:DET<br>root-horse:ROOT<br>security-the:DET<br>horse-black:AMOD<br>riding-horse:DOBJ<br>crossing-road:DOBJ<br>market-animal:NN<br>pony-a:DET<br>horses-the:DET<br>costume-a:DET<br>class-the:DET<br>visit-to:AUX<br>jacket-black:AMOD<br>team-the:DET<br>standing-me:NSUBJ                          |
| 320   |  | wolf,red,fox<br>factory,new,york<br>court,sport,tennis<br>doorway,girl,woman<br>actor,white,males                    | bar-a:DET<br>fireplace-the:DET<br>room-green:AMOD<br>me-house:PREP_IN<br>basement-the:DET<br>standing-in:PRT<br>bar-an:DET<br>standing-front:PREP_IN<br>standing-door:PREP_IN<br>screen-green:AMOD<br>kitchen-house:PREP_OF<br>office-box:NN<br>floor-dance:NN<br>video-the:DET<br>kitchen-house:PREP_AT |

Continued on next page

**Table1 – continued from previous page**

| Index | Image                                                                               | NUS-WIDE Concepts                                                                                                          | SBU Concepts                                                                                                                                                                                                                                                                                                         |
|-------|-------------------------------------------------------------------------------------|----------------------------------------------------------------------------------------------------------------------------|----------------------------------------------------------------------------------------------------------------------------------------------------------------------------------------------------------------------------------------------------------------------------------------------------------------------|
| 321   |    | bicycle,track,art<br>bike,track,vintage<br>museum,history,war<br>frame,art,vintage<br>bicycle,motion,girl                  | bike-front:PREP_IN<br>bicycle-a:DET<br>bike-mountain:NN<br>bike-road:NN<br>dreams-places:PREP_OF<br>leaning-wall:PREP_AGAINST<br>places-unconventionnal:AMOD<br>bike-dreams:DEP<br>bike-field:PREP_IN<br>works-the:DET<br>wheel-a:DET<br>bars-the:DET<br>motorcycle-a:DET<br>root-decoration:ROOT<br>door-white:AMOD |
| 322   |   | roadblock,water,tree<br>shooting,rifles,war<br>refugees,girl,boy<br>boys,people,men<br>roadblock,protest,london            | walking-hill:DOBJ<br>walking-dogs:DOBJ<br>boy-dog:CONJ_AND<br>goat-the:DET<br>plant-to:AUX<br>plant-tree:DOBJ<br>ride-bike:NSUBJ<br>hike-the:DET<br>dogs-the:DET<br>walking-road:DOBJ<br>up-mountain:POBJ<br>hill-big:AMOD<br>man-walking:DEP<br>root-play:ROOT<br>hill-small:AMOD                                   |
| 323   |  | bike,motorcycle,race<br>motorcycle,motion,asia<br>motorcycle,road,sky<br>bicycle,motion,girl<br>officers,motorcycle,people | motorcycle-a:DET<br>root-ride:ROOT<br>bike-front:PREP_IN<br>bike-road:NN<br>ride-bike:DOBJ<br>tour-bike:NN<br>bicycle-a:DET<br>man-old:AMOD<br>ride-bike:NSUBJ<br>ride-bike:NN<br>cap-the:DET<br>dog-basket:PREP_IN<br>trip-bike:NN<br>machine-green:AMOD<br>guy-a:DET                                               |

Continued on next page



**Table1 – continued from previous page**

| Index | Image                                                                               | NUS-WIDE Concepts                                                                                                          | SBU Concepts                                                                                                                                                                                                                                                                                                    |
|-------|-------------------------------------------------------------------------------------|----------------------------------------------------------------------------------------------------------------------------|-----------------------------------------------------------------------------------------------------------------------------------------------------------------------------------------------------------------------------------------------------------------------------------------------------------------|
| 324   |    | buddhist,monks,burma<br>buddhism,monks,people<br>home,portrait,blue<br>burma,photojournalism,faces<br>thailand,monks,burma | shirt-pink:AMOD<br>girl-bar:PREP_IN<br>girls-pink:PREP_IN<br>me-house:PREP_IN<br>glass-wine:PREP_OF<br>me-dress:PREP_IN<br>girls-cute:AMOD<br>girl-cute:AMOD<br>girl-wedding:PREP_IN<br>girl-birthday:NN<br>bar-top:AMOD<br>enjoying-glass:DOBJ<br>girls-flower:NN<br>shirt-an:DET<br>girls-red:PREP_IN         |
| 325   |   | air,fly,aircraft<br>flag,white,stripes<br>airforce,sky,airplane<br>fly,bird,sky<br>fighter,jet,plane                       | flying-house:PREP_OVER<br>bird-flight:PREP_IN<br>kite-a:DET<br>bird-flying:VMOD<br>root-angels:ROOT<br>plane-sky:PREP_IN<br>root-flies:ROOT<br>plane-flying:DEP<br>root-kite:ROOT<br>flying-beach:PREP_OVER<br>plane-a:DET<br>root-flag:ROOT<br>blue-clear:AMOD<br>sky-blue:AMOD<br>flag-a:DET                  |
| 326   |  | pet,dog,rabbit<br>feline,kitten,animals<br>cat,kitten,kitty<br>cats,kitten,pets<br>pets,cat,cats                           | cat-window:PREP_IN<br>root-watches:ROOT<br>watching-birds:DOBJ<br>window-open:AMOD<br>sitting-window:PREP_IN<br>root-lucky:ROOT<br>bottle-water:NN<br>kitty-window:PREP_IN<br>birds-the:DET<br>camera-new:AMOD<br>cute-being:COP<br>cat-white:AMOD<br>cat-lives:RCMOD<br>one-cats:PREP_OF<br>dog-window:PREP_IN |

Continued on next page

Table1 – continued from previous page

| Index | Image                                                                               | NUS-WIDE Concepts                                                                                                         | SBU Concepts                                                                                                                                                                                                                                                                                                      |
|-------|-------------------------------------------------------------------------------------|---------------------------------------------------------------------------------------------------------------------------|-------------------------------------------------------------------------------------------------------------------------------------------------------------------------------------------------------------------------------------------------------------------------------------------------------------------|
| 327   |    | party,politics,water<br>groom,sunset,woman<br>outside,girl,fun<br>australia,melbourne,city<br>brighton,beards,graffiti    | one-shirt:PREP_IN<br>girls-the:DET<br>girls-flower:NN<br>root-girls:ROOT<br>shirt-white:AMOD<br>root-ladies:ROOT<br>root-family:ROOT<br>pants-the:DET<br>floor-dance:NN<br>family-the:DET<br>fence-white:AMOD<br>girl-flower:NN<br>ceremony-the:DET<br>woman-shirt:PREP_IN<br>class-the:DET                       |
| 328   |   | waterways,marsh,landscape<br>bridges,trees,nature<br>houseboat,india,nature<br>canal,nature,trees<br>railway,bridge,steam | house-river:PREP_BY<br>mill-the:DET<br>root-flood:ROOT<br>train-a:DET<br>root-train:ROOT<br>root-land:ROOT<br>launch-the:DET<br>house-boat:NN<br>lot-water:PREP_OF<br>root-houses:ROOT<br>bridge-covered:AMOD<br>river-the:DET<br>mill-paper:NN<br>house-lake:PREP_BY<br>road-rural:AMOD                          |
| 329   |  | home,interior,design<br>studio,microphones,office<br>party,politics,water<br>work,office,apple<br>penguin,toy,white       | sign-table:PREP_IN<br>girls-kitchen:PREP_IN<br>girl-birthday:NN<br>girls-the:DET<br>kitchen-house:PREP_AT<br>reception-the:DET<br>root-party:ROOT<br>classroom-the:DET<br>vase-the:DET<br>table-computer:NN<br>kitchen-house:NN<br>table-window:PREP_BY<br>girls-house:PREP_IN<br>kitchen-the:DET<br>bags-the:DET |

Continued on next page

**Table1 – continued from previous page**

| Index | Image                                                                               | NUS-WIDE Concepts                                                                                                                   | SBU Concepts                                                                                                                                                                                                                                                                                                                                                             |
|-------|-------------------------------------------------------------------------------------|-------------------------------------------------------------------------------------------------------------------------------------|--------------------------------------------------------------------------------------------------------------------------------------------------------------------------------------------------------------------------------------------------------------------------------------------------------------------------------------------------------------------------|
| 330   |    | locomotive,bridge,track<br>track,locomotive,engine<br>railroad,locomotive,steam<br>train,engine,steam<br>rail,engine,steam          | train-a:DET<br>train-car:NN<br>crosses-train:NSUBJ<br>car-abandoned:AMOD<br>root-waits:ROOT<br>car-street:NN<br>train-old:AMOD<br>root-passes:ROOT<br>train-line:NN<br>platform-the:DET<br>train-an:DET<br>waterfront-the:DET<br>yard-train:NN<br>crosses-bridge:DOBJ<br>car-railroad:NN                                                                                 |
| 331   |   | warehouse,old,sky<br>glass,sky,city<br>skyscraper,blue,windows<br>construction,architecture,chicago<br>bank,skyscraper,architecture | office-building:VMOD<br>building-<br>construction:PREP_UNDER<br>looks-building:NSUBJ<br>rapids-grand:NN<br>office-building:DEP<br>buildings-new:AMOD<br>building-station:PREP_NEAR<br>building-cool:AMOD<br>building-district:PREP_IN<br>building-london:PREP_IN<br>tower-office:NN<br>building-one:NUM<br>building-large:AMOD<br>root-bank:ROOT<br>building-modern:AMOD |
| 332   |  | driver,portrait,people<br>kid,brasil,hope<br>refugees,portrait,africa<br>smile,asia,boy<br>rally,election,democrat                  | hospital-the:DET<br>root-holds:ROOT<br>man-shirt:PREP_IN<br>boy-chair:PREP_IN<br>sleeping-seat:PREP_IN<br>girl-a:DET<br>girl-local:AMOD<br>boy-young:AMOD<br>baby-a:DET<br>boy-sitting:DEP<br>seat-car:NN<br>asleep-seat:PREP_IN<br>baby-the:DET<br>girl-market:PREP_IN<br>smile-a:DET                                                                                   |

Continued on next page

Table1 – continued from previous page

| Index | Image                                                                               | NUS-WIDE Concepts                                                                                                              | SBU Concepts                                                                                                                                                                                                                                                                             |
|-------|-------------------------------------------------------------------------------------|--------------------------------------------------------------------------------------------------------------------------------|------------------------------------------------------------------------------------------------------------------------------------------------------------------------------------------------------------------------------------------------------------------------------------------|
| 333   |    | locomotive,bridge,track<br>railway,bridge,steam<br>vehicle,abandoned,rust<br>track,locomotive,engine<br>engine,rail,locomotive | root-truck:ROOT<br>car-an:DET<br>car-old:AMOD<br>car-abandoned:AMOD<br>root-trucks:ROOT<br>cars-the:DET<br>passes-train:NSUBJ<br>root-cars:ROOT<br>crosses-train:NSUBJ<br>train-freight:NN<br>cars-many:AMOD<br>root-passes:ROOT<br>root-train:ROOT<br>cars-old:AMOD<br>truck-a:DET      |
| 334   |   | bike,motorcycle,race<br>motorcycle,motion,asia<br>holiday,christmas,fun<br>police,car,cars<br>motorcycle,road,sky              | bike-road:NN<br>ride-bike:NSUBJ<br>bike-mountain:NN<br>bicycle-a:DET<br>dog-basket:PREP_IN<br>bike-front:PREP_IN<br>on-road:POBJ<br>bottles-water:PREP_OF<br>basket-bike:NN<br>lane-bike:NN<br>ride-bike:NN<br>machine-green:AMOD<br>motorcycle-a:DET<br>times-a:DET<br>race-a:DET       |
| 335   |  | officers,cars,car<br>desert,portrait,california<br>colour,people,art<br>road,forest,europe<br>trip,summer,people               | stuck-sand:PREP_IN<br>car-one:NUM<br>root-cars:ROOT<br>car-black:AMOD<br>root-children:ROOT<br>street-front:PREP_IN<br>root-take:ROOT<br>car-green:AMOD<br>road-busy:AMOD<br>trucks-the:DET<br>car-yellow:AMOD<br>cars-two:NUM<br>root-stuck:ROOT<br>car-white:AMOD<br>spotted-car:NSUBJ |

Continued on next page



Table1 – continued from previous page

| Index | Image                                                                               | NUS-WIDE Concepts                                                                                                  | SBU Concepts                                                                                                                                                                                                                                                                                                                             |
|-------|-------------------------------------------------------------------------------------|--------------------------------------------------------------------------------------------------------------------|------------------------------------------------------------------------------------------------------------------------------------------------------------------------------------------------------------------------------------------------------------------------------------------------------------------------------------------|
| 336   |    | magic,green,dead<br>artist,street,black<br>rose,colors,blue<br>man,city,street<br>prison,orange,woman              | root-shrine:ROOT<br>standing-me:NSUBJ<br>man-sitting:DEP<br>women-two:NUM<br>sidewalk-<br>house:PREP_IN_FRONT_OF<br>shrine-the:DET<br>man-sitting:VMOD<br>standing-front:PREP_IN<br>root-poses:ROOT<br>woman-an:DET<br>standing-girl:NN<br>sitting-<br>house:PREP_IN_FRONT_OF<br>scene-street:NN<br>plays-girl:NSUBJ<br>sidewalk-the:DET |
| 337   |   | girl,blue,girls<br>shoes,dress,style<br>asian,girls,beautiful<br>clothes,style,red<br>images,action,sports         | dress-pink:AMOD<br>girl-street:PREP_IN<br>girls-pink:PREP_IN<br>girls-two:NUM<br>dress-the:DET<br>in-dress:POBJ<br>girl-walking:DEP<br>girl-dress:PREP_IN<br>dressed-clothes:PREP_IN<br>woman-shirt:PREP_IN<br>girl-pink:PREP_IN<br>girl-walking:VMOD<br>woman-dress:PREP_IN<br>lady-dress:PREP_IN<br>girl-the:DET                       |
| 338   |  | monks,asia,orange<br>india,culture,people<br>burma,documentary,relief<br>refugees,girl,boy<br>thailand,monks,burma | root-women:ROOT<br>group-a:DET<br>nursery-tree:NN<br>root-men:ROOT<br>carry-to:AUX<br>people-standing:VMOD<br>root-group:ROOT<br>woman-a:DET<br>trees-plant:NN<br>root-children:ROOT<br>boy-young:AMOD<br>village-a:DET<br>girls-young:AMOD<br>dress-the:DET<br>bags-plastic:AMOD                                                        |

Continued on next page

**Table1 – continued from previous page**

| Index                  | Image                                                                               | NUS-WIDE Concepts                                                                                         | SBU Concepts                                                                                                                                                                                                                                                                                                   |
|------------------------|-------------------------------------------------------------------------------------|-----------------------------------------------------------------------------------------------------------|----------------------------------------------------------------------------------------------------------------------------------------------------------------------------------------------------------------------------------------------------------------------------------------------------------------|
| 339                    |    | horses,explore,animal<br>horse,red,white<br>dust,horse,africa<br>shooting,rifles,war<br>french,war,rifles | horse-white:AMOD<br>root-horse:ROOT<br>horse-the:DET<br>pony-a:DET<br>boy-dog:CONJ_AND<br>riding-horse:DOBJ<br>bath-river:PREP_IN<br>walking-road:DOBJ<br>walking-dogs:DOBJ<br>park-mountain:NN<br>washing-river:PREP_IN<br>girl-dog:CONJ_AND<br>walking-forest:PREP_IN<br>root-man:ROOT<br>crossing-road:DOBJ |
| 340                    |   | funny,cute,nature<br>horses,portrait,animal<br>farm,animal,cow<br>pets,cat,cats<br>puppy,baby,animals     | dogs-the:DET<br>root-horse:ROOT<br>root-dogs:ROOT<br>horse-a:DET<br>building-students:PREP_BY<br>horse-the:DET<br>watching-birds:DOBJ<br>sit-to:AUX<br>site-building:PREPC_OUTSIDE<br>horses-the:DET<br>cats-black:AMOD<br>cow-the:DET<br>dog-house:PREP_IN<br>students-the:DET<br>fence-the:DET               |
| 341                    |  | toy,figures,green<br>family,girls,beauty<br>male,men,boy<br>mother,portrait,woman<br>office,people,men    | chair-girl:NN<br>girl-big:AMOD<br>boy-big:AMOD<br>girl-chair:PREP_IN<br>boy-sitting:DEP<br>bed-boy:NN<br>bed-girl:NN<br>sitting-kitchen:PREP_IN<br>chair-boy:NN<br>play-to:AUX<br>taking-bath:DOBJ<br>boy-chair:PREP_IN<br>root-loves:ROOT<br>root-grace:ROOT<br>bath-a:DET                                    |
| Continued on next page |                                                                                     |                                                                                                           |                                                                                                                                                                                                                                                                                                                |

Table1 – continued from previous page

| Index                  | Image                                                                               | NUS-WIDE Concepts                                                                                           | SBU Concepts                                                                                                                                                                                                                                                                                         |
|------------------------|-------------------------------------------------------------------------------------|-------------------------------------------------------------------------------------------------------------|------------------------------------------------------------------------------------------------------------------------------------------------------------------------------------------------------------------------------------------------------------------------------------------------------|
| 342                    |    | dog,white,explore<br>winter,canada,landscape<br>play,dog,dogs<br>pups,baby,pet<br>rabbit,sweet,pets         | snow-the:DET<br>dogs-the:DET<br>dogs-two:NUM<br>running-snow:PREP_IN<br>walking-snow:PREP_IN<br>one-dogs:PREP_OF<br>cat-street:NN<br>dog-snow:PREP_IN<br>puppy-a:DET<br>root-doggy:ROOT<br>stuff-white:AMOD<br>root-lucky:ROOT<br>old-weeks:NPADVMOD<br>house-dog:NN<br>boy-dog:CONJ_AND             |
| 343                    |   | prison,orange,woman<br>orange,light,colors<br>bus,people,england<br>president,photo,art<br>jeep,girl,army   | bus-school:NN<br>orange-the:DET<br>standing-me:NSUBJ<br>house-yellow:AMOD<br>truck-yellow:AMOD<br>house-orange:AMOD<br>box-phone:NN<br>standing-front:PREP_IN<br>box-yellow:AMOD<br>shops-the:DET<br>car-train:NN<br>building-yellow:AMOD<br>orange-white:CONJ_AND<br>in-front:POBJ<br>train-the:DET |
| 344                    |  | motorcycle,road,sky<br>bike,motorcycle,race<br>africa,desert,sand<br>shooting,rifles,war<br>boy,water,beach | bike-mountain:NN<br>biking-mountain:NN<br>race-bike:NN<br>ride-bike:NSUBJ<br>race-mountain:NN<br>tour-bike:NN<br>ride-mountain:NN<br>ride-bike:NN<br>road-dirt:NN<br>trip-bike:NN<br>walking-hill:DOBJ<br>walking-road:DOBJ<br>up-mountain:POBJ<br>race-a:DET<br>trails-the:DET                      |
| Continued on next page |                                                                                     |                                                                                                             |                                                                                                                                                                                                                                                                                                      |

Table1 – continued from previous page

| Index                  | Image                                                                               | NUS-WIDE Concepts                                                                                                             | SBU Concepts                                                                                                                                                                                                                                                                                                             |
|------------------------|-------------------------------------------------------------------------------------|-------------------------------------------------------------------------------------------------------------------------------|--------------------------------------------------------------------------------------------------------------------------------------------------------------------------------------------------------------------------------------------------------------------------------------------------------------------------|
| 345                    |    | locomotive,steam,night<br>road,city,people<br>plaza,united,clouds<br>paris,panorama,polar<br>night,moon,sky                   | black-white:CONJ_AND<br>sign-bar:NN<br>shot-black:PREP_IN<br>shot-white:PREP_IN<br>man-black:PREP_IN<br>sign-the:DET<br>black-the:DET<br>film-white:AMOD<br>potter-harry:NN<br>root-sign:ROOT<br>film-black:AMOD<br>tower-prague:PREP_IN<br>shot-white:AMOD<br>think-looks:CCOMP<br>band-rock:NN                         |
| 346                    |   | clothes,woman,beauty<br>microphones,people,fun<br>foals,music,live<br>microphones,studio,california<br>election,photo,london  | boys-kitchen:PREP_IN<br>machine-flying:AMOD<br>room-computer:NN<br>laptop-the:DET<br>in-office:POBJ<br>computer-the:DET<br>building-students:PREP_BY<br>office-home:NN<br>computer-a:DET<br>root-nap:ROOT<br>back-van:PREP_OF<br>kitchen-house:PREP_AT<br>desk-a:DET<br>video-a:DET<br>monitor-computer:NN               |
| 347                    |  | reefs,surf,beach<br>navy,ship,water<br>pacific,waves,nature<br>massachusetts,buildings,construction<br>surf,california,hawaii | middle-ocean:PREP_OF<br>boat-ocean:PREP_IN<br>boat-bay:PREP_IN<br>bay-the:DET<br>boat-water:PREP_IN<br>root-sailboat:ROOT<br>view-boat:PREP_FROM<br>ship-background:PREP_IN<br>boat-sea:PREP_IN<br>sailboat-the:DET<br>rock-water:PREP_IN<br>ocean-a:DET<br>ocean-the:DET<br>coast-island:PREP_OF<br>boat-harbor:PREP_IN |
| Continued on next page |                                                                                     |                                                                                                                               |                                                                                                                                                                                                                                                                                                                          |



**Table1 – continued from previous page**

| Index                  | Image                                                                               | NUS-WIDE Concepts                                                                                                              | SBU Concepts                                                                                                                                                                                                                                                                                                          |
|------------------------|-------------------------------------------------------------------------------------|--------------------------------------------------------------------------------------------------------------------------------|-----------------------------------------------------------------------------------------------------------------------------------------------------------------------------------------------------------------------------------------------------------------------------------------------------------------------|
| 348                    |    | roadblock,water,tree<br>shooting,rifles,war<br>colorado,vacation,aircraft<br>view>window,city<br>pennsylvania,president,beards | students-the:DET<br>horses-the:DET<br>shirt-blue:AMOD<br>building-students:PREP_BY<br>guide-tour:NN<br>pasture-a:DET<br>mountain-ridge:PREP_IN<br>mountain-loft:NN<br>up-mountain:POBJ<br>site-building:PREPC_OUTSIDE<br>root-ride:ROOT<br>pasture-cow:NN<br>plant-to:AUX<br>trip-bike:NN<br>horse-the:DET            |
| 349                    |   | dog,animals,explore<br>driver,portrait,people<br>sigma,portrait,people<br>toronto,protest,portrait<br>peace,love,portrait      | seat-back:AMOD<br>home-car:NN<br>riding-cars:PREP_IN<br>car-home:PREP_ON<br>mirror-portrait:NSUBJ<br>sitting-seat:PREP_IN<br>car-way:PREP_ON<br>home-way:NN<br>taken-mirror:PREP_IN<br>seat-car:PREP_OF<br>sitting-car:PREP_IN<br>mirror-the:DET<br>sitting-window:PREP_BY<br>girl-mirror:PREP_IN<br>boys-car:PREP_IN |
| 350                    |  | bird,sky,blue<br>dead,animal,macro<br>pond,bird,animal<br>bird,flight,water<br>wildlife,bird,birds                             | pond-the:DET<br>fish-pond:PREP_IN<br>duck-the:DET<br>heron-the:DET<br>pond-a:DET<br>water-black:AMOD<br>bird-water:PREP_IN<br>foot-a:DET<br>water-dark:AMOD<br>lake-park:PREP_AT<br>duck-a:DET<br>duck-white:AMOD<br>duck-black:AMOD<br>fish-lake:PREP_IN<br>root-duck:ROOT                                           |
| Continued on next page |                                                                                     |                                                                                                                                |                                                                                                                                                                                                                                                                                                                       |

Table1 – continued from previous page

| Index | Image                                                                               | NUS-WIDE Concepts                                                                                                  | SBU Concepts                                                                                                                                                                                                                                                                                                                 |
|-------|-------------------------------------------------------------------------------------|--------------------------------------------------------------------------------------------------------------------|------------------------------------------------------------------------------------------------------------------------------------------------------------------------------------------------------------------------------------------------------------------------------------------------------------------------------|
| 351   |    | apple,office,mac<br>mac,leopard,display<br>apple,mac,black<br>mac,black,music<br>work,office,apple                 | computer-the:DET<br>keyboard-the:DET<br>laptop-the:DET<br>root-desk:ROOT<br>desk-office:PREP_IN<br>screen-the:DET<br>root-computer:ROOT<br>computer-a:DET<br>monitor-the:DET<br>desk-computer:NN<br>desk-room:PREP_IN<br>laptop-a:DET<br>desk-new:AMOD<br>office-the:DET<br>desk-the:DET                                     |
| 352   |   | hospital,people,california<br>love,baby,cute<br>mother,portrait,woman<br>baby,beautiful,girls<br>kiss,cute,wedding | root-nap:ROOT<br>boy-bed:PREP_IN<br>chair-bag:NN<br>bed-boy:NN<br>hospital-the:DET<br>sleeping-seat:PREP_IN<br>seat-car:NN<br>girl-bed:PREP_IN<br>bed-house:PREP_IN<br>girl-baby:NN<br>asleep-seat:PREP_IN<br>sleeping-car:PREP_IN<br>in-seat:POBJ<br>home-ride:NN<br>root-charlie:ROOT                                      |
| 353   |  | action,girl,motion<br>bay,pacific,east<br>sports,water,beach<br>pool,woman,swimming<br>smile,fun,water             | riding-horse:DOBJ<br>pool-swimming:AMOD<br>woman-sitting:VMOD<br>girl-boat:PREP_IN<br>girl-bikini:PREP_IN<br>girl-water:PREP_IN<br>woman-young:NSUBJ<br>sitting-bridge:PREP_ON<br>boy-boat:PREP_IN<br>elephant-the:DET<br>sitting-tree:PREP_ON<br>boy-dog:CONJ_AND<br>root-figure:ROOT<br>woman-an:DET<br>girls-boat:PREP_IN |

Continued on next page

Table1 – continued from previous page

| Index                  | Image                                                                               | NUS-WIDE Concepts                                                                                                | SBU Concepts                                                                                                                                                                                                                                                                                    |
|------------------------|-------------------------------------------------------------------------------------|------------------------------------------------------------------------------------------------------------------|-------------------------------------------------------------------------------------------------------------------------------------------------------------------------------------------------------------------------------------------------------------------------------------------------|
| 354                    |    | dance,netherlands,holland<br>rock,music,concert<br>athlete,water,surf<br>tour,live,music<br>lights,street,people | guy-the:DET<br>root-band:ROOT<br>shirt-green:AMOD<br>girl-green:PREP_IN<br>floor-dance:NN<br>root-shoot:ROOT<br>band-rock:NN<br>stage-the:DET<br>standing-around:PRT<br>event-the:DET<br>root-guy:ROOT<br>girl-bar:PREP_IN<br>girl-pretty:AMOD<br>play-the:DET<br>shoes-white:AMOD              |
| 355                    |   | cats,kitten,pets<br>cat,eyes,kitty<br>cat,kitten,kitty<br>pet,cat,feline<br>feline,kitten,cats                   | cat-cute:AMOD<br>sleeping-box:PREP_IN<br>loves-cat:NSUBJ<br>cat-fat:AMOD<br>computer-the:DET<br>cat-gray:AMOD<br>bag-laptop:AMOD<br>cat-house:PREP_IN<br>drawer-desk:NN<br>box-new:AMOD<br>kitty-box:PREP_IN<br>likes-sit:XCOMP<br>sitting-sun:PREP_IN<br>case-a:DET<br>drawer-a:DET            |
| 356                    |  | child,social,portrait<br>baby,beautiful,girls<br>girl,eyes,face<br>kid,hope,social<br>girls,child,beauty         | bed-girl:NN<br>hat-cute:AMOD<br>blue-pink:CONJ_AND<br>girl-baby:NN<br>clothes-the:DET<br>pink-pretty:ADVMOD<br>green-pink:CONJ_AND<br>ribbon-pink:AMOD<br>cute-hat:PREP_IN<br>root-baby:ROOT<br>girl-big:AMOD<br>pink-orange:CONJ_AND<br>smile-a:DET<br>party-birthday:NN<br>pink-blue:CONJ_AND |
| Continued on next page |                                                                                     |                                                                                                                  |                                                                                                                                                                                                                                                                                                 |

Table1 – continued from previous page

| Index | Image                                                                               | NUS-WIDE Concepts                                                                                                                  | SBU Concepts                                                                                                                                                                                                                                                                                                         |
|-------|-------------------------------------------------------------------------------------|------------------------------------------------------------------------------------------------------------------------------------|----------------------------------------------------------------------------------------------------------------------------------------------------------------------------------------------------------------------------------------------------------------------------------------------------------------------|
| 357   |    | roof>window,red<br>florida,fun,boats<br>pattern,wall,urban<br>mosque,iran,prayer<br>toronto,architecture,blue                      | roof-house:PREP_OF<br>built-house:NSUBJPASS<br>tree-house:PREP_OF<br>roof-building:PREP_OF<br>house-a:DET<br>house-street:PREP_ON<br>tree-building:PREP_IN<br>tree-front:PREP_IN<br>roof-glass:NN<br>fence-the:DET<br>house-guest:NN<br>fence-iron:NN<br>tree-beautiful:AMOD<br>house-in:PREP<br>trees-bloom:PREP_IN |
| 358   |   | crowd,girl,portrait<br>center,beach,politics<br>beards,world,pennsylvania<br>president,america,party<br>environment,rally,democrat | shirt-pink:AMOD<br>guy-the:DET<br>shirt-blue:AMOD<br>shirt-red:AMOD<br>man-shirt:PREP_IN<br>me-shirt:PREP_IN<br>wearing-shirt:DOBJ<br>shirt-orange:AMOD<br>one-shirt:PREP_IN<br>at-bar:POBJ<br>guy-hat:PREP_IN<br>hats-the:DET<br>shirt-the:DET<br>girl-bar:PREP_IN<br>root-ladies:ROOT                              |
| 359   |  | driver,cars,auto<br>car,automobile,vehicle<br>scientists,science,art<br>display,apple,mac<br>tollbooth,scotland,street             | truck-a:DET<br>show-car:NN<br>root-travel:ROOT<br>back-truck:PREP_OF<br>window-rear:AMOD<br>truck-blue:AMOD<br>show-a:DET<br>bed-truck:PREP_OF<br>lot-parking:NN<br>show-car:NSUBJ<br>museum-railroad:NN<br>root-coach:ROOT<br>car-sitting:VMOD<br>seats-the:DET<br>front-car:PREP_OF                                |

Continued on next page



**Table1 – continued from previous page**

| Index | Image                                                                               | NUS-WIDE Concepts                                                                                                               | SBU Concepts                                                                                                                                                                                                                                                                                                                     |
|-------|-------------------------------------------------------------------------------------|---------------------------------------------------------------------------------------------------------------------------------|----------------------------------------------------------------------------------------------------------------------------------------------------------------------------------------------------------------------------------------------------------------------------------------------------------------------------------|
| 360   |    | airplane,pilot,fighter<br>transportation,fly,engine<br>runway,flight,aviation<br>airplane,wings,wing<br>landing,aviation,flying | museum-airplane:NN<br>may-heritage:NN<br>museum-vintage:AMOD<br>may-collection:NN<br>flying-order:DOBJ<br>airport-the:DET<br>plane-the:DET<br>truck-the:DET<br>root-sticker:ROOT<br>car-lot:PREP_IN<br>van-a:DET<br>scheme-white:AMOD<br>car-white:AMOD<br>trip-road:NN<br>wash-car:NN                                           |
| 361   |   | bike,motorcycle,race<br>bicycle,motion,girl<br>motorcycle,road,sky<br>bicycle,sky,sunset<br>road,forest,europe                  | root-ride:ROOT<br>start-the:DET<br>ride-bike:NN<br>tour-bike:NN<br>bike-front:PREP_IN<br>race-bike:NN<br>race-a:DET<br>ride-to:AUX<br>ride-bike:NSUBJ<br>bike-mountain:NN<br>shirt-yellow:AMOD<br>bicycle-a:DET<br>trailer-a:DET<br>dog-basket:PREP_IN<br>race-the:DET                                                           |
| 362   |  | texture,portrait,girl<br>outdoor,people,portrait<br>high,school,club<br>morning,people,coffee<br>square,portrait,china          | standing-wall:PREP_ON<br>root-father:ROOT<br>root-brother:ROOT<br>root-rolls:ROOT<br>root-shoot:ROOT<br>sitting-wall:PREP_ON<br>feet-bare:AMOD<br>man-sitting:DEP<br>standing-<br>wall:PREP_IN_FRONT_OF<br>boy-white:AMOD<br>building-fence:DOBJ<br>man-young:AMOD<br>standing-in:PRT<br>standing-'re:AUX<br>throwing-rocks:DOBJ |

Continued on next page

**Table1 – continued from previous page**

| Index | Image                                                                               | NUS-WIDE Concepts                                                                                                  | SBU Concepts                                                                                                                                                                                                                                                                                                |
|-------|-------------------------------------------------------------------------------------|--------------------------------------------------------------------------------------------------------------------|-------------------------------------------------------------------------------------------------------------------------------------------------------------------------------------------------------------------------------------------------------------------------------------------------------------|
| 363   |    | bunny,pink,toy<br>wedding, cake, flowers<br>kitchen, pink, toys<br>groom, flowers, cake<br>cottage, vintage, pink  | flowers-fresh:AMOD<br>cake-fruit:NN<br>decorated-flowers:PREP_WITH<br>cake-pink:AMOD<br>fondant-white:AMOD<br>cake-vanilla:NN<br>cake-birthday:NN<br>cake-box:PREP_IN<br>pot-tea:NN<br>cake-white:AMOD<br>root-roses:ROOT<br>root-tea:ROOT<br>shelf-kitchen:PREP_IN<br>root-gift:ROOT<br>sign-table:PREP_IN |
| 364   |   | horses, explore, animal<br>horse, red, white<br>horse, argentina, field<br>foals, horse, mare<br>texas, war, field | horses-the:DET<br>horse-a:DET<br>horse-the:DET<br>root-horses:ROOT<br>root-horse:ROOT<br>horse-black:AMOD<br>girls-the:DET<br>cow-a:DET<br>riding-horse:DOBJ<br>horse-field:PREP_IN<br>cow-the:DET<br>grass-lush:AMOD<br>field-baseball:NN<br>security-the:DET<br>plant-tree:DOBJ                           |
| 365   |  | sand, nature, desert<br>shore, rocks, blue<br>wild, bird, birds<br>tortoise, park, sea<br>seascape, coast, rocks   | root-turtle:ROOT<br>guy-little:AMOD<br>bird-dead:AMOD<br>fish-dead:AMOD<br>pigeon-a:DET<br>root-snake:ROOT<br>root-rests:ROOT<br>turtle-a:DET<br>root-turtles:ROOT<br>spotted-bird:DOBJ<br>root-salmon:ROOT<br>park-golden:NN<br>duck-a:DET<br>root-frog:ROOT<br>barbara-santa:NN                           |

Continued on next page

**Table1 – continued from previous page**

| Index | Image                                                                               | NUS-WIDE Concepts                                                                                                               | SBU Concepts                                                                                                                                                                                                                                                                                                           |
|-------|-------------------------------------------------------------------------------------|---------------------------------------------------------------------------------------------------------------------------------|------------------------------------------------------------------------------------------------------------------------------------------------------------------------------------------------------------------------------------------------------------------------------------------------------------------------|
| 366   |    | design,interior,furniture<br>doorway,red,abandoned<br>chair,room,office<br>modern,interior,furniture<br>floor>window,interior   | doors-glass:NN<br>door-cat:NN<br>door-front:AMOD<br>door-house:PREP_OF<br>looking-door:DOBJ<br>root-cabinet:ROOT<br>door-kitchen:NN<br>microwave-the:DET<br>looking-room:PREP_INTO<br>standing-door:PREP_IN<br>doorway-the:DET<br>window-bedroom:PREP_IN<br>cabinet-the:DET<br>heater-water:NN<br>door-room:PREP_IN    |
| 367   |   | democrat,beach,election<br>cafe,bar,street<br>classroom,california,apple<br>underground,people,street<br>subway,people,graffiti | classroom-the:DET<br>one-shirt:PREP_IN<br>lab-computer:NN<br>waiting-line:PREP_IN<br>door-dag:DEP<br>lobby-the:DET<br>seats-the:DET<br>market-largest:AMOD<br>shirt-brown:AMOD<br>game-the:DET<br>area-floor:NN<br>shirt-the:DET<br>car-dining:NN<br>train-sky:NN<br>standing-around:PRT                               |
| 368   |  | signs,asia,japan<br>running,cheering,city<br>road,city,people<br>subway,people,graffiti<br>roadblock,protest,london             | cross-street:DOBJ<br>street-busy:AMOD<br>market-house:PREP_NEAR<br>street-typical:AMOD<br>shops-the:DET<br>street-market:NN<br>street-shopping:NN<br>walking-street:PREP_ON<br>street-city:PREP_IN<br>parade-the:DET<br>street-house:PREP_NEAR<br>motorcycle-a:DET<br>man-an:DET<br>street-the:DET<br>people-many:AMOD |

Continued on next page

Table1 – continued from previous page

| Index                  | Image                                                                               | NUS-WIDE Concepts                                                                                              | SBU Concepts                                                                                                                                                                                                                                                                                                                 |
|------------------------|-------------------------------------------------------------------------------------|----------------------------------------------------------------------------------------------------------------|------------------------------------------------------------------------------------------------------------------------------------------------------------------------------------------------------------------------------------------------------------------------------------------------------------------------------|
| 369                    |    | cake,groom,party<br>design,light,red<br>meeting,office,war<br>book,dog,funny<br>child,boys,people              | cake-birthday:NN<br>root-brother:ROOT<br>candles-the:DET<br>girl-birthday:NN<br>party-birthday:NN<br>sitting-desk:PREP_AT<br>ceremony-the:DET<br>candle-the:DET<br>party-the:DET<br>reception-the:DET<br>girl-pink:AMOD<br>chris-girls:CONJ_AND<br>cup-tea:PREP_OF<br>chris-uncle:NN<br>girls-kitchen:PREP_IN                |
| 370                    |   | sails,sunset,ocean<br>sailboat,ship,blue<br>wonderful,water,sea<br>sailing,sunset,sailboat<br>ocean,sand,beach | sail-the:DET<br>root-sail:ROOT<br>boat-background:PREP_IN<br>boat-sail:AMOD<br>boats-sail:AMOD<br>sailboat-the:DET<br>ship-background:PREP_IN<br>tour-boat:NN<br>taxi-water:NN<br>sail-to:AUX<br>boat-water:PREP_IN<br>boat-harbor:PREP_IN<br>ride-boat:NN<br>beach-house:PREP_NEAR<br>boats-two:NUM                         |
| 371                    |  | waves,surf,wave<br>boy,water,beach<br>water,ocean,beach<br>cliff,rock,sand<br>beauty,asia,japan                | catch-fish:DOBJ<br>standing-rock:PREP_ON<br>playing-boy:NN<br>boy-water:PREP_IN<br>water-cold:AMOD<br>man-dog:CONJ_AND<br>waves-the:DET<br>water-beach:PREP_AT<br>playing-water:PREP_IN<br>superior-lake:NN<br>rocks-water:PREP_IN<br>washing-river:PREP_IN<br>swimming-water:PREP_IN<br>enjoying-water:DOBJ<br>catch-to:AUX |
| Continued on next page |                                                                                     |                                                                                                                |                                                                                                                                                                                                                                                                                                                              |



Table1 – continued from previous page

| Index                  | Image                                                                               | NUS-WIDE Concepts                                                                                                    | SBU Concepts                                                                                                                                                                                                                                                                                               |
|------------------------|-------------------------------------------------------------------------------------|----------------------------------------------------------------------------------------------------------------------|------------------------------------------------------------------------------------------------------------------------------------------------------------------------------------------------------------------------------------------------------------------------------------------------------------|
| 372                    |    | dogs,funny,cute<br>pups,baby,pet<br>soft,animal,pet<br>pets,cat,cats<br>puppy,baby,animals                           | sleeping-car:PREP_IN<br>root-cats:ROOT<br>taking-nap:DOBJ<br>playing-basket:PREP_IN<br>nap-a:DET<br>sleeping-box:PREP_IN<br>bag-laptop:AMOD<br>sleeping-sun:PREP_IN<br>box-shoe:NN<br>seat-back:AMOD<br>root-puppies:ROOT<br>root-puppy:ROOT<br>seat-passenger:NN<br>girl-bed:PREP_IN<br>desk-computer:NN  |
| 373                    |   | home,portrait,blue<br>county,beach,florida<br>center,beach,politics<br>toronto,protest,portrait<br>design,light,red  | shirt-white:AMOD<br>wearing-shirt:DOBJ<br>girls-all:PREDET<br>me-shirt:PREP_IN<br>girls-standing:DEP<br>dress-fancy:AMOD<br>shirt-new:AMOD<br>shirt-a:DET<br>me-house:PREP_IN<br>root-birthday:ROOT<br>girl-birthday:NN<br>sitting-desk:PREP_AT<br>girl-wedding:PREP_IN<br>at-bar:POBJ<br>took-house:NSUBJ |
| 374                    |  | bicycle,china,color<br>motorcycle,road,sky<br>race,bike,politics<br>colorful,animal,beautiful<br>holland,dance,light | race-bike:NN<br>race-mountain:NN<br>race-the:DET<br>race-cup:NN<br>seat-bike:NN<br>root-race:ROOT<br>race-a:DET<br>tri-sprint:NN<br>trail-river:NN<br>trail-nlr:NN<br>tri-swim:PREP_WITH<br>swim-run:CONJ_AND<br>bike-trail:PREP_ON<br>swim-lake:PREP_IN<br>motorcycle-a:DET                               |
| Continued on next page |                                                                                     |                                                                                                                      |                                                                                                                                                                                                                                                                                                            |

**Table1 – continued from previous page**

| Index                  | Image                                                                               | NUS-WIDE Concepts                                                                                                             | SBU Concepts                                                                                                                                                                                                                                                                                                      |
|------------------------|-------------------------------------------------------------------------------------|-------------------------------------------------------------------------------------------------------------------------------|-------------------------------------------------------------------------------------------------------------------------------------------------------------------------------------------------------------------------------------------------------------------------------------------------------------------|
| 375                    |    | abandoned,truck,car<br>grass,cow,field<br>shoes,white,blue<br>film,nature,landscape<br>grass,macro,flowers                    | car-toy:NN<br>accident-car:NN<br>root-stuck:ROOT<br>car-yellow:AMOD<br>puddle-a:DET<br>cars-many:AMOD<br>walking-home:DOBJ<br>cars-two:NUM<br>car-blue:AMOD<br>lot-the:DET<br>ball-yellow:AMOD<br>root-ball:ROOT<br>side-road:NN<br>patch-grass:PREP_OF<br>trees-plant:NN                                         |
| 376                    |   | snow,tree,trees<br>blue,architecture,building<br>winter,water,sky<br>cold,trees,sky<br>frozen,trees,lake                      | truck-old:AMOD<br>root-truck:ROOT<br>car-abandoned:AMOD<br>truck-an:DET<br>truck-field:PREP_IN<br>car-field:PREP_IN<br>car-old:AMOD<br>truck-rusty:AMOD<br>root-trucks:ROOT<br>root-car:ROOT<br>car-waiting:VMOD<br>jam-traffic:NN<br>car-an:DET<br>root-winter:ROOT<br>reflection-building:PREP_OF               |
| 377                    |  | book,dog,funny<br>pakistan,earthquake,adventure<br>buddhism,monks,people<br>ties,glasses,band<br>massachusetts,people,running | cake-birthday:NN<br>bottle-wine:PREP_OF<br>root-dinner:ROOT<br>girls-kitchen:PREP_IN<br>root-breakfast:ROOT<br>book-the:DET<br>girls-house:PREP_IN<br>candle-the:DET<br>paper-the:DET<br>house-grandparents:POSS<br>staff-the:DET<br>wine-red:AMOD<br>house-gingerbread:AMOD<br>lunch-a:DET<br>girl-house:PREP_IN |
| Continued on next page |                                                                                     |                                                                                                                               |                                                                                                                                                                                                                                                                                                                   |

Table1 – continued from previous page

| Index | Image                                                                               | NUS-WIDE Concepts                                                                                                     | SBU Concepts                                                                                                                                                                                                                                                                                                   |
|-------|-------------------------------------------------------------------------------------|-----------------------------------------------------------------------------------------------------------------------|----------------------------------------------------------------------------------------------------------------------------------------------------------------------------------------------------------------------------------------------------------------------------------------------------------------|
| 378   |    | dark,lights,city<br>lights,colors,color<br>darkness,red,nighttime<br>bus,light,lights<br>driver,spain,night           | light-blue:AMOD<br>lights-blue:AMOD<br>light-up:PRT<br>exposure-long:AMOD<br>lights-car:NN<br>lights-red:AMOD<br>lights-green:AMOD<br>night-the:DET<br>exposure-a:DET<br>lights-white:AMOD<br>lights-christmas:NN<br>light-yellow:AMOD<br>lights-street:NN<br>buuren-van:NN<br>stage-the:DET                   |
| 379   |   | cat,kitten,kitty<br>adorable,rabbit,bunny<br>pet,dog,rabbit<br>cats,kitten,pets<br>kitty,orange,cats                  | likes-sit:XCOMP<br>house-parent:POSS<br>cat-orange:AMOD<br>taking-nap:DOBJ<br>root-sleeps:ROOT<br>cats-the:DET<br>towels-the:DET<br>root-buddy:ROOT<br>middle-floor:PREP_OF<br>cat-lives:RCMOD<br>sleeping-box:PREP_IN<br>root-kittens:ROOT<br>chair-office:PREP_IN<br>bear-house:PREP_IN<br>shelter-animal:NN |
| 380   |  | locomotive,steam,night<br>steam,railroad,rail<br>gun,rifles,soldiers<br>locomotive,steam,china<br>military,tanks,army | train-steam:NN<br>cars-old:AMOD<br>car-old:AMOD<br>show-car:NN<br>root-trucks:ROOT<br>train-old:AMOD<br>truck-ford:NN<br>root-car:ROOT<br>root-truck:ROOT<br>car-train:NN<br>parked-truck:NSUBJ<br>root-train:ROOT<br>trucks-the:DET<br>van-door:DEP<br>truck-a:DET                                            |

Continued on next page

**Table1 – continued from previous page**

| Index                  | Image                                                                               | NUS-WIDE Concepts                                                                                                                        | SBU Concepts                                                                                                                                                                                                                                                                                          |
|------------------------|-------------------------------------------------------------------------------------|------------------------------------------------------------------------------------------------------------------------------------------|-------------------------------------------------------------------------------------------------------------------------------------------------------------------------------------------------------------------------------------------------------------------------------------------------------|
| 381                    | 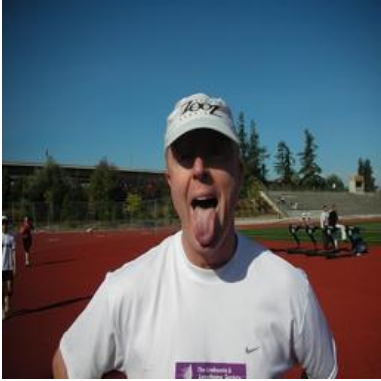   | home,portrait,blue<br>interesting,portrait,people<br>design,light,red<br>morning,people,coffee<br>holiday,christmas,fun                  | wearing-shirt:DOBJ<br>boat-lake:PREP_ON<br>standing-bridge:PREP_ON<br>had-girl:NSUBJ<br>ride-a:DET<br>house-background:PREP_IN<br>portrait-a:DET<br>hat-paper:NN<br>ride-bike:NN<br>hat-white:AMOD<br>spent-house:PREP_AT<br>trip-boat:NN<br>picture-me:PREP_OF<br>boy-white:AMOD<br>ride-mountain:NN |
| 382                    |   | hangar,aviation,aircraft<br>fisheye,architecture,city<br>judge,car,automobile<br>aviation,fighter,california<br>austin,motorcycle,police | mall-a:DET<br>show-the:DET<br>car-street:PREP_ON<br>scheme-black:AMOD<br>cars-two:NUM<br>station-street:NN<br>root-show:ROOT<br>scheme-white:AMOD<br>airport-the:DET<br>car-one:NUM<br>show-car:NSUBJ<br>wheel-the:DET<br>subway-the:DET<br>show-tv:NN<br>colors-white:AMOD                           |
| 383                    |  | goat,cheese,cat<br>feline,kitten,animals<br>cat,kitten,kitty<br>kitty,orange,cats<br>rabbit,sweet,pets                                   | bag-a:DET<br>cat-tree:PREP_UNDER<br>bag-the:DET<br>nap-a:DET<br>wrapping-paper:DOBJ<br>bags-the:DET<br>basket-a:DET<br>cute-dog:DOBJ<br>pig-the:DET<br>cat-bag:PREP_IN<br>sleeping-basket:PREP_IN<br>sleeping-box:PREP_IN<br>root-cats:ROOT<br>root-doggy:ROOT<br>root-dogs:ROOT                      |
| Continued on next page |                                                                                     |                                                                                                                                          |                                                                                                                                                                                                                                                                                                       |



Table1 – continued from previous page

| Index                  | Image                                                                               | NUS-WIDE Concepts                                                                                                         | SBU Concepts                                                                                                                                                                                                                                                                     |
|------------------------|-------------------------------------------------------------------------------------|---------------------------------------------------------------------------------------------------------------------------|----------------------------------------------------------------------------------------------------------------------------------------------------------------------------------------------------------------------------------------------------------------------------------|
| 384                    |    | cow,animals,nose<br>summer,river,sea<br>goat,portrait,zoo<br>animals,africa,deer<br>horns,goat,scotland                   | cow-a:DET<br>root-cow:ROOT<br>sheep-a:DET<br>root-goat:ROOT<br>farm-a:DET<br>cow-field:PREP_IN<br>root-head:ROOT<br>head-a:DET<br>market-animal:NN<br>trip-pizza:CONJ_AND<br>sheep-the:DET<br>lion-the:DET<br>beach-dog:NN<br>horses-white:AMOD<br>took-beach:PREP_TO            |
| 385                    |   | railroad,locomotive,steam<br>train,engine,steam<br>engine,rail,locomotive<br>rail,engine,steam<br>locomotive,bridge,track | train-a:DET<br>train-car:NN<br>car-train:NN<br>train-an:DET<br>train-old:AMOD<br>train-the:DET<br>yard-train:NN<br>train-freight:NN<br>root-train:ROOT<br>car-railroad:NN<br>passes-train:NSUBJ<br>root-passes:ROOT<br>mill-paper:NN<br>root-heads:ROOT<br>cars-train:NN         |
| 386                    |  | trip,summer,people<br>square,portrait,china<br>iran,portrait,girl<br>colorful,animal,beautiful<br>wood,art,brown          | eat-to:AUX<br>table-water:NN<br>candles-the:DET<br>boy-car:PREP_IN<br>box-sand:NN<br>playing-box:PREP_IN<br>take-home:DOBJ<br>leaf-banana:NN<br>plate-a:DET<br>shirt-an:DET<br>juice-orange:AMOD<br>leaves-banana:NN<br>bowl-fruit:NN<br>root-reads:ROOT<br>sitting-seat:PREP_IN |
| Continued on next page |                                                                                     |                                                                                                                           |                                                                                                                                                                                                                                                                                  |

Table1 – continued from previous page

| Index | Image                                                                               | NUS-WIDE Concepts                                                                                                          | SBU Concepts                                                                                                                                                                                                                                                                             |
|-------|-------------------------------------------------------------------------------------|----------------------------------------------------------------------------------------------------------------------------|------------------------------------------------------------------------------------------------------------------------------------------------------------------------------------------------------------------------------------------------------------------------------------------|
| 387   |    | motorcycle,road,sky<br>motorcycle,netherlands,nederland<br>bike,motorcycle,race<br>sport,race,car<br>formula,classic,sport | motorcycle-a:DET<br>basket-bike:NN<br>race-a:DET<br>race-bike:NN<br>bike-mountain:NN<br>race-the:DET<br>dog-basket:PREP_IN<br>race-mountain:NN<br>show-tv:NN<br>race-cup:NN<br>bike-front:PREP_IN<br>bike-road:NN<br>seat-bike:NN<br>train-station:DOBJ<br>bicycle-a:DET                 |
| 388   |   | funny,cute,nature<br>soft,animal,pet<br>dogs,funny,cute<br>kitty,orange,cats<br>cute,dog,puppy                             | sleeping-sun:PREP_IN<br>sit-to:AUX<br>root-cats:ROOT<br>pillow-a:DET<br>nap-a:DET<br>cats-the:DET<br>cats-black:AMOD<br>cute-being:COP<br>chair-computer:NN<br>loves-cat:NSUBJ<br>root-loves:ROOT<br>dog-box:PREP_IN<br>home-the:DET<br>loves-sit:XCOMP<br>dog-house:PREP_IN             |
| 389   |  | president,photo,art<br>cellphones,people,street<br>males,room,furniture<br>suits,street,black<br>clothing,clothes,canada   | standing-way:PREP_IN<br>in-front:POBJ<br>job-a:DET<br>apartments-the:DET<br>train-middle:PREP_IN<br>house-beach:NN<br>bus-tour:NN<br>root-van:ROOT<br>root-standing:ROOT<br>van-the:DET<br>coach-a:DET<br>house-beach:PREP_IN<br>grill-the:DET<br>root-ladies:ROOT<br>stuck-sand:PREP_IN |

Continued on next page

**Table1 – continued from previous page**

| Index | Image                                                                               | NUS-WIDE Concepts                                                                                                   | SBU Concepts                                                                                                                                                                                                                                                                                                          |
|-------|-------------------------------------------------------------------------------------|---------------------------------------------------------------------------------------------------------------------|-----------------------------------------------------------------------------------------------------------------------------------------------------------------------------------------------------------------------------------------------------------------------------------------------------------------------|
| 390   |    | birds,wings,white<br>fishing,fish,lake<br>outdoors,wildlife,beautiful<br>water,ocean,beach<br>pond,bird,animal      | birds-water:NN<br>ducks-lake:PREP_IN<br>swimming-ducks:NSUBJ<br>root-seagulls:ROOT<br>root-ducks:ROOT<br>ducks-river:PREP_IN<br>root-swans:ROOT<br>ducks-all:PREDET<br>shore-lake:PREP_OF<br>flying-water:PREP_OVER<br>duck-white:AMOD<br>water-shallow:AMOD<br>ducks-water:PREP_IN<br>root-flock:ROOT<br>group-a:DET |
| 391   |   | child,boys,people<br>friend,girl,happy<br>stadium,game,people<br>smile,asia,boy<br>football,fan,berlin              | girl-wedding:PREP_IN<br>wearing-shirt:DOBJ<br>playing-grass:PREP_IN<br>in-shirt:POBJ<br>girls-sitting:VMOD<br>root-sister:ROOT<br>looked-cute:ACOMP<br>girl-happy:AMOD<br>sitting-grass:PREP_ON<br>grass-park:PREP_IN<br>chair-girl:NN<br>boy-shirt:PREP_IN<br>box-sand:NN<br>girl-cute:AMOD<br>cute-boy:DOBJ         |
| 392   |  | locomotive,bridge,track<br>scenery,water,trees<br>barge,harbour,sea<br>china,water,landscape<br>signs,australia,nsw | train-freight:NN<br>crosses-train:NSUBJ<br>covered-bridge:DOBJ<br>root-train:ROOT<br>river-salmon:NN<br>bridge-lake:DOBJ<br>house-boat:NN<br>runs-river:NSUBJ<br>station-power:NN<br>stretch-a:DET<br>cold-very:ADVMOD<br>ground-fore:NN<br>passes-as:MARK<br>house-winter:PREP_IN<br>house-mountains:PREP_IN         |

Continued on next page

Table1 – continued from previous page

| Index | Image                                                                               | NUS-WIDE Concepts                                                                                                           | SBU Concepts                                                                                                                                                                                                                                                                                           |
|-------|-------------------------------------------------------------------------------------|-----------------------------------------------------------------------------------------------------------------------------|--------------------------------------------------------------------------------------------------------------------------------------------------------------------------------------------------------------------------------------------------------------------------------------------------------|
| 393   |    | bike,motorcycle,race<br>motorcycle,motion,asia<br>motorcycle,road,sky<br>sport,race,car<br>motorcycle,netherlands,nederland | ride-bike:DOBJ<br>bike-front:PREP_IN<br>bike-road:NN<br>motorcycle-a:DET<br>ride-bike:NSUBJ<br>race-bike:NN<br>dog-basket:PREP_IN<br>race-a:DET<br>trip-bike:NN<br>race-mountain:NN<br>bike-mountain:NN<br>ride-to:AUX<br>bicycle-a:DET<br>biking-mountain:NN<br>tree-shoe:NN                          |
| 394   |   | lines,wall,shadow<br>concrete,wall,abstract<br>composition,abstract,geometry<br>sidewalk,yellow,wet<br>geometry,white,red   | sidewalk-the:DET<br>pavement-the:DET<br>tiles-floor:NN<br>floor-bathroom:NN<br>root-crack:ROOT<br>root-floor:ROOT<br>floor-the:DET<br>lines-the:DET<br>ground-the:DET<br>root-lines:ROOT<br>sidewalk-a:DET<br>glass-broken:AMOD<br>root-damage:ROOT<br>floor-bathroom:PREP_IN<br>floor-kitchen:PREP_IN |
| 395   |  | washington,seattle,art<br>adults,furniture,outdoors<br>engine,art,nature<br>agent,fashion,film<br>atlanta,woman,costume     | sit-chair:PREP_IN<br>office-home:NN<br>in-office:POBJ<br>reading-book:DOBJ<br>root-seat:ROOT<br>help-to:AUX<br>piece-the:DET<br>student-a:DET<br>root-figure:ROOT<br>chair-room:PREP_IN<br>boy-birthday:NN<br>bag-blue:AMOD<br>root-pants:ROOT<br>on-floor:POBJ<br>bed-boy:NN                          |

Continued on next page



Table1 – continued from previous page

| Index | Image                                                                               | NUS-WIDE Concepts                                                                                                      | SBU Concepts                                                                                                                                                                                                                                                                                     |
|-------|-------------------------------------------------------------------------------------|------------------------------------------------------------------------------------------------------------------------|--------------------------------------------------------------------------------------------------------------------------------------------------------------------------------------------------------------------------------------------------------------------------------------------------|
| 396   |    | silver,car,street<br>small,big,man<br>sport,race,car<br>hangar,aviation,aircraft<br>wow,light,people                   | root-car:ROOT<br>car-street:PREP_IN<br>cars-many:AMOD<br>car-vintage:AMOD<br>parked-car:NSUBJ<br>parked-street:PREP_IN<br>cars-two:NUM<br>parked-street:PREP_ON<br>spotted-car:NSUBJ<br>car-street:PREP_ON<br>car-white:AMOD<br>car-old:AMOD<br>one-cars:PREP_OF<br>garage-a:DET<br>dogs-two:NUM |
| 397   |   | houseboat,summer>window<br>adventure,river,trip<br>barge,france,scotland<br>display,apple,mac<br>prison,film,abandoned | stove-house:PREP_IN<br>kitchen-a:DET<br>desk-new:AMOD<br>tank-the:DET<br>tub-hot:AMOD<br>stove-kitchen:PREP_IN<br>box-the:DET<br>sink-kitchen:PREP_IN<br>bed-truck:NN<br>desk-office:NN<br>root-machine:ROOT<br>pipe-water:NN<br>root-tub:ROOT<br>machine-old:AMOD<br>silver-the:DET             |
| 398   |  | paintings,birds,paint<br>wings,bird,sky<br>cemetery,statue,angel<br>square,portrait,china<br>trip,summer,people        | seat-car:NN<br>floor-tower:PREP_IN<br>root-skull:ROOT<br>car-abandoned:AMOD<br>me-car:PREP_IN<br>window-church:PREP_AT<br>painting-wall:NN<br>in-seat:POBJ<br>seats-car:NN<br>glass-window:NN<br>door-car:NN<br>floor-glass:NN<br>root-shrine:ROOT<br>girl-mirror:PREP_IN<br>home-ride:NN        |

Continued on next page

**Table1 – continued from previous page**

| Index                  | Image                                                                               | NUS-WIDE Concepts                                                                                                                   | SBU Concepts                                                                                                                                                                                                                                                                                              |
|------------------------|-------------------------------------------------------------------------------------|-------------------------------------------------------------------------------------------------------------------------------------|-----------------------------------------------------------------------------------------------------------------------------------------------------------------------------------------------------------------------------------------------------------------------------------------------------------|
| 399                    |    | car,automobile,truck<br>auto,automobile,race<br>vehicle,cars,speed<br>automobile,ontario,speed<br>speed,racing,car                  | car-rental:AMOD<br>parked-street:PREP_ON<br>one-cars:PREP_OF<br>car-street:PREP_IN<br>car-new:AMOD<br>warehouse-brick:NN<br>parked-car:NSUBJ<br>car-french:AMOD<br>car-the:DET<br>spotted-car:NSUBJ<br>seat-driver:POSS<br>car-little:AMOD<br>car-classic:AMOD<br>cars-many:AMOD<br>show-building:PREP_AT |
| 400                    |   | formula,classic,sport<br>vintage,car,classic<br>classic,automobile,red<br>car,automobile,truck<br>antique,car,truck                 | show-car:NN<br>show-car:NSUBJ<br>car-classic:AMOD<br>root-show:ROOT<br>car-old:AMOD<br>truck-the:DET<br>cars-old:AMOD<br>truck-ford:NN<br>root-car:ROOT<br>truck-red:AMOD<br>building-britannic:AMOD<br>show-a:DET<br>cars-the:DET<br>one-cars:PREP_OF<br>root-truck:ROOT                                 |
| 401                    |  | airplane,pilot,fighter<br>airforce,museum,flag<br>aircraft,pilot,fighter<br>transportation,blue,airplane<br>airplanes,navy,aviation | building-ferry:NN<br>yellow-blue:CONJ_AND<br>background-blue:AMOD<br>tail-the:DET<br>light-traffic:NN<br>root-faucet:ROOT<br>television-the:DET<br>portrait-self:NN<br>black-blue:CONJ_AND<br>lens-the:DET<br>blue-a:DET<br>root-show:ROOT<br>sky-sunny:AMOD<br>truck-a:DET<br>ball-plastic:AMOD          |
| Continued on next page |                                                                                     |                                                                                                                                     |                                                                                                                                                                                                                                                                                                           |

Table1 – continued from previous page

| Index | Image                                                                               | NUS-WIDE Concepts                                                                                                         | SBU Concepts                                                                                                                                                                                                                                                                                                          |
|-------|-------------------------------------------------------------------------------------|---------------------------------------------------------------------------------------------------------------------------|-----------------------------------------------------------------------------------------------------------------------------------------------------------------------------------------------------------------------------------------------------------------------------------------------------------------------|
| 402   |    | colourful,color,colours<br>president,politicians,hope<br>christmas,dog,family<br>hats,cute,handmade<br>pottery,home,retro | wrapping-paper:DOBJ<br>cake-birthday:NN<br>root-food:ROOT<br>candles-the:DET<br>fish-fresh:AMOD<br>house-gingerbread:AMOD<br>plate-the:DET<br>root-birthday:ROOT<br>root-breakfast:ROOT<br>animals-stuffed:AMOD<br>root-dinner:ROOT<br>party-birthday:NN<br>cake-velvet:NN<br>market-food:NN<br>girls-kitchen:PREP_IN |
| 403   |   | maps,street,city<br>cake,groom,party<br>wedding,cake,flowers<br>shops,fun,florida<br>cheese,night,smile                   | plate-a:DET<br>house-gingerbread:AMOD<br>cake-birthday:NN<br>table-room:PREP_IN<br>root-lunch:ROOT<br>cloth-a:DET<br>staff-the:DET<br>cake-box:PREP_IN<br>root-breakfast:ROOT<br>root-dinner:ROOT<br>table-house:PREP_IN<br>made-home:NSUBJ<br>market-market:APPOS<br>root-complete:ROOT<br>all-floor:PREP_OVER       |
| 404   |  | pet,dog,puppy<br>dogs,funny,cute<br>shooting,studio,playing<br>pets,pups,dog<br>sitting,cat,animal                        | cat-black:AMOD<br>chair-office:NN<br>table-kitchen:NN<br>horse-black:AMOD<br>cat-grey:AMOD<br>chair-computer:NN<br>dog-black:AMOD<br>cats-the:DET<br>leather-black:AMOD<br>dog-house:PREP_IN<br>root-sleeps:ROOT<br>root-horse:ROOT<br>cats-black:AMOD<br>face-to:AUX<br>move-to:AUX                                  |

Continued on next page

Table1 – continued from previous page

| Index                  | Image                                                                               | NUS-WIDE Concepts                                                                                                 | SBU Concepts                                                                                                                                                                                                                                                                                                         |
|------------------------|-------------------------------------------------------------------------------------|-------------------------------------------------------------------------------------------------------------------|----------------------------------------------------------------------------------------------------------------------------------------------------------------------------------------------------------------------------------------------------------------------------------------------------------------------|
| 405                    |    | caribou,arctic,water<br>elephants,sunset,travel<br>alaska,sheep,wildlife<br>nsw,coast,beach<br>deer,handmade,cute | cross-river:DOBJ<br>bed-river:NN<br>middle-river:PREP_OF<br>horses-white:AMOD<br>buffalo-water:NN<br>snow-ground:PREP_ON<br>root-sheep:ROOT<br>hole-water:NN<br>launch-boat:NN<br>river-mountain:NN<br>cow-the:DET<br>man-dog:CONJ_AND<br>horses-wild:AMOD<br>runs-river:NSUBJ<br>river-park:PREP_IN                 |
| 406                    |   | fall,park,water<br>sigma,portrait,people<br>adults,suits,room<br>pictures,fun,friends<br>human,school,photo       | boys-kitchen:PREP_IN<br>shirt-brown:AMOD<br>shirt-black:AMOD<br>van-60mm:NUM<br>shirt-blue:AMOD<br>root-father:ROOT<br>pants-black:AMOD<br>computer-a:DET<br>girls-kitchen:PREP_IN<br>girl-boy:CONJ_AND<br>man-shirt:PREP_IN<br>jacket-black:AMOD<br>root-family:ROOT<br>shirt-yellow:AMOD<br>room-green:AMOD        |
| 407                    |  | desert,cactus,sunset<br>sand,waves,blue<br>adult,blue,outdoor<br>mexico,beach,ocean<br>booby,animals,wildlife     | pug-parker:APPOS<br>spaniel-pug:CONJ_AND<br>walking-beach:DOBJ<br>inlaws-pug:CONJ_AND<br>bird-the:DET<br>sand-the:DET<br>sand-beach:PREP_AT<br>sitting-sand:PREP_IN<br>walking-beach:PREP_ON<br>bird-blue:AMOD<br>feet-the:DET<br>walking-sand:PREP_IN<br>sitting-beach:PREP_ON<br>bird-little:AMOD<br>beach-the:DET |
| Continued on next page |                                                                                     |                                                                                                                   |                                                                                                                                                                                                                                                                                                                      |



**Table1 – continued from previous page**

| Index                  | Image                                                                               | NUS-WIDE Concepts                                                                                                                  | SBU Concepts                                                                                                                                                                                                                                                                                                                      |
|------------------------|-------------------------------------------------------------------------------------|------------------------------------------------------------------------------------------------------------------------------------|-----------------------------------------------------------------------------------------------------------------------------------------------------------------------------------------------------------------------------------------------------------------------------------------------------------------------------------|
| 408                    |    | design,interior,furniture<br>kitchen,interior,design<br>interior,furniture,house<br>carpet,room,chair<br>studio,microphones,office | room-living:AMOD<br>standing-kitchen:PREP_IN<br>dining-room:DOBJ<br>room-living:NN<br>root-downstairs:ROOT<br>living-room:DOBJ<br>room-great:AMOD<br>looking-room:PREP_INTO<br>room-new:AMOD<br>room-family:NN<br>room-kitchen:CONJ_AND<br>in-room:POBJ<br>room-dining:NN<br>bedroom-house:PREP_OF<br>bedroom-the:DET             |
| 409                    |   | locomotive,steam,night<br>abandoned,truck,car<br>engine,art,nature<br>navy,airforce,airplane<br>tanks,texas,state                  | window-shop:NN<br>window-store:NN<br>black-the:DET<br>display-window:NSUBJ<br>store-an:DET<br>window-store:PREP_OF<br>window-broken:AMOD<br>museum-railroad:NN<br>train-steam:NN<br>machine-old:AMOD<br>root-graffiti:ROOT<br>cage-the:DET<br>root-train:ROOT<br>cage-bird:NN<br>railway-valley:NN                                |
| 410                    |  | road,forest,europe<br>shooting,model,portrait<br>train,sky,city<br>rock,stone,green<br>island,travel,bird                          | rock-castle:NN<br>river-background:PREP_IN<br>lake-background:PREP_IN<br>ground-back:AMOD<br>on-bridge:POBJ<br>top-hill:PREP_OF<br>boy-local:AMOD<br>background-the:DET<br>balcony-the:DET<br>beach-background:PREP_IN<br>beach-green:AMOD<br>at-beach:POBJ<br>overlooking-ocean:DOBJ<br>rock-background:PREP_IN<br>coast-the:DET |
| Continued on next page |                                                                                     |                                                                                                                                    |                                                                                                                                                                                                                                                                                                                                   |

**Table1 – continued from previous page**

| Index | Image                                                                               | NUS-WIDE Concepts                                                                                             | SBU Concepts                                                                                                                                                                                                                                                                                                            |
|-------|-------------------------------------------------------------------------------------|---------------------------------------------------------------------------------------------------------------|-------------------------------------------------------------------------------------------------------------------------------------------------------------------------------------------------------------------------------------------------------------------------------------------------------------------------|
| 411   |    | office,apple,mac<br>work,office,apple<br>apple,office,mac<br>display,apple,mac<br>mac,office,photography      | tv-screen:NN<br>office-new:AMOD<br>screen-big:AMOD<br>lab-the:DET<br>screen-tv:NN<br>area-bar:NN<br>screen-a:DET<br>lab-computer:NN<br>lounge-the:DET<br>table-window:PREP_BY<br>monitor-the:DET<br>room-living:NN<br>desk-room:PREP_IN<br>screen-the:DET<br>in-room:POBJ                                               |
| 412   |   | sand,waves,blue<br>beach,summer,blue<br>waves,surf,wave<br>coral,beach,island<br>island,sand,islands          | beach-private:AMOD<br>beaches-sand:NN<br>pools-rock:NN<br>water-beautiful:AMOD<br>walking-beach:DOBJ<br>on-beach:POBJ<br>water-crystal:NN<br>sitting-sand:PREP_IN<br>beach-green:AMOD<br>beach-sandy:AMOD<br>overlooking-ocean:DOBJ<br>ocean-blue:AMOD<br>washing-clothes:DOBJ<br>beach-little:AMOD<br>waters-blue:AMOD |
| 413   |  | chair,room,office<br>carpet,room,chair<br>cafe,portrait,film<br>display,apple,mac<br>interior,furniture,house | theater-movie:NN<br>bedroom-house:PREP_IN<br>root-seats:ROOT<br>bed-room:PREP_IN<br>area-lounge:NN<br>tv-screen:NN<br>machine-the:DET<br>room-hotel:NN<br>table-bar:PREP_IN<br>room-a:DET<br>theater-a:DET<br>bar-an:DET<br>bedroom-house:PREP_OF<br>shelf-book:NN<br>bedroom-old:AMOD                                  |

Continued on next page

Table1 – continued from previous page

| Index | Image                                                                               | NUS-WIDE Concepts                                                                                                               | SBU Concepts                                                                                                                                                                                                                                                                                                    |
|-------|-------------------------------------------------------------------------------------|---------------------------------------------------------------------------------------------------------------------------------|-----------------------------------------------------------------------------------------------------------------------------------------------------------------------------------------------------------------------------------------------------------------------------------------------------------------|
| 414   |    | toronto,architecture,blue<br>tiger,leopard,water<br>blur,people,street<br>cats,wild,lion<br>cute,wildlife,squirrel              | cub-tiger:NN<br>stump-a:DET<br>sitting-grass:PREP_IN<br>stump-tree:NN<br>cat-garden:PREP_IN<br>tiger-a:DET<br>root-tiger:ROOT<br>garden-back:AMOD<br>cat-lives:RCMOD<br>cats-dogs:CONJ_AND<br>tigers-the:DET<br>cat-grass:PREP_IN<br>pot-flower:NN<br>watching-birds:DOBJ<br>birds-baby:NN                      |
| 415   |   | tree,branch,flower<br>branch,winter,yellow<br>blossoms,trees,tree<br>tree,trunk,leaves<br>leaves,fall,tree                      | tree-sky:CONJ_AND<br>bats-fruit:NN<br>sleeping-tree:PREP_IN<br>high-tree:PREP_IN<br>top-tree:NN<br>branches-sky:PREP_AGAINST<br>tree-blossom:NN<br>bird-tree:PREP_IN<br>tree-gum:NN<br>branches-the:DET<br>up-tree:PREP_IN<br>root-branches:ROOT<br>tree-looking:VMOD<br>root-bats:ROOT<br>hanging-tree:PREP_IN |
| 416   |  | design,interior,furniture<br>interior,furniture,house<br>chair,room,office<br>modern,interior,furniture<br>home,interior,design | desk-a:DET<br>desk-computer:NN<br>desk-new:AMOD<br>root-desk:ROOT<br>desk-room:PREP_IN<br>desk-office:PREP_IN<br>root-room:ROOT<br>table-kitchen:PREP_IN<br>office-home:NN<br>office-new:AMOD<br>desk-the:DET<br>desk-bedroom:PREP_IN<br>desk-office:NN<br>table-window:PREP_BY<br>room-kitchen:CONJ_AND        |

Continued on next page

Table1 – continued from previous page

| Index | Image                                                                               | NUS-WIDE Concepts                                                                                                                 | SBU Concepts                                                                                                                                                                                                                                                                                                         |
|-------|-------------------------------------------------------------------------------------|-----------------------------------------------------------------------------------------------------------------------------------|----------------------------------------------------------------------------------------------------------------------------------------------------------------------------------------------------------------------------------------------------------------------------------------------------------------------|
| 417   |    | hill,italy,italia<br>sheep,landscape,sky<br>forest,mountains,clouds<br>countryside,clouds,green<br>tundra,colorado,mountain       | root-hill:ROOT<br>top-mountain:NN<br>hill-green:AMOD<br>green-so:ADVMOD<br>hillside-the:DET<br>crater-the:DET<br>hills-green:AMOD<br>hill-a:DET<br>field-green:AMOD<br>mountain-highest:AMOD<br>side-mountain:NN<br>mountains-green:AMOD<br>horse-white:AMOD<br>field-cow:NN<br>side-hill:NN                         |
| 418   |   | picture,portrait,people<br>natural,trees,tree<br>gold,color,art<br>dance,culture,traditional<br>arizona,vintage,urban             | hand-one:NUM<br>boy-sitting:VMOD<br>standing-<br>wall:PREP_IN_FRONT_OF<br>me-house:PREP_IN<br>root-boy:ROOT<br>girl-every:DET<br>exchange-the:DET<br>boy-sitting:DEP<br>took-house:NSUBJ<br>boy-box:PREP_IN<br>cute-really:ADVMOD<br>boy-chair:PREP_IN<br>cute-too:ADVMOD<br>standing-girl:NN<br>idea-good:AMOD      |
| 419   |  | interior,furniture,house<br>studio,microphones,office<br>modern,interior,furniture<br>carpet,room,chair<br>chairs,interior,office | room-living:AMOD<br>table-house:PREP_IN<br>room-kitchen:CONJ_AND<br>table-chairs:CONJ_AND<br>carpet-the:DET<br>root-downstairs:ROOT<br>door-front:AMOD<br>standing-way:PREP_IN<br>room-living:NN<br>root-desk:ROOT<br>desk-new:AMOD<br>room-front:AMOD<br>standing-kitchen:PREP_IN<br>in-room:POBJ<br>root-room:ROOT |

Continued on next page



**Table1 – continued from previous page**

| Index                  | Image                                                                               | NUS-WIDE Concepts                                                                                                          | SBU Concepts                                                                                                                                                                                                                                                                                          |
|------------------------|-------------------------------------------------------------------------------------|----------------------------------------------------------------------------------------------------------------------------|-------------------------------------------------------------------------------------------------------------------------------------------------------------------------------------------------------------------------------------------------------------------------------------------------------|
| 420                    |    | interior,furniture,house<br>chairs,interior,office<br>restaurant,street,people<br>decoration,home,room<br>room,design,home | table-window:PREP_BY<br>room-house:PREP_OF<br>lounge-the:DET<br>table-house:PREP_IN<br>room-house:PREP_IN<br>room-family:NN<br>table-kitchen:PREP_IN<br>root-tables:ROOT<br>area-bar:NN<br>room-dining:NN<br>tables-the:DET<br>table-room:NN<br>root-lounge:ROOT<br>tv-screen:NN<br>fireplace-the:DET |
| 421                    |   | dog,white,explore<br>dogs,snow,beach<br>run,grass,pet<br>pets,cat,cats<br>run,dog,fun                                      | dog-white:AMOD<br>girl-dog:CONJ_AND<br>dog-black:AMOD<br>root-horse:ROOT<br>horse-black:AMOD<br>root-black:ROOT<br>running-water:PREP_IN<br>dogs-cats:CONJ_AND<br>cow-a:DET<br>ball-tennis:NN<br>sit-to:AUX<br>running-field:PREP_IN<br>horse-white:AMOD<br>dogs-two:NUM<br>enjoying-sun:DOBJ         |
| 422                    |  | birds,wings,white<br>running,dog,horse<br>dance,woman,jump<br>female,animal,pet<br>arctic,ice,bird                         | root-goose:ROOT<br>standing-water:PREP_IN<br>bird-the:DET<br>caught-bird:DOBJ<br>lake-frozen:AMOD<br>bird-sitting:VMOD<br>gull-a:DET<br>bird-black:AMOD<br>seagull-a:DET<br>birds-little:AMOD<br>sparrow-a:DET<br>feathers-the:DET<br>looking-food:PREP_FOR<br>birds-the:DET<br>bird-water:NN         |
| Continued on next page |                                                                                     |                                                                                                                            |                                                                                                                                                                                                                                                                                                       |

Table1 – continued from previous page

| Index                  | Image                                                                               | NUS-WIDE Concepts                                                                                                            | SBU Concepts                                                                                                                                                                                                                                                                                             |
|------------------------|-------------------------------------------------------------------------------------|------------------------------------------------------------------------------------------------------------------------------|----------------------------------------------------------------------------------------------------------------------------------------------------------------------------------------------------------------------------------------------------------------------------------------------------------|
| 423                    |    | cat,kitten,kitty<br>cute,cats,cat<br>waiting,portrait,cute<br>adorable,funny,nature<br>kitten,fun,jump                       | likes-sit:XCOMP<br>window-sunny:AMOD<br>moment-a:DET<br>cute-being:COP<br>cat-orange:AMOD<br>chair-computer:NN<br>shelter-animal:NN<br>chair-office:NN<br>cat-lives:RCMOD<br>flowers-house:PREP_IN<br>loves-sit:XCOMP<br>root-mean:ROOT<br>chair-desk:NN<br>root-daisy:ROOT<br>running-house:PREP_AROUND |
| 424                    |   | shop,market,food<br>december,christmas,green<br>copyright,fun,pretty<br>pictures,fun,friends<br>bar,glasses,people           | candles-the:DET<br>table-bar:PREP_IN<br>shirt-red:AMOD<br>boy-car:PREP_IN<br>girl-mirror:PREP_IN<br>bar-a:DET<br>boy-red:PREP_IN<br>candle-a:DET<br>vase-the:DET<br>year-new:NN<br>girl-bar:PREP_IN<br>market-air:NN<br>root-birthday:ROOT<br>window-shop:PREP_OF<br>root-daughter:ROOT                  |
| 425                    |  | wings,airplane,airplanes<br>fighter,navy,california<br>jet,airplanes,wing<br>furniture,chairs,retro<br>tanker,truck,airplane | museum-airplane:NN<br>flying-order:DOBJ<br>museum-vintage:AMOD<br>may-heritage:NN<br>may-collection:NN<br>machine-flying:AMOD<br>plane-the:DET<br>box-black:AMOD<br>plane-a:DET<br>airplane-a:DET<br>root-cow:ROOT<br>root-bow:ROOT<br>chair-lounge:NN<br>west-key:NN<br>walk-as:MARK                    |
| Continued on next page |                                                                                     |                                                                                                                              |                                                                                                                                                                                                                                                                                                          |

**Table1 – continued from previous page**

| Index | Image                                                                               | NUS-WIDE Concepts                                                                                                                  | SBU Concepts                                                                                                                                                                                                                                                                                                           |
|-------|-------------------------------------------------------------------------------------|------------------------------------------------------------------------------------------------------------------------------------|------------------------------------------------------------------------------------------------------------------------------------------------------------------------------------------------------------------------------------------------------------------------------------------------------------------------|
| 426   |    | bike,motorcycle,race<br>motorcycle,motion,asia<br>motorcycle,road,sky<br>motorcycle,netherlands,nederland<br>formula,classic,sport | motorcycle-a:DET<br>bike-front:PREP_IN<br>bike-road:NN<br>bicycle-a:DET<br>root-show:ROOT<br>show-car:NN<br>basket-bike:NN<br>dog-basket:PREP_IN<br>show-a:DET<br>race-a:DET<br>lot-parking:NN<br>ride-bike:DOBJ<br>race-the:DET<br>bike-mountain:NN<br>race-bike:NN                                                   |
| 427   |   | interior,furniture,house<br>modern,interior,furniture<br>design,interior,furniture<br>chair,room,office<br>furniture,chairs,retro  | desk-a:DET<br>root-room:ROOT<br>room-living:AMOD<br>living-room:DOBJ<br>table-chairs:CONJ_AND<br>walls-green:AMOD<br>room-kitchen:CONJ_AND<br>room-green:AMOD<br>bedroom-house:PREP_OF<br>looking-room:PREP_INTO<br>corner-the:DET<br>house-bedroom:AMOD<br>room-house:PREP_IN<br>desk-computer:NN<br>dining-room:DOBJ |
| 428   |  | airport,runway,sky<br>runway,flight,aviation<br>cruise,port,europe<br>landing,aviation,flying<br>international,aircraft,airplane   | bridge-big:AMOD<br>airport-the:DET<br>road-new:AMOD<br>bridge-bridge:CONJ_AND<br>bridge-highway:PREP_OVER<br>airplane-a:DET<br>bridge-goes:RCMOD<br>beach-long:AMOD<br>highway-a:DET<br>seine-river:NN<br>track-the:DET<br>goes-bridge:NSUBJ<br>park-car:NN<br>bridge-longest:AMOD<br>goes-train:NSUBJ                 |

Continued on next page

**Table1 – continued from previous page**

| Index                  | Image                                                                               | NUS-WIDE Concepts                                                                                                                              | SBU Concepts                                                                                                                                                                                                                                                                                                          |
|------------------------|-------------------------------------------------------------------------------------|------------------------------------------------------------------------------------------------------------------------------------------------|-----------------------------------------------------------------------------------------------------------------------------------------------------------------------------------------------------------------------------------------------------------------------------------------------------------------------|
| 429                    |    | door, windows, house<br>windows, house, green<br>cottage, vintage, pink<br>decoration, home, room<br>bathroom, abandoned, interior             | root-box:ROOT<br>door-side:NN<br>door-front:AMOD<br>door-office:NN<br>room-house:PREP_OF<br>house-every:DET<br>root-toilet:ROOT<br>door-windows:CONJ_AND<br>box-an:DET<br>house-bedroom:AMOD<br>box-phone:NN<br>back-door:DEP<br>box-red:AMOD<br>looking-door:DOBJ<br>root-complete:ROOT                              |
| 430                    |   | carpet, room, chair<br>polaroid, abandoned, california<br>modern, interior, furniture<br>floor, window, interior<br>interior, furniture, house | root-bedroom:ROOT<br>bedroom-house:PREP_IN<br>root-downstairs:ROOT<br>room-family:NN<br>bed-bedroom:PREP_IN<br>standing-door:PREP_IN<br>room-the:DET<br>root-suite:ROOT<br>root-room:ROOT<br>house-bedroom:AMOD<br>root-guest:ROOT<br>living-room:DOBJ<br>basement-the:DET<br>room-kitchen:CONJ_AND<br>room-living:NN |
| 431                    |  | bench, winter, snow<br>hut, green, tree<br>fence, grass, field<br>chair, abandoned, old<br>range, rifles, iraq                                 | bench-a:DET<br>farm-the:DET<br>root-bench:ROOT<br>heat-the:DET<br>bench-the:DET<br>seat-a:DET<br>water-a:DET<br>garden-water:NN<br>root-grown:ROOT<br>week-last:AMOD<br>house-boat:NN<br>root-seat:ROOT<br>root-metal:ROOT<br>stump-the:DET<br>green-very:ADVMOD                                                      |
| Continued on next page |                                                                                     |                                                                                                                                                |                                                                                                                                                                                                                                                                                                                       |



Table1 – continued from previous page

| Index | Image                                                                               | NUS-WIDE Concepts                                                                                                                  | SBU Concepts                                                                                                                                                                                                                                                                                   |
|-------|-------------------------------------------------------------------------------------|------------------------------------------------------------------------------------------------------------------------------------|------------------------------------------------------------------------------------------------------------------------------------------------------------------------------------------------------------------------------------------------------------------------------------------------|
| 432   |    | automobile,transportation,vintage<br>fisheye,portrait,closeup<br>silver,car,street<br>car,automobile,truck<br>racing,driver,united | root-show:ROOT<br>car-classic:AMOD<br>me-car:PREP_IN<br>lot-parking:NN<br>show-car:NN<br>portrait-self:NN<br>parked-street:PREP_ON<br>show-a:DET<br>show-car:NSUBJ<br>truck-ford:NN<br>has-car:NSUBJ<br>car-a:DET<br>cars-old:AMOD<br>seat-driver:POSS<br>parked-street:PREP_IN                |
| 433   |   | army,iraq,kuwait<br>vietnam,soldier,adults<br>males,soldier,war<br>airforce,vietnam,navy<br>soldiers,weapons,uniform               | race-the:DET<br>bike-mountain:NN<br>race-bike:NN<br>race-mountain:NN<br>tree-joshua:NN<br>ride-the:DET<br>black-orange:CONJ_AND<br>biking-mountain:NN<br>race-a:DET<br>motorcycle-a:DET<br>park-mountain:NN<br>race-cup:NN<br>orange-black:CONJ_AND<br>angle-a:DET<br>flash-a:DET              |
| 434   |  | auto,truck,canada<br>bus,abandoned,clouds<br>store,night,architecture<br>automobile,truck,california<br>engine,truck,auto          | truck-front:PREP_IN<br>van-white:AMOD<br>parked-street:PREP_IN<br>root-van:ROOT<br>car-front:PREP_IN<br>root-county:ROOT<br>has-car:NSUBJ<br>car-green:AMOD<br>bus-tour:NN<br>street-city:PREP_IN<br>bus-city:NN<br>dealership-car:NN<br>root-coach:ROOT<br>dog-truck:PREP_IN<br>park-car:DOBJ |

Continued on next page

**Table1 – continued from previous page**

| Index | Image                                                                               | NUS-WIDE Concepts                                                                                                    | SBU Concepts                                                                                                                                                                                                                                                                                     |
|-------|-------------------------------------------------------------------------------------|----------------------------------------------------------------------------------------------------------------------|--------------------------------------------------------------------------------------------------------------------------------------------------------------------------------------------------------------------------------------------------------------------------------------------------|
| 435   |    | auto,automobile,race<br>automobile,ontario,speed<br>vehicle,cars,speed<br>speed,racing,car<br>sport,race,car         | spotted-car:NSUBJ<br>car-toy:NN<br>car-new:AMOD<br>car-classic:AMOD<br>car-street:PREP_IN<br>parked-car:NSUBJ<br>parked-street:PREP_IN<br>parked-street:PREP_ON<br>show-car:NN<br>car-blue:AMOD<br>car-green:AMOD<br>one-cars:PREP_OF<br>show-car:NSUBJ<br>warehouse-brick:NN<br>car-rental:AMOD |
| 436   |   | flying,california,pilot<br>airplane,pilot,fighter<br>wings,bird,sky<br>jet,airplane,flight<br>aircraft,pilot,fighter | seat-front:AMOD<br>view-seat:PREP_FROM<br>plane-the:DET<br>car-the:DET<br>home-the:DET<br>window-truck:NN<br>mirror-rearview:NN<br>back-car:PREP_OF<br>home-car:NN<br>trip-road:NN<br>mirror-side:NN<br>seat-back:AMOD<br>home-way:NN<br>in-car:POBJ<br>back-home:DEP                            |
| 437   |  | bus,abandoned,clouds<br>auto,truck,canada<br>police,car,cars<br>driver,cars,auto<br>truck,tanker,massachusetts       | root-coach:ROOT<br>station-bus:NN<br>train-little:AMOD<br>coach-a:DET<br>train-road:NN<br>car-front:PREP_IN<br>root-van:ROOT<br>parked-street:PREP_IN<br>car-street:NN<br>house-car:CONJ_AND<br>live-people:NSUBJ<br>van-white:AMOD<br>house-front:PREP_IN<br>buses-the:DET<br>window-rear:AMOD  |

Continued on next page

Table1 – continued from previous page

| Index                  | Image                                                                               | NUS-WIDE Concepts                                                                                                 | SBU Concepts                                                                                                                                                                                                                                                                                                         |
|------------------------|-------------------------------------------------------------------------------------|-------------------------------------------------------------------------------------------------------------------|----------------------------------------------------------------------------------------------------------------------------------------------------------------------------------------------------------------------------------------------------------------------------------------------------------------------|
| 438                    |    | polaroid,marsh,landscape<br>aerial,blue,sea<br>fun,sky,vacation<br>aerial,city,germany<br>window,frost,water      | car-cable:NN<br>view-clear:AMOD<br>root-school:ROOT<br>root-travel:ROOT<br>castle-hill:PREP_ON<br>clear-water:DOBJ<br>clear-crystal:ADVMOD<br>wall-great:AMOD<br>view-car:PREP_FROM<br>side-mountain:PREP_OF<br>root-crystal:ROOT<br>lift-the:DET<br>castle-dover:NN<br>fish-river:PREP_IN<br>center-picture:PREP_OF |
| 439                    |   | fall,park,water<br>home,portrait,blue<br>individual,person,people<br>judge,cat,little<br>cool,portrait,cute       | shirt-a:DET<br>me-shirt:PREP_IN<br>in-shirt:POBJ<br>shirt-white:AMOD<br>me-house:PREP_IN<br>shirt-new:AMOD<br>shirt-pink:AMOD<br>car-way:PREP_ON<br>shirt-dress:NN<br>shirt-blue:AMOD<br>riding-cars:PREP_IN<br>boy-shirt:PREP_IN<br>in-car:POBJ<br>smile-a:DET<br>picture-me:PREP_OF                                |
| 440                    |  | halloween,dog,costume<br>picture,portrait,people<br>oregon,food,work<br>buddha,monks,statue<br>girls,child,beauty | root-pig:ROOT<br>apple-a:DET<br>baby-a:DET<br>ball-little:AMOD<br>shots-few:AMOD<br>boy-baby:NN<br>root-ginger:ROOT<br>rose-black:PREP_IN<br>thought-cute:CCOMP<br>shots-a:DET<br>root-grace:ROOT<br>girl-white:AMOD<br>orange-an:DET<br>bag-paper:NN<br>home-a:DET                                                  |
| Continued on next page |                                                                                     |                                                                                                                   |                                                                                                                                                                                                                                                                                                                      |

**Table1 – continued from previous page**

| Index                  | Image                                                                               | NUS-WIDE Concepts                                                                                                               | SBU Concepts                                                                                                                                                                                                                                                                                                       |
|------------------------|-------------------------------------------------------------------------------------|---------------------------------------------------------------------------------------------------------------------------------|--------------------------------------------------------------------------------------------------------------------------------------------------------------------------------------------------------------------------------------------------------------------------------------------------------------------|
| 441                    |    | room,design,home<br>design,interior,furniture<br>home,interior,design<br>retro,modern,furniture<br>interior,furniture,house     | root-room:ROOT<br>room-house:PREP_IN<br>bedroom-main:AMOD<br>room-house:PREP_OF<br>shopping-window:NN<br>leads-door:NSUBJ<br>fireplace-the:DET<br>table-kitchen:PREP_IN<br>house-guest:NN<br>area-kitchen:NN<br>kitchen-sink:DEP<br>root-guest:ROOT<br>room-great:AMOD<br>color-wall:NN<br>bedroom-house:PREP_OF   |
| 442                    |   | elephants,sunset,travel<br>horse,argentina,field<br>horses,landscape,clouds<br>cows,clouds,grass<br>horse,sky,landscape         | root-cow:ROOT<br>root-horses:ROOT<br>cows-road:PREP_IN<br>horses-white:AMOD<br>crossing-road:DOBJ<br>horses-the:DET<br>farmer-a:DET<br>root-horse:ROOT<br>horse-a:DET<br>horse-black:AMOD<br>cow-the:DET<br>root-elephant:ROOT<br>cow-a:DET<br>horse-the:DET<br>horse-drawn:VMOD                                   |
| 443                    |  | home,interior,design<br>studio,microphones,office<br>chair,room,office<br>interior,furniture,house<br>modern,interior,furniture | root-downstairs:ROOT<br>bedroom-house:PREP_OF<br>bedroom-house:PREP_IN<br>root-room:ROOT<br>standing-door:PREP_IN<br>bedroom-spare:AMOD<br>room-house:PREP_IN<br>room-new:AMOD<br>room-guest:NN<br>bedroom-a:DET<br>has-bedroom:NSUBJ<br>bedroom-the:DET<br>leads-door:NSUBJ<br>room-living:AMOD<br>room-living:NN |
| Continued on next page |                                                                                     |                                                                                                                                 |                                                                                                                                                                                                                                                                                                                    |



Table1 – continued from previous page

| Index                  | Image                                                                               | NUS-WIDE Concepts                                                                                                       | SBU Concepts                                                                                                                                                                                                                                                                                                                    |
|------------------------|-------------------------------------------------------------------------------------|-------------------------------------------------------------------------------------------------------------------------|---------------------------------------------------------------------------------------------------------------------------------------------------------------------------------------------------------------------------------------------------------------------------------------------------------------------------------|
| 444                    |    | room,design,home<br>work,office,apple<br>decoration,home,room<br>furniture,toys,house<br>design,interior,furniture      | table-window:PREP_BY<br>table-kitchen:PREP_IN<br>room-house:PREP_OF<br>display-the:DET<br>sign-table:PREP_IN<br>book-new:AMOD<br>table-house:PREP_IN<br>table-bar:PREP_IN<br>house-gingerbread:AMOD<br>table-room:NN<br>lounge-the:DET<br>shopping-window:NN<br>reflected-mirror:PREP_IN<br>desk-room:PREP_IN<br>area-lounge:NN |
| 445                    |   | horses,explore,animal<br>goat,mountain,wildlife<br>dog,white,explore<br>goat,cheese,cat<br>running,dog,horse            | dog-white:AMOD<br>goat-a:DET<br>horses-white:AMOD<br>cow-a:DET<br>pony-a:DET<br>dogs-two:NUM<br>taken-family:AGENT<br>dogs-cats:CONJ_AND<br>dog-brown:AMOD<br>root-cow:ROOT<br>riding-horse:DOBJ<br>forest-new:NN<br>horse-a:DET<br>root-goat:ROOT<br>cow-field:PREP_IN                                                         |
| 446                    |  | hangar,aviation,aircraft<br>airport,travel,architecture<br>airforce,museum,flag<br>colour,people,art<br>police,car,cars | garage-parking:NN<br>subway-the:DET<br>seats-the:DET<br>truck-big:AMOD<br>station-train:NN<br>station-central:AMOD<br>exit-the:DET<br>root-trucks:ROOT<br>car-police:NN<br>line-red:AMOD<br>trucks-the:DET<br>sticker-a:DET<br>train-station:DOBJ<br>airport-the:DET<br>lot-parking:NN                                          |
| Continued on next page |                                                                                     |                                                                                                                         |                                                                                                                                                                                                                                                                                                                                 |

Table1 – continued from previous page

| Index                  | Image                                                                               | NUS-WIDE Concepts                                                                                                             | SBU Concepts                                                                                                                                                                                                                                                                                                |
|------------------------|-------------------------------------------------------------------------------------|-------------------------------------------------------------------------------------------------------------------------------|-------------------------------------------------------------------------------------------------------------------------------------------------------------------------------------------------------------------------------------------------------------------------------------------------------------|
| 447                    |    | hawaii,flower,copyright<br>horse,red,white<br>festival,india,travel<br>band,metal,red<br>bicycle,china,color                  | market-the:DET<br>market-local:AMOD<br>market-a:DET<br>root-market:ROOT<br>mai-chiang:NN<br>horse-a:DET<br>horse-black:AMOD<br>market-street:NN<br>area-market:NN<br>market-there:ADV<br>horse-the:DET<br>woman-a:DET<br>peru-river:APPOS<br>horse-wooden:AMOD<br>horse-drawn:VMOD                          |
| 448                    |   | railroad,locomotive,steam<br>locomotive,bridge,track<br>houseboat,house,holland<br>train,engine,steam<br>railway,bridge,steam | cars-train:NN<br>train-a:DET<br>car-train:NN<br>train-freight:NN<br>car-railroad:NN<br>crosses-train:NSUBJ<br>car-box:NN<br>house-yellow:AMOD<br>root-train:ROOT<br>railroad-the:DET<br>tracks-railroad:NN<br>train-an:DET<br>train-road:NN<br>yard-train:NN<br>train-passenger:NN                          |
| 449                    |  | garden,trees,tree<br>valley,water,river<br>hill,architecture,city<br>scenic,outdoors,tree<br>ancient,tree,city                | forest-national:AMOD<br>root-suspension:ROOT<br>trails-the:DET<br>side-river:PREP_OF<br>bike-mountain:NN<br>bridge-suspension:NN<br>valley-the:DET<br>canyon-river:NN<br>root-trail:ROOT<br>bridge-canyon:PREP_OVER<br>bridge-little:AMOD<br>loop-the:DET<br>trail-a:DET<br>trail-bike:NN<br>wheel-water:NN |
| Continued on next page |                                                                                     |                                                                                                                               |                                                                                                                                                                                                                                                                                                             |

Table1 – continued from previous page

| Index                  | Image                                                                               | NUS-WIDE Concepts                                                                                                | SBU Concepts                                                                                                                                                                                                                                                                                               |
|------------------------|-------------------------------------------------------------------------------------|------------------------------------------------------------------------------------------------------------------|------------------------------------------------------------------------------------------------------------------------------------------------------------------------------------------------------------------------------------------------------------------------------------------------------------|
| 450                    |    | design,light,red<br>home,portrait,blue<br>square,portrait,china<br>fall,park,water<br>cheering,fun,national      | seat-back:AMOD<br>girls-all:PREDET<br>girls-the:DET<br>seat-car:PREP_OF<br>girls-standing:DEP<br>standing-line:PREP_IN<br>van-the:DET<br>line-bathroom:PREP_FOR<br>girl-car:PREP_IN<br>root-girls:ROOT<br>me-shirt:PREP_IN<br>home-the:DET<br>home-way:NN<br>riding-cars:PREP_IN<br>in-car:POBJ            |
| 451                    |   | adorable,rabbit,bunny<br>pet,dog,rabbit<br>bunny,white,pups<br>rabbit,sweet,pets<br>rabbit,white,adorable        | cat-white:AMOD<br>dog-white:AMOD<br>dog-window:PREP_IN<br>family-foster:AMOD<br>root-puppy:ROOT<br>dog-box:PREP_IN<br>dog-service:NN<br>taken-family:AGENT<br>puppy-the:DET<br>bear-polar:AMOD<br>dog-house:PREP_IN<br>retriever-golden:AMOD<br>root-doggy:ROOT<br>cute-dog:DOBJ<br>old-months:NPADVMOD    |
| 452                    |  | mist,mountains,clouds<br>grass,landscape,clouds<br>fog,mountains,sky<br>green,sky,clouds<br>cow,landscape,clouds | field-cow:NN<br>horse-white:AMOD<br>top-mountain:PREP_OF<br>mountain-a:DET<br>hill-a:DET<br>root-hill:ROOT<br>hill-green:AMOD<br>hill-house:PREP_NEAR<br>mountain-distance:PREP_IN<br>trip-road:NN<br>root-dunes:ROOT<br>standing-field:PREP_IN<br>road-mountain:NN<br>parkway-the:DET<br>mountain-the:DET |
| Continued on next page |                                                                                     |                                                                                                                  |                                                                                                                                                                                                                                                                                                            |

**Table1 – continued from previous page**

| Index | Image                                                                               | NUS-WIDE Concepts                                                                                                            | SBU Concepts                                                                                                                                                                                                                                                                                                                                  |
|-------|-------------------------------------------------------------------------------------|------------------------------------------------------------------------------------------------------------------------------|-----------------------------------------------------------------------------------------------------------------------------------------------------------------------------------------------------------------------------------------------------------------------------------------------------------------------------------------------|
| 453   |    | adorable,rabbit,bunny<br>cats,kitten,pets<br>kitty,white,cats<br>basket,cat,kitten<br>feline,kitten,animals                  | cat-bag:PREP_IN<br>cat-house:PREP_IN<br>cute-being:COP<br>cats-the:DET<br>root-kittens:ROOT<br>dog-bag:PREP_IN<br>house-cat:NN<br>cat-pot:PREP_IN<br>position-a:DET<br>cat-basket:PREP_IN<br>puppy-a:DET<br>bowl-dog:NN<br>puppy-cute:AMOD<br>cat-cute:AMOD<br>chair-bag:NN                                                                   |
| 454   |   | small,big,man<br>health,red,white<br>nevada,hotel,adult<br>cheering,fun,national<br>delete,people,woman                      | girls-all:PREDET<br>girls-standing:DEP<br>line-bathroom:PREP_FOR<br>standing-line:PREP_IN<br>dressed-black:PREP_IN<br>shirt-red:AMOD<br>me-dress:PREP_IN<br>dress-red:AMOD<br>head-nags:NN<br>floor-shangri:PREP_OF<br>girl-red:PREP_IN<br>girl-bar:PREP_IN<br>riding-cars:PREP_IN<br>devil-dress:PREP_IN<br>in-office:POBJ                   |
| 455   |  | kitchen,interior,design<br>room,design,home<br>design,interior,furniture<br>interior,furniture,house<br>decoration,home,room | room-house:PREP_IN<br>table-kitchen:PREP_IN<br>room-house:PREP_OF<br>flowers-fresh:AMOD<br>sign-table:PREP_IN<br>room-guest:NN<br>table-window:PREP_BY<br>decorated-flowers:PREP_WITH<br>around-house:POBJ<br>house-bedroom:AMOD<br>color-wall:NN<br>living-room:DOBJ<br>root-complete:ROOT<br>bedroom-house:PREP_OF<br>kitchen-house:PREP_IN |

Continued on next page



Table1 – continued from previous page

| Index | Image                                                                               | NUS-WIDE Concepts                                                                                                               | SBU Concepts                                                                                                                                                                                                                                                                             |
|-------|-------------------------------------------------------------------------------------|---------------------------------------------------------------------------------------------------------------------------------|------------------------------------------------------------------------------------------------------------------------------------------------------------------------------------------------------------------------------------------------------------------------------------------|
| 456   |    | sidewalk,people,woman<br>photographers,portrait,photos<br>shooting,studio,playing<br>pennsylvania,animal,zoo<br>raft,pool,green | dog-window:PREP_IN<br>dogs-cats:CONJ_AND<br>window-shop:NN<br>dogs-two:NUM<br>pool-swimming:NN<br>root-dogs:ROOT<br>man-old:AMOD<br>shrine-the:DET<br>cafe-a:DET<br>guy-a:DET<br>woman-sitting:VMOD<br>one-black:AMOD<br>puppy-the:DET<br>show-tv:NN<br>creature-the:DET                 |
| 457   |   | pet,dog,rabbit<br>kitty,orange,cats<br>feline,kitten,animals<br>dogs,white,cute<br>standing,animal,cat                          | dog-house:PREP_IN<br>fence-the:DET<br>shelter-animal:NN<br>dogs-cats:CONJ_AND<br>cat-street:NN<br>dogs-two:NUM<br>root-dogs:ROOT<br>cute-a:DET<br>one-dogs:PREP_OF<br>cats-the:DET<br>cute-dog:DOBJ<br>dog-street:NN<br>dog-water:PREP_IN<br>watching-birds:DOBJ<br>dog-cute:AMOD        |
| 458   |  | mac,black,music<br>display,apple,mac<br>host,graffiti,hotel<br>commercials,japanese,japan<br>family,love,red                    | screen-the:DET<br>screen-computer:NN<br>screen-big:AMOD<br>root-screen:ROOT<br>sign-the:DET<br>computer-the:DET<br>screen-video:AMOD<br>monitor-the:DET<br>screen-tv:NN<br>front-of:PREP<br>windows-room:PREP_IN<br>computer-a:DET<br>book-new:AMOD<br>screen-blue:AMOD<br>board-the:DET |

Continued on next page

Table1 – continued from previous page

| Index                  | Image                                                                               | NUS-WIDE Concepts                                                                                                            | SBU Concepts                                                                                                                                                                                                                                                                                                                                                |
|------------------------|-------------------------------------------------------------------------------------|------------------------------------------------------------------------------------------------------------------------------|-------------------------------------------------------------------------------------------------------------------------------------------------------------------------------------------------------------------------------------------------------------------------------------------------------------------------------------------------------------|
| 459                    |    | <p>racing,driver,united<br/>formula,classic,sport<br/>race,car,auto<br/>sports,car,race<br/>sport,race,car</p>               | <p>root-show:ROOT<br/>plate-license:NN<br/>show-car:NSUBJ<br/>root-car:ROOT<br/>spotted-car:NSUBJ<br/>show-the:DET<br/>building-d70:PREP_IN<br/>show-building:PREP_AT<br/>scheme-white:AMOD<br/>red-white:CONJ_AND<br/>show-car:NN<br/>car-classic:AMOD<br/>window-rear:AMOD<br/>car-police:NN<br/>parked-street:PREP_ON</p>                                |
| 460                    |   | <p>boston,buildings,boats<br/>cruise,port,europe<br/>windows,people,clouds<br/>london,sky,river<br/>big,sky,water</p>        | <p>bridge-harbour:NN<br/>crosses-river:DOBJ<br/>crosses-bridge:NSUBJ<br/>house-opera:NN<br/>spans-bridge:NSUBJ<br/>bridge-the:DET<br/>bridge-beautiful:AMOD<br/>bridge-famous:AMOD<br/>arches-the:DET<br/>view-bridge:PREP_OF<br/>eye-london:NN<br/>passes-bridge:PREP_UNDER<br/>bridge-manhattan:NN<br/>bridge-background:PREP_IN<br/>bridge-avenue:NN</p> |
| 461                    |  | <p>health,sky,clouds<br/>environment,health,california<br/>jet,clouds,military<br/>craft,plane,sky<br/>look,clouds,plane</p> | <p>tower-cell:NN<br/>sign-sky:PREP_IN<br/>sky-summer:NN<br/>pole-telephone:NN<br/>plane-sky:PREP_IN<br/>tower-phone:NN<br/>lines-power:NN<br/>pole-power:NN<br/>wires-the:DET<br/>plane-flying:DEP<br/>airplane-sky:PREP_IN<br/>root-plane:ROOT<br/>poles-telephone:NN<br/>fly-birds:NSUBJ<br/>looks-sky:NSUBJ</p>                                          |
| Continued on next page |                                                                                     |                                                                                                                              |                                                                                                                                                                                                                                                                                                                                                             |

**Table1 – continued from previous page**

| Index                  | Image                                                                               | NUS-WIDE Concepts                                                                                                            | SBU Concepts                                                                                                                                                                                                                                                                                             |
|------------------------|-------------------------------------------------------------------------------------|------------------------------------------------------------------------------------------------------------------------------|----------------------------------------------------------------------------------------------------------------------------------------------------------------------------------------------------------------------------------------------------------------------------------------------------------|
| 462                    |    | office,apple,mac<br>mac,office,photography<br>home,interior,design<br>room,design,home<br>kitchen,interior,design            | root-desk:ROOT<br>office-home:NN<br>desk-room:PREP_IN<br>desk-computer:NN<br>desk-a:DET<br>desk-the:DET<br>desk-office:PREP_IN<br>room-computer:NN<br>desk-bedroom:PREP_IN<br>kitchen-house:PREP_IN<br>table-chairs:CONJ_AND<br>desk-new:AMOD<br>desk-office:NN<br>computer-the:DET<br>office-the:DET    |
| 463                    |   | trip,summer,people<br>protesters,london,politics<br>adventure,photography,valleys<br>faces,portrait,woman<br>brown,wood,girl | lot-parking:NN<br>standing-street:PREP_IN<br>root-visit:ROOT<br>sitting-<br>house:PREP_IN_FRONT_OF<br>man-hat:PREP_IN<br>man-old:AMOD<br>bed-truck:NN<br>ride-a:DET<br>ride-train:NN<br>root-met:ROOT<br>bed-truck:PREP_OF<br>riding-cars:PREP_IN<br>root-ben:ROOT<br>root-man:ROOT<br>seat-front:AMOD   |
| 464                    |  | suits,girls,beach<br>shooting,model,portrait<br>jeep,girl,army<br>cheerleader,sports,girls<br>woman,dress,model              | ride-a:DET<br>girl-sexy:AMOD<br>root-laura:ROOT<br>girl-shirt:PREP_IN<br>girl-teenage:AMOD<br>girl-bikini:PREP_IN<br>on-bridge:POBJ<br>woman-young:NSUBJ<br>umbrella-white:AMOD<br>root-sister:ROOT<br>root-friend:ROOT<br>hair-the:DET<br>girl-looking:VMOD<br>flower-hair:PREP_IN<br>one-girls:PREP_OF |
| Continued on next page |                                                                                     |                                                                                                                              |                                                                                                                                                                                                                                                                                                          |

Table1 – continued from previous page

| Index                  | Image                                                                               | NUS-WIDE Concepts                                                                                                                        | SBU Concepts                                                                                                                                                                                                                                                                                          |
|------------------------|-------------------------------------------------------------------------------------|------------------------------------------------------------------------------------------------------------------------------------------|-------------------------------------------------------------------------------------------------------------------------------------------------------------------------------------------------------------------------------------------------------------------------------------------------------|
| 465                    |    | formula,classic,sport<br>motorcycle,road,sky<br>motorcycle,netherlands,nederland<br>riot,protesters,photojournalism<br>engine,art,nature | show-car:NSUBJ<br>motorcycle-a:DET<br>root-show:ROOT<br>car-classic:AMOD<br>owner-the:DET<br>red-black:CONJ_AND<br>building-britannic:AMOD<br>show-building:PREP_AT<br>building-d70:PREP_IN<br>truck-fire:NN<br>truck-red:AMOD<br>show-car:NN<br>fair-street:NN<br>market-central:AMOD<br>cap-the:DET |
| 466                    |   | woods,landscape,sky<br>fall,landscape,sky<br>jeep,sky,blue<br>barn,trees,field<br>house,landscape,trees                                  | pond-the:DET<br>slide-a:DET<br>root-land:ROOT<br>bridge-creek:PREP_OVER<br>forest-the:DET<br>lake-houses:DEP<br>tree-willow:NN<br>root-truck:ROOT<br>river-little:AMOD<br>house-forest:PREP_IN<br>mill-the:DET<br>river-white:AMOD<br>shot-window:PREP_THROUGH<br>car-an:DET<br>middle-forest:PREP_OF |
| 467                    |  | bike,motorcycle,race<br>bicycle,motion,girl<br>bicycle,track,art<br>racing,horse,sport<br>driver,white,horse                             | bicycle-a:DET<br>basket-bike:NN<br>bike-road:NN<br>dog-basket:PREP_IN<br>bike-mountain:NN<br>bike-front:PREP_IN<br>motorcycle-a:DET<br>ride-bike:NSUBJ<br>ride-to:AUX<br>root-ride:ROOT<br>race-a:DET<br>street-busy:AMOD<br>girls-little:AMOD<br>ride-bike:DOBJ<br>race-bike:NN                      |
| Continued on next page |                                                                                     |                                                                                                                                          |                                                                                                                                                                                                                                                                                                       |



Table1 – continued from previous page

| Index | Image                                                                               | NUS-WIDE Concepts                                                                                                   | SBU Concepts                                                                                                                                                                                                                                                                                           |
|-------|-------------------------------------------------------------------------------------|---------------------------------------------------------------------------------------------------------------------|--------------------------------------------------------------------------------------------------------------------------------------------------------------------------------------------------------------------------------------------------------------------------------------------------------|
| 468   |    | horse,argentina,field<br>horses,explore,animal<br>uniform,world,historic<br>war,soldiers,protest<br>horse,red,white | horses-the:DET<br>horse-the:DET<br>horse-a:DET<br>root-horse:ROOT<br>root-horses:ROOT<br>race-the:DET<br>horses-field:PREP_IN<br>horse-black:AMOD<br>barn-the:DET<br>riding-horse:DOBJ<br>game-ball:NN<br>game-a:DET<br>cow-a:DET<br>security-the:DET<br>class-the:DET                                 |
| 469   |   | auto,automobile,race<br>racing,cars,classic<br>cars,racing,classic<br>sport,race,car<br>speed,racing,car            | car-toy:NN<br>spotted-car:NSUBJ<br>car-classic:AMOD<br>parked-car:NSUBJ<br>truck-ford:NN<br>show-car:NN<br>car-new:AMOD<br>one-cars:PREP_OF<br>car-field:PREP_IN<br>warehouse-brick:NN<br>parked-street:PREP_IN<br>parked-street:PREP_ON<br>car-red:AMOD<br>car-sitting:VMOD<br>car-background:PREP_IN |
| 470   |  | squirrel,california,funny<br>cute,dog,puppy<br>funny,cute,nature<br>rodent,nature,squirrel<br>fun,dog,animal        | sitting-fence:PREP_ON<br>monkey-a:DET<br>cage-a:DET<br>cage-the:DET<br>house-bird:NN<br>bird-window:PREP_IN<br>window-kitchen:NN<br>feeders-bird:NN<br>feeder-bird:NN<br>backyard-the:DET<br>monkey-little:AMOD<br>root-pigeon:ROOT<br>monkey-the:DET<br>table-bird:NN<br>box-bird:NN                  |

Continued on next page

Table1 – continued from previous page

| Index                  | Image                                                                               | NUS-WIDE Concepts                                                                                                           | SBU Concepts                                                                                                                                                                                                                                                                                   |
|------------------------|-------------------------------------------------------------------------------------|-----------------------------------------------------------------------------------------------------------------------------|------------------------------------------------------------------------------------------------------------------------------------------------------------------------------------------------------------------------------------------------------------------------------------------------|
| 471                    |    | car,automobile,truck<br>driver,cars,auto<br>vehicle,cars,speed<br>auto,automobile,race<br>automobile,transportation,vintage | spotted-car:NSUBJ<br>cars-two:NUM<br>parked-car:NSUBJ<br>car-police:NN<br>car-street:PREP_IN<br>car-classic:AMOD<br>car-white:AMOD<br>cars-many:AMOD<br>show-car:NSUBJ<br>parked-street:PREP_IN<br>seat-driver:POSS<br>show-car:NN<br>car-little:AMOD<br>parked-street:PREP_ON<br>while-car:NN |
| 472                    |   | flying,california,pilot<br>racing,horse,sport<br>aviation,fighter,california<br>tennis,green,lines<br>nsw,coast,signs       | plate-home:NN<br>seats-the:DET<br>seats-house:PREP_IN<br>pool-the:DET<br>seats-box:NN<br>bridge-walking:AMOD<br>water-green:AMOD<br>sail-to:AUX<br>wall-field:NN<br>deck-the:DET<br>field-center:NN<br>best-seats:DEP<br>boats-wooden:AMOD<br>walking-bridge:PREP_OVER<br>sail-the:DET         |
| 473                    |  | cute,dog,puppy<br>cat,kitten,kitty<br>groom,sunset,woman<br>pet,dog,rabbit<br>pups,baby,pet                                 | cat-cute:AMOD<br>root-watches:ROOT<br>window-shop:NN<br>puppy-a:DET<br>dogs-two:NUM<br>cow-a:DET<br>figure-out:PRT<br>cat-street:NN<br>shelter-animal:NN<br>dog-street:NN<br>cats-the:DET<br>cat-house:PREP_IN<br>root-brother:ROOT<br>root-fat:ROOT<br>root-buddy:ROOT                        |
| Continued on next page |                                                                                     |                                                                                                                             |                                                                                                                                                                                                                                                                                                |

Table1 – continued from previous page

| Index | Image                                                                               | NUS-WIDE Concepts                                                                                                 | SBU Concepts                                                                                                                                                                                                                                                                                                            |
|-------|-------------------------------------------------------------------------------------|-------------------------------------------------------------------------------------------------------------------|-------------------------------------------------------------------------------------------------------------------------------------------------------------------------------------------------------------------------------------------------------------------------------------------------------------------------|
| 474   |    | flight,bird,birds<br>fighter,jet,plane<br>australia,nature,wildlife<br>wing,flight,aviation<br>booby,kauai,hawaii | root-seagull:ROOT<br>root-gull:ROOT<br>seagull-a:DET<br>flying-river:PREP_OVER<br>flying-bird:NSUBJ<br>root-seagulls:ROOT<br>egret-great:AMOD<br>bird-sky:PREP_IN<br>bird-flying:XCOMP<br>bird-flight:PREP_IN<br>flying-lake:PREP_OVER<br>gull-a:DET<br>flying-house:DOBJ<br>bird-flying:VMOD<br>flying-beach:PREP_OVER |
| 475   |   | boat,lake,blue<br>craft,handmade,dress<br>italy,pet,nature<br>flight,plane,aviation<br>photo,portrait,people      | bag-plastic:AMOD<br>box-newspaper:NN<br>root-tank:ROOT<br>bucket-a:DET<br>shape-good:AMOD<br>table-chairs:CONJ_AND<br>water-rain:NN<br>root-pot:ROOT<br>trash-the:DET<br>surface-a:DET<br>metal-the:DET<br>wash-to:AUX<br>filled-water:PREP_WITH<br>door-car:NN<br>tub-hot:AMOD                                         |
| 476   |  | dogs,funny,cute<br>horses,portrait,animal<br>dog,animals,explore<br>funny,cute,nature<br>puppy,baby,animals       | bag-the:DET<br>root-ginger:ROOT<br>bag-sleeping:AMOD<br>root-sleeps:ROOT<br>sleeping-basket:PREP_IN<br>cat-bag:PREP_IN<br>cats-two:NUM<br>root-cats:ROOT<br>chair-office:PREP_IN<br>house-cat:NN<br>sitting-basket:PREP_IN<br>taking-nap:DOBJ<br>puppy-cute:AMOD<br>pillow-a:DET<br>sleeping-sun:PREP_IN                |

Continued on next page

Table1 – continued from previous page

| Index | Image                                                                               | NUS-WIDE Concepts                                                                                                                    | SBU Concepts                                                                                                                                                                                                                                                                                                  |
|-------|-------------------------------------------------------------------------------------|--------------------------------------------------------------------------------------------------------------------------------------|---------------------------------------------------------------------------------------------------------------------------------------------------------------------------------------------------------------------------------------------------------------------------------------------------------------|
| 477   |    | roadblock,protest,london demonstration,paris,police parade,seattle,officers photojournalism,color,olympus riot,photojournalism,color | shirt-red:AMOD<br>girl-red:PREP_IN<br>boy-red:PREP_IN<br>bottles-water:PREP_OF<br>race-a:DET<br>root-men:ROOT<br>pants-the:DET<br>man-shirt:PREP_IN<br>girls-school:NN<br>women-the:DET<br>root-team:ROOT<br>root-club:ROOT<br>girls-young:AMOD<br>coat-red:AMOD<br>pants-red:AMOD                            |
| 478   |   | motorcycle,road,sky racing,classic,cars formula,historic,classic track,formula,race sport,race,car                                   | race-the:DET<br>suit-the:DET<br>boys-blue:PREP_IN<br>spotted-car:NSUBJ<br>motorcycle-a:DET<br>race-mountain:NN<br>race-a:DET<br>machine-green:AMOD<br>root-show:ROOT<br>race-bike:NN<br>root-stage:ROOT<br>show-car:NN<br>trucks-the:DET<br>bags-the:DET<br>parked-street:PREP_ON                             |
| 479   |  | vacation,europe,blue washington,snow,trees apartments,pool,swimming sunlight,trees,architecture politicians,bush,washington          | bridge-beautiful:AMOD<br>house-white:AMOD<br>street-house:PREP_FROM<br>root-row:ROOT<br>remember-do:AUX<br>dc-washington:NN<br>balcony-hotel:NN<br>row-a:DET<br>fence-picket:NN<br>goes-bridge:NSUBJ<br>window-bus:NN<br>building-wooden:AMOD<br>building-largest:AMOD<br>live-in:PRT<br>building-little:AMOD |

Continued on next page



**Table1 – continued from previous page**

| Index | Image                                                                               | NUS-WIDE Concepts                                                                                                            | SBU Concepts                                                                                                                                                                                                                                                                                                                               |
|-------|-------------------------------------------------------------------------------------|------------------------------------------------------------------------------------------------------------------------------|--------------------------------------------------------------------------------------------------------------------------------------------------------------------------------------------------------------------------------------------------------------------------------------------------------------------------------------------|
| 480   |    | red,light,colors<br>flags,america,architecture<br>stripes,lines,blue<br>vehicle,vintage,automobile<br>montreal,red,subway    | garage-parking:NN<br>root-chairs:ROOT<br>red-blue:CONJ_AND<br>flag-american:AMOD<br>root-clothes:ROOT<br>red-white:AMOD<br>paint-the:DET<br>while-car:NN<br>subway-the:DET<br>chairs-beach:NN<br>root-rail:ROOT<br>red-white:CONJ_AND<br>site-construction:NN<br>root-work:ROOT<br>sign-park:PREP_IN                                       |
| 481   |   | tollbooth,illinois,chicago<br>riot,world,italy<br>ontario,mall,city<br>protest,france,protesters<br>roadblock,protest,london | street-city:PREP_IN<br>bus-tour:NN<br>scene-street:NN<br>sign-green:AMOD<br>street-main:AMOD<br>buses-the:DET<br>walking-street:DOBJ<br>sign-background:PREP_IN<br>road-busy:AMOD<br>castle-background:PREP_IN<br>building-background:PREP_IN<br>middle-street:PREP_OF<br>station-bus:NN<br>pictures-pictures:NSUBJ<br>road-beach:NN       |
| 482   |  | road,city,people<br>tollbooth,illinois,chicago<br>tokyo,buildings,night<br>riot,world,italy<br>urban,skyline,sky             | sign-blue:AMOD<br>building-blue:AMOD<br>building-distance:PREP_IN<br>view-street:PREP_OF<br>road-busy:AMOD<br>street-house:PREP_NEAR<br>view-street:NN<br>downtown-the:DET<br>building-background:PREP_IN<br>road-ring:NN<br>building-brown:AMOD<br>building-black:AMOD<br>tower-distance:PREP_IN<br>building-green:AMOD<br>root-city:ROOT |

Continued on next page

Table1 – continued from previous page

| Index | Image                                                                               | NUS-WIDE Concepts                                                                                               | SBU Concepts                                                                                                                                                                                                                                                                                    |
|-------|-------------------------------------------------------------------------------------|-----------------------------------------------------------------------------------------------------------------|-------------------------------------------------------------------------------------------------------------------------------------------------------------------------------------------------------------------------------------------------------------------------------------------------|
| 483   |    | sewing,country,doll<br>shore,natural,blue<br>underwater,dive,nature<br>craft,handmade,dress<br>angel,fish,water | blue-white:CONJ_AND<br>blue-dark:AMOD<br>tank-water:NN<br>green-dark:AMOD<br>wire-chicken:NN<br>bag-market:NN<br>sitting-garden:PREP_IN<br>shell-a:DET<br>made-glass:PREP_OF<br>root-basket:ROOT<br>silver-the:DET<br>grill-the:DET<br>table-garden:PREP_IN<br>tank-a:DET<br>house-yard:PREP_IN |
| 484   |   | dogs,funny,cute<br>puppy,baby,animals<br>dog,animals,explore<br>cute,dog,puppy<br>cats,kitten,pets              | girl-bed:PREP_IN<br>pillow-a:DET<br>animals-the:DET<br>dog-brown:AMOD<br>root-sleeps:ROOT<br>cat-bag:PREP_IN<br>bed-room:PREP_IN<br>chair-pink:AMOD<br>nap-a:DET<br>pig-the:DET<br>root-cats:ROOT<br>root-nap:ROOT<br>chair-bag:NN<br>banks-outer:NN<br>running-house:PREP_AROUND               |
| 485   |  | cat,kitten,kitty<br>cats,kitten,pets<br>kitty,orange,cats<br>pet,dog,rabbit<br>kitten,fun,jump                  | cats-black:AMOD<br>tree-cat:NN<br>cat-black:AMOD<br>root-loves:ROOT<br>cats-two:NUM<br>sitting-box:PREP_IN<br>root-cats:ROOT<br>cat-kitchen:PREP_IN<br>playing-basket:PREP_IN<br>cat-house:NN<br>cat-box:PREP_IN<br>cats-playing:DEP<br>loves-cat:NSUBJ<br>cats-the:DET<br>box-new:AMOD         |

Continued on next page

Table1 – continued from previous page

| Index                  | Image                                                                               | NUS-WIDE Concepts                                                                                                                     | SBU Concepts                                                                                                                                                                                                                                                                                                                                           |
|------------------------|-------------------------------------------------------------------------------------|---------------------------------------------------------------------------------------------------------------------------------------|--------------------------------------------------------------------------------------------------------------------------------------------------------------------------------------------------------------------------------------------------------------------------------------------------------------------------------------------------------|
| 486                    |    | <p>park,animal,wildlife<br/> big,animal,wildlife<br/> long,white,hair<br/> tusks,nature,safari<br/> african,animal,zoo</p>            | <p>root-lion:ROOT<br/> pony-a:DET<br/> cave-a:DET<br/> elephant-baby:NN<br/> elephant-a:DET<br/> root-cave:ROOT<br/> lion-a:DET<br/> lion-the:DET<br/> springs-hot:NN<br/> elephant-male:AMOD<br/> lion-female:AMOD<br/> wild-the:DET<br/> old-year:NPADVMOD<br/> bear-black:AMOD<br/> cub-the:DET</p>                                                 |
| 487                    |   | <p>roadblock,water,tree<br/> road,clouds,landscape<br/> road,forest,europe<br/> taiwan,green,architecture<br/> airport,runway,sky</p> | <p>root-roads:ROOT<br/> line-white:AMOD<br/> bridge-road:PREP_OVER<br/> road-bridge:DEP<br/> over-bridge:POBJ<br/> road-front:PREP_IN<br/> from-bridge:POBJ<br/> cows-road:PREP_IN<br/> road-long:AMOD<br/> road-the:DET<br/> bridge-distance:PREP_IN<br/> road-house:PREP_TO<br/> road-house:PREP_BY<br/> view-road:PREP_OF<br/> bridge-lake:DOBJ</p> |
| 488                    |  | <p>adult,bird,birds<br/> summer,river,sea<br/> fab,animal,animals<br/> scotland,nature,cow<br/> waterfall,creek,moss</p>              | <p>pot-plant:NN<br/> duck-black:AMOD<br/> cat-garden:PREP_IN<br/> bird-sitting:VMOD<br/> rica-costa:NN<br/> bath-bird:NN<br/> basking-sun:PREP_IN<br/> bird-white:AMOD<br/> bird-water:NN<br/> one-birds:PREP_OF<br/> house-tropical:AMOD<br/> sitting-fence:PREP_ON<br/> made-home:DOBJ<br/> tree-banana:NN<br/> hangs-out:PRT</p>                    |
| Continued on next page |                                                                                     |                                                                                                                                       |                                                                                                                                                                                                                                                                                                                                                        |

Table1 – continued from previous page

| Index                  | Image                                                                               | NUS-WIDE Concepts                                                                                                                | SBU Concepts                                                                                                                                                                                                                                                                                |
|------------------------|-------------------------------------------------------------------------------------|----------------------------------------------------------------------------------------------------------------------------------|---------------------------------------------------------------------------------------------------------------------------------------------------------------------------------------------------------------------------------------------------------------------------------------------|
| 489                    |    | natural,trees,tree<br>fall,park,water<br>england,green,water<br>portland,lights,microphones<br>photographer,people,photographers | root-met:ROOT<br>young-girl:DEP<br>boy-blue:PREP_IN<br>game-ball:NN<br>smile-a:DET<br>in-shirt:POBJ<br>root-visit:ROOT<br>one-girls:PREP_OF<br>flower-hair:PREP_IN<br>cute-boy:DOBJ<br>in-car:POBJ<br>girl-coat:PREP_IN<br>greens-the:DET<br>home-bus:NN<br>root-smile:ROOT                 |
| 490                    |   | suburban,car,wild<br>hospital,people,california<br>drawing,nature,colors<br>cake,groom,party<br>home,interior,design             | chair-green:AMOD<br>chair-pink:AMOD<br>root-students:ROOT<br>students-the:DET<br>table-train:NN<br>girl-chair:PREP_IN<br>home-new:AMOD<br>in-office:POBJ<br>chair-orange:AMOD<br>bags-the:DET<br>boy-box:PREP_IN<br>box-big:AMOD<br>guitar-a:DET<br>chair-room:PREP_IN<br>movie-a:DET       |
| 491                    |  | cow,rural,sky<br>pups,baby,pet<br>dog,beach,water<br>cows,england,explore<br>sheep,dog,white                                     | root-dogs:ROOT<br>cow-a:DET<br>root-cow:ROOT<br>walking-dogs:DOBJ<br>dog-service:NN<br>horse-white:AMOD<br>dog-white:AMOD<br>girl-dog:CONJ_AND<br>cow-the:DET<br>dogs-the:DET<br>family-foster:AMOD<br>retriever-golden:AMOD<br>taken-family:AGENT<br>boy-dog:CONJ_AND<br>horses-white:AMOD |
| Continued on next page |                                                                                     |                                                                                                                                  |                                                                                                                                                                                                                                                                                             |



**Table1 – continued from previous page**

| Index                  | Image                                                                               | NUS-WIDE Concepts                                                                                                       | SBU Concepts                                                                                                                                                                                                                                                                                         |
|------------------------|-------------------------------------------------------------------------------------|-------------------------------------------------------------------------------------------------------------------------|------------------------------------------------------------------------------------------------------------------------------------------------------------------------------------------------------------------------------------------------------------------------------------------------------|
| 492                    |    | ruins,asia,decay<br>roof>window,red<br>village,spain,windows<br>japanese,garden,red<br>world,germany,berlin             | walls-city:NN<br>walls-old:AMOD<br>walls-the:DET<br>wall-old:AMOD<br>wall-castle:PREP_OF<br>walls-castle:PREP_OF<br>wall-garden:PREP_IN<br>wall-stone:NN<br>wall-castle:NN<br>wall-city:NN<br>base-tower:PREP_OF<br>bricks-the:DET<br>part-wall:PREP_OF<br>wall-ancient:AMOD<br>wall-a:DET           |
| 493                    |   | sails,sailboat,sail<br>sailboat,ship,blue<br>boat,sail,sailing<br>sailboat,sails,sail<br>boats,ships,ship               | root-sail:ROOT<br>sail-boat:DOBJ<br>boat-sail:AMOD<br>sailboat-a:DET<br>boats-sail:AMOD<br>sail-to:AUX<br>one-boats:PREP_OF<br>boat-blue:AMOD<br>sail-the:DET<br>boat-river:PREP_IN<br>lake-clear:NN<br>boat-harbor:PREP_IN<br>boat-tour:NN<br>river-phraya:NN<br>races-boat:NN                      |
| 494                    |  | historical,fun,traditional<br>paris,panorama,polar<br>drum,festival,rock<br>london,people,protest<br>rock,music,concert | looks-on:PRT<br>band-the:DET<br>root-father:ROOT<br>root-band:ROOT<br>truck-a:DET<br>reflection-window:NN<br>band-rock:NN<br>root-mike:ROOT<br>light-window:PREP_FROM<br>model-the:DET<br>window-bar:NN<br>girl-mirror:PREP_IN<br>reflection-window:PREP_IN<br>jacket-black:AMOD<br>guy-sitting:VMOD |
| Continued on next page |                                                                                     |                                                                                                                         |                                                                                                                                                                                                                                                                                                      |

Table1 – continued from previous page

| Index | Image                                                                               | NUS-WIDE Concepts                                                                                                           | SBU Concepts                                                                                                                                                                                                                                                                                                      |
|-------|-------------------------------------------------------------------------------------|-----------------------------------------------------------------------------------------------------------------------------|-------------------------------------------------------------------------------------------------------------------------------------------------------------------------------------------------------------------------------------------------------------------------------------------------------------------|
| 495   |    | house,home,interior<br>wow,light,people<br>prison,orange,woman<br>retro,black,portrait<br>lights,street,people              | me-front:PREP_IN<br>standing-girl:NN<br>standing-me:NSUBJ<br>root-standing:ROOT<br>standing-front:PREP_IN<br>shoes-white:AMOD<br>skirt-the:DET<br>dress-blue:AMOD<br>standing-around:PRT<br>boy-white:AMOD<br>root-ladies:ROOT<br>girls-black:PREP_IN<br>floor-dance:NN<br>dress-black:AMOD<br>lady-dress:PREP_IN |
| 496   |   | bike,motorcycle,race<br>motorcycle,motion,asia<br>bicycle,motion,girl<br>officers,motorcycle,people<br>motorcycle,road,sky  | bike-front:PREP_IN<br>bicycle-a:DET<br>root-ride:ROOT<br>race-a:DET<br>bike-road:NN<br>ride-bike:NSUBJ<br>dog-basket:PREP_IN<br>ride-to:AUX<br>tour-bike:NN<br>ride-bike:DOBJ<br>bike-mountain:NN<br>horse-drawn:VMOD<br>cap-the:DET<br>motorcycle-a:DET<br>truck-white:AMOD                                      |
| 497   |  | subway,people,graffiti<br>cabin,airplane,plane<br>telephones,night,red<br>tollbooth,car,lights<br>underground,people,street | booth-a:DET<br>booth-telephone:NN<br>phone-a:DET<br>sign-yellow:AMOD<br>machine-green:AMOD<br>box-phone:NN<br>booth-phone:NN<br>root-machine:ROOT<br>booth-the:DET<br>machine-a:DET<br>train-sky:NN<br>office-box:NN<br>dog-hot:AMOD<br>root-phone:ROOT<br>machine-vending:AMOD                                   |

Continued on next page

Table1 – continued from previous page

| Index | Image                                                                               | NUS-WIDE Concepts                                                                                                                 | SBU Concepts                                                                                                                                                                                                                                                                                       |
|-------|-------------------------------------------------------------------------------------|-----------------------------------------------------------------------------------------------------------------------------------|----------------------------------------------------------------------------------------------------------------------------------------------------------------------------------------------------------------------------------------------------------------------------------------------------|
| 498   |    | track, locomotive, engine<br>train, engine, steam<br>railway, bridge, steam<br>auto, truck, canada<br>rail, engine, steam         | train-freight:NN<br>canal-ship:NN<br>car-abandoned:AMOD<br>train-an:DET<br>passes-bridge:PREP_UNDER<br>root-heads:ROOT<br>train-road:NN<br>yard-train:NN<br>root-truck:ROOT<br>truck-an:DET<br>town-historic:NN<br>truck-a:DET<br>root-rolls:ROOT<br>root-train:ROOT<br>trucks-the:DET             |
| 499   |   | trip, summer, people<br>wow, light, people<br>dog, beach, water<br>wings, bird, sky<br>war, world, army                           | root-display:ROOT<br>fish-fresh:AMOD<br>root-show:ROOT<br>show-car:NN<br>market-japan:PREP_IN<br>fair-street:NN<br>display-window:NSUBJ<br>store-shoe:NN<br>root-vendor:ROOT<br>window-shop:NN<br>shop-shoe:NN<br>pink-black:CONJ_AND<br>job-a:DET<br>show-a:DET<br>market-place:NN                |
| 500   |  | bus, abandoned, clouds<br>car, automobile, truck<br>automobile, truck, california<br>auto, truck, canada<br>vintage, car, classic | car-an:DET<br>one-cars:PREP_OF<br>car-old:AMOD<br>parked-car:NSUBJ<br>parked-street:PREP_IN<br>car-classic:AMOD<br>bus-school:NN<br>car-abandoned:AMOD<br>root-van:ROOT<br>car-street:PREP_IN<br>parked-street:PREP_ON<br>car-sitting:VMOD<br>root-coach:ROOT<br>cars-old:AMOD<br>car-vintage:AMOD |
